# Supplementary material for: Integrated Metagenomics/Metaproteomics Reveals Human Host-Microbiota Signatures of Crohn's Disease
Source: PLoS One. 2012 Nov 28;7(11):e49138. doi: 10.1371/journal.pone.0049138 (PMC3509130; doi:10.1371/journal.pone.0049138)
Supplement: Table S5 — Normalized total spectra counts across all subjects and 24 MS runs for the matched metagenome (MM) database searches. (XLS) [file pone.0049138.s002.xls]

## Sheet: Normalized Spectra_AllMSRuns
Protein	6a_2	6a_3	6b_1	6b_2	9a_1	9a_2	9b_1	9b_2	10a_1	10a_3	10b_1	10b_2	15a_1	15a_2	15b_1	15b_2	16a_1	16a_2	16b_2	16b_3	18a_1	18a_2	18b_1	18b_2
156863326|EDO56757.1|411489 PFAM:PF00208.14,KEGG:K00262,PFAM:PF02812.11,COG:COG0334 Glutamate dehydrogenase/leucine dehydrogenase	0	0	0	0	0	0	0	0	0	0	0	0	0	0	0	0	0	0	7.2	6.3	0	0	0	0
238884182|EEQ47820.1|638302	0	0	0	1	0	0	0	0	0	0	0	0	0	0	0	0	0	0	0	0	0	0	0	0
CLST000005 TIGR:TIGR00485,COG:COG0050,KEGG:K02358 GTPases - translation elongation factors	0	3.5	1	1	0	0	8.1	6.9	0	0	2.2	1.1	0	0	0	0	0	0	6.3	9.1	0	0	0.9	1.8
CLST000006 TIGR:TIGR01067,KEGG:K02874,COG:COG0093 Ribosomal protein L14	13.8	18.9	5.1	1	4.5	5.4	6	8.9	4.6	3.7	19.7	19	11	15	10.3	8.1	15.8	19	10.8	8.2	6.3	8.7	5.4	8
CLST000009 TIGR:TIGR01022,PFAM:PF00444.11,KEGG:K02919,COG:COG0257,NOG:NOG148458 Annotation not available	0	0	0	0	0	0	0	0	0	3.7	0	0	0	0	0	0	0	0	0	0	0	0	0	0
CLST000011 COG:COG0100,TIGR:TIGR03631,KEGG:K02948,TIGR:TIGR03632 Ribosomal protein S11	13.8	15.3	10.2	8.2	9	6.3	10.1	4	7.3	9.2	8.8	6.7	15	16	11.3	12.2	11.3	7.4	32.4	29	10.6	5.4	26.9	26.7
CLST000015 KEGG:K02518,COG:COG0361,TIGR:TIGR00008 Translation initiation factor 1 (IF-1)	0	0	0	0	0	0	0	2	0	0	0	0	0	0	0	0	0	0	0	0	0	0	0	0
CLST000018 KEGG:K00656,COG:COG1882,TIGR:TIGR01255 Pyruvate-formate lyase	0	0	0	0	0	0	0	0	0	0	0	0	0	0	0	0	0	0	0	0	0	0	15.2	19.6
CLST000021 TIGR:TIGR00981,KEGG:K02950,COG:COG0048 Ribosomal protein S12	0	0	0	0	0.9	0	0	0	0	0	0	0	0	0	0	0	0	0	0	0	0	0	0	0
CLST000022 COG:COG0051,TIGR:TIGR01049,KEGG:K02946 Ribosomal protein S10	0	0	0	0	0	0	0	2	0	0	0	0	1	0	0	0	0	0	0	0	4.2	2.2	0	0
CLST000024 PFAM:PF00253.14,KEGG:K02954,COG:COG0199 Ribosomal protein S14	0	0	0	0	0	0	0	0	0	0	0	0	0	0	0	0	0	0	0	0	5.3	0	0	0
CLST000025 TIGR:TIGR01050,PFAM:PF00203.14,KEGG:K02965,COG:COG0185 Ribosomal protein S19	0	0	0	2.1	0	0	0	0	0	0	0	0	0	0	0	0	4.5	0	0	0	4.2	9.8	0	0
CLST000027 COG:COG0080,TIGR:TIGR01632,KEGG:K02867 Ribosomal protein L11	0	0	0	0	0	0	0	0	0	0	0	0	2	2.1	7.2	3	0	0	0	0	1.1	2.2	0	0
CLST000028 KEGG:K02899,TIGR:TIGR00062,COG:COG0211 Ribosomal protein L27	4.2	0	5.1	6.2	3.6	0	0	0	8.2	6.4	2.2	4.5	6	6.4	0	8.1	0	0	3.6	0	0	7.6	3.6	4.4
CLST000029 PFAM:PF00004.22,COG:COG3451,PFAM:PF02861.13,KEGG:K03695,TIGR:TIGR03346,COG:COG0542 ATPases with chaperone activity, ATP-binding subunit	13.8	18.9	13.3	12.4	5.4	8.2	11.1	7.9	1.8	1.8	0	1.1	12	17.1	3.1	8.1	2.3	2.1	9.9	10	0	0	3.6	4.4
CLST000032 COG:COG0094,PFAM:PF00673.14,PFAM:PF00281.12,KEGG:K02931 Ribosomal protein L5	0	0	3.1	2.1	0	0	0	3	0	0	0	0	0	4.3	0	0	0	0	0	0	2.1	2.2	0	0
CLST000036 TIGR:TIGR01029,COG:COG0049,KEGG:K02992 Ribosomal protein S7	0	0	0	0	0	0	0	0	0	0	0	0	0	2.1	0	0	0	0	0	0	0	0	0	0
CLST000041 KEGG:K02112,COG:COG0055,TIGR:TIGR01039 F0F1-type ATP synthase, beta subunit	0	0	0	0	0	0	0	0	0	0	0	0	0	0	0	0	0	0	0	0	0	0	1.8	1.8
CLST000042 TIGR:TIGR03635,KEGG:K02961,COG:COG0186 Ribosomal protein S17	0	0	0	0	0	0	0	0	0	0	0	0	0	0	0	0	0	0	0	0	3.2	3.3	0	0
CLST000047 TIGR:TIGR02383,KEGG:K03666,COG:COG1923 Uncharacterized host factor I protein	0	0	0	0	0	0	0	0	0	0	0	0	0	0	0	0	3.4	2.1	0	0	0	0	0	0
CLST000050 KEGG:K02878,TIGR:TIGR01164,PFAM:PF00252.11,COG:COG0197 Ribosomal protein L16/L10E	0	0	0	0	0	0	0	0	0	0	0	0	0	0	0	0	0	0	0	0	2.1	0	0	0
CLST000052 TIGR:TIGR00483,TIGR:TIGR00485,COG:COG0050,KEGG:K02358,TIGR:TIGR00475 GTPases - translation elongation factors	5.3	8.3	0	0	9.9	10	12.1	16.8	0.9	0	18.6	11.2	0	0	1	4.1	0	0	0	0	1.1	3.3	12.6	9.8
CLST000056 COG:COG0459,TIGR:TIGR02348,KEGG:K04077 Chaperonin GroEL (HSP60 family)	0	2.4	0	0	0	0.9	2	0	0	0	0	0	9	10.7	0	2	2.3	1.1	0	0	24.3	19.6	0	0
CLST000058 COG:COG0776,PFAM:PF00216.14,KEGG:K03530 Bacterial nucleoid DNA-binding protein	2.1	5.9	0	0	0	0	2	0	0	0	0	0	5	5.3	0	0	0	0	0	0	6.3	2.2	0	0
CLST000061 TIGR:TIGR01003,COG:COG1925,KEGG:K11189 Phosphotransferase system, HPr-related proteins	2.1	0	0	4.1	0	0	0	0	0	0	0	0	2	0	5.2	0	0	0	0	0	0	2.2	0	0
CLST000065 KEGG:K02963,COG:COG0238,PFAM:PF01084.13,TIGR:TIGR00165 Ribosomal protein S18	0	0	0	0	0	0	0	0	0	0	0	0	2	0	0	0	0	0	0	0	2.1	2.2	0	0
CLST000066 KEGG:K02876,COG:COG0200,TIGR:TIGR01071 Ribosomal protein L15	0	0	0	0	0	0	0	0	0	0	0	0	0	0	0	1	0	0	0	0	0	0	0	0
CLST000070 COG:COG0148,KEGG:K01689,TIGR:TIGR01060 Enolase	1.1	0	4.1	4.1	0	0	2	0	0	0	0	2.2	0	0	0	0	0	0	0	0	4.2	2.2	6.3	9.8
CLST000073 PFAM:PF01197.11,KEGG:K02909,COG:COG0254 Ribosomal protein L31	0	0	0	0	0	0	2	0	0	0	0	0	0	4.3	0	0	0	0	0	0	4.2	5.4	0	0
CLST000080 COG:COG0516,TIGR:TIGR01302,KEGG:K00088 IMP dehydrogenase/GMP reductase	0	0	0	0	0	0	0	0	0	0	0	0	0	0	0	0	0	0	2.7	0	0	1.1	0	0
CLST000093 NOG:NOG44176 Atp/Gtp-Binding protein	0	0	0	0	0	3.6	0	0	0	0	0	0	0	0	0	0	0	0	0	0	0	0	1.8	0
CLST000098 TIGR:TIGR01024,COG:COG0335,KEGG:K02884 Ribosomal protein L19	0	0	2	0	0	0	0	0	0	0	0	0	0	0	0	0	0	0	0	0	3.2	3.3	0	0
CLST000107 TIGR:TIGR00981,KEGG:K02950,NOG:NOG139108,COG:COG0048 Annotation not available	2.1	0	0	0	0	1.8	0	0	0	0	0	0	0	0	2.1	2	0	0	0.9	1.8	0	0	0	0
CLST000108 KEGG:K02994,PFAM:PF00410.12,COG:COG0096 Ribosomal protein S8	0	0	0	2.1	0	0	0	0	0	0	0	0	0	3.2	0	0	0	0	0	0	3.2	3.3	0	0
CLST000132 TIGR:TIGR01044,KEGG:K02890,COG:COG0091 Ribosomal protein L22	2.1	0	0	2.1	0	0	0	0	0	0	0	0	0	0	0	0	0	0	0	0	3.2	3.3	0	1.8
CLST000134 COG:COG0459,TIGR:TIGR02348,KEGG:K04077 Chaperonin GroEL (HSP60 family)	0	0	0	0	0	1.8	0	0	0	0	0	0	0	0	0	0	0	0	0	0	0	0	0	0
CLST000135 COG:COG0086,KEGG:K03046,TIGR:TIGR02386 DNA-directed RNA polymerase, beta subunit/160 kD subunit	0	0	0	0	0	0	0	0	0	0	0	0	0	0	0	0	0	0	0	0	0	0	0.9	1.8
CLST000140 TIGR:TIGR00060,COG:COG0256,KEGG:K02881 Ribosomal protein L18	0	0	0	0	0	0	0	0	0	0	0	0	0	2.1	0	0	0	0	0	0	3.2	4.4	0	0
CLST000141 hypothetical protein	0	0	0	0	0	0	0	0	0	0	0	0	0	0	0	0	0	0	0	0	0	0	0.9	0.9
CLST000151 TIGR:TIGR02013,COG:COG0085,KEGG:K03043 DNA-directed RNA polymerase, beta subunit/140 kD subunit	0	0	0	0	0	0	0	0	0	0	0	0	0	0	0	0	0	0	0	0	0	0	0.9	0.9
CLST000153 KEGG:K02111,COG:COG0056,TIGR:TIGR00962 F0F1-type ATP synthase, alpha subunit	0	0	0	0	0	0	0	0	0	0	0	0	1	0	0	0	0	0	0	0	0	0	1.8	0.9
CLST000172 KEGG:K03695,TIGR:TIGR03346,COG:COG0542 ATPases with chaperone activity, ATP-binding subunit	0	0	0	0	0	0	0	0	0	0	0	0	0	0	0	0	0	0	0	0	0	0	0.9	0
CLST000178 TIGR:TIGR00224,COG:COG1866,KEGG:K01610 Phosphoenolpyruvate carboxykinase (ATP)	0	0	0	0	0	0	0	0	0	0	0	0	0	0	0	0	0	0	0	0	0	0	0.9	0
CLST000182 hypothetical protein	0	0	0	0	0	0	0	0	0	0	0	0	0	0	0	0	0	0	0	0	0	0	1.8	0.9
CLST000183 COG:COG0100,KEGG:K02948,TIGR:TIGR03632 Ribosomal protein S11	1.1	2.4	2	0	7.2	9.1	2	3	0.9	6.4	7.7	13.4	0	0	0	0	5.6	7.4	0	0	0	0	3.6	1.8
CLST000191 COG:COG0480,TIGR:TIGR00484,KEGG:K02355 Translation elongation factors (GTPases)	0	0	0	0	0	0	0	0	0	0	0	0	0	0	0	0	0	0	0	0	5.3	4.4	0	0
CLST000194 COG:COG0148,KEGG:K01689,TIGR:TIGR01060 Enolase	0	0	0	0	0	0	0	0	0	0.9	0	0	0	0	0	0	0	0	0	0	0	0	7.2	3.6
CLST000202 hypothetical protein	0	1.2	1	0	0	0	0	0	0	0	1.1	0	0	0	0	0	0	0	0	0	0	0	10.8	13.3
CLST000204 hypothetical protein	0	0	0	0	0	0	0	0	0	0	0	0	0	0	0	0	0	0	0	0	0	0	2.7	0
CLST000206 hypothetical protein	0	0	0	0	0	0	0	0	0	0	0	0	0	0	0	0	0	0	0	0	0	0	2.7	1.8
CLST000208 NOG:NOG10616 Annotation not available	35	44.8	53.3	57.7	23.3	25.4	24.2	2	27.4	33	28.5	29	37	34.2	58.8	60.9	10.1	11.6	46.8	48.9	32.8	20.7	47.5	45.4
CLST000213 TIGR:TIGR00012,KEGG:K02904,COG:COG0255 Ribosomal protein L29	0	0	0	0	0	0	0	0	0	0	0	0	0	0	0	0	0	0	0	0	0	0	0	2.7
CLST000228 TIGR:TIGR01024,COG:COG0335,KEGG:K02884 Ribosomal protein L19	0	0	0	0	0	0	0	0	0	0	0	0	0	0	0	0	0	0	0	0	0	0	4.5	2.7
CLST000238 TIGR:TIGR01829,TIGR:TIGR01963,TIGR:TIGR01830,KEGG:K00046,TIGR:TIGR01832,TIGR:TIGR02415,COG:COG1028 Dehydrogenases with different specificities (related to short-chain alcohol dehydrogenases)	22.3	17.7	5.1	3.1	0	0	6	3	1.8	4.6	0	0	0	0	0	0	0	0	8.1	10.9	0	0	9.9	12.5
CLST000244 TIGR:TIGR01251,KEGG:K00948,COG:COG0462 Phosphoribosylpyrophosphate synthetase	0	0	0	0	0	0	0	0	0	0	0	0	0	0	0	0	0	0	0	0	0	0	1.8	0.9
CLST000248 TIGR:TIGR00981,KEGG:K02950,COG:COG0048 Ribosomal protein S12	0	0	0	0	0	0.9	0	0	0.9	0	0	0	0	0	0	0	0	0	0	0	0	0	3.6	0.9
CLST000254 TIGR:TIGR00224,COG:COG1866,KEGG:K01610 Phosphoenolpyruvate carboxykinase (ATP)	74.3	115.7	129.1	132.8	36.7	31.7	27.2	32.7	47.5	56.8	87.7	68.1	34	55.5	32	35.5	29.3	30.6	110.7	115	37	31.5	60.1	65.9
CLST000259 COG:COG0086,KEGG:K03046,TIGR:TIGR02386 DNA-directed RNA polymerase, beta subunit/160 kD subunit	1.1	0	0	0	0	0	0	0	0	0	0	0	0	0	0	0	0	0	0	0	0	0	0	0
CLST000263 hypothetical protein	0	0	0	0	0	0	0	0	0	0	0	0	0	0	0	0	0	0	0	0	0	0	0.9	0.9
CLST000264 KEGG:K01876,TIGR:TIGR00459,COG:COG0173 Aspartyl-tRNA synthetase	0	0	0	0	0	0	0	0	0	0	0	0	0	0	0	0	0	0	0	0	0	0	0.9	0.9
CLST000268 KEGG:K02956,TIGR:TIGR00952,COG:COG0184 Ribosomal protein S15P/S13E	0	0	0	0	0	0	0	0	0	0	0	0	2	3.2	0	0	0	0	0	0	2.1	0	0	0
CLST000269 TIGR:TIGR02012,KEGG:K03553,COG:COG0468 RecA/RadA recombinase	0	0	0	0	0	0	0	0	0	0	2.2	0	0	0	0	0	0	0	0	0	0	0	0	0
CLST000280 KEGG:K02518,COG:COG0361,TIGR:TIGR00008 Translation initiation factor 1 (IF-1)	0	0	0	0	0	0	2	0	0	2.7	3.3	2.2	0	0	0	0	0	4.2	0	0	0	0	0	0
CLST000283 KEGG:K00656,COG:COG1882,TIGR:TIGR01255 Pyruvate-formate lyase	0	0	0	0	0	0	0	0	0	0	0	0	0	0	0	0	0	0	0.9	0	0	0	0	0
CLST000289 TIGR:TIGR01050,KEGG:K02965,COG:COG0185 Ribosomal protein S19	0	0	0	0	1.8	2.7	0	0	5.5	4.6	2.2	3.3	0	0	0	0	6.8	5.3	0	0	0	0	0	0
CLST000290 KEGG:K02959,TIGR:TIGR00002,COG:COG0228 Ribosomal protein S16	0	0	0	0	0	0	0	0	0	0	0	0	0	2.1	0	0	0	0	0	0	0	2.2	0	0
CLST000296 COG:COG0051,TIGR:TIGR01049,KEGG:K02946 Ribosomal protein S10	7.4	4.7	5.1	4.1	5.4	4.5	4	4.9	1.8	4.6	13.2	12.3	0	0	0	0	12.4	8.4	0	0	0	0	3.6	2.7
CLST000298 hypothetical protein	0	0	0	0	0	0	0	0	0	0	0	0	0	0	0	0	0	0	0	0	0	0	1.8	0
CLST000304 KEGG:K06215,TIGR:TIGR00343,COG:COG0214 Pyridoxine biosynthesis enzyme	0	0	0	2.1	7.2	2.7	2	0	2.7	4.6	0	0	0	0	0	0	0	0	0	0	0	0	1.8	0
CLST000314 hypothetical protein	0	0	0	0	0	0	0	0	0	0	0	0	0	0	0	0	0	0	0	0	0	0	0.9	0.9
CLST000317 COG:COG0480,TIGR:TIGR00484,KEGG:K02355 Translation elongation factors (GTPases)	0	0	0	0	0	0	0	0	0	0	0	0	0	0	0	0	0	0	0	0	0	0	17.9	12.5
CLST000327 hypothetical protein	0	0	0	0	0	0	0	0	0	0	0	0	0	0	0	0	0	0	0	0	0	0	0	0.9
CLST000335 COG:COG0822 NifU homolog involved in Fe-S cluster formation	21.2	21.2	30.7	41.2	44.8	41.7	9.1	5.9	35.6	26.6	6.6	19	21	20.3	35	35.5	15.8	17.9	74.7	83.3	27.5	34.8	56.5	54.3
CLST000344 TIGR:TIGR02350,KEGG:K04043,COG:COG0443 Molecular chaperone	0	0	0	0	0	0	1	0	0	0	0	0	0	0	0	0	0	0	0	0	0	2.2	0	0
CLST000354 KEGG:K02600,COG:COG0195,TIGR:TIGR01953 Transcription elongation factor	0	0	0	0	0	0	0	0	0	0	0	0	0	0	0	0	0	0	0	0	0	0	1.8	1.8
CLST000357 TIGR:TIGR01534,COG:COG0057,KEGG:K00134 Glyceraldehyde-3-phosphate dehydrogenase/erythrose-4-phosphate dehydrogenase	5.3	4.7	9.2	13.4	0	0	4	3	0	0.9	0	0	4	5.3	1	0	0	0	0	0	18	18.5	11.7	8
CLST000359 COG:COG0039,TIGR:TIGR01772,KEGG:K00026 Malate/lactate dehydrogenases	0	0	0	0	0	0	0	0	0	0	0	0	0	0	0	0	0	0	0	0	0	0	8.1	4.4
CLST000366 KEGG:K04027,COG:COG4577,PFAM:PF00936.12 Carbon dioxide concentrating mechanism/carboxysome shell protein	3.2	0	3.1	0	0.9	0	0	0	9.1	7.3	4.4	4.5	1	0	0	0	0	0	0	0	0	0	0	0
CLST000385 TIGR:TIGR02997,TIGR:TIGR02393,COG:COG0568,KEGG:K03086 DNA-directed RNA polymerase, sigma subunit (sigma70/sigma32)	0	0	0	0	0	0	0	0	0	0	0	0	0	0	1	1	0	0	0	0	0	0	0	0
CLST000387 TIGR:TIGR00440,KEGG:K01886,COG:COG0008 Glutamyl- and glutaminyl-tRNA synthetases	0	0	0	0	0	0	0	0	0	0	0	0	0	0	0	0	0	0	0	0	0	0	0.9	0
CLST000444 KEGG:K00615,TIGR:TIGR00232,COG:COG0021 Transketolase	0	0	0	0	0	0	0	0	0	0	0	0	0	0	0	0	0	0	0	0	0	0	1.8	0
CLST000446 KEGG:K02988,TIGR:TIGR01021,COG:COG0098 Ribosomal protein S5	0	2.4	0	0	0	0	0	0	0	0	0	0	0	0	0	0	0	0	0	0	4.2	0	3.6	0
CLST000462 KEGG:K02886,TIGR:TIGR01171,COG:COG0090 Ribosomal protein L2	0	0	0	0	0	0	0	0	0	0	0	0	1	0	0	0	0	0	0	0	1.1	0	0	0
CLST000524 KEGG:K04072,COG:COG1454 Alcohol dehydrogenase, class IV	0	0	0	0	0	0	0	0	0	0	0	0	0	0	0	0	0	0	0	0	0	0	2.7	0.9
CLST000546 COG:COG0102,KEGG:K02871,TIGR:TIGR01066 Ribosomal protein L13	0	0	0	0	0	0	0	0	0	0	0	0	0	0	0	0	0	0	0	0	0	3.3	1.8	1.8
CLST000603 COG:COG0057,PFAM:PF00044.17,TIGR:TIGR01534,KEGG:K00134 Glyceraldehyde-3-phosphate dehydrogenase/erythrose-4-phosphate dehydrogenase	165.6	199.5	126	134.9	52	45.3	115.9	97	44.7	50.4	120.6	117.1	40	43.8	66	49.7	42.8	49.6	252.9	317.9	28.6	30.5	201.7	200.2
CLST000608 KEGG:K00602,TIGR:TIGR00355,COG:COG0138 AICAR transformylase/IMP cyclohydrolase PurH (only IMP cyclohydrolase domain in Aful)	0	0	0	0	0	0	0	0	0	0	0	0	0	0	0	0	0	0	0	0	0	0	1.8	0
CLST000732 TIGR:TIGR01822,KEGG:K00639,COG:COG0156 7-keto-8-aminopelargonate synthetase and related enzymes	0	0	0	0	0	0	0	0	0	0	0	0	0	0	0	0	0	0	0	0	0	0	0.9	0
CLST000738 KEGG:K00925,COG:COG0282,TIGR:TIGR00016 Acetate kinase	0	0	0	0	0	0	0	0	0	0	0	0	0	0	0	0	0	0	0	0	0	0	1.8	1.8
CLST000776 TIGR:TIGR00485 EF-Tu: translation elongation factor Tu	0	0	0	0	0	0	0	0	0	0	0	0	1	1.1	0	0	0	0	0	0	0	0	0	0
CLST000797 TIGR:TIGR00485,COG:COG0050,KEGG:K02358,TIGR:TIGR03680,TIGR:TIGR00475 GTPases - translation elongation factors	49.9	36.6	56.4	52.5	44.8	23.6	17.1	9.9	21	26.6	37.3	55.8	28	26.7	46.4	27.4	22.5	20.1	78.3	81.5	18	17.4	20.6	24
CLST000888 hypothetical protein	0	0	0	0	0	0	0	0	0	0	0	0	0	0	0	0	0	0	0	0	0	0	4.5	3.6
CLST000974 PFAM:PF00936.12,COG:COG4577 Carbon dioxide concentrating mechanism/carboxysome shell protein	0	0	1	0	0	0	1	0	5.5	9.2	11	21.2	3	3.2	1	0	2.3	1.1	0	0	0	0	10.8	14.2
CLST000977 COG:COG1209,TIGR:TIGR01207,KEGG:K00973 dTDP-glucose pyrophosphorylase	0	0	5.1	3.1	0	0	0	0	0	0	0	0	0	0	0	0	0	0	0	0	0	0	0	0
CLST000998 KEGG:K02867,COG:COG0080,TIGR:TIGR01632,PFAM:PF03946.7 Ribosomal protein L11	15.9	24.8	19.5	18.5	9.9	11.8	8.1	11.9	11.9	14.7	25.2	21.2	16	28.8	8.2	8.1	7.9	11.6	22.5	24.5	10.6	8.7	26	22.2
CLST001032 hypothetical protein	0	0	0	0	0	0	0	0	0	0	0	0	0	0	0	0	0	0	0	0	0	0	0.9	2.7
CLST001044 TIGR:TIGR00485,COG:COG0050,KEGG:K02358 GTPases - translation elongation factors	21.2	29.5	11.3	5.1	0	0	0	0	0	0	0	0	8	8.5	12.4	12.2	1.1	0	57.6	45.3	3.2	4.4	40.3	31.1
CLST001123 hypothetical protein	0	0	0	0	0.9	0	0	0	0	0	0	0	0	0	0	0	0	0	0	0	0	0	0	0
CLST001127 hypothetical protein	0	0	0	0	0	0	0	0	0	0	0	0	0	0	0	0	0	0	0	0	0	0	0	0.9
CLST001149 TIGR:TIGR01049,COG:COG0051,NOG:NOG150024,KEGG:K02946 Annotation not available	0	0	0	0	0	0	0	0	0	0	0	0	0	0	2.1	2	0	0	4.5	10	0	0	1.8	1.8
CLST001201 PFAM:PF00253.14,KEGG:K02954,COG:COG0199 Ribosomal protein S14	0	0	0	0	0	0	0	0	0	0	0	0	0	0	0	0	0	1.1	0	0	0	0	0	0
CLST001235 hypothetical protein	0	0	0	0	0	0	0	0	0	0	0	0	0	0	0	0	0	0	0	0	0	0	1.8	3.6
CLST001471 TIGR:TIGR00981,KEGG:K02950,COG:COG0048 Ribosomal protein S12	4.2	7.1	4.1	3.1	7.2	0	0	0	7.3	11	2.2	0	0	2.1	0	3	2.3	0	5.4	9.1	2.1	3.3	3.6	6.2
CLST001827 hypothetical protein	0	0	0	0	0	0	0	0	0	0	0	0	0	0	0	0	0	0	0	0	0	0	0	0.9
CLST001935 TIGR:TIGR01938,COG:COG1592,KEGG:K00348,PFAM:PF02915.10 Rubrerythrin	63.7	74.4	44.1	37.1	58.2	62.6	62.5	50.5	58.4	60.5	75.7	55.8	80.9	106.8	53.6	51.8	46.2	47.5	99	115	55	53.3	44.8	48.9
CLST002239 COG:COG0459,TIGR:TIGR02348,KEGG:K04077 Chaperonin GroEL (HSP60 family)	0	0	0	0	0	0	0	0	0	0	0	0	0	0	0	1	0	0	0	0	0	0	0	0
CLST002381 PFAM:PF06316.4,COG:COG3637,KEGG:K11934 Opacity protein and related surface antigens	0	0	0	0	0	0	0	0	0	0	0	0	0	0	0	0	6.8	4.2	0	0	0	0	0	0
CLST002382 COG:COG0185,TIGR:TIGR01050,KEGG:K02965 Ribosomal protein S19	0	2.4	0	2.1	0	0	0	0	0	0	0	0	0	0	0	0	0	0	7.2	2.7	0	0	4.5	5.3
CLST002489 KEGG:K02867,COG:COG0080,TIGR:TIGR01632 Ribosomal protein L11	9.6	11.8	11.3	7.2	0	0	0	0	0	0	3.3	3.3	0	0	12.4	15.2	2.3	0	10.8	13.6	7.4	6.5	14.3	11.6
CLST002546 KEGG:K03046,COG:COG0086,TIGR:TIGR02388,TIGR:TIGR02386 DNA-directed RNA polymerase, beta subunit/160 kD subunit	22.3	24.8	3.1	1	0	0	0	0	0	0.9	0	0	0	0	4.1	4.1	0	0	15.3	15.4	0	0	10.8	9.8
CLST002554 TIGR:TIGR00855,COG:COG0222,KEGG:K02935 Ribosomal protein L7/L12	8.5	10.6	3.1	2.1	0	0	0	0	0	0	0	0	2	1.1	22.7	19.3	1.1	0	36	22.6	20.1	25	17.9	28.5
CLST002600 PFAM:PF01808.11,KEGG:K01492,TIGR:TIGR00355,COG:COG0138 AICAR transformylase/IMP cyclohydrolase PurH (only IMP cyclohydrolase domain in Aful)	0	0	11.3	10.3	0.9	1.8	3	4.9	0	0	5.5	2.2	0	0	0	0	0	0	0	3.6	0	0	0	0
CLST002684 TIGR:TIGR01418,COG:COG3605,TIGR:TIGR01828,KEGG:K01006,COG:COG0574 Phosphoenolpyruvate synthase/pyruvate phosphate dikinase	3.2	2.4	0	1	0	0	0	0	0	0	0	1.1	4	0	3.1	3	0	0	12.6	15.4	0	0	8.1	11.6
CLST002694 COG:COG1089,TIGR:TIGR01472,KEGG:K01711 GDP-D-mannose dehydratase	0	0	3.1	3.1	0	0	0	0	0	0	0	0	0	0	0	0	0	0	0	1.8	0	0	0	0
CLST002803 PFAM:PF00253.14,KEGG:K02954,COG:COG0199 Ribosomal protein S14	0	0	0	0	0	0	0	0	1.8	1.8	0	0	0	0	0	0	0	0	5.4	8.2	0	0	0	0
CLST002816 COG:COG0479,KEGG:K00240 Succinate dehydrogenase/fumarate reductase, Fe-S protein subunit	14.9	14.2	15.4	16.5	0	0	0	0	0	0	0	0	32	52.3	23.7	22.3	16.9	17.9	11.7	13.6	67.7	57.6	9.9	4.4
CLST002979 PFAM:PF07498.5,TIGR:TIGR00767,PFAM:PF07497.5,COG:COG1158,KEGG:K03628 Transcription termination factor	3.2	3.5	0	0	0	0	0	0	0	0	0	0	0	0	0	0	0	0	0	0	0	0	1.8	1.8
CLST003055 PFAM:PF03435.11,COG:COG1748,KEGG:K00290 Saccharopine dehydrogenase and related proteins	0	0	0	0	0	0	0	0	0	0	0	0	0	0	0	0	0	0	5.4	3.6	0	0	1.8	0
CLST003058 KEGG:K04043,COG:COG0443,TIGR:TIGR02350 Molecular chaperone	19.1	15.3	4.1	2.1	0	0	0	0	2.7	2.7	0	0	0	0	1	1	0	0	18.9	12.7	0	0	14.3	15.1
CLST003062 NOG:NOG113532,COG:COG0238,TIGR:TIGR00165,KEGG:K02963,PFAM:PF01084.13 Rrna binding protein	0	0	0	0	0	0	0	0	0	0	0	0	0	0	0	0	0	0	2.7	4.5	0	0	1.8	0
CLST003095 KEGG:K02982,COG:COG0092,TIGR:TIGR01009 Ribosomal protein S3	10.6	0	0	0	0	0	0	0	0	0	0	0	0	0	0	0	0	0	8.1	8.2	0	0	5.4	4.4
CLST003109 COG:COG0459,TIGR:TIGR02348,KEGG:K04077 Chaperonin GroEL (HSP60 family)	35	24.8	11.3	10.3	0	0	0	0	0	0	0	0	0	3.2	18.6	23.3	0	0	24.3	22.6	8.5	6.5	49.3	40
CLST003126 TIGR:TIGR02012,KEGG:K03553,COG:COG0468 RecA/RadA recombinase	3.2	2.4	1	0	0	0	0	0	0	0	0	0	0	0	0	0	0	0	0.9	1.8	0	0	0	0
CLST003128 COG:COG0094,PFAM:PF00673.14,PFAM:PF00281.12,KEGG:K02931 Ribosomal protein L5	0	0	0	2.1	0	0	0	0	0	0	0	0	0	0	2.1	0	0	0	4.5	1.8	0	0	2.7	3.6
CLST003160 TIGR:TIGR01067,KEGG:K02874,COG:COG0093 Ribosomal protein L14	0	0	0	1	0	0	0	0	0	0	0	0	0	0	2.1	2	0	0	1.8	2.7	0	0	0	0
CLST003197 TIGR:TIGR03631,NOG:NOG125662,COG:COG0099,TIGR:TIGR03629,KEGG:K02952 Annotation not available	0	0	0	0	0	0	0	0	0	0	0	0	0	0	5.2	2	0	0	1.8	2.7	0	0	2.7	5.3
CLST003207 KEGG:K02906,TIGR:TIGR03625,COG:COG0087,NOG:NOG114031 Ribosomal protein L3	3.2	3.5	2	2.1	0	0	0	0	0	0	0	0	0	0	0	0	0	0	3.6	3.6	0	0	2.7	1.8
CLST003215 KEGG:K02994,NOG:NOG134092,PFAM:PF00410.12,COG:COG0096 Annotation not available	3.2	0	3.1	0	0	0	0	0	0	0	0	0	0	0	9.3	6.1	0	0	7.2	3.6	0	0	2.7	1.8
CLST003218 TIGR:TIGR01169,COG:COG0081,KEGG:K02863,NOG:NOG131359 Protein involved in regulation of translation	0	2.4	2	3.1	0	0	0	0	0	0	0	0	0	0	0	0	0	0	6.3	12.7	0	0	7.2	6.2
CLST003224 KEGG:K02887,TIGR:TIGR01032,COG:COG0292 Ribosomal protein L20	0	2.4	0	0	0	0	0	0	0	0	0	0	0	0	0	0	0	0	2.7	3.6	0	0	0	0.9
CLST003234 KEGG:K01880,COG:COG0423,TIGR:TIGR00389 Glycyl-tRNA synthetase (class II)	0	0	1	0	0	0	0	0	0	0	0	0	0	0	0	0	0	0	3.6	3.6	0	0	0	0
CLST003236 TIGR:TIGR01251,COG:COG0462,KEGG:K00948 Phosphoribosylpyrophosphate synthetase	3.2	2.4	0	0	0	0	0	0	5.5	2.7	0	0	0	0	0	0	0	0	0	0	0	0	8.1	6.2
CLST003239 PFAM:PF00464.12,KEGG:K00600,COG:COG0112 Glycine/serine hydroxymethyltransferase	2.1	2.4	2	0	0	0	0	0	0	0	0	0	0	0	0	0	0	0	1.8	3.6	2.1	3.3	0	2.7
CLST003248 TIGR:TIGR01024,COG:COG0335,KEGG:K02884 Ribosomal protein L19	2.1	0	0	0	0	0	0	0	0	0	0	0	0	0	0	0	0	0	3.6	2.7	0	0	4.5	5.3
CLST003251 PFAM:PF00166.14,COG:COG0234,KEGG:K04078 Co-chaperonin GroES (HSP10)	5.3	4.7	0	2.1	0	0	0	0	0	0	0	0	0	0	3.1	3	0	0	0.9	4.5	3.2	5.4	5.4	6.2
CLST003280 TIGR:TIGR01811,COG:COG1053,KEGG:K00239 Succinate dehydrogenase/fumarate reductase, flavoprotein subunit	45.6	61.4	34.8	25.7	0	0	0	0	6.4	4.6	0	0	51	56.6	56.7	45.7	39.4	31.7	38.7	39.8	83.6	74	16.1	14.2
CLST003282 COG:COG0148,KEGG:K01689,TIGR:TIGR01060 Enolase	36.1	35.4	5.1	4.1	0	0	0	0	0	0	0	0	0	2.1	9.3	8.1	0	0	6.3	6.3	3.2	4.4	8.1	11.6
CLST003298 TIGR:TIGR02013,COG:COG0085,KEGG:K03043,PFAM:PF00562.21 DNA-directed RNA polymerase, beta subunit/140 kD subunit	21.2	24.8	4.1	5.1	0	0	0	0	0	0	0	1.1	0	0	2.1	0	2.3	1.1	18.9	25.4	0	0	17.9	10.7
CLST003321 TIGR:TIGR01029,COG:COG0049,NOG:NOG119805,KEGG:K02992 Annotation not available	0	2.4	0	0	0	0	0	0	0	0	0	0	0	0	2.1	0	0	0	4.5	9.1	0	0	4.5	4.4
CLST003324 KEGG:K02886,TIGR:TIGR01171,COG:COG0090 Ribosomal protein L2	0	0	2	0	0	0	0	0	0	0	0	0	0	0	0	3	0	0	1.8	3.6	0	0	2.7	2.7
CLST003331 COG:COG0103,KEGG:K02996,TIGR:TIGR03627,PFAM:PF00380.12 Ribosomal protein S9	0	5.9	0	0	0	0	0	0	0	0	0	0	0	0	0	0	0	0	0	5.4	0	0	3.6	5.3
CLST003335 TIGR:TIGR01394,COG:COG0480,TIGR:TIGR00484,KEGG:K02355 Translation elongation factors (GTPases)	4.2	9.4	1	0	8.1	10	0	0	0	0	0	0	0	0	4.1	3	0	0	16.2	14.5	1.1	0	9	4.4
CLST003337 COG:COG0052,TIGR:TIGR01011,KEGG:K02967 Ribosomal protein S2	0	3.5	2	5.1	0	0	0	0	0	0	0	0	0	0	0	3	0	0	19.8	23.5	0	0	6.3	5.3
CLST003346 TIGR:TIGR01017,KEGG:K02986,COG:COG0522 Ribosomal protein S4 and related proteins	2.1	3.5	0	2.1	0	0	0	0	0	0	0	0	0	0	11.3	2	0	0	5.4	3.6	0	0	7.2	1.8
CLST003348 KEGG:K01955,COG:COG0458,PFAM:PF02786.10,TIGR:TIGR01369 Carbamoylphosphate synthase large subunit (split gene in MJ)	0	1.2	0	0	0	0	0	0	0	0	0	0	0	0	1	2	0	0	0	0	0	0	0	0
CLST003352 TIGR:TIGR00717,PFAM:PF00575.16,COG:COG0539,KEGG:K02945 Ribosomal protein S1	7.4	3.5	2	0	0	0	0	0	0	0	0	0	0	0	0	0	0	0	13.5	4.5	0	0	8.1	6.2
CLST003365 NOG:NOG125984,TIGR:TIGR03496,COG:COG0055,KEGG:K02112,TIGR:TIGR01039 ATP synthase	10.6	7.1	10.2	4.1	0	0	0	0	0	0	0	0	0	2.1	23.7	14.2	5.6	6.3	6.3	10	0	0	15.2	12.5
CLST003395 KEGG:K00525,COG:COG0209,TIGR:TIGR02504 Ribonucleotide reductase, alpha subunit	5.3	0	0	0	0	0	0	0	0	0	0	0	0	0	0	0	0	0	1.8	2.7	0	0	0	0
CLST003527 TIGR:TIGR00485,COG:COG0050,KEGG:K02358 GTPases - translation elongation factors	2.1	0	6.1	13.4	0.9	0	0	0	0	0	0	0	1	1.1	2.1	2	0	0	0	0	16.9	12	5.4	11.6
CLST003596 TIGR:TIGR01859,COG:COG0191,KEGG:K01624 Fructose/tagatose bisphosphate aldolase	9.6	10.6	2	2.1	0	0	0	0	0	0	0	0	0	0	0	0	0	0	16.2	17.2	0	0	15.2	9.8
CLST003605 PFAM:PF00128.17,COG:COG0296,PFAM:PF02806.11,TIGR:TIGR02104,TIGR:TIGR02402,KEGG:K00700,TIGR:TIGR01515 1,4-alpha-glucan branching enzyme	0	0	0	0	0	0	0	0	0	0	0	0	0	0	0	0	0	0	1.8	0	0	0	0	0
CLST003636 TIGR:TIGR02154,KEGG:K07665,KEGG:K07668,COG:COG0745,TIGR:TIGR03787,KEGG:K07662 Response regulators consisting of a CheY-like receiver domain and a winged-helix DNA-binding domain	2.1	2.4	0	0	0	0	0	0	0	0	0	0	0	0	0	2	0	0	9.9	8.2	0	0	2.7	4.4
CLST003644 COG:COG0172,PFAM:PF02403.15,KEGG:K01875,TIGR:TIGR00414 Seryl-tRNA synthetase	2.1	0	3.1	4.1	7.2	2.7	1	0	0	0	0	2.2	0	0	0	0	0	0	5.4	5.4	0	0	2.7	3.6
CLST003653 KEGG:K03040,TIGR:TIGR02027,COG:COG0202 DNA-directed RNA polymerase, alpha subunit/40 kD subunit	3.2	7.1	3.1	0	0	0	0	0	2.7	2.7	0	0	0	0	0	0	0	0	9.9	10	0	0	10.8	8.9
CLST003692 COG:COG0517,KEGG:K00088,COG:COG0516,TIGR:TIGR01302 IMP dehydrogenase/GMP reductase	14.9	9.4	9.2	7.2	0	0	0	0	0	0	0	0	0	0	16.5	13.2	0	0	5.4	6.3	16.9	16.3	10.8	8
CLST003894 TIGR:TIGR01821,TIGR:TIGR01822,KEGG:K00639,COG:COG0156 7-keto-8-aminopelargonate synthetase and related enzymes	2.1	0	2	0	0	0	0	0	0	0	0	0	0	0	0	0	0	0	2.7	8.2	0	0	3.6	0
CLST003928 COG:COG0361,TIGR:TIGR00008,KEGG:K02518 Translation initiation factor 1 (IF-1)	0	0	2	0	0	0	0	0	0	0	0	0	0	0	0	0	0	0	0	0	0	0	0	0
CLST003992 TIGR:TIGR01830,KEGG:K00059,COG:COG1028 Dehydrogenases with different specificities (related to short-chain alcohol dehydrogenases)	0	0	0	0	0	0	0	0	0	0	0	0	0	0	0	0	0	0	1.8	3.6	0	0	0	0.9
CLST004773 TIGR:TIGR03316,COG:COG0078 Ornithine carbamoyltransferase	7.4	4.7	3.1	2.1	0	1.8	0	0	4.6	0.9	2.2	7.8	0	2.1	10.3	10.1	0	2.1	1.8	1.8	0	3.3	0	0
CLST004989 KEGG:K01623,COG:COG1830 DhnA-type fructose-1,6-bisphosphate aldolase and related enzymes	7.4	2.4	4.1	6.2	0	0	0	0	0	0	0	0	6	8.5	6.2	4.1	0	0	2.7	0	13.7	10.9	5.4	3.6
CLST005054 TIGR:TIGR03630,TIGR:TIGR03635,KEGG:K02961,COG:COG0186,NOG:NOG138354 Ribosomal protein	3.2	0	5.1	0	1.8	2.7	0	0	1.8	0.9	2.2	0	7	6.4	4.1	5.1	3.4	2.1	9.9	7.2	4.2	2.2	3.6	2.7
CLST005146 COG:COG0450,KEGG:K03386,TIGR:TIGR03137 Peroxiredoxin	0	3.5	0	0	0	0	0	0	0	0	0	0	0	0	0	0	0	0	0	0	0	0	5.4	3.6
CLST005189 PFAM:PF01370.14,KEGG:K02377,COG:COG0451 Nucleoside-diphosphate-sugar epimerases	0	0	0	1	0	0	0	0	0	0	0	0	0	0	0	0	0	0	0	0	0	0	0	0
CLST005198 COG:COG0227,PFAM:PF00830.12,KEGG:K02902,TIGR:TIGR00009 Ribosomal protein L28	2.1	0	0	3.1	0	0	0	0	0	0	0	0	0	0	0	0	0	0	0	0	0	0	0	0
CLST005199 COG:COG1217,TIGR:TIGR00231,TIGR:TIGR01393,TIGR:TIGR01394,KEGG:K06207 Predicted membrane GTPase involved in stress response	1.1	0	0	0	0	0	0	0	0	0	0	0	0	0	0	0	0	0	1.8	2.7	0	0	0	0
CLST005254 KEGG:K09157,PFAM:PF05167.5,COG:COG2848 Uncharacterized conserved protein	0	5.9	3.1	3.1	0	0	0	2	0	0	7.7	6.7	0	5.3	6.2	7.1	2.3	2.1	1.8	0	0	0	0	0
CLST005262 KEGG:K01358,COG:COG0740,TIGR:TIGR00493 Protease subunit of ATP-dependent Clp proteases	3.2	0	0	0	0	0	0	0	0	0	0	0	0	0	0	0	0	0	0	0	4.2	4.4	0	0
CLST005279 COG:COG3716,TIGR:TIGR00828,KEGG:K02796 Phosphotransferase system, mannose/fructose/N-acetylgalactosamine-specific component IID	0	0	0	0	2.7	2.7	0	0	0	0	0	0	0	0	0	0	0	0	1.8	0	3.2	0	0	0.9
CLST005286 KEGG:K00262,PFAM:PF02812.11,COG:COG0334,PFAM:PF00208.14 Glutamate dehydrogenase/leucine dehydrogenase	8.5	5.9	8.2	3.1	0	0	0	0	2.7	2.7	0	0	9	5.3	5.2	10.1	0	0	18	17.2	6.3	8.7	3.6	2.7
CLST005342 TIGR:TIGR01164,KEGG:K02878,COG:COG0197 Ribosomal protein L16/L10E	3.2	0	0	4.1	0	0	0	0	0	0	0	0	0	0	0	0	0	0	4.5	5.4	0	0	4.5	3.6
CLST005345 KEGG:K02913,PFAM:PF00471.13,COG:COG0267 Ribosomal protein L33	0	0	0	0	0	0	0	0	0	0	0	0	0	4.3	0	0	0	0	0	0	2.1	4.4	0	0
CLST005348 COG:COG0008,KEGG:K01885,TIGR:TIGR00464 Glutamyl- and glutaminyl-tRNA synthetases	0	0	2	0	0	0	0	0	0	0	0	0	0	0	0	0	0	0	1.8	3.6	0	0	0	0
CLST005386 COG:COG0188,TIGR:TIGR01061,KEGG:K02469,TIGR:TIGR01063 Type IIA topoisomerase (DNA gyrase/topo II, topoisomerase IV), A subunit	2.1	0	0	3.1	0	0	0	0	0	0	0	0	0	0	0	0	0	0	0	0	0	0	0	0
CLST005426 KEGG:K01687,TIGR:TIGR00110,COG:COG0129,TIGR:TIGR01196 Dihydroxyacid dehydratase/phosphogluconate dehydratase	5.3	5.9	5.1	8.2	0	0	4	0	0	0	4.4	6.7	4	5.3	0	0	3.4	2.1	0	1.8	0	0	0.9	1.8
CLST005448 KEGG:K02886,TIGR:TIGR01171,COG:COG0090 Ribosomal protein L2	11.7	10.6	7.2	5.1	4.5	0	0	0	8.2	7.3	4.4	2.2	9	5.3	3.1	2	5.6	3.2	14.4	8.2	5.3	9.8	5.4	6.2
CLST005480 KEGG:K01868,TIGR:TIGR00418,COG:COG0441 Threonyl-tRNA synthetase	0	0	0	0	0	0	0	0	0	0	0	0	0	0	0	0	0	0	2.7	2.7	0	0	1.8	1.8
CLST005495 TIGR:TIGR00855,COG:COG0222,KEGG:K02935 Ribosomal protein L7/L12	0	1.2	0	0	0	0	0	0	0	0	0	0	0	1.1	0	0	0	0	0	0	16.9	10.9	0	0
CLST005502 PFAM:PF00121.11,TIGR:TIGR00419,KEGG:K01803,NOG:NOG43639,COG:COG0149 Annotation not available	3.2	0	4.1	3.1	0	0	0	0	0	0	0	0	1	0	1	1	0	0	1.8	4.5	0	1.1	1.8	3.6
CLST005531 TIGR:TIGR01859,COG:COG0191,KEGG:K01624 Fructose/tagatose bisphosphate aldolase	35	37.8	35.9	45.3	34	39.9	22.2	14.8	14.6	14.7	46.1	30.1	25	29.9	19.6	21.3	31.5	24.3	68.4	71.5	10.6	16.3	34.1	26.7
CLST005542 COG:COG0057,TIGR:TIGR01534,KEGG:K00134 Glyceraldehyde-3-phosphate dehydrogenase/erythrose-4-phosphate dehydrogenase	51	60.2	45.1	35	0	0	0	0	0	0	1.1	2.2	11	12.8	29.9	39.6	3.4	0	77.4	70.6	69.8	79.4	51.1	47.2
CLST005551 PFAM:PF05681.7,KEGG:K01676,PFAM:PF05683.5,COG:COG1838,COG:COG1951 Tartrate dehydratase beta subunit/Fumarate hydratase class I, C-terminal domain	4.2	3.5	0	0	0	0	0	0	0	0	0	0	0	0	2.1	0	0	0	2.7	4.5	0	0	2.7	2.7
CLST005559 KEGG:K02970,PFAM:PF01165.13,COG:COG0828,TIGR:TIGR00030 Ribosomal protein S21	2.1	0	0	2.1	0	0	0	0	1.8	0	0	0	0	0	0	0	0	0	0	0	0	0	0	0
CLST005577 PFAM:PF00004.22,TIGR:TIGR03346,COG:COG0542,KEGG:K04086,TIGR:TIGR02639,PFAM:PF07728.7 ATPases with chaperone activity, ATP-binding subunit	0	0	0	0	0	0	0	0	0	0	0	0	0	0	0	0	0	0	0	0	5.3	0	0	0
CLST005608 TIGR:TIGR00465,COG:COG0059,PFAM:PF01450.12,KEGG:K00053 Ketol-acid reductoisomerase	0	0	0	0	0	0	0	0	0	0	0	0	0	0	0	0	0	0	0	2.7	0	0	0	0
CLST005618 TIGR:TIGR00465,COG:COG0059,PFAM:PF01450.12,PFAM:PF07991.5,KEGG:K00053 Ketol-acid reductoisomerase	29.7	43.7	63.5	56.6	28.7	25.4	28.2	25.7	12.8	11	46.1	58	23	28.8	20.6	18.3	6.8	14.8	44.1	41.7	13.7	19.6	25.1	23.1
CLST005622 TIGR:TIGR00641,PFAM:PF01642.15,COG:COG2185,KEGG:K01847,TIGR:TIGR00640,COG:COG1884 Methylmalonyl-CoA mutase, N-terminal domain/subunit	2.1	4.7	5.1	5.1	0	0	0	0	0	0	0	0	0	0	2.1	0	0	0	0	0	0	0	0	0
CLST005625 COG:COG0172,KEGG:K01875,TIGR:TIGR00414 Seryl-tRNA synthetase	3.2	0	3.1	3.1	0	0	0	0	0	0	0	0	0	0	3.1	2	0	0	5.4	2.7	2.1	5.4	0	1.8
CLST005626 PFAM:PF03725.8,COG:COG1185,KEGG:K00962,TIGR:TIGR03591 Polyribonucleotide nucleotidyltransferase (polynucleotide phosphorylase)	7.4	3.5	3.1	4.1	0	0	0	0	0	0	0	0	0	0	2.1	5.1	0	0	3.6	4.5	12.7	10.9	0.9	3.6
CLST005628 KEGG:K02988,TIGR:TIGR01021,COG:COG0098 Ribosomal protein S5	0	0	0	0	0	0	0	0	0	0	0	0	0	0	0	0	0	0	2.7	2.7	0	0	1.8	2.7
CLST005635 KEGG:K00849,COG:COG0153,TIGR:TIGR00131,PFAM:PF10509.2 Galactokinase	0	3.5	3.1	0	0	0	0	0	0	0	0	0	0	0	0	0	0	0	9	11.8	0	0	4.5	5.3
CLST005643 KEGG:K02990,COG:COG0360,NOG:NOG113591,PFAM:PF01250.10 Ribosomal protein	0	2.4	0	0	0	0	0	0	0	0	0	0	0	0	0	0	0	0	4.5	4.5	0	0	1.8	0
CLST005644 COG:COG4864,PFAM:PF12127.1 Uncharacterized protein conserved in bacteria	4.2	7.1	0	0	0	0	0	0	0	0	0	0	0	0	0	0	3.4	3.2	6.3	4.5	0	0	6.3	5.3
CLST005650 TIGR:TIGR01859,COG:COG0191,KEGG:K01624 Fructose/tagatose bisphosphate aldolase	0	0	0	0	0	0	0	0	0	0	0	0	0	0	0	0	0	0	0	0	4.2	4.4	0.9	0.9
CLST005661 KEGG:K02118,TIGR:TIGR01040,COG:COG1156,TIGR:TIGR01041 Archaeal/vacuolar-type H+-ATPase subunit B	0	3.5	0	0	0	0	0	0	0	0	0	0	0	0	0	0	3.4	0	3.6	1.8	0	0	1.8	0
CLST005666 COG:COG0459,TIGR:TIGR02348,KEGG:K04077 Chaperonin GroEL (HSP60 family)	141.2	162.9	108.6	84.4	42.1	39.9	61.5	32.7	65.7	66	82.2	112.7	168.9	221.1	95.9	76.1	38.3	25.3	93.6	90.6	48.7	44.6	46.6	35.6
CLST005669 TIGR:TIGR03631,COG:COG0099,KEGG:K02952 Ribosomal protein S13	2.1	0	0	0	3.6	7.3	0	0	1.8	0	6.6	7.8	0	0	0	0	4.5	6.3	0	0	0	0	0	2.7
CLST005670 TIGR:TIGR01043,KEGG:K02117,COG:COG1155 Archaeal/vacuolar-type H+-ATPase subunit A	5.3	2.4	2	0	0	0	0	0	0	0	0	0	0	0	4.1	3	5.6	0	5.4	4.5	0	0	0.9	1.8
CLST005671 TIGR:TIGR00059,KEGG:K02879,COG:COG0203 Ribosomal protein L17	0	0	0	0	0	0	0	0	0	0	0	0	2	0	0	0	0	0	0	0	0	0	0	0
CLST005673 TIGR:TIGR02013,COG:COG0085,KEGG:K03043,PFAM:PF04561.7 DNA-directed RNA polymerase, beta subunit/140 kD subunit	0	0	0	0	0	0	0	1	0	0	0	0	0	0	0	0	0	0	0.9	0.9	0	0	0	0
CLST005681 COG:COG0150,KEGG:K01933,TIGR:TIGR00878 Phosphoribosylaminoimidazole (AIR) synthetase	2.1	0	3.1	5.1	0	0	0	0	0	0	0	0	0	0	0	0	0	0	0	4.5	0	0	0	0
CLST005685 COG:COG0205,KEGG:K00850,TIGR:TIGR02482 6-phosphofructokinase	0	0	0	0	0	0	0	0	0	0	0	0	0	0	0	0	0	0	0	0	0	0	0	0.9
CLST005687 COG:COG0136,KEGG:K00133,TIGR:TIGR01296,TIGR:TIGR00978 Aspartate-semialdehyde dehydrogenase	0	0	0	2.1	0	0	0	0	0	0	0	0	0	0	3.1	0	0	0	0	0	0	0	0	0
CLST005689 TIGR:TIGR01044,KEGG:K02890,COG:COG0091 Ribosomal protein L22	0	0	0	0	0	0	0	0	0	0	0	0	0	0	0	0	0	0	4.5	3.6	0	0	0	0
CLST005694 COG:COG0261,KEGG:K02888,TIGR:TIGR00061 Ribosomal protein L21	2.1	0	0	0	0	0	0	0	0	0	0	0	0	0	0	0	0	0	0	0	0	0	0	0
CLST005695 COG:COG1932,TIGR:TIGR01364,KEGG:K00831 Phosphoserine aminotransferase	4.2	3.5	16.4	19.6	7.2	5.4	2	0	0	0	2.2	4.5	0	2.1	0	1	9	5.3	18	20.8	0	0	6.3	7.1
CLST005699 KEGG:K01876,TIGR:TIGR00459,COG:COG0173,COG:COG0017 Aspartyl-tRNA synthetase	0	0	0	0	1.8	0	0	0	0	0	0	0	0	0	0	0	0	0	1.8	2.7	0	0	1.8	0
CLST005706 KEGG:K01880,COG:COG0423,TIGR:TIGR00389 Glycyl-tRNA synthetase (class II)	3.2	2.4	1	4.1	0.9	0.9	0	2	0	0	2.2	2.2	1	2.1	0	2	3.4	2.1	3.6	3.6	0	0	2.7	2.7
CLST005714 KEGG:K10112,TIGR:TIGR01187,COG:COG3839 ABC-type sugar transport systems, ATPase components	0	2.4	0	0	0	0	0	0	0	0	0	0	0	0	0	0	0	0	0	0	0	0	0	0
CLST005732 KEGG:K00615,TIGR:TIGR00232,COG:COG0021 Transketolase	9.6	5.9	2	3.1	0	0	0	0	0	0	0	0	0	0	0	0	0	0	10.8	13.6	0	0	1.8	2.7
CLST005733 KEGG:K01649,TIGR:TIGR02090,NOG:NOG138287,TIGR:TIGR00973,COG:COG0119,PFAM:PF08502.3 2-Isopropylmalate synthase	0	0	0	0	0	0	0	0	0	0	0	0	0	0	0	0	0	0	2.7	0	0	0	0	0
CLST005737 NOG:NOG43717 Annotation not available	0	0	0	0	0	0	0	0	0	0	0	0	0	0	0	0	0	0	0	0	2.1	0	0	0
CLST005756 COG:COG0039,TIGR:TIGR01771,KEGG:K00016 Malate/lactate dehydrogenases	0	0	0	0	0	0	0	0	0	0	0	0	0	0	0	0	0	0	0	0	0	3.3	0	0
CLST005764 PFAM:PF00121.11,KEGG:K01803,COG:COG0149 Triosephosphate isomerase	0	0	0	0	0	0	0	2	0	0	0	0	0	0	0	0	0	0	0	0	0	0	0	0
CLST005780 TIGR:TIGR03631,PFAM:PF00416.15,COG:COG0099,KEGG:K02952 Ribosomal protein S13	6.4	3.5	3.1	1	9.9	11.8	0	0	6.4	12.8	5.5	3.3	8	7.5	3.1	4.1	3.4	2.1	11.7	9.1	2.1	3.3	9.9	8.9
CLST005782 KEGG:K01603,TIGR:TIGR01117,KEGG:K01966,COG:COG4799 Acetyl-CoA carboxylase, carboxyltransferase component (subunits alpha and beta)	18	20.1	8.2	9.3	0	0	0	0	0	0	0	0	0	2.1	16.5	17.3	0	0	12.6	18.1	3.2	9.8	7.2	4.4
CLST005786 TIGR:TIGR01104,PFAM:PF03030.9,COG:COG3808,KEGG:K01507 Inorganic pyrophosphatase	7.4	2.4	0	0	0	0	0	0	0	0	0	0	0	0	0	0	0	0	0	0	0	0	0	0
CLST005794 PFAM:PF09180.4,COG:COG0442,TIGR:TIGR00408,KEGG:K01881 Prolyl-tRNA synthetase	2.1	0	0	0	0	0	0	0	0	0	0	0	0	0	0	0	0	0	1.8	2.7	0	0	0	0
CLST005795 KEGG:K04567,COG:COG1190,TIGR:TIGR00499 Lysyl-tRNA synthetase (class II)	0	0	0	0	0	0	0	0	0	0	0	0	0	0	0	0	0	0	1.8	0	0	0	0	0
CLST005801 KEGG:K00262,PFAM:PF02812.11,COG:COG0334,PFAM:PF00208.14 Glutamate dehydrogenase/leucine dehydrogenase	32.9	40.1	23.6	23.7	0	0	0	0	12.8	3.7	0	0	23	17.1	25.8	19.3	3.4	2.1	18.9	18.1	37	28.3	21.5	19.6
CLST005804 COG:COG0094,PFAM:PF00673.14,PFAM:PF00281.12,KEGG:K02931 Ribosomal protein L5	29.7	20.1	26.6	17.5	19.7	18.1	14.1	0	16.4	15.6	21.9	19	18	16	20.6	19.3	12.4	13.7	50.4	43.5	19	14.1	12.6	16
CLST005811 KEGG:K01940,TIGR:TIGR00032,COG:COG0137 Argininosuccinate synthase	0	2.4	0	0	0	0	0	0	0	0	0	0	0	0	0	0	0	0	1.8	1.8	0	0	2.7	1.8
CLST005825 TIGR:TIGR00855,COG:COG0222,KEGG:K02935 Ribosomal protein L7/L12	40.3	30.7	34.8	31.9	12.5	18.1	18.1	10.9	29.2	28.4	45	37.9	40	76.9	57.7	59.9	39.4	30.6	54	48.9	41.2	34.8	25.1	25.8
CLST005840 PFAM:PF02787.12,KEGG:K01955,COG:COG0458,PFAM:PF02786.10,PFAM:PF00289.15,TIGR:TIGR01369 Carbamoylphosphate synthase large subunit (split gene in MJ)	1.1	7.1	7.2	0	0	0	0	0	0	0	0	0	0	0	2.1	0	0	0	3.6	5.4	0	0	6.3	7.1
CLST005841 TIGR:TIGR01044,KEGG:K02890,COG:COG0091 Ribosomal protein L22	0	15.3	10.2	8.2	7.2	6.3	3	0	5.5	12.8	2.2	0	14	8.5	11.3	5.1	0	0	9.9	10	0	0	9.9	8.9
CLST005842 PFAM:PF04560.13,TIGR:TIGR02013,COG:COG0085,PFAM:PF10385.2,PFAM:PF04565.9,KEGG:K03043,PFAM:PF00562.21,PFAM:PF04561.7,TIGR:TIGR03670 DNA-directed RNA polymerase, beta subunit/140 kD subunit	9.6	13	33.8	22.7	7.2	12.7	7.1	4	5.5	2.7	8.8	11.2	5	11.7	9.3	11.2	9	4.2	18.9	28.1	0	2.2	7.2	8
CLST005863 TIGR:TIGR01169,COG:COG0081,KEGG:K02863 Ribosomal protein L1	0	0	0	0	0	0	1	0	0	0	0	0	0	0	0	0	0	0	0	0	0	0	0	0
CLST005865 TIGR:TIGR01029,COG:COG0049,KEGG:K02992 Ribosomal protein S7	17	26	18.4	14.4	16.1	9.1	6	2	10	11.9	7.7	8.9	13	27.8	17.5	18.3	12.4	19	35.1	34.4	11.6	10.9	19.7	14.2
CLST005872 COG:COG0052,TIGR:TIGR01011,KEGG:K02967 Ribosomal protein S2	11.7	15.3	7.2	8.2	9.9	11.8	6	0	4.6	8.2	4.4	3.3	6	9.6	14.4	14.2	7.9	3.2	17.1	13.6	0	6.5	17.9	4.4
CLST005881 TIGR:TIGR01164,KEGG:K02878,COG:COG0197 Ribosomal protein L16/L10E	2.1	0	2	2.1	0	0	0	0	0	1.8	0	0	0	0	0	0	0	0	6.3	12.7	0	2.2	0	0
CLST005883 KEGG:K00874,COG:COG0524 Sugar kinases, ribokinase family	2.1	0	4.1	3.1	0	0	0	0	0	0	0	0	0	2.1	0	5.1	0	0	3.6	3.6	11.6	8.7	0	0
CLST005894 TIGR:TIGR02177,KEGG:K00175,COG:COG1013 Pyruvate:ferredoxin oxidoreductase and related 2-oxoacid:ferredoxin oxidoreductases, beta subunit	4.2	0	2	0	0	0	0	0	0	0	0	0	0	0	0	0	0	0	1.8	2.7	0	0	1.8	0
CLST005913 COG:COG0205,KEGG:K00895,TIGR:TIGR02477 6-phosphofructokinase	4.2	3.5	4.1	5.1	0	0	0	0	2.7	4.6	0	0	0	0	0	5.1	0	0	6.3	2.7	6.3	6.5	4.5	8.9
CLST005915 KEGG:K04043,COG:COG0443,TIGR:TIGR02350 Molecular chaperone	47.8	59	37.9	31.9	15.2	14.5	26.2	12.9	17.3	24.7	27.4	29	61	72.6	47.4	41.6	12.4	16.9	43.2	29.9	9.5	9.8	14.3	10.7
CLST005929 COG:COG0185,TIGR:TIGR01050,KEGG:K02965 Ribosomal protein S19	14.9	8.3	5.1	6.2	7.2	6.3	2	4.9	15.5	11	7.7	5.6	10	16	8.2	9.1	5.6	3.2	15.3	8.2	9.5	7.6	7.2	0.9
CLST005939 TIGR:TIGR01064,COG:COG0469,PFAM:PF00224.14,KEGG:K00873 Pyruvate kinase	0	0	0	4.1	0	0	0	0	0	0	0	0	0	0	0	0	0	0	0	0	10.6	9.8	0	0
CLST005950 TIGR:TIGR03319,KEGG:K06950,COG:COG1418 Predicted HD superfamily hydrolase	0	2.4	1	2.1	0	0	0	0	0	0	0	0	0	0	0	0	0	0	4.5	4.5	0	0	0.9	3.6
CLST005962 TIGR:TIGR03451,TIGR:TIGR02824,TIGR:TIGR02818,KEGG:K00008,TIGR:TIGR00692,COG:COG1063 Threonine dehydrogenase and related Zn-dependent dehydrogenases	0	0	4.1	8.2	0	0	4	0	0	0	2.2	2.2	0	0	0	0	0	0	0	2.7	0	0	0	0
CLST005977 COG:COG1592 Rubrerythrin	1.1	2.4	4.1	0	0	0	0	0	0	0	0	0	0	3.2	0	5.1	0	0	9	5.4	7.4	8.7	4.5	5.3
CLST005987 COG:COG0588,TIGR:TIGR01258,KEGG:K01834 Phosphoglycerate mutase 1	0	0	0	2.1	0	0	0	0	0	0	0	0	0	0	0	0	0	0	0	0	0	3.3	0	0
CLST005988 KEGG:K02887,TIGR:TIGR01032,COG:COG0292 Ribosomal protein L20	0	3.5	7.2	5.1	3.6	0	2	0	5.5	11	3.3	0	23	26.7	2.1	2	2.3	0	2.7	5.4	2.1	0	4.5	5.3
CLST005996 KEGG:K02994,COG:COG0096,PFAM:PF00410.12 Ribosomal protein S8	23.4	31.9	23.6	17.5	17	13.6	14.1	10.9	12.8	18.3	13.2	19	30	35.2	21.6	16.2	14.6	14.8	26.1	30.8	10.6	10.9	9	7.1
CLST006000 PFAM:PF00709.14,KEGG:K01939,TIGR:TIGR00184,COG:COG0104 Adenylosuccinate synthase	8.5	10.6	2	2.1	5.4	9.1	0	3	0	1.8	7.7	10	0	0	7.2	3	0	0	7.2	5.4	0	0	2.7	1.8
CLST006044 TIGR:TIGR00160,COG:COG1803,KEGG:K01734 Methylglyoxal synthase	0	0	0	0	0	0	0	0	0	0	0	0	0	0	0	0	0	0	0	0	0	0	0	0.9
CLST006056 COG:COG0203,TIGR:TIGR00059,NOG:NOG117414,KEGG:K02879 Annotation not available	0	0	0	0	0	0	0	0	0	0	0	0	0	0	0	0	0	0	2.7	4.5	0	0	0	0
CLST006057 COG:COG0238,KEGG:K02963,PFAM:PF01084.13 Ribosomal protein S18	0	3.5	2	2.1	6.3	6.3	6	2	8.2	7.3	8.8	15.6	0	0	0	0	12.4	12.7	0	0	0	0	3.6	2.7
CLST006061 TIGR:TIGR01307,COG:COG0696,KEGG:K01834 Phosphoglyceromutase	0	0	0	0	0	0	0	0	0	0	0	0	0	0	2.1	0	0	0	0	0	0	0	0	0
CLST006081 PFAM:PF00342.12,COG:COG0166,KEGG:K01810 Glucose-6-phosphate isomerase	0	0	0	0	0	0	0	0	0	0	0	0	0	0	0	0	0	0	0	0	0	3.3	0	0
CLST006137 KEGG:K01647,COG:COG0372,PFAM:PF00285.14,TIGR:TIGR01800 Citrate synthase	6.4	4.7	0	2.1	0	0	0	0	0	0	0	0	0	0	0	0	0	0	1.8	3.6	0	0	0	0
CLST006170 TIGR:TIGR03627,COG:COG0103,KEGG:K02996,PFAM:PF00380.12 Ribosomal protein S9	19.1	17.7	18.4	13.4	12.5	7.3	4	0	10	6.4	13.2	13.4	9	22.4	16.5	8.1	13.5	10.6	20.7	21.7	5.3	2.2	9	7.1
CLST006180 COG:COG0264,KEGG:K02357,PFAM:PF00889.12,TIGR:TIGR00116 Translation elongation factor Ts	2.1	2.4	0	0	0	0	0	0	0	0	0	0	0	0	0	0	0	0	4.5	4.5	0	0	3.6	4.4
CLST006191 TIGR:TIGR01393,TIGR:TIGR00484,KEGG:K02355,COG:COG0480 Translation elongation factors (GTPases)	41.4	47.2	49.2	42.2	24.2	20.9	13.1	13.9	14.6	15.6	26.3	41.3	25	21.4	20.6	18.3	34.9	27.4	53.1	52.5	8.5	5.4	28.7	24.9
CLST006216 TIGR:TIGR02176,COG:COG1014,KEGG:K03737,COG:COG0674,COG:COG1013 Pyruvate:ferredoxin oxidoreductase and related 2-oxoacid:ferredoxin oxidoreductases, beta subunit	40.3	33	20.5	20.6	0	0	0	0	0	0	0	0	1	1.1	17.5	8.1	0	0	46.8	50.7	6.3	13.1	21.5	17.8
CLST006295 PFAM:PF01808.11,KEGG:K01492,COG:COG0138,KEGG:K00602,TIGR:TIGR00355 AICAR transformylase/IMP cyclohydrolase PurH (only IMP cyclohydrolase domain in Aful)	6.4	4.7	13.3	26.8	1.8	0	0	0	0	0	6.6	8.9	6	3.2	0	3	6.8	7.4	3.6	3.6	0	0	1.8	1.8
CLST006298 TIGR:TIGR01169,COG:COG0081,KEGG:K02863 Ribosomal protein L1	20.2	29.5	16.4	11.3	52	43.5	4	2	11	15.6	32.9	51.3	26	21.4	27.8	28.4	5.6	2.1	62.1	73.4	7.4	10.9	18.8	17.8
CLST006300 KEGG:K01006,TIGR:TIGR01417,TIGR:TIGR01828,COG:COG0574 Phosphoenolpyruvate synthase/pyruvate phosphate dikinase	97.7	122.7	138.3	139	69	67.1	41.3	34.6	27.4	21.1	54.8	78.1	33	36.3	36.1	29.4	39.4	38	229.5	235.5	6.3	6.5	137.2	141.5
CLST006302 COG:COG4443,PFAM:PF09901.2 Uncharacterized protein conserved in bacteria	0	0	0	0	0	0	0	0	0	0	0	0	2	0	0	0	0	0	0	0	0	0	0	0
CLST006307 KEGG:K02990,PFAM:PF01250.10,COG:COG0360 Ribosomal protein S6	0	0	0	0	0	0	0	0	0	0	0	0	0	2.1	0	0	0	0	0	0	0	0	0	0
CLST006308 COG:COG2086,KEGG:K03521 Electron transfer flavoprotein, beta subunit	2.1	7.1	0	2.1	0	0	0	0	0	0	0	0	0	0	0	0	0	0	0	0	0	0	2.7	0.9
CLST006319 PFAM:PF00709.14,KEGG:K01939,TIGR:TIGR00184,COG:COG0104 Adenylosuccinate synthase	0	0	3.1	2.1	0	0	0	0	0	0	0	0	0	0	0	0	0	0	0	1.8	0	0	1.8	0
CLST006361 TIGR:TIGR01830,KEGG:K00046,TIGR:TIGR02415,TIGR:TIGR01832,COG:COG1028 Dehydrogenases with different specificities (related to short-chain alcohol dehydrogenases)	0	0	0	0	0	0	1	0	0	0	0	0	0	0	0	0	0	0	0	0	0	0	0	0
CLST006369 KEGG:K02356,COG:COG0231,TIGR:TIGR00038 Translation elongation factor P (EF-P)/translation initiation factor 5A (eIF-5A)	0	0	0	0	0	0	0	0	0	0	0	0	0	0	0	0	0	0	1.8	0	0	0	0	0
CLST006373 KEGG:K10112,TIGR:TIGR01187,TIGR:TIGR01186,PFAM:PF03459.10,TIGR:TIGR02142,TIGR:TIGR03258,TIGR:TIGR02315,TIGR:TIGR03265,TIGR:TIGR00968,COG:COG3839,TIGR:TIGR03269 ABC-type sugar transport systems, ATPase components	15.9	20.1	42	41.2	2.7	7.3	11.1	1	1.8	6.4	20.8	13.4	17	36.3	16.5	8.1	34.9	24.3	57.6	43.5	3.2	0	18.8	19.6
CLST006374 PFAM:PF00162.12,COG:COG0126,KEGG:K00927 3-phosphoglycerate kinase	0	0	1	1	2.7	0	0	0	0	0	0	0	0	2.1	0	0	0	0	0	0	4.2	8.7	0	0
CLST006375 TIGR:TIGR01235,COG:COG5016,PFAM:PF00364.15,TIGR:TIGR01108,KEGG:K01960,KEGG:K01571,COG:COG0511 Pyruvate/oxaloacetate carboxyltransferase	2.1	2.4	0	0	0	0	0	0	0	0	0	0	0	0	0	0	0	0	2.7	1.8	0	0	0	1.8
CLST006409 COG:COG0052,TIGR:TIGR01011,KEGG:K02967 Ribosomal protein S2	0	0	0	0	0	0	0	0	0	0	0	0	0	0	0	0	0	0	0	0	2.1	4.4	0	0
CLST006421 PFAM:PF03764.11,PFAM:PF00679.17,TIGR:TIGR00484,KEGG:K02355,COG:COG0480,TIGR:TIGR00490 Translation elongation factors (GTPases)	8.5	2.4	0	3.1	0	0	0	0	0	0	0	0	0	0	0	0	0	0	11.7	8.2	0	0	8.1	7.1
CLST006437 COG:COG0111,TIGR:TIGR01327,KEGG:K00058 Phosphoglycerate dehydrogenase and related dehydrogenases	2.1	4.7	2	0	0	0	0	0	0	0	0	0	0	0	0	0	0	0	0	0	8.5	17.4	0	0
CLST006443 TIGR:TIGR01079,COG:COG0198,KEGG:K02895 Ribosomal protein L24	0	0	0	0	0	0	0	0	0	0	0	0	0	0	0	0	0	0	0	0	0	5.4	0	0
CLST006452 KEGG:K02986,COG:COG0522,TIGR:TIGR01017 Ribosomal protein S4 and related proteins	0	1.2	0	0	0	0	0	0	0	0	0	0	0	0	0	0	0	0	0	0	2.1	2.2	0	0
CLST006461 TIGR:TIGR01389,PFAM:PF00570.16,KEGG:K03654,COG:COG0514,TIGR:TIGR00614 Superfamily II DNA helicase	0	0	0	0	0	0	0	0	0	0	0	0	0	0	0	0	0	0	0	1.8	0	0	0	0
CLST006479 COG:COG0291,TIGR:TIGR00001,KEGG:K02916 Ribosomal protein L35	4.2	0	0	0	0	0	0	0	0	0.9	0	0	0	0	0	0	0	0	0	0	0	0	0	0
CLST006499 TIGR:TIGR01308,COG:COG1841,KEGG:K02907 Ribosomal protein L30/L7E	0	0	0	0	0	0	0	0	0	0	0	0	0	0	0	0	0	0	0	0	3.2	0	0	0
CLST006502 TIGR:TIGR00060,COG:COG0256,KEGG:K02881 Ribosomal protein L18	0	0	0	0	0	0	0	0	0	0	0	0	0	0	0	0	0	0	0	0	0	0	3.6	0
CLST006514 PFAM:PF02810.8,KEGG:K03070,TIGR:TIGR00963,COG:COG0653,TIGR:TIGR03714 Preprotein translocase subunit SecA (ATPase, RNA helicase)	0	0	0	0	0	0	0	0	0	0	0	0	0	0	0	1	0	0	0	0	0	0	0	0
CLST006535 COG:COG1918,KEGG:K04758 Fe2+ transport system protein A	0	0	0	0	0	0	0	0	0	0	3.3	4.5	0	0	0	0	0	0	4.5	2.7	0	0	0	0
CLST006543 COG:COG0056,TIGR:TIGR00962,KEGG:K02111 F0F1-type ATP synthase, alpha subunit	2.1	0	0	0	0	0	0	0	0	0	0	0	0	0	1	0	0	0	0	0	0	0	2.7	2.7
CLST006560 KEGG:K02876,NOG:NOG125635,COG:COG0200,TIGR:TIGR01071 Ribosomal protein L15	0	0	0	0	0	0	0	0	0	0	0	0	0	0	0	0	0	0	5.4	10	0	0	0	0
CLST006571 PFAM:PF01037.14,KEGG:K03718,COG:COG1522 Transcriptional regulators	4.2	0	0	5.1	0	0	0	0	0	0	0	0	0	0	0	0	0	0	3.6	5.4	0	0	3.6	1.8
CLST006584 KEGG:K00088,TIGR:TIGR01302,COG:COG0517,COG:COG0516 IMP dehydrogenase/GMP reductase	9.6	16.5	37.9	29.9	8.1	12.7	3	0	6.4	9.2	6.6	17.9	11	17.1	14.4	8.1	15.8	13.7	7.2	11.8	12.7	14.1	2.7	0.9
CLST006586 PFAM:PF01855.12,KEGG:K00174,TIGR:TIGR03710,COG:COG0674 Pyruvate:ferredoxin oxidoreductase and related 2-oxoacid:ferredoxin oxidoreductases, alpha subunit	2.1	0	0	0	0	0	0	0	0	0	0	0	0	0	0	0	0	0	0	0	0	0	2.7	5.3
CLST006587 COG:COG1449,KEGG:K07405 Alpha-amylase/alpha-mannosidase	0	7.1	8.2	7.2	0	0	0	0	0	0	0	0	0	0	5.2	7.1	0	0	2.7	2.7	0	0	0	2.7
CLST006607 KEGG:K06950,COG:COG1418,TIGR:TIGR03319 Predicted HD superfamily hydrolase	0	0	0	0	0	0	0	0	0	0	0	0	0	0	0	0	0	0	0.9	0	0	0	0	0
CLST006639 KEGG:K01358,COG:COG0740,TIGR:TIGR00493 Protease subunit of ATP-dependent Clp proteases	4.2	0	7.2	8.2	0	0	0	0	0	0	0	0	0	0	0	0	4.5	3.2	0	2.7	0	0	0	0
CLST006641 TIGR:TIGR00113,COG:COG0809,KEGG:K07568 S-adenosylmethionine:tRNA-ribosyltransferase-isomerase (queuine synthetase)	0	0	0	0	0	0	0	0	0	0	0	0	0	0	0	0	0	0	1.8	2.7	0	0	0	0
CLST006667 KEGG:K02600,COG:COG0195,TIGR:TIGR01953 Transcription elongation factor	0	0	0	0	0	0	0	0	0	0	0	0	0	0	0	0	0	0	1.8	2.7	0	0	0	0
CLST006670 COG:COG0363,KEGG:K02564,TIGR:TIGR00502 6-phosphogluconolactonase/Glucosamine-6-phosphate isomerase/deaminase	0	0	0	2.1	0	0	0	0	0	0	0	0	0	0	0	0	0	0	6.3	3.6	0	0	3.6	5.3
CLST006673 TIGR:TIGR01049,COG:COG0051,TIGR:TIGR01046,KEGG:K02946 Ribosomal protein S10	13.8	17.7	13.3	10.3	10.8	17.2	9.1	5.9	8.2	15.6	8.8	10	19	19.2	19.6	15.2	5.6	4.2	25.2	35.3	7.4	6.5	4.5	8
CLST006706 TIGR:TIGR02027,COG:COG0202,KEGG:K03040 DNA-directed RNA polymerase, alpha subunit/40 kD subunit	0	0	0	0	0	0	0	0	0	0	0	0	0	0	0	0	0	0	0.9	1.8	0	0	0	0
CLST006721 KEGG:K03530,PFAM:PF00216.14,COG:COG0776 Bacterial nucleoid DNA-binding protein	0	0	0	0	0	0	0	0	0	0	0	0	0	0	0	0	0	0	0	1.8	0	0	0	0
CLST006726 COG:COG0205,TIGR:TIGR02482,KEGG:K00850 6-phosphofructokinase	0	0	0	0	0	0	0	0	0	0	0	0	0	0	1	0	0	0	0	0	0	0	0	2.7
CLST006751 TIGR:TIGR00012,KEGG:K02904,COG:COG0255 Ribosomal protein L29	0	0	0	0	0	0	0	0	0	0	0	0	0	3.2	0	0	0	0	0	0	0	5.4	0	0
CLST006756 COG:COG3968,PFAM:PF12437.1,KEGG:K01915 Uncharacterized protein related to glutamine synthetase	0	0	0	0	0	0	0	0	0	0	0	0	0	0	0	0	0	0	0.9	10	0	0	0	0
CLST006760 COG:COG0268,KEGG:K02968,TIGR:TIGR00029 Ribosomal protein S20	0	0	0	0	0	0	0	0	0	0	0	0	0	0	0	0	0	0	0	0	3.2	3.3	0	0
CLST006798 NOG:NOG42699,NOG:NOG148028 Annotation not available	3.2	0	0	0	0	0	0	0	0	0	0	0	0	0	0	0	0	0	0	0	0	0	0	0
CLST006803 COG:COG2871,TIGR:TIGR01941,KEGG:K00351 Na+-transporting NADH:ubiquinone oxidoreductase, subunit NqrF	5.3	3.5	2	3.1	0	0	0	0	0	0	0	0	2	0	3.1	6.1	0	3.2	1.8	3.6	5.3	4.4	0	1.8
CLST006805 TIGR:TIGR00012,PFAM:PF00831.16,KEGG:K02904,COG:COG0255 Ribosomal protein L29	4.2	0	3.1	0	4.5	3.6	7.1	5.9	7.3	2.7	2.2	4.5	4	10.7	6.2	2	3.4	0	6.3	1.8	6.3	5.4	1.8	5.3
CLST006829 TIGR:TIGR02012,COG:COG0468,KEGG:K03553 RecA/RadA recombinase	2.1	0	2	3.1	0	0	0	0	0	0	0	0	0	0	0	0	0	0	0.9	0.9	0	0	0	0.9
CLST006833 COG:COG0550,TIGR:TIGR01057,TIGR:TIGR01051,KEGG:K03169,PFAM:PF01131.13,TIGR:TIGR01056 Topoisomerase IA	0	0	0	0	0	0	0	0	0	0	0	0	0	0	0	5.1	0	0	0	0	0	0	0	0
CLST006834 PFAM:PF00162.12,COG:COG0126,KEGG:K00927 3-phosphoglycerate kinase	35	23.6	65.6	75.2	16.1	16.3	16.1	8.9	15.5	22.9	76.8	73.6	16	8.5	23.7	21.3	30.4	31.7	61.2	60.7	6.3	6.5	13.4	15.1
CLST006844 COG:COG0102,KEGG:K02871,TIGR:TIGR01066 Ribosomal protein L13	21.2	16.5	12.3	13.4	6.3	7.3	4	0	8.2	6.4	11	7.8	9	13.9	11.3	6.1	2.3	0	26.1	18.1	3.2	7.6	2.7	3.6
CLST006878 KEGG:K03530,PFAM:PF00216.14,COG:COG0776 Bacterial nucleoid DNA-binding protein	10.6	17.7	14.3	13.4	9.9	3.6	7.1	6.9	11	10.1	12.1	20.1	42	42.7	8.2	9.1	6.8	6.3	13.5	14.5	8.5	4.4	0	0
CLST006881 KEGG:K00789,PFAM:PF02773.9,COG:COG0192,TIGR:TIGR01034 S-adenosylmethionine synthetase	3.2	3.5	3.1	3.1	2.7	2.7	0	0	0	0	0	1.1	0	3.2	0	0	0	2.1	11.7	7.2	0	0	2.7	1.8
CLST006883 TIGR:TIGR03496,KEGG:K02114,KEGG:K02112,PFAM:PF00401.13,TIGR:TIGR03498,COG:COG0055,TIGR:TIGR03305,TIGR:TIGR01039 F0F1-type ATP synthase, beta subunit	4.2	4.7	7.2	7.2	1.8	2.7	4	2	2.7	3.7	6.6	1.1	12	11.7	7.2	5.1	3.4	5.3	8.1	10	9.5	6.5	3.6	2.7
CLST006904 KEGG:K02892,PFAM:PF00276.13,COG:COG0089,TIGR:TIGR03636 Ribosomal protein L23	8.5	7.1	9.2	7.2	9.9	8.2	11.1	3	4.6	7.3	5.5	13.4	20	18.2	5.2	5.1	11.3	5.3	11.7	11.8	12.7	7.6	0	1.8
CLST006906 COG:COG0329,KEGG:K01639,NOG:NOG132040 Dihydrodipicolinate synthase	0	0	0	0	0	0	0	0	0	0	0	0	0	0	0	0	0	0	2.7	4.5	0	0	0	0
CLST006921 NOG:NOG118713 Protein involved in phosphoenolpyruvate-dependent sugar phosphotransferase system	7.4	4.7	4.1	8.2	6.3	6.3	4	3	12.8	11.9	15.4	8.9	12	20.3	12.4	12.2	7.9	8.4	9.9	10.9	13.7	14.1	4.5	3.6
CLST006933 KEGG:K00656,TIGR:TIGR01255,COG:COG1882 Pyruvate-formate lyase	12.7	16.5	0	3.1	0	0.9	3	2	1.8	0	3.3	0	0	0	0	5.1	0	0	0	0	0	0	0	0
CLST006959 KEGG:K02892,PFAM:PF00276.13,COG:COG0089 Ribosomal protein L23	0	0	0	0	0	0	0	0	0	0	0	0	3	3.2	0	0	0	0	0	0	5.3	6.5	0	0
CLST007020 TIGR:TIGR03121,TIGR:TIGR01975,KEGG:K01443,COG:COG1820,TIGR:TIGR02033 N-acetylglucosamine-6-phosphate deacetylase	0	0	0	0	0	0	0	0	0	0	0	0	0	0	0	3	0	0	0	0	0	3.3	0	0
CLST007033 KEGG:K00656,TIGR:TIGR01255,COG:COG1882 Pyruvate-formate lyase	19.1	20.1	59.4	48.4	14.3	10.9	30.2	23.7	11.9	11.9	54.8	27.9	7	16	8.2	6.1	4.5	6.3	81.9	72.5	6.3	9.8	14.3	17.8
CLST007034 PFAM:PF03989.6,KEGG:K02469,TIGR:TIGR01063,COG:COG0188,PFAM:PF00521.13,TIGR:TIGR01061 Type IIA topoisomerase (DNA gyrase/topo II, topoisomerase IV), A subunit	0	0	0	0	0	0	0	0	0	0	0	0	2	0	0	0	0	0	0	0	0	0	0	0
CLST007037 COG:COG0267,TIGR:TIGR01023,KEGG:K02913,PFAM:PF00471.13 Ribosomal protein L33	0	0	0	0	0	0	0	0	4.6	0	0	2.2	0	0	0	0	0	0	0	0	0	0	0	1.8
CLST007054 KEGG:K00616,TIGR:TIGR00875,COG:COG0176 Transaldolase	3.2	0	0	2.1	0	0	0	0	0	0	0	0	0	0	0	0	0	0	0	0	4.2	0	0	0
CLST007063 hypothetical protein	0	2.4	8.2	6.2	0	0	0	2	0	0	6.6	7.8	6	8.5	4.1	4.1	0	5.3	0	0	0	0	0.9	0
CLST007087 TIGR:TIGR01241,COG:COG0465,KEGG:K03798 ATP-dependent Zn proteases	5.3	7.1	3.1	1	0	0	0	0	0	0	1.1	0	0	0	0	0	0	0	5.4	4.5	0	0	3.6	2.7
CLST007088 PFAM:PF00140.13,COG:COG0568,KEGG:K03086,TIGR:TIGR02393,TIGR:TIGR02997,TIGR:TIGR02394 DNA-directed RNA polymerase, sigma subunit (sigma70/sigma32)	0	0	0	0	0	0	0	0	0	0	0	0	0	2.1	1	1	0	0	0	0	0	0	0	0
CLST007119 KEGG:K03046,TIGR:TIGR02389,PFAM:PF04997.5,TIGR:TIGR02388,COG:COG0086,TIGR:TIGR02387,TIGR:TIGR02386 DNA-directed RNA polymerase, beta subunit/160 kD subunit	20.2	20.1	20.5	21.6	12.5	13.6	3	4.9	7.3	9.2	9.9	2.2	3	7.5	13.4	7.1	3.4	5.3	24.3	23.5	4.2	2.2	6.3	10.7
CLST007120 KEGG:K00616,TIGR:TIGR00875,COG:COG0176 Transaldolase	30.8	27.1	34.8	22.7	8.1	9.1	11.1	2	4.6	0	14.3	8.9	16	35.2	8.2	9.1	2.3	6.3	30.6	34.4	13.7	4.4	9	7.1
CLST007162 KEGG:K02914,NOG:NOG137226,PFAM:PF00468.10,COG:COG0230 Ribosomal protein L34	0	0	0	0	0	0	0	0	1.8	0	0	0	0	0	0	0	0	0	0	0	0	0	0	0
CLST007166 TIGR:TIGR00465,COG:COG0059,PFAM:PF07991.5,KEGG:K00053 Ketol-acid reductoisomerase	5.3	0	5.1	0	0	0	0	0	0	0	0	0	0	0	0	0	0	0	0	0	0	0	0	3.6
CLST007181 COG:COG0148,KEGG:K01689,TIGR:TIGR01060 Enolase	3.2	2.4	0	0	3.6	1.8	0	0	5.5	1.8	23	35.7	0	1.1	0	0	0	0	18	17.2	0	0	6.3	8
CLST007182 TIGR:TIGR00978,COG:COG0136,KEGG:K00133,TIGR:TIGR01296 Aspartate-semialdehyde dehydrogenase	2.1	4.7	9.2	7.2	0.9	0.9	0	0	2.7	2.7	9.9	6.7	3	4.3	4.1	7.1	0	0	14.4	15.4	2.1	5.4	0.9	1.8
CLST007187 KEGG:K01580,COG:COG0076,TIGR:TIGR01788 Glutamate decarboxylase and related PLP-dependent proteins	5.3	7.1	2	2.1	0	0	0	0	0	0	0	0	0	0	0	0	0	0	0	0	7.4	12	0	0
CLST007193 TIGR:TIGR00060,COG:COG0256,KEGG:K02881 Ribosomal protein L18	2.1	4.7	0	2.1	0.9	1.8	0	0	8.2	6.4	3.3	4.5	12	15	2.1	3	1.1	1.1	5.4	4.5	2.1	4.4	2.7	1.8
CLST007201 TIGR:TIGR00337,KEGG:K01937,COG:COG0504 CTP synthase (UTP-ammonia lyase)	0	0	0	0	0	0	0	0	0	0	0	0	0	0	0	0	0	0	1.8	1.8	0	0	0	0
CLST007213 COG:COG0261,KEGG:K02888,TIGR:TIGR00061 Ribosomal protein L21	9.6	11.8	3.1	3.1	5.4	6.3	0	3	1.8	0.9	5.5	12.3	11	13.9	0	0	1.1	2.1	2.7	1.8	0	0	0	0
CLST007222 KEGG:K04567,COG:COG1190,TIGR:TIGR00458,TIGR:TIGR00462,TIGR:TIGR00499,TIGR:TIGR00399,COG:COG0073,TIGR:TIGR00459,PFAM:PF00152.13 Lysyl-tRNA synthetase (class II)	7.4	2.4	5.1	5.1	0	0	2	1	0	0	2.2	0	0	0	0	0	4.5	6.3	0	2.7	0	0	0	1.8
CLST007226 KEGG:K02986,COG:COG0522,TIGR:TIGR01017 Ribosomal protein S4 and related proteins	14.9	18.9	20.5	11.3	10.8	14.5	5	4	4.6	4.6	14.3	17.9	9	16	5.2	4.1	3.4	0	22.5	26.3	8.5	7.6	2.7	5.3
CLST007232 TIGR:TIGR01830,COG:COG4221,TIGR:TIGR01829,TIGR:TIGR01963,TIGR:TIGR02415,KEGG:K00540 Short-chain alcohol dehydrogenase of unknown specificity	0	0	0	0	0	0	0	0	0	0	0	0	0	0	0	0	0	0	1.8	0	0	0	0	0
CLST007238 TIGR:TIGR00422,TIGR:TIGR00392,COG:COG0060,KEGG:K01870 Isoleucyl-tRNA synthetase	5.3	5.9	0	0	0	0	0	0	0	0	0	0	0	0	0	0	0	0	1.8	2.7	0	0	0	3.6
CLST007244 COG:COG1217,TIGR:TIGR01393,TIGR:TIGR03680,TIGR:TIGR01394,TIGR:TIGR00484,KEGG:K06207,TIGR:TIGR00490 Predicted membrane GTPase involved in stress response	0	0	0	0	0	0	0	0	0	0	0	0	0	0	0	0	0	0	2.7	0	0	0	0	0
CLST007245 PFAM:PF00120.17,COG:COG0174,KEGG:K01915,TIGR:TIGR00653 Glutamine synthetase	5.3	4.7	5.1	4.1	0	0	0	0	0	0	0	0	0	0	2.1	0	0	0	2.7	1.8	0	3.3	4.5	3.6
CLST007250 TIGR:TIGR02630,KEGG:K01805,COG:COG2115 Xylose isomerase	5.3	4.7	2	2.1	0	0	0	0	0	0	0	0	0	2.1	0	0	0	0	4.5	4.5	14.8	14.1	0	2.7
CLST007253 KEGG:K01756,TIGR:TIGR00928,COG:COG0015 Adenylosuccinate lyase	5.3	8.3	7.2	5.1	4.5	4.5	0	0	0	0	0	2.2	3	0	0	0	0	0	9.9	11.8	0	0	5.4	2.7
CLST007254 KEGG:K00757,TIGR:TIGR00107,TIGR:TIGR01718,COG:COG2820 Uridine phosphorylase	0	0	3.1	0	0	0	0	0	0	0	0	0	0	0	0	0	0	0	0	0	2.1	2.2	0	0
CLST007258 TIGR:TIGR01771,COG:COG0039,TIGR:TIGR01763,KEGG:K00026 Malate/lactate dehydrogenases	9.6	4.7	5.1	8.2	0	0	0	0	0	0	0	0	0	0	9.3	10.1	0	0	13.5	13.6	6.3	8.7	4.5	6.2
CLST007262 KEGG:K02982,TIGR:TIGR01009,COG:COG0092 Ribosomal protein S3	21.2	11.8	15.4	25.7	16.1	19	4	3	7.3	7.3	8.8	8.9	12	18.2	12.4	10.1	1.1	3.2	27.9	29.9	2.1	6.5	19.7	18.7
CLST007268 PFAM:PF00183.11,COG:COG0326,KEGG:K04079 Molecular chaperone, HSP90 family	2.1	0	0	0	0	0	0	0	0	0	0	0	0	0	0	0	0	0	2.7	1.8	0	0	1.8	2.7
CLST007269 COG:COG0098,KEGG:K02988,TIGR:TIGR01021 Ribosomal protein S5	21.2	37.8	24.6	21.6	13.4	15.4	7.1	3	6.4	14.7	23	11.2	8	11.7	18.6	16.2	11.3	11.6	38.7	46.2	9.5	14.1	18.8	15.1
CLST007271 COG:COG0187,PFAM:PF00986.14,KEGG:K02470,KEGG:K02622,TIGR:TIGR01059,TIGR:TIGR01058 Type IIA topoisomerase (DNA gyrase/topo II, topoisomerase IV), B subunit	0	0	0	0	0	0	0	0	0	0	0	0	0	0	0	0	0	0	0	0	0	0	0	1.8
CLST007291 TIGR:TIGR00472,KEGG:K01890,COG:COG0073,COG:COG0072,PFAM:PF03147.7 Phenylalanyl-tRNA synthetase beta subunit	0	2.4	0	0	0	0	0	0	0	0	0	0	0	0	0	0	0	0	0	0	0	0	0	0
CLST007297 PFAM:PF02769.15,TIGR:TIGR01857,KEGG:K01952,TIGR:TIGR01735,TIGR:TIGR01739,COG:COG0047,TIGR:TIGR01737,COG:COG0046 Phosphoribosylformylglycinamidine (FGAM) synthase, synthetase domain	2.1	5.9	2	4.1	0	0	0	0	0	0	0	0	0	0	0	0	0	0	4.5	7.2	5.3	5.4	2.7	2.7
CLST007303 KEGG:K00656,TIGR:TIGR01255,PFAM:PF01228.14,COG:COG1882 Pyruvate-formate lyase	2.1	8.3	4.1	0	1.8	0.9	3	0	3.7	0	8.8	11.2	0	0	0	0	6.8	4.2	0	0	0	0	0	0
CLST007308 TIGR:TIGR00398,TIGR:TIGR00399,KEGG:K01874,COG:COG0143,COG:COG0073 EMAP domain	0	0	0	0	0	0	0	0	0	0	0	0	0	0	0	0	0	0	0	0	0	0	0	0.9
CLST007316 PFAM:PF12439.1,PFAM:PF06202.7,COG:COG3408,TIGR:TIGR01561 Glycogen debranching enzyme	0	0	0	4.1	0	0	0	0	0	0	0	0	0	0	3.1	0	0	0	3.6	0	3.2	5.4	0	0
CLST007317 TIGR:TIGR01260,NOG:NOG73726,PFAM:PF00137.14,KEGG:K02110 ATP synthase	14.9	0	0	0	0	0	0	0	0	0	0	0	27	59.8	0	0	0	0	0	0	0	0	0	0
CLST007320 KEGG:K01945,TIGR:TIGR00877,PFAM:PF02844.8,COG:COG0151 Phosphoribosylamine-glycine ligase	2.1	0	8.2	8.2	0	0	0	0	0	0	0	0	0	0	0	2	3.4	4.2	0	0	0	0	0	0
CLST007328 KEGG:K06412,COG:COG2088,PFAM:PF04026.5 Uncharacterized protein, involved in the regulation of septum location	3.2	5.9	0	3.1	1.8	2.7	0	0	2.7	4.6	5.5	4.5	9	8.5	7.2	4.1	0	5.3	2.7	5.4	4.2	3.3	2.7	0
CLST007329 TIGR:TIGR00032,KEGG:K01940,COG:COG0137 Argininosuccinate synthase	2.1	2.4	2	0	0	0	0	0	0	0	0	0	0	0	0	0	0	0	2.7	5.4	0	0	0.9	2.7
CLST007330 TIGR:TIGR01327,COG:COG1052,KEGG:K03778,PFAM:PF02826.12 Lactate dehydrogenase and related dehydrogenases	0	1.2	0	0	0	0	0	0	0	0	0	0	0	0	0	0	0	0	0	0	0	0	0	0
CLST007338 TIGR:TIGR01235,COG:COG5016,TIGR:TIGR01108,KEGG:K01571 Pyruvate/oxaloacetate carboxyltransferase	13.8	17.7	25.6	20.6	5.4	8.2	2	1	2.7	0.9	8.8	4.5	3	6.4	5.2	3	3.4	7.4	17.1	13.6	2.1	0	6.3	4.4
CLST007351 TIGR:TIGR01842,TIGR:TIGR03719,TIGR:TIGR03873,COG:COG0488,TIGR:TIGR03740,TIGR:TIGR01288,TIGR:TIGR00968,TIGR:TIGR02868,TIGR:TIGR03005,PFAM:PF00005.20,TIGR:TIGR02314,TIGR:TIGR02857,TIGR:TIGR02633,TIGR:TIGR03771 ATPase components of ABC transporters with duplicated ATPase domains	2.1	2.4	0	0	0	0	0	0	0	0	0	0	2	3.2	0	0	0	0	0	0	0	0	0	0
CLST007355 TIGR:TIGR01024,COG:COG0335,KEGG:K02884 Ribosomal protein L19	4.2	9.4	10.2	11.3	8.1	8.2	0	0	3.7	7.3	13.2	11.2	11	12.8	6.2	8.1	4.5	3.2	10.8	15.4	4.2	0	4.5	3.6
CLST007372 TIGR:TIGR00002,KEGG:K02959,COG:COG0228 Ribosomal protein S16	9.6	9.4	0	0	3.6	2.7	0	3	5.5	6.4	0	0	3	3.2	0	3	5.6	0	0	1.8	0	6.5	0	0
CLST007382 COG:COG1932,TIGR:TIGR01364,KEGG:K00831 Phosphoserine aminotransferase	3.2	0	3.1	4.1	0	0	0	0	0	0	0	0	0	0	0	0	0	0	4.5	2.7	0	0	0	0
CLST007389 KEGG:K02933,COG:COG0097,TIGR:TIGR03654 Ribosomal protein L6P/L9E	18	13	7.2	7.2	5.4	6.3	6	0	4.6	5.5	8.8	2.2	13	13.9	8.2	5.1	5.6	7.4	15.3	13.6	0	4.4	1.8	2.7
CLST007390 COG:COG1109,PFAM:PF02878.9,PFAM:PF00408.13,KEGG:K01840 Phosphomannomutase	0	0	2	0	0	0	0	0	0	0	0	0	0	0	0	0	0	0	0	0	0	0	2.7	2.7
CLST007393 KEGG:K02939,PFAM:PF01281.12,COG:COG0359,PFAM:PF03948.7 Ribosomal protein L9	0	0	0	0	0	0	0	0	0	0	0	0	0	0	0	0	0	0	1.8	2.7	0	0	0	0
CLST007397 KEGG:K12527,TIGR:TIGR03315,COG:COG0493 NADPH-dependent glutamate synthase beta chain and related oxidoreductases	0	0	0	0	0	0	0	0	0	0	0	0	0	0	0	0	0	0	0	0	0	0	0	1.8
CLST007401 COG:COG0774,TIGR:TIGR00325,TIGR:TIGR01750,KEGG:K02535,COG:COG0764,PFAM:PF03331.6 3-hydroxymyristoyl/3-hydroxydecanoyl-(acyl carrier protein) dehydratases	0	0	0	0	0	0	0	0	0	0	0	0	0	0	0	0	0	0	0	0	6.3	4.4	0	2.7
CLST007409 PFAM:PF00347.16,KEGG:K02933,COG:COG0097,TIGR:TIGR03654 Ribosomal protein L6P/L9E	0	0	0	0	0	0	0	0	0	0	0	0	0	0	0	0	0	0	5.4	6.3	0	0	0	0
CLST007411 KEGG:K00789,PFAM:PF02773.9,COG:COG0192,TIGR:TIGR01034 S-adenosylmethionine synthetase	1.1	0	0	0	0	0	0	0	0	0	0	0	0	0	0	0	0	0	0	1.8	0	0	0	0.9
CLST007424 COG:COG0244,KEGG:K02864,NOG:NOG79906 Annotation not available	11.7	14.2	14.3	14.4	0	0	0	0	0	0	0	0	0	0	21.6	13.2	2.3	2.1	36	34.4	10.6	10.9	16.1	14.2
CLST007428 PFAM:PF11987.1,TIGR:TIGR00487,KEGG:K02519,PFAM:PF04760.8,COG:COG0532 Translation initiation factor 2 (IF-2; GTPase)	0	0	0	0	0	0	0	0	0	0	0	0	0	0	0	0	0	0	1.8	1.8	0	0	0	0
CLST007429 TIGR:TIGR00002,KEGG:K02959,COG:COG0228 Ribosomal protein S16	0	0	0	0	0	0	0	0	0	0	0	0	0	0	0	0	0	0	4.5	0	0	0	3.6	4.4
CLST007434 TIGR:TIGR00557,KEGG:K00097,COG:COG1995 Pyridoxal phosphate biosynthesis protein	0	0	0	0	0	0	0	0	0	0	0	0	0	0	0	0	0	0	1.8	0	0	0	0	0
CLST007442 PFAM:PF01808.11,COG:COG0138,KEGG:K00602,TIGR:TIGR00355 AICAR transformylase/IMP cyclohydrolase PurH (only IMP cyclohydrolase domain in Aful)	0	0	0	0	0	0	0	0	0	0	0	0	0	0	0	0	0	0	1.8	0	0	0	1.8	1.8
CLST007446 KEGG:K04043,COG:COG0443,TIGR:TIGR02350 Molecular chaperone	1.1	4.7	0	2.1	7.2	5.4	6	4.9	0	0	9.9	7.8	0	0	0	0	6.8	3.2	0	0	0	0	1.8	2.7
CLST007450 PFAM:PF00342.12,COG:COG0166,KEGG:K01810 Glucose-6-phosphate isomerase	0	2.4	0	0	0	0	0	0	0	0	0	0	0	0	0	0	0	0	0	0.9	0	0	0	0
CLST007461 KEGG:K04078,PFAM:PF00166.14,COG:COG0234 Co-chaperonin GroES (HSP10)	30.8	30.7	19.5	13.4	13.4	13.6	14.1	4.9	13.7	12.8	16.4	21.2	57	59.8	38.1	32.5	14.6	10.6	10.8	14.5	26.4	17.4	2.7	1.8
CLST007496 KEGG:K02356,COG:COG0231,TIGR:TIGR00038 Translation elongation factor P (EF-P)/translation initiation factor 5A (eIF-5A)	0	0	0	0	0	0	0	0	0	0	0	0	0	2.1	0	0	0	2.1	2.7	1.8	0	0	0	0
CLST007499 PFAM:PF00958.15,TIGR:TIGR00884,TIGR:TIGR00888,COG:COG0518,KEGG:K01951,COG:COG0519 GMP synthase, PP-ATPase domain/subunit	0	0	0	0	0	0.9	0	0	0	0	0	0	0	0	0	0	0	0	0	0	0	0	0	0
CLST007501 COG:COG0041,KEGG:K01588,TIGR:TIGR01162 Phosphoribosylcarboxyaminoimidazole (NCAIR) mutase	0	0	0	0	0	0	0	0	0	0	0	0	0	0	0	0	0	0	0	0	0	2.2	0	0
CLST007503 TIGR:TIGR00255,PFAM:PF03755.6,PFAM:PF08340.4,COG:COG1561 Uncharacterized stress-induced protein	0	0	0	0	0	0	0	0	1.8	0	0	0	0	0	0	0	0	0	1.8	0	0	0	0	0
CLST007505 TIGR:TIGR01179,KEGG:K01784,COG:COG1087 UDP-glucose 4-epimerase	4.2	5.9	2	3.1	0	0	0	0	0	0	0	0	0	0	0	0	0	0	3.6	7.2	0	0	0.9	0
CLST007506 KEGG:K03561,COG:COG0811,PFAM:PF01618.9 Biopolymer transport proteins	13.8	10.6	18.4	18.5	0	0	0	0	0	0	2.2	0	0	7.5	3.1	6.1	0	3.2	20.7	28.1	0	0	8.1	13.3
CLST007531 TIGR:TIGR03346,COG:COG0542,KEGG:K03695 ATPases with chaperone activity, ATP-binding subunit	4.2	4.7	0	2.1	0	0	0	0	0	0	0	0	0	0	0	0	0	0	3.6	4.5	0	0	7.2	6.2
CLST007534 PFAM:PF00742.12,PFAM:PF01842.18,TIGR:TIGR00657,TIGR:TIGR02078,COG:COG0527,KEGG:K12524,COG:COG0460 Homoserine dehydrogenase	0	0	0	0	0	0	0	0	0	0	0	0	0	0	0	0	0	0	1.8	2.7	0	0	0	0
CLST007546 COG:COG1297 Predicted membrane protein	0	0	0	0	0	0	0	0	0	0	0	0	0	1.1	0	0	0	0	0	0	0	0	0	0
CLST007547 TIGR:TIGR02673,TIGR:TIGR03258,COG:COG1136,TIGR:TIGR03265,TIGR:TIGR02982,TIGR:TIGR03005,KEGG:K02003,TIGR:TIGR03608,TIGR:TIGR02211,TIGR:TIGR03864,TIGR:TIGR02633 ABC-type antimicrobial peptide transport system, ATPase component	13.8	16.5	5.1	3.1	0	0	0	0	0	0	0	0	0	0	0	0	0	0	0	0	0	0	3.6	1.8
CLST007553 TIGR:TIGR00744,COG:COG1940,KEGG:K00845 Transcriptional regulator/sugar kinase	0	0	0	0	0	0	0	0	0	0	0	0	0	0	0	2	0	0	3.6	1.8	0	0	1.8	1.8
CLST007557 KEGG:K00764,COG:COG0034,TIGR:TIGR01134 Glutamine phosphoribosylpyrophosphate amidotransferase	0	0	0	0	0	0	0	0	0	0	0	0	0	0	0	0	0	0	0	0	0	0	1.8	0
CLST007564 TIGR:TIGR03596,COG:COG0012,TIGR:TIGR03594,KEGG:K06942,TIGR:TIGR00092,TIGR:TIGR02729 Predicted GTPase, probable translation factor	2.1	0	2	1	0	0	0	0	0	0	0	0	0	0	0	0	0	0	0.9	0	0	0	0	0
CLST007573 COG:COG1185,KEGG:K00962,TIGR:TIGR03591 Polyribonucleotide nucleotidyltransferase (polynucleotide phosphorylase)	17	7.1	19.5	14.4	1.8	0.9	2	1	1.8	0	9.9	8.9	5	7.5	6.2	4.1	3.4	1.1	1.8	5.4	4.2	4.4	0	0
CLST007579 TIGR:TIGR00651,KEGG:K00625,COG:COG0280 Phosphotransacetylase	2.1	0	0	0	0	0	0	0	0	0	0	0	0	0	0	0	0	0	7.2	6.3	0	0	4.5	0.9
CLST007597 KEGG:K02500,COG:COG0107,TIGR:TIGR00735 Imidazoleglycerol-phosphate synthase	0	0	0	0	0	0	0	0	0	0	0	0	0	0	0	0	0	0	0	0	0	0	0.9	0.9
CLST007632 COG:COG0088,KEGG:K02926,PFAM:PF00573.15,NOG:NOG125323 Annotation not available	3.2	0	9.2	11.3	0	0	0	0	0	0	0	0	0	0	3.1	6.1	0	0	8.1	9.1	0	0	6.3	5.3
CLST007639 PFAM:PF02810.8,KEGG:K03070,PFAM:PF07516.6,TIGR:TIGR00963,COG:COG0653,TIGR:TIGR03714 Preprotein translocase subunit SecA (ATPase, RNA helicase)	7.4	7.1	0	0	0	0	0	0	0	0	0	0	0	0	0	0	0	0	9	8.2	0	0	0.9	0
CLST007642 COG:COG0203,TIGR:TIGR00059,PFAM:PF01196.12,KEGG:K02879 Ribosomal protein L17	19.1	17.7	12.3	10.3	4.5	10.9	2	0	11	10.1	13.2	10	19	18.2	10.3	12.2	5.6	6.3	23.4	17.2	8.5	7.6	2.7	7.1
CLST007668 COG:COG0330 Membrane protease subunits, stomatin/prohibitin homologs	7.4	7.1	9.2	9.3	0	0	0	0	0	4.6	9.9	19	2	3.2	0	3	11.3	3.2	1.8	8.2	0	0	3.6	4.4
CLST007670 TIGR:TIGR01064,COG:COG0469,KEGG:K00873 Pyruvate kinase	0	0	0	0	0	0	0	0	0	0	0	0	0	0	0	0	0	0	0	0	3.2	3.3	0	0
CLST007671 TIGR:TIGR00651,PFAM:PF00390.12,COG:COG0281,COG:COG0280,KEGG:K00029,PFAM:PF03949.8 Phosphotransacetylase	0	4.7	2	3.1	0	0	0	0	0	0	0	0	0	0	2.1	0	0	0	3.6	5.4	3.2	0	1.8	0
CLST007675 KEGG:K03718,COG:COG1522 Transcriptional regulators	0	0	0	0	0	0	0	0	0	0	0	0	0	0	0	0	0	0	0	1.8	0	0	0	0
CLST007677 NOG:NOG45293 Annotation not available	4.2	0	0	0	0	0	0	0	0	0	0	0	0	0	0	0	0	3.2	1.8	0	0	0	0	2.7
CLST007682 KEGG:K01613,COG:COG0688 Phosphatidylserine decarboxylase	0	0	0	0	0	0	0	0	0	0	0	0	0	0	0	0	2.3	0	0	0	0	0	0	0
CLST007711 KEGG:K00688,PFAM:PF11897.1,TIGR:TIGR02094,COG:COG0058 Glucan phosphorylase	9.6	5.9	6.1	6.2	0	0	0	0	0	0	0	0	0	0	3.1	13.2	0	0	5.4	5.4	0	0	3.6	1.8
CLST007712 COG:COG1592,PFAM:PF02915.10,KEGG:K00532 Rubrerythrin	4.2	4.7	0	0	0	0	0	0	0	0	0	0	4	0	0	0	0	0	0	1.8	0	0	0	0
CLST007720 TIGR:TIGR03594,KEGG:K03977,COG:COG1160 Predicted GTPases	0	0	0	0	0	0	0	0	0	0	0	0	0	0	0	0	0	0	3.6	3.6	0	0	0	0
CLST007723 hypothetical protein	0	0	0	0	0	0	0	0	0	0	0	0	0	0	0	0	0	0	0	0	0	0	0.9	0.9
CLST007732 KEGG:K00762,TIGR:TIGR00336,TIGR:TIGR01367,COG:COG0461 Orotate phosphoribosyltransferase	0	3.5	0	0	0	0	0	0	0	0	0	0	0	0	0	0	0	0	0	1.8	0	0	0	0
CLST007733 TIGR:TIGR00914,TIGR:TIGR00915,COG:COG0841,KEGG:K03296,PFAM:PF00873.12 Cation/multidrug efflux pump	5.3	0	0	0	0	0	0	0	0	0	0	0	0	0	0	0	0	0	0	0	0	0	0	0
CLST007734 KEGG:K00939,TIGR:TIGR01351,TIGR:TIGR01359,COG:COG0563 Adenylate kinase and related kinases	3.2	0	0	0	0	0	0	0	0	0	0	0	0	0	0	0	0	0	0	1.8	0	0	0	0
CLST007740 KEGG:K00283,COG:COG0403,TIGR:TIGR00461,COG:COG1003 Glycine cleavage system protein P (pyridoxal-binding), N-terminal domain	2.1	3.5	8.2	8.2	0	0	0	0	0	0	0	0	0	0	2.1	4.1	0	0	0	0	3.2	5.4	4.5	3.6
CLST007743 TIGR:TIGR03683,TIGR:TIGR00344,PFAM:PF07973.7,KEGG:K01872,COG:COG0013 Alanyl-tRNA synthetase	0	0	0	0	0	0	0	0	0	0	0	0	0	0	0	0	0	0	1.8	0	0	0	0	0
CLST007755 KEGG:K08301,TIGR:TIGR00757,NOG:NOG116925,COG:COG1530 Ribonuclease G	2.1	0	0	0	0	0	0	0	0	0	0	0	0	0	0	0	0	0	0	0	0	0	0	0
CLST007757 TIGR:TIGR00422,TIGR:TIGR00392,COG:COG0060,TIGR:TIGR00396,KEGG:K01870 Isoleucyl-tRNA synthetase	2.1	0	2	2.1	0	0	0	0	0	0	0	0	0	0	0	0	0	0	1.8	0	0	0	0	0
CLST007759 PFAM:PF00441.17,COG:COG1960,COG:COG1773,TIGR:TIGR03207,PFAM:PF00301.13,PFAM:PF00766.12,PFAM:PF02770.12,KEGG:K00248 Acyl-CoA dehydrogenases	0	0	0	7.2	0	0.9	0	0	0	0	0	0	0	0	0	0	0	0	0	0	0	0	0	0
CLST007760 TIGR:TIGR01937,KEGG:K00347,COG:COG1805 Na+-transporting NADH:ubiquinone oxidoreductase, subunit NqrB	0	7.1	4.1	0	0	0	0	0	0	0	0	0	0	0	3.1	0	3.4	3.2	0	0	2.1	3.3	0	0
CLST007779 PFAM:PF02614.7,KEGG:K01812,COG:COG1904 Glucuronate isomerase	5.3	0	5.1	4.1	0	0	0	0	0	0	0	0	0	0	0	2	0	0	4.5	2.7	3.2	4.4	1.8	0.9
CLST007783 TIGR:TIGR01936,COG:COG1726,PFAM:PF11973.1,KEGG:K00346,PFAM:PF05896.4 Na+-transporting NADH:ubiquinone oxidoreductase, subunit NqrA	7.4	11.8	8.2	5.1	0	0	0	0	0	0	0	0	2	3.2	21.6	15.2	14.6	15.8	2.7	5.4	9.5	9.8	4.5	4.4
CLST007784 COG:COG0197,TIGR:TIGR01164,KEGG:K02878 Ribosomal protein L16/L10E	2.1	0	2	3.1	0	0	3	2	1.8	0.9	2.2	0	0	0	0	0	0	0	9	12.7	0	0	11.7	10.7
CLST007786 COG:COG0246,KEGG:K00041 Mannitol-1-phosphate/altronate dehydrogenases	0	0	4.1	0	0	0	0	0	0	0	0	0	0	0	0	0	0	0	2.7	1.8	0	0	0	0
CLST007787 KEGG:K02876,COG:COG0200,TIGR:TIGR01071 Ribosomal protein L15	2.1	2.4	9.2	7.2	4.5	0	0	0	1.8	7.3	8.8	8.9	0	0	0	5.1	0	3.2	9.9	6.3	2.1	3.3	5.4	1.8
CLST007796 KEGG:K04567,COG:COG1190,TIGR:TIGR00499,TIGR:TIGR00399,COG:COG0073 Lysyl-tRNA synthetase (class II)	1.1	0	0	0	0	0	0	0	0	0	0	0	0	0	0	0	0	0	0	4.5	0	0	0	0
CLST007797 KEGG:K02956,TIGR:TIGR00952,COG:COG0184 Ribosomal protein S15P/S13E	7.4	9.4	7.2	5.1	2.7	4.5	0	4	8.2	7.3	7.7	2.2	8	9.6	9.3	3	3.4	0	9.9	7.2	3.2	7.6	7.2	5.3
CLST007798 KEGG:K03340,TIGR:TIGR01921,NOG:NOG27533 Dehydrogenase	7.4	2.4	3.1	3.1	0	0	0	0	0	0	0	0	0	2.1	4.1	6.1	0	0	0	1.8	7.4	6.5	0	1.8
CLST007809 COG:COG0800,KEGG:K01625 2-keto-3-deoxy-6-phosphogluconate aldolase	0	0	5.1	4.1	0	0	0	0	0	0	0	0	0	0	0	6.1	0	0	6.3	8.2	11.6	13.1	1.8	0
CLST007844 COG:COG1960,KEGG:K00257,PFAM:PF12186.1,PFAM:PF02770.12 Acyl-CoA dehydrogenases	5.3	2.4	0	0	0	0	0	0	0	0	0	0	0	0	0	0	0	0	5.4	3.6	0	0	5.4	0
CLST007855 TIGR:TIGR03315,PFAM:PF10418.2,COG:COG0543,KEGG:K00266,TIGR:TIGR01318,COG:COG0493,TIGR:TIGR01316 NADPH-dependent glutamate synthase beta chain and related oxidoreductases	5.3	1.2	6.1	1	1.8	1.8	0	0	0	0	1.1	0	3	0	0	0	0	1.1	3.6	3.6	0	0	0	0.9
CLST007859 KEGG:K06131,COG:COG1502,PFAM:PF00614.15 Phosphatidylserine/phosphatidylglycerophosphate/cardiolipin synthases and related enzymes	0	0	0	0	1.8	0	0	0	0	0	0	0	0	0	0	0	0	0	0	0	0	0	0	0
CLST007897 TIGR:TIGR02024,COG:COG3643,KEGG:K00603 Glutamate formiminotransferase	2.1	0	0	0	0	0	0	0	0	0	0	0	2	2.1	3.1	4.1	0	0	2.7	0	0	0	0	1.8
CLST007903 KEGG:K03768,PFAM:PF00160.14,TIGR:TIGR02336,COG:COG0652 Peptidyl-prolyl cis-trans isomerase (rotamase) - cyclophilin family	0	0	4.1	3.1	0	0	0	0	0	0	0	0	0	0	0	0	0	0	4.5	6.3	0	0	0	1.8
CLST007908 NOG:NOG84808,NOG:NOG83202 Transcriptional regulator protein	3.2	0	2	0	0	0	0	0	0	0	0	0	0	0	0	0	0	0	8.1	9.1	0	0	1.8	2.7
CLST007911 TIGR:TIGR03594,KEGG:K03977,TIGR:TIGR00436,COG:COG1160,TIGR:TIGR00450 Predicted GTPases	0	0	0	0	0	0	0	0	0	0	0	0	0	0	0	0	0	0	4.5	0	0	0	0	1.8
CLST007916 KEGG:K07664,TIGR:TIGR03787,PFAM:PF00486.21,KEGG:K07668,TIGR:TIGR02154,COG:COG0745,KEGG:K07661,KEGG:K02483,KEGG:K07775,KEGG:K07658,TIGR:TIGR01387 Response regulators consisting of a CheY-like receiver domain and a winged-helix DNA-binding domain	0	0	2	0	0	0	0	0	0	0	0	0	3	0	0	0	0	0	0	0	0	0	0	0
CLST007952 PFAM:PF00958.15,TIGR:TIGR00884,TIGR:TIGR00888,COG:COG0518,KEGG:K01951,COG:COG0519 GMP synthase - Glutamine amidotransferase domain	1.1	0	6.1	5.1	0	0	0	0	0	4.6	0	2.2	0	0	0	0	3.4	3.2	0	2.7	0	0	0	1.8
CLST008010 COG:COG0050,KEGG:K02358,TIGR:TIGR00485 GTPases - translation elongation factors	0	0	0	0	0	0	0	0	0	0	0	0	0	2.1	0	0	0	0	0	0	0	0	0	0
CLST008038 TIGR:TIGR02027,COG:COG0202,KEGG:K03040 DNA-directed RNA polymerase, alpha subunit/40 kD subunit	13.8	10.6	6.1	12.4	3.6	2.7	0	0	0	2.7	4.4	4.5	7	7.5	14.4	8.1	12.4	5.3	11.7	6.3	0	4.4	0.9	1.8
CLST008065 TIGR:TIGR02787,PFAM:PF08222.4,KEGG:K03706,PFAM:PF01396.12,COG:COG4465,KEGG:K03168,COG:COG0551 Pleiotropic transcriptional repressor	2.1	2.4	0	0	1.8	0	0	2	0	0	0	0	0	0	0	0	0	0	0.9	1.8	0	0	0	0
CLST008103 KEGG:K01041,TIGR:TIGR03458,COG:COG0427 Acetyl-CoA hydrolase	0	0	0	0	0	0	0	0	0	0	0	0	0	0	0	0	0	0	3.6	0	0	0	0	0
CLST008169 COG:COG3958,KEGG:K00615,TIGR:TIGR00232,PFAM:PF02780.13 Transketolase, C-terminal subunit	11.7	4.7	11.3	16.5	0	0	0	0	0	0	4.4	5.6	2	3.2	0	0	6.8	3.2	11.7	15.4	2.1	2.2	5.4	2.7
CLST008211 COG:COG0718,KEGG:K09747,PFAM:PF02575.9,TIGR:TIGR00103 Uncharacterized protein conserved in bacteria	0	0	0	0	0	0	0	0	0	0	0	0	0	22.4	0	2	0	0	0	0	7.4	2.2	0	0
CLST008241 TIGR:TIGR00033,COG:COG0082,KEGG:K01736 Chorismate synthase	0	0	0	2.1	0	0	0	0	0	0	0	0	0	0	3.1	4.1	0	0	0	0	2.1	0	0	0
CLST008260 PFAM:PF00120.17,COG:COG3968,PFAM:PF12437.1,KEGG:K01915 Uncharacterized protein related to glutamine synthetase	0	2.4	0	0	0	0	0	0	0	0	0	0	0	1.1	2.1	0	0	0	1.8	6.3	0	2.2	0	0
CLST008285 KEGG:K01815,COG:COG3717 5-keto 4-deoxyuronate isomerase	0	0	0	3.1	0	0	0	0	0	0	0	0	0	0	0	0	0	0	0	0	2.1	0	0	1.8
CLST008309 TIGR:TIGR01040,TIGR:TIGR01041,KEGG:K02118,COG:COG1156 Archaeal/vacuolar-type H+-ATPase subunit B	10.6	8.3	7.2	4.1	0	0	2	0	0	0	5.5	10	5	7.5	5.2	3	0	0	1.8	1.8	0	0	0	0
CLST008319 COG:COG0436,TIGR:TIGR03540,COG:COG1396,KEGG:K10907,TIGR:TIGR01264,TIGR:TIGR01265 Aspartate/tyrosine/aromatic aminotransferase	0	0	2	4.1	0	0	0	0	0	0	0	0	0	0	0	0	0	0	0	0	0	0	0	0
CLST008325 TIGR:TIGR00422,COG:COG0495,PFAM:PF00133.15,TIGR:TIGR00392,KEGG:K01869,TIGR:TIGR00396,TIGR:TIGR00395 Leucyl-tRNA synthetase	0	2.4	0	0	0	0	0	0	0	0	0	0	0	0	0	0	0	0	0.9	0	0	0	0	0
CLST008329 KEGG:K03526,TIGR:TIGR00612,COG:COG0821 Enzyme involved in the deoxyxylulose pathway of isoprenoid biosynthesis	0	2.4	3.1	2.1	0	0	0	0	0	0	0	0	0	0	0	0	0	0	0	0	0	0	0	0
CLST008339 COG:COG0554,KEGG:K00864,TIGR:TIGR01311 Glycerol kinase	0	0	0	0	0	0	0	0	0	0	0	0	2	0	0	0	0	0	0	0	0	0	0	0
CLST008351 PFAM:PF10371.2,TIGR:TIGR02176,COG:COG1014,KEGG:K03737,PFAM:PF00037.20,COG:COG0674,COG:COG1013 Pyruvate:ferredoxin oxidoreductase and related 2-oxoacid:ferredoxin oxidoreductases, beta subunit	41.4	42.5	12.3	18.5	53.8	52.6	11.1	4	6.4	11	17.5	22.3	30	26.7	18.6	17.3	1.1	6.3	72	59.8	7.4	10.9	15.2	11.6
CLST008356 TIGR:TIGR01308,COG:COG1841,KEGG:K02907 Ribosomal protein L30/L7E	0	0	2	0	2.7	4.5	2	0	0	0	2.2	2.2	0	0	0	0	0	0	5.4	3.6	0	0	0	0
CLST008379 COG:COG0605,PFAM:PF02777.11,KEGG:K04564,PFAM:PF00081.15 Superoxide dismutase	0	5.9	0	0	0	0	0	0	0	0	0	0	0	0	0	0	0	0	0	0	0	0	0	0
CLST008385 KEGG:K00925,TIGR:TIGR00016,COG:COG0282 Acetate kinase	0	0	2	0	0	0	0	0	0	2.7	0	0	0	0	0	3	0	0	0	2.7	0	0	0	2.7
CLST008389 hypothetical protein	0	0	0	0	0	0	0	0	0	0	0	3.3	0	0	0	0	0	0	0	0	0	0	0	0
CLST008416 KEGG:K00262,PFAM:PF02812.11,COG:COG0334,PFAM:PF00208.14 Glutamate dehydrogenase/leucine dehydrogenase	29.7	29.5	85	90.6	16.1	15.4	0	0	3.7	5.5	42.8	39	20	18.2	2.1	5.1	6.8	5.3	34.2	37.1	2.1	13.1	18.8	16.9
CLST008420 COG:COG0008,TIGR:TIGR00440,KEGG:K01886 Glutamyl- and glutaminyl-tRNA synthetases	0	0	3.1	2.1	0	0	0	0	0	0	0	0	0	0	0	1	0	0	0	0	0	0	0	0
CLST008429 TIGR:TIGR02144,COG:COG0458,PFAM:PF02786.10,TIGR:TIGR01369,PFAM:PF02787.12,KEGG:K01955,TIGR:TIGR02068 Carbamoylphosphate synthase large subunit (split gene in MJ)	7.4	7.1	18.4	13.4	0	0	0	0	0.9	0	2.2	4.5	0	2.1	2.1	1	0	0	8.1	0	0	0	0	0.9
CLST008433 PFAM:PF00162.12,COG:COG0126,KEGG:K00927 3-phosphoglycerate kinase	3.2	3.5	0	0	0	0	0	0	0	0	0	0	0	0	0	0	0	0	4.5	5.4	0	0	0	0
CLST008473 COG:COG1077,KEGG:K03569,TIGR:TIGR01174,TIGR:TIGR00904 Actin-like ATPase involved in cell morphogenesis	6.4	2.4	7.2	3.1	0	0	0	0	0	0	0	0	0	0	2.1	4.1	0	0	0	2.7	0	0	1.8	0
CLST008488 KEGG:K01818,COG:COG2407,TIGR:TIGR01089 L-fucose isomerase and related proteins	2.1	4.7	4.1	5.1	0	0	0	0	0	0	0	0	0	0	6.2	4.1	0	0	0	0	15.9	18.5	2.7	2.7
CLST008525 TIGR:TIGR01368,COG:COG0505,TIGR:TIGR00888,KEGG:K01956 Carbamoylphosphate synthase small subunit	0	0	4.1	4.1	0	0	0	0	0	0	0	0	0	0	0	0	0	0	0	1.8	0	0	0	0
CLST008538 COG:COG3537,PFAM:PF07971.5,TIGR:TIGR01180 Putative alpha-1,2-mannosidase	0	0	0	0	0	0	0	0	0	0	0	0	0	0	0	0	0	0	0	0	0	3.3	0	0
CLST008565 TIGR:TIGR02176,KEGG:K03737,COG:COG1013 Pyruvate:ferredoxin oxidoreductase and related 2-oxoacid:ferredoxin oxidoreductases, beta subunit	2.1	0	0	0	0	0	0	0	0	0	0	0	0	0	0	0	0	0	0	0	0	0	0	0
CLST008587 COG:COG0205,TIGR:TIGR02482,KEGG:K00850 6-phosphofructokinase	0	0	0	0	0	0	0	0	0	0	0	0	0	0	1	0	0	0	0	0	0	0	0.9	0
CLST008595 TIGR:TIGR01123,KEGG:K00826,COG:COG0115 Branched-chain amino acid aminotransferase/4-amino-4-deoxychorismate lyase	2.1	2.4	5.1	7.2	1.8	0	4	2	0	0	2.2	3.3	0	0	0	0	0	0	6.3	7.2	0	0	4.5	4.4
CLST008608 TIGR:TIGR01343,COG:COG1048,TIGR:TIGR02086,KEGG:K01681,TIGR:TIGR01342,TIGR:TIGR02083 Aconitase A	8.5	4.7	6.1	8.2	4.5	3.6	0	0	0	0	0	2.2	0	0	6.2	3	2.3	4.2	6.3	6.3	0	0	2.7	5.3
CLST008610 TIGR:TIGR00127,KEGG:K00031,COG:COG0538 Isocitrate dehydrogenases	3.2	2.4	4.1	4.1	0	0	2	0	0	0	1.1	2.2	0	0	2.1	2	4.5	0	2.7	7.2	0	0	0	0.9
CLST008618 COG:COG5016,TIGR:TIGR01108,KEGG:K01571 Pyruvate/oxaloacetate carboxyltransferase	0	0	0	0	0	0	0	0	0	0	0	0	0	0	0	0	0	0	1.8	4.5	0	0	0	0
CLST008648 PFAM:PF11987.1,TIGR:TIGR00487,KEGG:K02519,PFAM:PF04760.8,COG:COG0532 Translation initiation factor 2 (IF-2; GTPase)	0	0	0	0	0	0	0	0	0	0	2.2	0	0	0	0	0	0	0	0	0	0	0	0	0
CLST008665 COG:COG4496,TIGR:TIGR02531 Uncharacterized protein conserved in bacteria	0	0	0	0	0	0	0	0	0	0	0	0	0	3.2	0	0	0	0	0	0	0	0	0	0
CLST008679 KEGG:K01803,COG:COG0149,PFAM:PF00121.11,TIGR:TIGR00419 Triosephosphate isomerase	11.7	11.8	8.2	6.2	10.8	10.9	4	0	6.4	11	15.4	20.1	18	16	12.4	7.1	0	1.1	13.5	10.9	11.6	14.1	9	6.2
CLST008691 KEGG:K00939,TIGR:TIGR01351,COG:COG0563 Adenylate kinase and related kinases	0	0	0	2.1	0	0	0	0	0	0	0	0	3	2.1	0	0	0	0	2.7	1.8	0	0	0	0
CLST008744 COG:COG4806,TIGR:TIGR01748,KEGG:K01813 L-rhamnose isomerase	0	2.4	6.1	4.1	0	0	0	0	0	0	0	0	0	0	4.1	3	0	0	3.6	0	2.1	4.4	3.6	3.6
CLST008762 TIGR:TIGR00487,TIGR:TIGR00491,KEGG:K02519,PFAM:PF04760.8,COG:COG0532 Translation initiation factor 2 (IF-2; GTPase)	0	0	0	0	0	0	0	0	0	0	1.1	0	3	0	0	0	0	0	1.8	1.8	0	0	0.9	1.8
CLST008785 PFAM:PF04565.9,KEGG:K03043,TIGR:TIGR02013,COG:COG0085 DNA-directed RNA polymerase, beta subunit/140 kD subunit	0	0	0	0	0	0	0	0	0	0	0	0	0	0	0	0	0	0	1.8	0.9	0	0	0	0
CLST008792 TIGR:TIGR01012,COG:COG0052,TIGR:TIGR01011,KEGG:K02967 Ribosomal protein S2	12.7	9.4	7.2	3.1	3.6	0	0	0	0	0	17.5	0	0	0	0	0	18	9.5	0	0	0	0	2.7	1.8
CLST008821 COG:COG0056,TIGR:TIGR00962,KEGG:K02111 F0F1-type ATP synthase, alpha subunit	0	0	2	1	0	0	0	0	0	0	1.1	2.2	4	1.1	0	0	1.1	1.1	0	0.9	0	2.2	0	0
CLST008823 KEGG:K00853,COG:COG1070 Sugar (pentulose and hexulose) kinases	0	0	0	0	0	0	0	0	0	0	0	0	0	0	0	0	0	0	0	0	0	2.2	0	0
CLST008834 hypothetical protein	0	0	0	0	0	0	0	0	0	0	0	0	0	0	2.1	0	0	0	0	0	0	0	0	0
CLST008885 COG:COG0008,KEGG:K01885,TIGR:TIGR00464 Glutamyl- and glutaminyl-tRNA synthetases	0	0	0	0	0	0	0	0	0	0	0	0	0	0	0	0	0	2.1	0	0	0	0	0	0
CLST008887 COG:COG1506,TIGR:TIGR02800,PFAM:PF07676.5,PFAM:PF00326.14 Dipeptidyl aminopeptidases/acylaminoacyl-peptidases	0	2.4	0	0	0	0	0	0	0	0	0	0	3	4.3	0	0	0	0	0	0	0	0	0	0
CLST008897 hypothetical protein	0	0	0	0	0	0	0	0	0	0	0	0	2	0	0	0	0	0	0	0	0	0	0	0
CLST008913 KEGG:K09903,TIGR:TIGR02075,COG:COG0528 Uridylate kinase	0	0	0	0	0	0	0	0	0	0	0	2.2	0	0	0	0	0	0	0	0	0	0	0	0
CLST008922 KEGG:K01893,COG:COG0017,TIGR:TIGR00457,NOG:NOG146472 Protein involved in asparaginyl-tRNA aminoacylation	0	1.2	3.1	0	0	0	0	0	0	0	0	0	0	0	0	0	0	0	0	0	0	1.1	0	0
CLST008979 COG:COG0031,TIGR:TIGR01139,KEGG:K01738,TIGR:TIGR01136 Cysteine synthase	0	0	0	0	0	0	0	0	1.8	0	0	0	0	1.1	0	0	0	0	0	0	0	0	0	0
CLST008998 TIGR:TIGR03346,COG:COG0542,TIGR:TIGR03345,PFAM:PF02151.12,TIGR:TIGR02639,PFAM:PF10431.2,PFAM:PF07724.7,KEGG:K03696,PFAM:PF02861.13 ATPases with chaperone activity, ATP-binding subunit	1.1	0	0	0	0	0	0	0	0	0	1.1	4.5	0	0	0	0	1.1	0	0	0	0	0	0	0
CLST009064 COG:COG0217,TIGR:TIGR01033 Uncharacterized conserved protein	0	2.4	0	0	0	0	0	0	0	0	0	0	0	0	0	0	0	0	1.8	0	0	0	0	0
CLST009095 PFAM:PF01043.13,PFAM:PF02810.8,KEGG:K03070,PFAM:PF07516.6,TIGR:TIGR00963,COG:COG0653,TIGR:TIGR03714 Preprotein translocase subunit SecA (ATPase, RNA helicase)	3.2	1.2	5.1	2.1	0	0	0	0	0	0	0	0	4	3.2	2.1	0	0	0	0.9	1.8	0	0	0	0
CLST009126 COG:COG1502,PFAM:PF00614.15 Phosphatidylserine/phosphatidylglycerophosphate/cardiolipin synthases and related enzymes	0	0	2	0	0	0	0	0	0	0	0	0	0	0	0	0	0	0	0	0	0	0	0	0
CLST009132 TIGR:TIGR00915,COG:COG0841,KEGG:K03296,PFAM:PF00873.12 Cation/multidrug efflux pump	0	0	2	0	0	0	0	0	0	0	0	0	0	0	0	0	0	0	0	0	0	0	0	0
CLST009135 KEGG:K01802,COG:COG0545 FKBP-type peptidyl-prolyl cis-trans isomerases 1	0	0	0	0	0	1.8	0	0	0	0	0	2.2	0	0	0	0	0	2.1	0	0	0	0	0	0
CLST009154 KEGG:K03624,COG:COG0782,TIGR:TIGR01462 Transcription elongation factor	0	0	0	0	0	0	0	0	0	0.9	0	0	0	0	0	0	0	0	0	1.8	0	0	0	1.8
CLST009270 KEGG:K00088,TIGR:TIGR01302,COG:COG0516 IMP dehydrogenase/GMP reductase	3.2	3.5	3.1	1	0	0.9	2	0	0	0	2.2	6.7	0	0	0	0	0	0	0	0	0	0	3.6	4.4
CLST009347 KEGG:K00616,TIGR:TIGR00876,COG:COG0176 Transaldolase	24.4	20.1	28.7	15.4	13.4	11.8	8.1	6.9	0	0	25.2	41.3	0	0	0	0	19.1	25.3	0	0	0	0	6.3	6.2
CLST009371 KEGG:K02986,COG:COG0522,TIGR:TIGR01017 Ribosomal protein S4 and related proteins	3.2	0	3.1	4.1	5.4	3.6	0	0	0	0	5.5	6.7	0	0	0	0	2.3	3.2	0	0	0	0	5.4	7.1
CLST009425 TIGR:TIGR00002,KEGG:K02959,COG:COG0228 Ribosomal protein S16	9.6	5.9	8.2	7.2	10.8	6.3	10.1	4.9	0	2.7	17.5	21.2	0	0	0	0	11.3	4.2	0	0	0	0	0	0
CLST009456 COG:COG0056,TIGR:TIGR00962,KEGG:K02111 F0F1-type ATP synthase, alpha subunit	0	0	2	0	0.9	0	0	0	0.9	0	3.3	4.5	0	0	0	0	1.1	0	0	0	0	0	0	0
CLST009470 PFAM:PF10385.2,PFAM:PF04565.9,KEGG:K03043,TIGR:TIGR03670,PFAM:PF04560.13,TIGR:TIGR02013,COG:COG0085,PFAM:PF04561.7,PFAM:PF00562.21 DNA-directed RNA polymerase, beta subunit/140 kD subunit	1.1	0	1	1	2.7	5.4	0	0	0	0	1.1	0	0	0	0	0	0	0	0	0	0	0	2.7	1.8
CLST009489 COG:COG2508,KEGG:K02647 Regulator of polyketide synthase expression	1.1	0	6.1	6.2	0	0	0	0	0	0	0	0	0	0	0	0	0	0	0.9	1.8	0	0	0	0
CLST009534 COG:COG0174,KEGG:K01915,TIGR:TIGR00653 Glutamine synthetase	7.4	2.4	0	0	5.4	5.4	0	0	0	0	13.2	14.5	0	0	0	0	7.9	6.3	0	0	0	0	4.5	3.6
CLST009536 TIGR:TIGR01169,COG:COG0081,KEGG:K02863 Ribosomal protein L1	8.5	4.7	2	3.1	4.5	0	0	0	0	0	18.6	21.2	0	0	0	0	14.6	9.5	0	0	0	0	4.5	7.1
CLST009537 TIGR:TIGR00855,KEGG:K02935,COG:COG0222 Ribosomal protein L7/L12	20.2	13	11.3	21.6	24.2	10	19.2	12.9	3.7	5.5	48.2	32.4	0	0	0	0	21.4	20.1	0.9	0	0	0	5.4	8.9
CLST009607 TIGR:TIGR00021,KEGG:K01807,COG:COG0120 Ribose 5-phosphate isomerase	0	0	0	4.1	4.5	0	0	0	0	0	0	4.5	0	0	0	0	3.4	3.2	0	0	0	0	0	0
CLST009702 KEGG:K02906,COG:COG0087,TIGR:TIGR03625 Ribosomal protein L3	0	0	0	0	0	0	0	0	0	0	3.3	2.2	0	0	0	0	0	3.2	0	0	0	0	0	0
CLST009726 PFAM:PF03894.8,PFAM:PF09363.3,KEGG:K01636,KEGG:K01632,PFAM:PF09364.3,COG:COG3957 Phosphoketolase	18	15.3	15.4	16.5	17.9	20.9	6	0	0	0	20.8	4.5	0	0	0	0	12.4	15.8	0	0	0	0	10.8	10.7
CLST009735 COG:COG0197,TIGR:TIGR01164,KEGG:K02878 Ribosomal protein L16/L10E	0	0	0	0	2.7	5.4	0	0	0	0	4.4	0	0	0	0	0	3.4	0	0	0	0	0	0	0
CLST009743 TIGR:TIGR02027,COG:COG0202,KEGG:K03040 DNA-directed RNA polymerase, alpha subunit/40 kD subunit	3.2	0	3.1	0	4.5	6.3	2	0	0	0	6.6	2.2	0	0	0	0	2.3	0	0	0	0	0	0	0
CLST009780 KEGG:K02994,COG:COG0096,PFAM:PF00410.12 Ribosomal protein S8	4.2	0	0	0	1.8	0	0	0	0	0	7.7	13.4	0	0	0	0	9	6.3	0	0	0	0	0.9	0
CLST009787 TIGR:TIGR00060,COG:COG0256,KEGG:K02881 Ribosomal protein L18	7.4	7.1	3.1	2.1	4.5	1.8	4	4.9	0	5.5	16.4	27.9	0	0	0	0	12.4	7.4	0	0	0	0	1.8	0
CLST009819 COG:COG0098,KEGG:K02988,TIGR:TIGR01021 Ribosomal protein S5	0	2.4	0	0	3.6	0	0	0	0	0	0	2.2	0	0	0	0	5.6	4.2	0	0	0	0	0	0
CLST009826 TIGR:TIGR00204,COG:COG3959,TIGR:TIGR03186,KEGG:K00615,PFAM:PF00456.14,TIGR:TIGR00232,TIGR:TIGR00759 Transketolase, N-terminal subunit	13.8	2.4	11.3	12.4	0	0	0	0	0	0	4.4	0	6	2.1	0	0	3.4	0	4.5	2.7	0	0	0	0
CLST009866 COG:COG0588,TIGR:TIGR01258,KEGG:K01834 Phosphoglycerate mutase 1	4.2	2.4	4.1	3.1	9.9	6.3	0	2	0	0	12.1	16.7	0	0	0	0	3.4	5.3	0	2.7	0	0	7.2	6.2
CLST009943 COG:COG1217,TIGR:TIGR01394,KEGG:K06207 Predicted membrane GTPase involved in stress response	0	0	0	0	0	0	0	0	0	0	2.2	0	0	0	0	0	0	0	0	0	0	0	0	0
CLST009973 COG:COG0540,KEGG:K00609,TIGR:TIGR00670 Aspartate carbamoyltransferase, catalytic chain	0	0	7.2	4.1	3.6	2.7	0	0	0	0	2.2	3.3	0	0	0	0	0	0	0	0	0	0	0	0.9
CLST009998 KEGG:K02520,PFAM:PF00707.15,COG:COG0290,TIGR:TIGR00168,PFAM:PF05198.9 Translation initiation factor 3 (IF-3)	0	0	3.1	0	0	0	0	0	0	0	3.3	8.9	0	0	0	0	0	2.1	0	0	0	0	0	0
CLST010014 TIGR:TIGR01851,TIGR:TIGR01850,KEGG:K00145,COG:COG0002 Acetylglutamate semialdehyde dehydrogenase	0	0	3.1	3.1	0	0	0	0	0	0	0	0	0	0	0	0	0	0	0	0	0	0	0	0
CLST010051 PFAM:PF02610.8,COG:COG2160,PFAM:PF11762.1,KEGG:K01804 L-arabinose isomerase	5.3	0	5.1	5.1	0	0	0	0	0	0	0	0	1	0	0	2	0	0	0	2.7	18	13.1	0	0
CLST010063 hypothetical protein	0	0	0	0	0	0	0	0	0	0	0	0	0	0	0	0	0	0	0	0	0	0	0.9	0
CLST010087 COG:COG1837,KEGG:K06960 Predicted RNA-binding protein (contains KH domain)	0	0	0	0	0	0	0	0	0	0	0	3.3	0	0	0	0	4.5	5.3	0	0	0	0	0	0
CLST010113 hypothetical protein	0	0	0	0	0	0	0	0	0	0	0	0	0	0	2.1	0	0	0	0	0	0	0	0	0
CLST010191 TIGR:TIGR01251,COG:COG0462,KEGG:K00948 Phosphoribosylpyrophosphate synthetase	0	0	0	0	0	0	0	0	0	0	0	2.2	0	0	0	0	0	0	0	0	0	0	0	0
CLST010211 TIGR:TIGR01079,COG:COG0198,KEGG:K02895 Ribosomal protein L24	8.5	11.8	11.3	6.2	9.9	10	9.1	4.9	8.2	7.3	16.4	19	0	0	0	0	25.9	15.8	0	0	0	0	6.3	7.1
CLST010229 KEGG:K02992,TIGR:TIGR01029,COG:COG0049 Ribosomal protein S7	9.6	10.6	3.1	0	10.8	15.4	2	0	0.9	1.8	13.2	10	0	0	0	0	5.6	12.7	0	0	0	0	10.8	7.1
CLST010230 KEGG:K02892,PFAM:PF00276.13,COG:COG0089,TIGR:TIGR03636 Ribosomal protein L23	6.4	8.3	0	3.1	6.3	6.3	5	4.9	4.6	4.6	9.9	6.7	0	0	0	0	18	19	0	0	0	0	3.6	2.7
CLST010241 TIGR:TIGR00484,KEGG:K02355,COG:COG0480 Translation elongation factors (GTPases)	6.4	2.4	7.2	8.2	8.1	6.3	4	4	0	0	15.4	21.2	0	0	0	0	6.8	6.3	0	0	0	0	6.3	7.1
CLST010242 TIGR:TIGR00499,KEGG:K01876,TIGR:TIGR00459,COG:COG0173 Aspartyl-tRNA synthetase	0	2.4	3.1	2.1	0	0	0	0	0	0	3.3	0	0	0	0	0	0	0	0	0	0	0	0	0
CLST010274 KEGG:K02990,PFAM:PF01250.10,COG:COG0360 Ribosomal protein S6	9.6	8.3	4.1	6.2	10.8	9.1	9.1	7.9	5.5	2.7	16.4	27.9	0	0	0	0	31.5	26.4	0	0	0	0	1.8	2.7
CLST010290 TIGR:TIGR00062,KEGG:K02899,COG:COG0211 Ribosomal protein L27	0	2.4	0	0	0	0	0	0	2.7	0	11	2.2	0	0	0	0	11.3	16.9	0	0	0	0	0	0
CLST010321 PFAM:PF00719.12,KEGG:K01507,COG:COG0221 Inorganic pyrophosphatase	0	0	0	0	1.8	1.8	0	0	0	0	0	0	0	0	0	0	0	0	0	0	0	0	0	0
CLST010330 COG:COG0103,KEGG:K02996,PFAM:PF00380.12 Ribosomal protein S9	0	0	2	2.1	2.7	0	2	0	0	0	3.3	0	0	0	0	0	0	0	0	0	0	0	1.8	2.7
CLST010362 COG:COG0614,KEGG:K02016 ABC-type Fe3+-hydroxamate transport system, periplasmic component	0	0	0	0	0	0	0	0	0	0	0	0	0	1.1	0	0	0	0	0	0	0	0	0	0
CLST010374 COG:COG0459,KEGG:K04077,TIGR:TIGR02348 Chaperonin GroEL (HSP60 family)	22.3	27.1	13.3	9.3	16.1	14.5	17.1	13.9	2.7	0	53.7	40.2	0	1.1	0	0	34.9	28.5	0.9	0	0	0	20.6	17.8
CLST010437 COG:COG0050,KEGG:K02358,TIGR:TIGR00485,TIGR:TIGR00475 GTPases - translation elongation factors	7.4	5.9	5.1	1	9	8.2	3	0	0	0.9	9.9	8.9	0	0	0	0	3.4	3.2	0	0	0	0	1.8	7.1
CLST010471 KEGG:K03530,PFAM:PF00216.14,TIGR:TIGR00988,COG:COG0776 Bacterial nucleoid DNA-binding protein	19.1	28.3	10.2	9.3	13.4	18.1	9.1	3	11.9	10.1	43.9	45.7	0	4.3	0	0	72.1	69.7	0	0	0	0	1.8	4.4
CLST010481 KEGG:K10794,NOG:NOG135588,NOG:NOG40704 Reductase	7.4	8.3	3.1	0	0	0	0	0	0	0	0	0	1	2.1	0	0	0	0	0	0	0	2.2	0	0
CLST010485 KEGG:K02112,COG:COG0055,TIGR:TIGR01039 F0F1-type ATP synthase, beta subunit	2.1	1.2	2	1	0	0.9	1	1	0	0	7.7	16.7	0	0	7.2	6.1	3.4	1.1	0	0	0	0	0	2.7
CLST010492 PFAM:PF00587.18,KEGG:K01880,COG:COG0423,TIGR:TIGR00389 Glycyl-tRNA synthetase (class II)	0	0	0	0	0	0	0	0	0	0	0	2.2	0	0	0	0	0	0	0	0	0	0	0	0
CLST010501 TIGR:TIGR01044,KEGG:K02890,COG:COG0091 Ribosomal protein L22	5.3	5.9	0	0	4.5	5.4	4	3	5.5	4.6	16.4	11.2	0	0	0	0	9	7.4	0	0	0	0	0	0
CLST010523 KEGG:K02887,TIGR:TIGR01032,COG:COG0292 Ribosomal protein L20	0	2.4	0	2.1	3.6	6.3	0	0	0	0	6.6	2.2	0	0	0	0	2.3	3.2	0	0	0	0	0	0
CLST010530 KEGG:K02356,COG:COG0231,TIGR:TIGR00038 Translation elongation factor P (EF-P)/translation initiation factor 5A (eIF-5A)	0	0	0	0	0	0.9	0	0	0	0	0	0	0	0	0	0	0	0	0	0	0	0	0	0
CLST010557 PFAM:PF00673.14,COG:COG0094,PFAM:PF00281.12,KEGG:K02931 Ribosomal protein L5	0	0	2	2.1	3.6	4.5	0	2	0	0	7.7	4.5	0	0	0	0	0	2.1	0	0	0	0	2.7	1.8
CLST010558 COG:COG0203,TIGR:TIGR00059,KEGG:K02879 Ribosomal protein L17	0	5.9	9.2	4.1	5.4	4.5	2	3	1.8	1.8	14.3	15.6	0	0	0	0	2.3	6.3	0	0	0	0	4.5	3.6
CLST010622 TIGR:TIGR02696,COG:COG1185,KEGG:K00962,TIGR:TIGR03591 Polyribonucleotide nucleotidyltransferase (polynucleotide phosphorylase)	0	0	0	0	5.4	4.5	1	0	0	0	3.3	2.2	0	0	0	0	0	2.1	0	0	0	0	0	0.9
CLST010650 COG:COG0148,KEGG:K01689,TIGR:TIGR01060 Enolase	12.7	13	9.2	8.2	17.9	13.6	7.1	3	0	1.8	20.8	23.4	0	0	0	0	10.1	14.8	0	0	0	0	4.5	8.9
CLST010660 KEGG:K03046,TIGR:TIGR02389,TIGR:TIGR02388,COG:COG0086,TIGR:TIGR02386 DNA-directed RNA polymerase, beta subunit/160 kD subunit	2.1	0	3.1	3.1	1.8	1.8	0	2	0	0	3.3	1.1	2	0	0	0	2.3	0	0	0	0	0	0.9	1.8
CLST010685 PFAM:PF00342.12,COG:COG0166,KEGG:K01810 Glucose-6-phosphate isomerase	9.6	7.1	6.1	6.2	6.3	5.4	0	0	0	0	6.6	5.6	0	0	0	0	4.5	4.2	0	0	0	0	0	4.4
CLST010706 TIGR:TIGR01171,COG:COG0090,KEGG:K02886 Ribosomal protein L2	6.4	3.5	2	4.1	2.7	3.6	0	0	0	0	8.8	6.7	0	0	0	0	9	7.4	0	0	0	0	0	2.7
CLST010709 TIGR:TIGR01771,COG:COG0039,KEGG:K00016 Malate/lactate dehydrogenases	2.1	2.4	0	0	0	2.7	0	0	0	0	2.2	4.5	0	0	0	0	4.5	0	0	0	0	0	0	0
CLST010718 TIGR:TIGR01132,COG:COG0033,KEGG:K01835 Phosphoglucomutase	3.2	2.4	2	0	1.8	1.8	0	0	0	0	6.6	4.5	0	0	0	0	0	0	0	0	0	0	0	2.7
CLST010750 KEGG:K04078,PFAM:PF00166.14,COG:COG0234 Co-chaperonin GroES (HSP10)	2.1	4.7	0	2.1	5.4	4.5	5	6.9	4.6	4.6	17.5	17.9	0	0	0	0	27	13.7	0	0	0	0	2.7	1.8
CLST010852 PFAM:PF06071.6,COG:COG0012,KEGG:K06942,TIGR:TIGR00092 Predicted GTPase, probable translation factor	0	0	0	0	0	0	0	0	0	0	0	0	0	0	0	0	0	2.1	0	0	0	0	0	0
CLST010872 KEGG:K02982,TIGR:TIGR01009,COG:COG0092 Ribosomal protein S3	6.4	3.5	0	4.1	1.8	3.6	2	0	0	0	13.2	13.4	0	0	0	0	5.6	0	0	0	0	0	3.6	2.7
CLST010885 TIGR:TIGR01534,COG:COG0057,KEGG:K00134 Glyceraldehyde-3-phosphate dehydrogenase/erythrose-4-phosphate dehydrogenase	13.8	14.2	0	0	17.9	17.2	7.1	4	2.7	4.6	12.1	13.4	0	0	0	0	12.4	10.6	0	0	0	0	7.2	11.6
CLST010899 COG:COG0268,KEGG:K02968,TIGR:TIGR00029 Ribosomal protein S20	3.2	0	0	0	7.2	13.6	4	2	2.7	11	4.4	10	0	0	0	0	10.1	11.6	0	0	0	0	0	0
CLST010927 COG:COG1758,KEGG:K03060,TIGR:TIGR00690 DNA-directed RNA polymerase, subunit K/omega	0	0	0	0	0	0	0	0	0	0	8.8	7.8	0	0	0	0	4.5	5.3	0	0	0	0	0	0
CLST010934 PFAM:PF07497.5,COG:COG1158,KEGG:K03628,PFAM:PF07498.5,TIGR:TIGR00767 Transcription termination factor	0	0	0	0	0	0	0	0	0	0	0	0	0	0	0	0	0	0	0	1.8	0	0	0	0.9
CLST010945 TIGR:TIGR01192,TIGR:TIGR01187,TIGR:TIGR03375,TIGR:TIGR03410,TIGR:TIGR00958,TIGR:TIGR03265,TIGR:TIGR00968,KEGG:K10243,TIGR:TIGR02203,COG:COG3839,TIGR:TIGR02857 ABC-type sugar transport systems, ATPase components	7.4	8.3	8.2	5.1	16.1	20.9	4	4.9	0.9	0	9.9	10	1	0	0	0	4.5	2.1	0	0	0	0	11.7	16.9
CLST010971 COG:COG0235,TIGR:TIGR02624,KEGG:K01629 Ribulose-5-phosphate 4-epimerase and related epimerases and aldolases	0	0	0	0	0	0	0	0	0	0	0	0	0	0	0	0	0	0	0	0	0	0	1.8	0
CLST011009 COG:COG0064,TIGR:TIGR00133,PFAM:PF02934.8,KEGG:K02434,PFAM:PF02637.11 Asp-tRNAAsn/Glu-tRNAGln amidotransferase B subunit (PET112 homolog)	2.1	0	0	0	2.7	1.8	0	0	0	0	3.3	3.3	0	0	0	0	0	0	0	0	0	0	0	1.8
CLST011133 KEGG:K00688,COG:COG0058,TIGR:TIGR02093 Glucan phosphorylase	6.4	2.4	4.1	3.1	0	0	0	0	0	0	2.2	0	0	0	0	0	4.5	3.2	0	0	0	0	0	0
CLST011135 PFAM:PF00162.12,COG:COG0126,KEGG:K00927 3-phosphoglycerate kinase	8.5	11.8	8.2	10.3	10.8	8.2	7.1	4	0	0	23	23.4	0	0	0	0	13.5	17.9	0	0	0	0	3.6	4.4
CLST011172 COG:COG0539,KEGG:K02945,TIGR:TIGR00717 Ribosomal protein S1	3.2	3.5	7.2	6.2	8.1	3.6	2	2	0	0	15.4	15.6	0	0	0	0	2.3	2.1	0	0	0	0	4.5	5.3
CLST011216 TIGR:TIGR03630,TIGR:TIGR03635,KEGG:K02961,COG:COG0186 Ribosomal protein S17	6.4	3.5	0	0	10.8	8.2	0	4	5.5	11.9	6.6	5.6	0	0	0	0	12.4	9.5	0	0	0	1.1	0.9	0.9
CLST011266 TIGR:TIGR03346,COG:COG0542,KEGG:K03695,PFAM:PF02861.13 ATPases with chaperone activity, ATP-binding subunit	0	0	0	0	1.8	0	0	0	0	0	2.2	0	0	0	0	0	0	0	0	0	0	0	0.9	0
CLST011291 COG:COG1592,PFAM:PF02915.10,COG:COG1853,KEGG:K00532,COG:COG0426 Rubrerythrin	0	2.4	0	9.3	9	6.3	7.1	4.9	2.7	0	14.3	13.4	4	3.2	3.1	2	0	3.2	11.7	10.9	0	0	3.6	4.4
CLST011431 NOG:NOG46075 Annotation not available	2.1	2.4	2	5.1	0	0	0	0	0	0	0	0	4	1.1	3.1	2	0	0	0	0	3.2	3.3	0	0
CLST011536 PFAM:PF00725.15,TIGR:TIGR02279,COG:COG1250,KEGG:K00074,PFAM:PF02737.11 3-hydroxyacyl-CoA dehydrogenase	0	0	0	0	3.6	3.6	0	0	0	0	0	0	0	0	0	0	0	0	0	0	8.5	6.5	0	0
CLST011577 KEGG:K09157,PFAM:PF05167.5,COG:COG2848 Uncharacterized conserved protein	0	0	0	0	0	0	0	0	0	0	0	0	2	0	0	0	0	0	0	0	0	0	0	0
CLST011588 KEGG:K00951,PFAM:PF02824.14,TIGR:TIGR00691,COG:COG0317 Guanosine polyphosphate pyrophosphohydrolases/synthetases	0	0	0	1	0	0	0	0	0	0	0	0	0	0	0	0	0	0	0	0	0	0	0	0
CLST011750 KEGG:K10793,NOG:NOG135942 D-Proline reductase	4.2	2.4	0	0	0	0	0	0	0	0	0	0	2	3.2	0	0	0	0	3.6	5.4	0	0	1.8	0
CLST011801 COG:COG0474,TIGR:TIGR01647,TIGR:TIGR01522,TIGR:TIGR01652,PFAM:PF00690.19,KEGG:K01537,TIGR:TIGR01116,TIGR:TIGR01523 Cation transport ATPase	0	0	0	0	0	0	0	0	0	0	0	0	2	0	0	0	0	0	0	0	0	0	0	0
CLST011804 COG:COG0080,TIGR:TIGR01632,KEGG:K02867 Ribosomal protein L11	0	0	0	0	2.7	0	0	0	0	0	5.5	3.3	0	0	0	0	3.4	3.2	0	0	0	0	0	0
CLST011808 TIGR:TIGR02323,TIGR:TIGR01186,TIGR:TIGR03740,COG:COG1129,KEGG:K10542,PFAM:PF00005.20,TIGR:TIGR02314,TIGR:TIGR03269,TIGR:TIGR02633 ABC-type sugar transport system, ATPase component	0	0	9.2	7.2	0	0	0	0	0	0	3.3	5.6	0	0	8.2	3	3.4	0	3.6	7.2	0	0	0	1.8
CLST011912 COG:COG0039,KEGG:K00026 Malate/lactate dehydrogenases	0	5.9	0	0	0	0	0	0	0	0	0	0	0	0	0	3	0	0	0	0	0	0	0	0
CLST011959 PFAM:PF01266.17,KEGG:K07137,PFAM:PF07992.7,COG:COG2509 Uncharacterized FAD-dependent dehydrogenases	0	0	2	2.1	0	0	0	0	0	0	0	0	0	0	0	0	0	0	0	0	0	0	0	0
CLST012006 COG:COG0436,KEGG:K10206,TIGR:TIGR03542 Aspartate/tyrosine/aromatic aminotransferase	5.3	5.9	13.3	6.2	0	0	0	0	0	0	5.5	2.2	3	2.1	0	0	5.6	3.2	3.6	1.8	0	0	0	1.8
CLST012022 COG:COG0261,PFAM:PF00829.14,KEGG:K02888 Ribosomal protein L21	5.3	2.4	3.1	3.1	2.7	0	4	4	2.7	2.7	11	21.2	0	0	0	0	9	11.6	0	0	0	0	0.9	0
CLST012027 TIGR:TIGR00503,COG:COG4108,KEGG:K02837 Peptide chain release factor RF-3	0	0	2	0	0	0	0	0	0	0	0	0	0	0	0	0	0	0	0	0	0	0	0	0
CLST012029 KEGG:K02956,TIGR:TIGR00952,COG:COG0184 Ribosomal protein S15P/S13E	3.2	0	2	0	1.8	3.6	0	3	2.7	2.7	5.5	11.2	0	0	0	0	5.6	7.4	0	0	0	0	0	0
CLST012036 KEGG:K00528,PFAM:PF10418.2,COG:COG0543,KEGG:K00266,TIGR:TIGR01316 2-polyprenylphenol hydroxylase and related flavodoxin oxidoreductases	0	0	0	0	0	0	0	0	0	0	0	0	0	0	0	0	0	0	0	0	2.1	2.2	1.8	0
CLST012047 KEGG:K02600,COG:COG0195,TIGR:TIGR01953 Transcription elongation factor	2.1	0	4.1	3.1	0	0	0	0	0	0	0	0	0	0	0	0	0	3.2	0	0	0	0	0	0
CLST012119 KEGG:K02835,COG:COG0216,TIGR:TIGR00019 Protein chain release factor A	0	0	2	2.1	0	0	0	0	0	0	0	0	0	0	0	0	0	0	0	0	0	0	0	0
CLST012363 PFAM:PF00132.17,COG:COG0448,KEGG:K00975,TIGR:TIGR02091 ADP-glucose pyrophosphorylase	3.2	2.4	5.1	3.1	0	0	0	0	0	1.8	2.2	1.1	0	0	0	0	0	0	0	0	0	0	1.8	0
CLST012367 COG:COG0102,KEGG:K02871,TIGR:TIGR01066 Ribosomal protein L13	3.2	0	0	0	3.6	1.8	0	2	0	0	7.7	8.9	0	0	0	0	4.5	6.3	0	0	0	0	0	0
CLST012380 COG:COG0264,KEGG:K02357,TIGR:TIGR00116 Translation elongation factor Ts	2.1	4.7	4.1	0	3.6	7.3	4	0	0	0	16.4	20.1	0	0	0	0	2.3	2.1	0	0	0	0	0	0
CLST012416 KEGG:K01755,TIGR:TIGR00838,COG:COG0165 Argininosuccinate lyase	0	1.2	1	0	0	0	0	0	0	0	0	0	0	0	0	0	0	0	0	0	0	0	0	0
CLST012417 KEGG:K02838,TIGR:TIGR00496,COG:COG0233 Ribosome recycling factor	4.2	2.4	0	0	1.8	5.4	2	0	0	0	2.2	11.2	0	0	0	0	4.5	5.3	0	0	0	0	0	0
CLST012419 KEGG:K00262,PFAM:PF02812.11,COG:COG0334,PFAM:PF00208.14 Glutamate dehydrogenase/leucine dehydrogenase	4.2	1.2	2	0	3.6	4.5	0	1	0	0	0	5.6	0	0	0	0	0	0	0.9	0	0	0	1.8	1.8
CLST012434 PFAM:PF03861.7,KEGG:K07183,COG:COG3707 Response regulator with putative antiterminator output domain	3.2	0	0	0	0	0	0	0	0	0	2.2	6.7	0	0	0	0	0	0	0	0	0	0	0	0
CLST012457 KEGG:K04567,COG:COG1190,TIGR:TIGR00458,TIGR:TIGR00462,TIGR:TIGR00499,TIGR:TIGR00459 Lysyl-tRNA synthetase (class II)	0	0	0	0	0	0	0	0	0	0	0	3.3	0	0	0	0	0	0	0	0	0	0	0	0
CLST012473 TIGR:TIGR01040,KEGG:K02147,TIGR:TIGR01041,KEGG:K02118,TIGR:TIGR03498,COG:COG1156 Archaeal/vacuolar-type H+-ATPase subunit B	6.4	0	3.1	3.1	0	0	0	0	0	0	0	0	0	0	0	0	0	2.1	1.8	1.8	0	0	0	0
CLST012511 KEGG:K02876,COG:COG0200,TIGR:TIGR01071 Ribosomal protein L15	0	0	0	0	5.4	0	0	2	0	0	12.1	4.5	0	0	0	0	0	0	0	0	0	0	0	0
CLST012513 TIGR:TIGR01024,COG:COG0335,KEGG:K02884 Ribosomal protein L19	0	0	7.2	5.1	6.3	9.1	7.1	4	2.7	2.7	15.4	17.9	0	0	0	0	6.8	6.3	0	0	0	0	0	0.9
CLST012527 KEGG:K01710,TIGR:TIGR02622,TIGR:TIGR01181,COG:COG1088 dTDP-D-glucose 4,6-dehydratase	0	0	0	0	0	0	0	0	0	0	0	0	0	0	0	2	0	0	0	0	0	0	0	0
CLST012561 COG:COG0540,TIGR:TIGR03316,KEGG:K00609,TIGR:TIGR00670 Aspartate carbamoyltransferase, catalytic chain	0	0	0	0	0	0	0	0	0	0	0	1.1	0	0	0	0	0	0	0	0	0	0	0	0
CLST012569 KEGG:K00425,COG:COG1271,PFAM:PF01654.10 Cytochrome bd-type quinol oxidase, subunit 1	0	0	0	0	0	0	0	0	0	0	0	0	0	0	0	0	0	0	3.6	1.8	0	0	0	0
CLST012587 COG:COG0673 Predicted dehydrogenases and related proteins	7.4	7.1	0	0	0	0	0	0	0	0	0	0	0	0	0	0	0	0	0	3.6	0	0	1.8	1.8
CLST012592 KEGG:K11065,COG:COG2077 Peroxiredoxin	2.1	2.4	0	0	0	0	0	0	0	0	0	0	0	0	0	0	0	0	0	0	0	0	0	0
CLST012604 KEGG:K03531,TIGR:TIGR00065,COG:COG0206 Cell division GTPase	0	0	0	0	0	0	0	0	0	0	2.2	2.2	0	0	0	0	0	0	0.9	0	0	0	0	0
CLST012625 TIGR:TIGR01123,KEGG:K00826,COG:COG0115 Branched-chain amino acid aminotransferase/4-amino-4-deoxychorismate lyase	4.2	0	0	0	0	0	0	0	0	0	0	0	0	0	0	0	0	0	0	0	0	0	0	0
CLST012627 TIGR:TIGR03723,COG:COG0533,KEGG:K01409 Metal-dependent proteases with possible chaperone activity	0	0	2	0	0	0	0	0	0	0	0	0	0	0	0	0	0	0	0	0	0	0	0	0
CLST012648 hypothetical protein	8.5	2.4	5.1	3.1	0	1.8	5	3	6.4	10.1	15.4	20.1	0	2.1	0	0	0	0	10.8	16.3	7.4	16.3	2.7	0
CLST012657 COG:COG0589,PFAM:PF00582.19 Universal stress protein UspA and related nucleotide-binding proteins	0	0	0	0	0	0	0	0	0	0	0	0	0	0	0	0	0	0	0	1.8	0	0	0	0
CLST012664 COG:COG0244,KEGG:K02864 Ribosomal protein L10	8.5	8.3	8.2	4.1	12.5	9.1	4	4.9	2.7	1.8	13.2	20.1	0	0	0	0	11.3	13.7	0	0	0	0	3.6	1.8
CLST012706 KEGG:K00027,COG:COG0281,PFAM:PF03949.8 Malic enzyme	2.1	0	0	3.1	0	0	0	0	0	0	0	0	0	0	0	0	0	0	0	0	0	0	0	0
CLST012733 KEGG:K02601,TIGR:TIGR00922,COG:COG0250 Transcription antiterminator	0	0	0	0	0	0	0	0	0	0	0	0	0	0	0	0	2.3	0	0	0	0	0	0	0
CLST012747 COG:COG1544 Ribosome-associated protein Y (PSrp-1)	5.3	7.1	4.1	2.1	11.6	9.1	2	0	0	0	14.3	6.7	0	0	0	0	10.1	7.4	0	0	0	0	2.7	6.2
CLST012750 KEGG:K01710,TIGR:TIGR01181,COG:COG1088 dTDP-D-glucose 4,6-dehydratase	0	0	5.1	7.2	0	0	0	0	0	0	0	0	0	3.2	4.1	0	0	0	0	0	0	0	0	0
CLST012755 COG:COG0205,PFAM:PF00365.13,TIGR:TIGR02478,TIGR:TIGR02482,KEGG:K00850,TIGR:TIGR02483 6-phosphofructokinase	2.1	3.5	2	5.1	3.6	3.6	0	0	3.7	3.7	0	0	0	0	0	2	0	0	0	0	0	0	0	0
CLST012764 TIGR:TIGR00012,PFAM:PF00831.16,KEGG:K02904,COG:COG0255 Ribosomal protein L29	7.4	7.1	0	0	8.1	7.3	3	5.9	12.8	13.7	20.8	13.4	0	0	0	0	27	17.9	0	0	0	0	0	2.7
CLST012769 COG:COG1012,PFAM:PF00465.12,TIGR:TIGR02638,TIGR:TIGR02518,KEGG:K04072,COG:COG1454 Alcohol dehydrogenase, class IV	2.1	0	7.2	5.1	0.9	3.6	0	0	0	0	4.4	4.5	0	0	0	0	0	2.1	0	0	0	0	0.9	0.9
CLST012780 KEGG:K01591,COG:COG0284,TIGR:TIGR02127 Orotidine-5-phosphate decarboxylase	3.2	0	10.2	7.2	0	0	2	0	0	0	0	0	0	0	4.1	0	4.5	5.3	2.7	0	0	0	0	0
CLST012782 KEGG:K02600,COG:COG0195,TIGR:TIGR01953 Transcription elongation factor	0	0	3.1	2.1	1.8	0	0	0	0	0	0	5.6	0	0	0	0	0	0	0	0	0	0	0	0
CLST012813 COG:COG0217,TIGR:TIGR01033 Uncharacterized conserved protein	0	0	0	0	1.8	0	0	0	0	0	0	3.3	0	0	0	0	2.3	0	0	0	0	0	0	0
CLST012824 PFAM:PF02810.8,KEGG:K03070,PFAM:PF07516.6,TIGR:TIGR00963,COG:COG0653,TIGR:TIGR03714 Preprotein translocase subunit SecA (ATPase, RNA helicase)	0	0	0	0	1.8	0	0	0	0	0	0	2.2	0	0	0	0	0	0	0	0	0	0	0	1.8
CLST012885 TIGR:TIGR01179,KEGG:K01784,COG:COG1087 UDP-glucose 4-epimerase	2.1	0	0	2.1	0	0	0	0	0	0	0	2.2	0	0	0	0	3.4	0	0	0	0	0	0	0
CLST012921 hypothetical protein	0	0	0	0	0	0	0	0	0	0	0	0	0	0	0	0	0	0	0.9	0.9	0	0	0	0
CLST012926 COG:COG0088,KEGG:K02926,PFAM:PF00573.15 Ribosomal protein L4	2.1	0	3.1	0	0	0	2	0	0	0	17.5	13.4	0	0	0	0	5.6	8.4	0	0	0	0	0	3.6
CLST012960 TIGR:TIGR01064,COG:COG0469,KEGG:K00873 Pyruvate kinase	9.6	10.6	8.2	4.1	10.8	10.9	5	0	0	0	18.6	22.3	0	0	0	0	11.3	9.5	0	0	0	0	11.7	8
CLST012962 PFAM:PF07664.5,PFAM:PF02421.11,PFAM:PF07670.7,COG:COG0370,KEGG:K04759,TIGR:TIGR00437 Fe2+ transport system protein B	0	0	1	0	0	0	0	0	0	0.9	2.2	2.2	0	0	0	0	0	0	1.8	0.9	0	0	0	1.8
CLST012976 PFAM:PF00588.12,KEGG:K03218,TIGR:TIGR00186,COG:COG0566 rRNA methylases	0	0	0	0	2.7	0	0	0	0	0	2.2	0	0	0	0	0	0	0	0	0	0	0	1.8	1.8
CLST013061 KEGG:K03545,TIGR:TIGR00115,COG:COG0544 FKBP-type peptidyl-prolyl cis-trans isomerase (trigger factor)	0	4.7	0	0	0	0	0	0	0	0	0	0	0	0	0	0	0	0	1.8	2.7	0	0	0	0
CLST013139 KEGG:K00549,COG:COG0620 Methionine synthase II (cobalamin-independent)	0	0	2	0	0	0	0	0	0	0	5.5	3.3	0	0	0	0	0	0	0.9	1.8	0	0	0	0
CLST013200 TIGR:TIGR03405,COG:COG1012,PFAM:PF00465.12,TIGR:TIGR02638,TIGR:TIGR02518,KEGG:K04072,COG:COG1454 Alcohol dehydrogenase, class IV	24.4	26	9.2	9.3	5.4	2.7	4	3	12.8	11.9	15.4	19	8	9.6	7.2	6.1	0	0	9.9	10.9	16.9	20.7	26	29.4
CLST013202 TIGR:TIGR00744,KEGG:K00886,COG:COG1940 Transcriptional regulator/sugar kinase	0	0	0	0	0	0	0	0	0	0	2.2	2.2	0	0	0	0	2.3	3.2	0	0	0	0	0	0
CLST013216 COG:COG0681,TIGR:TIGR02227,KEGG:K03100,PFAM:PF00717.16 Signal peptidase I	0	0	0	2.1	0	0	0	0	0	0	0	0	0	0	0	0	0	0	0	0	0	0	0	0
CLST013219 PFAM:PF10385.2,PFAM:PF04565.9,KEGG:K03043,TIGR:TIGR03670,PFAM:PF04560.13,TIGR:TIGR02013,COG:COG0085,PFAM:PF00562.21,PFAM:PF04561.7 DNA-directed RNA polymerase, beta subunit/140 kD subunit	0	0	0	0	0	0	1	0	0	0	0	0	0	0	0	0	0	0	2.7	0.9	0	0	3.6	2.7
CLST013224 COG:COG0342,KEGG:K12257,PFAM:PF07549.7,TIGR:TIGR01129,COG:COG0341,PFAM:PF02355.9,TIGR:TIGR00966,TIGR:TIGR00916 Preprotein translocase subunit SecD	0	0	0	0	0	0	0	0	0	0	0	0	0	0	0	0	0	0	2.7	1.8	0	0	0.9	0
CLST013270 TIGR:TIGR03303,PFAM:PF07244.8,COG:COG4775,KEGG:K07277 Outer membrane protein/protective antigen OMA87	0	0	0	0	0	0	0	0	0	0	0	0	2	0	0	0	0	0	0	0	0	0	0	0
CLST013335 hypothetical protein	0	0	0	0	0	0	0	0	0	0	0	0	0	0	0	0	0	0	0.9	0	0	0	0	0
CLST013336 TIGR:TIGR01241,COG:COG0465,NOG:NOG135223,KEGG:K03798 Annotation not available	2.1	0	0	0	0	0	0	0	0	0	0	0	0	0	0	0	0	0	0	0	0	0	0	0
CLST013364 COG:COG1875,KEGG:K07175 Predicted ATPase related to phosphate starvation-inducible protein PhoH	5.3	2.4	0	0	0	0	0	0	0	0	0	0	0	0	0	0	0	0	3.6	1.8	0	0	0	0
CLST013366 PFAM:PF00465.12,KEGG:K00100,TIGR:TIGR02638,KEGG:K04072,COG:COG1454 Alcohol dehydrogenase, class IV	24.4	31.9	12.3	6.2	3.6	1.8	2	5.9	1.8	1.8	2.2	3.3	0	10.7	0	0	0	0	14.4	15.4	0	0	4.5	6.2
CLST013420 NOG:NOG69162 Annotation not available	4.2	0	0	0	0	0	0	0	0	0	0	0	0	0	0	0	0	0	1.8	0	0	0	0	0
CLST013467 TIGR:TIGR01044,COG:COG0185,TIGR:TIGR01050,KEGG:K02965 Ribosomal protein S19	0	0	0	2.1	0	0	0	2	6.4	4.6	3.3	0	0	0	0	0	3.4	0	0	0.9	0	1.1	0	0
CLST013502 PFAM:PF07719.10,TIGR:TIGR02521,PFAM:PF00515.21,NOG:NOG41185 Annotation not available	60.5	86.2	16.4	25.7	0	0	0	0	0	0	0	0	64	70.5	43.3	42.6	2.3	1.1	18.9	17.2	58.2	46.8	0.9	0.9
CLST013507 COG:COG0330 Membrane protease subunits, stomatin/prohibitin homologs	0	0	0	0	0	0	0	0	0	0	2.2	3.3	0	0	0	0	0	0	0	0	0	0	0	0
CLST013513 TIGR:TIGR00337,KEGG:K01937,COG:COG0504 CTP synthase (UTP-ammonia lyase)	0	0	4.1	6.2	0	0	0	0	0	0	0	0	0	0	0	0	1.1	0	0	0	0	0	0	0
CLST013550 COG:COG1704,PFAM:PF04011.5,KEGG:K03744 Uncharacterized conserved protein	0	0	0	0	0	0	0	0	0	0	0	0	4	6.4	0	0	0	0	0	0	0	0	0	0
CLST013559 KEGG:K10540,COG:COG1879 ABC-type sugar transport system, periplasmic component	13.8	21.2	7.2	6.2	0	0	8.1	4.9	1.8	1.8	3.3	12.3	11	21.4	39.2	26.4	11.3	9.5	5.4	7.2	2.1	5.4	4.5	2.7
CLST013644 NOG:NOG76270 Annotation not available	11.7	3.5	2	2.1	0	0	0	0	0	0	0	0	0	0	2.1	0	0	0	1.8	5.4	0	0	0	0
CLST013646 PFAM:PF02585.10,COG:COG0363,KEGG:K02564,TIGR:TIGR00502 6-phosphogluconolactonase/Glucosamine-6-phosphate isomerase/deaminase	4.2	2.4	0	2.1	0	0	0	0	0	0	0	0	0	0	0	0	0	0	0	0	0	0	0	0
CLST013665 KEGG:K00522,PFAM:PF00210.17,COG:COG1528 Ferritin-like protein	14.9	27.1	11.3	12.4	0	0	0	0	0	0	0	0	7	7.5	7.2	7.1	0	0	1.8	1.8	0	0	0	0
CLST013695 NOG:NOG70856,KEGG:K02121 Subunit E	5.3	0	0	0	0	0	0	0	0	0	0	0	0	0	0	0	0	0	0	1.8	0	0	0	0
CLST013711 KEGG:K01238,COG:COG3507,PFAM:PF04616.7,KEGG:K01198 Beta-xylosidase	0	0	3.1	2.1	0	0	0	0	0	0	0	0	0	0	0	0	0	0	0	0	2.1	4.4	0	0
CLST013733 hypothetical protein	0	0	0	0	0	0	0	0	0	0	0	0	0	0	2.1	0	0	0	0	0	0	0	0	0
CLST013759 COG:COG0642,TIGR:TIGR02154,PFAM:PF00072.17,KEGG:K11527,COG:COG0784,NOG:NOG76823,TIGR:TIGR02966,TIGR:TIGR02956 Regulator protein	0	0	0	0	0	0	0	0	0	0	0	0	0	0	0	0	0	0	0	0	0	2.2	0	0
CLST013799 TIGR:TIGR00484,KEGG:K02355,COG:COG0480 Translation elongation factors (GTPases)	1.1	0	0	0	0	0	0	0	0	0	0	0	0	0	0	1	0	0	0	0	0	0	2.7	4.4
CLST013810 KEGG:K00088,TIGR:TIGR01304,COG:COG0516 IMP dehydrogenase/GMP reductase	0	0	0	0	0	0	0	0	0	0	3.3	3.3	0	0	0	0	2.3	3.2	0	0	0	0	0	0
CLST013818 TIGR:TIGR00135,PFAM:PF02686.8,KEGG:K02435,COG:COG0721 Asp-tRNAAsn/Glu-tRNAGln amidotransferase C subunit	0	0	0	0	0	0	0	0	2.7	0	0	4.5	0	0	0	0	2.3	3.2	0	0	0	0	0	0
CLST013860 NOG:NOG140091,COG:COG0071 Heat shock protein	8.5	2.4	0	0	0	0	0	0	0	0	0	0	0	0	0	0	0	0	6.3	7.2	0	0	0.9	0.9
CLST013873 KEGG:K03615,TIGR:TIGR01945,COG:COG4656 Predicted NADH:ubiquinone oxidoreductase, subunit RnfC	2.1	0	0	0	0	0	0	0	0	0	0	0	2	1.1	0	0	0	0	0	0	1.1	1.1	0	0
CLST013970 PFAM:PF01658.10,COG:COG1260,PFAM:PF07994.5,KEGG:K01858 Myo-inositol-1-phosphate synthase	0	2.4	0	0	0	0	0	0	0	0	0	0	0	0	0	0	0	0	2.7	2.7	3.2	3.3	0	0
CLST014048 KEGG:K00762,TIGR:TIGR00336,TIGR:TIGR01367,COG:COG0461 Orotate phosphoribosyltransferase	3.2	0	2	2.1	0	0	0	0	0	0	0	0	4	5.3	2.1	0	0	0	0	0	0	0	0	0
CLST014059 PFAM:PF11028.1,NOG:NOG26635 Annotation not available	0	0	0	0	0	0	0	0	0	0	0	0	2	3.2	0	0	0	0	0	0	0	0	0	0
CLST014132 COG:COG1825,TIGR:TIGR00731,KEGG:K02897,PFAM:PF01386.12 Ribosomal protein L25 (general stress protein Ctc)	0	0	0	0	0	0	0	0	0	0	0	0	0	0	0	0	0	0	3.6	4.5	0	0	0	0
CLST014135 hypothetical protein	0	0	0	0	0	0	1	0	0	0	0	0	0	0	0	0	0	0	0	0	0	0	0	0
CLST014207 TIGR:TIGR00069,COG:COG0141,KEGG:K00013 Histidinol dehydrogenase	0	0	0	0	0	0	0	0	0	0	0	2.2	0	0	0	0	0	0	0	0	0	0	0	0
CLST014220 KEGG:K01923,TIGR:TIGR00081,TIGR:TIGR02735,COG:COG0152,PFAM:PF01259.11 Phosphoribosylaminoimidazolesuccinocarboxamide (SAICAR) synthase	2.1	0	0	4.1	0	1.8	0	0	0	0	0	2.2	0	0	0	0	0	0	3.6	7.2	0	0	0	0.9
CLST014222 COG:COG2407,PFAM:PF02952.10 L-fucose isomerase and related proteins	29.7	46	56.4	43.2	4.5	5.4	5	3	0	0	9.9	11.2	21	22.4	1	4.1	0	2.1	12.6	13.6	2.1	7.6	7.2	7.1
CLST014240 KEGG:K00528,TIGR:TIGR03315,TIGR:TIGR01318,COG:COG0493,TIGR:TIGR01316 NADPH-dependent glutamate synthase beta chain and related oxidoreductases	0	0	0	0	0	0	4	0	0	0	5.5	6.7	0	0	0	0	0	0	0	0	0	0	0	0.9
CLST014245 TIGR:TIGR01857,KEGG:K01952,COG:COG0047,COG:COG0046 Phosphoribosylformylglycinamidine (FGAM) synthase, synthetase domain	1.1	0	0	0	0	0	0	0	0	0	2.2	0	0	0	0	0	0	0	0	0	0	0	0	0
CLST014261 TIGR:TIGR02089,TIGR:TIGR00169,TIGR:TIGR00175,TIGR:TIGR02924,COG:COG0473,KEGG:K00052 Isocitrate/isopropylmalate dehydrogenase	6.4	0	0	3.1	0	0	0	0	0	0	0	2.2	0	3.2	0	0	2.3	0	0	0	0	0	0	0
CLST014280 KEGG:K00048,TIGR:TIGR02638,COG:COG1454 Alcohol dehydrogenase, class IV	3.2	3.5	2	2.1	0	1.8	1	0	0	3.7	0	0	0	0	8.2	7.1	0	0	1.8	0.9	0	0	0	0
CLST014282 KEGG:K03527,COG:COG0539,KEGG:K02945,TIGR:TIGR00717,COG:COG0761,TIGR:TIGR00216,PFAM:PF00575.16,TIGR:TIGR03591 Penicillin tolerance protein	47.8	44.8	30.7	34	9	5.4	12.1	8.9	5.5	7.3	25.2	12.3	10	36.3	15.5	14.2	28.2	26.4	12.6	13.6	9.5	12	5.4	6.2
CLST014287 hypothetical protein	0	0	0	0	0	0	0	0	0	0	0	0	0	1.1	0	0	0	0	0	0	0	0	0	0
CLST014301 COG:COG0289,KEGG:K00215,TIGR:TIGR00036,PFAM:PF01113.13 Dihydrodipicolinate reductase	0	0	0	2.1	0	0	0	0	0	0	0	3.3	0	0	0	0	0	0	0	0	0	0	0	0
CLST014308 KEGG:K00688,PFAM:PF11897.1,TIGR:TIGR02094,COG:COG0058 Glucan phosphorylase	0	0	0	0	0	0	0	0	0	0	0	0	2	0	2.1	0	0	0	0	0	0	0	0	0
CLST014322 PFAM:PF10385.2,PFAM:PF04565.9,KEGG:K03043,PFAM:PF04560.13,TIGR:TIGR02013,COG:COG0085,PFAM:PF04561.7,PFAM:PF00562.21 DNA-directed RNA polymerase, beta subunit/140 kD subunit	1.1	0	0	0	0	0	0	0	0	0	0	0	0	0	0	0	0	0	0.9	0	0	0	0	0
CLST014332 KEGG:K02906,TIGR:TIGR03626,COG:COG0087,TIGR:TIGR03625 Ribosomal protein L3	0	0	1	2.1	2.7	2.7	0	0	2.7	0	3.3	7.8	4	5.3	1	4.1	0	1.1	4.5	1.8	1.1	0	0	0
CLST014385 COG:COG0088,KEGG:K02926,PFAM:PF00573.15,TIGR:TIGR03672 Ribosomal protein L4	0	4.7	0	0	0	0	0	0	0	0	3.3	6.7	3	4.3	11.3	9.1	0	0	0	0	0	0	0	0
CLST014397 KEGG:K01187,NOG:NOG04112 Glucosidase	0	0	0	0	0	0	0	0	0	0	0	0	0	0	0	0	0	0	0	0	2.1	4.4	0	0
CLST014399 PFAM:PF00543.15,KEGG:K04751,COG:COG0347 Nitrogen regulatory protein PII	0	0	0	0	0	0	0	0	0	0	3.3	5.6	0	0	0	0	0	0	0	0	0	0	0	0
CLST014425 KEGG:K01755,TIGR:TIGR00838,COG:COG0165 Argininosuccinate lyase	0	0	0	0	0	0	0	0	0	0	2.2	0	0	0	0	0	0	0	0	0	0	0	0	0
CLST014463 NOG:NOG148246 Receptor	0	0	0	0	0	0	0	0	0	0	0	0	0	2.1	0	0	0	0	0	0	0	0	0	0
CLST014475 TIGR:TIGR01857,KEGG:K01952,COG:COG0047,COG:COG0046 Phosphoribosylformylglycinamidine (FGAM) synthase, synthetase domain	8.5	3.5	7.2	8.2	0	0	3	0	0	0	5.5	5.6	2	3.2	3.1	0	0	0	4.5	4.5	0	3.3	1.8	2.7
CLST014494 COG:COG0150,KEGG:K01933,TIGR:TIGR00878 Phosphoribosylaminoimidazole (AIR) synthetase	0	0	0	0	0.9	0	0	0	0	0	0	0	0	0	0	0	0	0	0	0	0	0	0	0
CLST014521 COG:COG1085,KEGG:K00965,PFAM:PF01087.15 Galactose-1-phosphate uridylyltransferase	2.1	0	0	0	0	0	0	0	0	0	2.2	3.3	0	0	0	0	0	0	0	0	0	0	0	0
CLST014522 PFAM:PF00498.19,KEGG:K07169,COG:COG1716 FOG: FHA domain	0	0	0	0	0	0	0	0	0	0	0	0	0	0	0	0	0	2.1	0	0	0	0	0	0
CLST014574 TIGR:TIGR00658,KEGG:K00611,TIGR:TIGR03316,COG:COG0078 Ornithine carbamoyltransferase	5.3	2.4	5.1	6.2	0	0	0	0	0	0	0	0	6	2.1	0	0	5.6	3.2	0	0	0	0	0	0
CLST014608 TIGR:TIGR00409,COG:COG0442,KEGG:K01881 Prolyl-tRNA synthetase	0	0	0	2.1	0	0	0	0	0	0	0	0	0	0	0	0	0	0	0	0	0	0	0	0
CLST014671 COG:COG1278,KEGG:K03704,PFAM:PF00313.15 Cold shock proteins	0	0	0	0	0	0	0	0	0	0	0	0	0	0	0	0	2.3	0	0	0	0	0	0	0
CLST014673 KEGG:K00262,PFAM:PF02812.11,COG:COG0334 Glutamate dehydrogenase/leucine dehydrogenase	0	1.2	0	0	0	0	0	0	0	0	0	0	0	0	0	0	0	0	0	0	0	0	0	0
CLST014702 COG:COG3537,PFAM:PF07971.5,TIGR:TIGR01180 Putative alpha-1,2-mannosidase	0	0	0	0	0	0	0	0	0	0	0	0	3	2.1	0	0	3.4	0	0	0	0	2.2	0	0
CLST014739 COG:COG1089,TIGR:TIGR01472,KEGG:K01711 GDP-D-mannose dehydratase	5.3	0	0	0	0	0	0	0	0	0	0	0	0	0	0	0	0	0	0	0	0	0	0	0
CLST014756 KEGG:K01523,COG:COG0140,TIGR:TIGR03188 Phosphoribosyl-ATP pyrophosphohydrolase	0	0	0	0	0	0	0	0	0	0	4.4	3.3	0	0	0	0	11.3	7.4	0	0	0	0	0	0
CLST014764 COG:COG1278,KEGG:K03704,PFAM:PF00313.15 Cold shock proteins	9.6	8.3	0	0	2.7	3.6	3	2	2.7	2.7	4.4	5.6	3	4.3	0	2	0	0	0	0	0	0	0	0
CLST014826 KEGG:K01187,NOG:NOG04112 Glucosidase	2.1	0	0	0	0	0	0	0	0	0	0	0	0	0	0	0	0	0	0	0	0	0	0	0
CLST014864 TIGR:TIGR00118,COG:COG0028,KEGG:K01652 Thiamine pyrophosphate-requiring enzymes [acetolactate synthase, pyruvate dehydrogenase (cytochrome), glyoxylate carboligase, phosphonopyruvate decarboxylase]	0	0	0	0	0	1.8	0	0	0	0	0	0	0	0	0	0	0	0	0	0	0	0	0	0
CLST014927 TIGR:TIGR00999,TIGR:TIGR01730,KEGG:K03585,COG:COG0845 Membrane-fusion protein	2.1	0	0	0	0	0	0	0	0	0	0	0	0	0	0	0	0	0	0	0	0	0	0	0
CLST014941 COG:COG1528 Ferritin-like protein	2.1	0	4.1	5.1	0	0	0	0	0	0	0	0	0	3.2	0	3	0	0	0	0	5.3	13.1	6.3	8
CLST014951 KEGG:K03502,COG:COG0389 Nucleotidyltransferase/DNA polymerase involved in DNA repair	0	0	1	0	0	0	0	0	0	0	0	0	0	0	0	0	0	0	0	0	0	0	0	0
CLST015000 hypothetical protein	0	0	0	0	0	0	0	0	2.7	0	0	0	0	0	0	0	0	0	0	0	0	0	0	0
CLST015012 KEGG:K02601,TIGR:TIGR00922,TIGR:TIGR01956,COG:COG0250 Transcription antiterminator	2.1	2.4	0	1	1.8	2.7	0	0	0	0	0	0	0	0	0	0	0	0	0	4.5	0	0	0	0
CLST015016 TIGR:TIGR01043,KEGG:K02117,COG:COG1155 Archaeal/vacuolar-type H+-ATPase subunit A	2.1	0	0	0	1.8	0	1	0	0	0	1.1	3.3	5	3.2	0	4.1	0	0	2.7	1.8	0	3.3	2.7	3.6
CLST015073 KEGG:K03531,TIGR:TIGR00065,NOG:NOG147877,COG:COG0206 Cell-Division protein	0	5.9	0	0	0	0	0	0	0	0	0	0	0	0	0	0	0	0	0	0	0	0	0	0
CLST015125 KEGG:K00226,COG:COG0167,TIGR:TIGR01037 Dihydroorotate dehydrogenase	0	0	0	0	0	0	0	0	0	0	0	0	0	0	0	0	0	0	5.4	3.6	0	0	0	0
CLST015150 TIGR:TIGR00398,PFAM:PF08264.6,TIGR:TIGR00422,COG:COG0525,KEGG:K01873,PFAM:PF10458.2 Valyl-tRNA synthetase	2.1	0	0	0	0	0	0	0	0	0	0	0	0	0	0	0	0	0	0	0	0	0	0	0
CLST015167 NOG:NOG87630 Dehydrogenase	0	2.4	0	0	0	0	0	0	0	0	0	0	0	0	0	0	0	0	0	0	0	2.2	0	0
CLST015247 NOG:NOG67917,PFAM:PF01030.17 Annotation not available	0	0	2	4.1	0	0	0	0	0	0	4.4	0	7	5.3	0	0	0	0	0	0	0	0	0	0
CLST015303 COG:COG0166,KEGG:K01810 Glucose-6-phosphate isomerase	3.2	0	1	0	0	0	0	0	0	0	0	0	0	3.2	7.2	7.1	0	0	3.6	1.8	0	1.1	0	0
CLST015356 KEGG:K00925,TIGR:TIGR00016,PFAM:PF00871.10,COG:COG0282 Acetate kinase	5.3	8.3	8.2	5.1	0.9	2.7	0	3	0	0	8.8	10	0	0	0	0	2.3	5.3	0	0	0	0	0	0
CLST015565 KEGG:K10254,PFAM:PF06100.4,COG:COG4716 Myosin-crossreactive antigen	0	0	0	0	0	0	0	0	0	0	0	0	0	0	0	0	0	0	0	0.9	0	0	0	0
CLST015600 TIGR:TIGR02630,KEGG:K01805,COG:COG2115 Xylose isomerase	0	0	0	2.1	9	7.3	3	2	0	0	0	3.3	0	0	0	0	0	0	0	0	0	0	2.7	4.4
CLST015630 COG:COG4206,KEGG:K02014 Outer membrane cobalamin receptor protein	0	0	0	0	0	0	0	0	0	0	0	0	0	2.1	0	0	0	0	0	0	0	0	0	0
CLST015649 KEGG:K01740,TIGR:TIGR01326,TIGR:TIGR02080,NOG:NOG119511,COG:COG2873 Protein involved in cysteine metabolism	3.2	0	2	1	4.5	3.6	0	0	0	0	0	2.2	0	0	0	0	0	0	3.6	3.6	0	0	0	0
CLST015699 PFAM:PF01658.10,COG:COG1260,KEGG:K01858 Myo-inositol-1-phosphate synthase	3.2	2.4	5.1	4.1	0	0	0	0	0	0	0	0	0	0	4.1	6.1	0	0	1.8	0	6.3	4.4	1.8	2.7
CLST015753 COG:COG3537,KEGG:K01238,COG:COG3507,PFAM:PF04616.7,PFAM:PF07971.5,NOG:NOG26186,TIGR:TIGR01180 Xylosidase	0	0	0	0	0	0	0	0	0	0	0	0	0	0	0	1	0	0	0	0	0	0	0	0
CLST015769 COG:COG0474,TIGR:TIGR01106,TIGR:TIGR01511,TIGR:TIGR01647,TIGR:TIGR01522,TIGR:TIGR01494,TIGR:TIGR01652,TIGR:TIGR01524,PFAM:PF00690.19,PFAM:PF00122.13,PFAM:PF00689.14,TIGR:TIGR01497,TIGR:TIGR01525,TIGR:TIGR01657,TIGR:TIGR01517,TIGR:TIGR01116,TIGR:TIGR01523,KEGG:K01529 Cation transport ATPase	0	0	0	0	0	0	0	0	0	0	2.2	4.5	0	0	0	0	0	0	0	0	0	0	0	0
CLST015817 NOG:NOG126471 Annotation not available	3.2	3.5	2	0	0	0	0	0	0	0	0	0	0	0	0	0	0	0	0	0	0	0	0	0
CLST015858 KEGG:K00324,TIGR:TIGR00518,COG:COG3288 NAD/NADP transhydrogenase alpha subunit	0	0	0	0	0	0	0	0	0	0	5.5	0	0	0	0	0	0	2.1	0	0	0	0	0	0
CLST015926 PFAM:PF03435.11,COG:COG1748,KEGG:K00290 Saccharopine dehydrogenase and related proteins	2.1	0	0	0	0	0	0	0	0	0	0	0	0	0	0	0	0	0	0	0	0	0	0	0
CLST016017 COG:COG0448,KEGG:K00975,TIGR:TIGR02091 ADP-glucose pyrophosphorylase	0	0	0	0	0	0	0	0	0	0	3.3	5.6	0	0	0	0	0	0	0	0	0	0	0	0
CLST016121 NOG:NOG39903 Annotation not available	0	0	0	0	0	0	0	0	0	0	0	0	0	2.1	0	0	0	0	0	0	0	0	0	0
CLST016849 hypothetical protein	0	0	0	0	0.9	0	0	0	0	0.9	0	0	0	0	0	0	0	0	0	0	0	0	0	0
CLST016895 TIGR:TIGR01184,KEGG:K01996,COG:COG0410,TIGR:TIGR03719,COG:COG0411,TIGR:TIGR02769,TIGR:TIGR03873,TIGR:TIGR01188,TIGR:TIGR00972,TIGR:TIGR03740,KEGG:K01995,TIGR:TIGR01288,TIGR:TIGR03258,TIGR:TIGR02315,TIGR:TIGR03410,TIGR:TIGR03265,TIGR:TIGR02982,TIGR:TIGR00968,PFAM:PF12399.1,TIGR:TIGR02868,TIGR:TIGR03411,TIGR:TIGR03796,TIGR:TIGR01846,TIGR:TIGR02314,TIGR:TIGR02857,TIGR:TIGR02211,TIGR:TIGR0…	0	0	0	0	0	0	0	0	0	0	0	2.2	0	0	0	0	0	0	0	0	0	0	0	0
CLST016959 KEGG:K01442,COG:COG3049,PFAM:PF02275.11 Penicillin V acylase and related amidases	0	0	3.1	2.1	0	0	0	0	0	0	0	0	0	0	0	0	4.5	4.2	0	0	0	0	0	0
CLST017277 hypothetical protein	0	0	0	0	0	0	0	0	0	0	0	0	1	2.1	0	0	0	0	0	0	0	0	0	0
CLST017368 PFAM:PF03577.8,KEGG:K08659,COG:COG4690 Dipeptidase	0	0	0	3.1	0	0	0	0	0	0	0	0	0	0	0	0	0	0	0	0	0	0	0	0
CLST017476 TIGR:TIGR01930,COG:COG0183,KEGG:K00626 Acetyl-CoA acetyltransferase	58.4	66.1	44.1	49.4	9	4.5	8.1	5.9	6.4	9.2	28.5	19	10	3.2	2.1	6.1	20.3	15.8	40.5	39.8	9.5	7.6	5.4	6.2
CLST017917 TIGR:TIGR00260,COG:COG0498,KEGG:K01733 Threonine synthase	0	0	2	0	0	0	0	0	0	0	0	0	0	0	0	0	0	0	0	0	0	0	0	0
CLST018045 PFAM:PF01212.14,COG:COG3033,TIGR:TIGR02617,KEGG:K01667 Tryptophanase	11.7	10.6	0	0	0	0	0	0	0	0	0	0	0	0	0	0	0	0	0	0	0	0	0	0
CLST018159 TIGR:TIGR00760,KEGG:K01786,COG:COG0235,KEGG:K03077 Ribulose-5-phosphate 4-epimerase and related epimerases and aldolases	2.1	0	2	0	0	0	0	0	0	0	0	4.5	0	0	0	0	0	0	0	0	0	0	0	0
CLST018322 PFAM:PF02610.8,COG:COG2160,PFAM:PF11762.1,KEGG:K01804 L-arabinose isomerase	4.2	3.5	3.1	4.1	7.2	7.3	5	0	0	0	4.4	4.5	2	6.4	0	0	4.5	2.1	10.8	14.5	3.2	6.5	3.6	3.6
CLST018448 hypothetical protein	0	0	0	0	0	0	0	0	0	0	0	0	0	0	0	0	0	0	0.9	1.8	0	0	0	0
CLST018450 TIGR:TIGR01179,KEGG:K01784,COG:COG1087,TIGR:TIGR01181 UDP-glucose 4-epimerase	0	2.4	0	2.1	0	0	0	0	0	0	0	0	0	0	0	0	0	0	0.9	0.9	0	0	0	0
CLST018574 PFAM:PF02610.8,COG:COG2160,PFAM:PF11762.1,KEGG:K01804 L-arabinose isomerase	0	0	0	0	1.8	0	0	0	0	0	0	0	0	0	0	0	0	0	0	0	0	0	0	1.8
CLST018678 hypothetical protein	0	0	0	0	0	0	0	0	0	0.9	0	0	0	0	0	0	0	0	0	0	0	0	0	0
CLST018745 COG:COG0238,KEGG:K02963,TIGR:TIGR00165 Ribosomal protein S18	0	0	0	0	0	0	0	0	1.8	1.8	0	0	3	0	0	2	0	0	4.5	1.8	0	0	0	0
CLST018911 PFAM:PF01268.12,COG:COG2759,KEGG:K01938 Formyltetrahydrofolate synthetase	29.7	28.3	21.5	19.6	17.9	18.1	7.1	4.9	4.6	8.2	36.2	33.5	16	26.7	9.3	4.1	4.5	5.3	27.9	32.6	5.3	7.6	16.1	16.9
CLST019035 TIGR:TIGR00253,PFAM:PF01985.14,COG:COG1534,KEGG:K07574 Predicted RNA-binding protein containing KH domain, possibly ribosomal protein	0	0	0	0	0	0	0	0	0	0	0	0	2	2.1	0	0	0	0	0	0	0	0	0	0
CLST019091 KEGG:K03832,NOG:NOG85285,PFAM:PF03544.7 Protein transporter	0	2.4	0	0	0	0	0	0	0	0	0	0	0	0	0	0	0	0	0	0	0	0	0	0
CLST019142 PFAM:PF01268.12,COG:COG2759,KEGG:K01938 Formyltetrahydrofolate synthetase	0	0	0	0	0	0	0	0	0	0	0	0	0	0	0	0	0	0	0	0	0	0	2.7	0
CLST019436 PFAM:PF09180.4,COG:COG0442,TIGR:TIGR00408,KEGG:K01881 Prolyl-tRNA synthetase	3.2	0	0	1	0	0	0	0	0	0	0	2.2	0	0	0	0	0	0	0	0	0	0	0	0
CLST019715 KEGG:K00174,COG:COG1014,TIGR:TIGR03710,COG:COG0674 Pyruvate:ferredoxin oxidoreductase and related 2-oxoacid:ferredoxin oxidoreductases, gamma subunit	2.1	0	0	0	0	0	0	0	0	0	0	0	0	0	0	0	0	0	0	0	0	0	0	0
CLST019815 COG:COG2152,NOG:NOG148967 Annotation not available	0	0	0	0	0	0	0	0	0	0	0	0	0	0	0	0	0	0	2.7	0	0	0	0	0
CLST019862 KEGG:K03340,TIGR:TIGR01921,NOG:NOG27533 Dehydrogenase	0	0	0	0	0	0	0	0	0	0	0	0	0	0	0	0	0	0	0	0	0	1.1	0	0
CLST019919 COG:COG0153,TIGR:TIGR00131,TIGR:TIGR00549,PFAM:PF10509.2,PFAM:PF00288.19,KEGG:K00849 Galactokinase	0	0	0	0	0	0	0	0	0	0	0	0	0	0	0	0	2.3	2.1	0	0	0	0	0	0
CLST020069 hypothetical protein	0	0	0	0	0	0	0	0	0	0	0	0	0	0	0	0	0	0	0	0.9	0	0	0	0
CLST020136 COG:COG0052,TIGR:TIGR01011,KEGG:K02967 Ribosomal protein S2	4.2	11.8	5.1	10.3	0.9	0.9	8.1	4.9	0	1.8	2.2	1.1	0	0	0	2	0	0	15.3	11.8	0	0	16.1	13.3
CLST020368 PFAM:PF01431.14,KEGG:K07386,PFAM:PF05649.6,COG:COG3590 Predicted metalloendopeptidase	4.2	3.5	0	0	0	0	0	0	0	0	0	0	0	0	0	0	0	0	0	0	0	0	0	0
CLST020424 KEGG:K03609,COG:COG2894,TIGR:TIGR01968 Septum formation inhibitor-activating ATPase	3.2	0	2	2.1	0	0	0	0	0	0	0	0	0	0	0	0	0	0	0	0	0	0	0	0
CLST020489 COG:COG1145,KEGG:K00335,COG:COG1894,TIGR:TIGR01959,PFAM:PF00037.20 NADH:ubiquinone oxidoreductase, NADH-binding (51 kD) subunit	0	0	0	0	0	0	0	0	0	0	0	0	0	0	0	0	0	0	0	0	0	0	2.7	4.4
CLST020512 COG:COG0451,KEGG:K01784 Nucleoside-diphosphate-sugar epimerases	0	0	2	0	0	0	0	0	0	0	0	0	0	0	0	0	0	0	1.8	3.6	0	0	0	2.7
CLST020880 KEGG:K04027,PFAM:PF00936.12,COG:COG4577 Carbon dioxide concentrating mechanism/carboxysome shell protein	28.7	41.3	14.3	13.4	52.9	26.3	21.2	20.8	52.9	55.9	31.8	45.7	21	25.6	24.7	34.5	12.4	6.3	67.5	45.3	36	33.7	18.8	23.1
CLST020885 KEGG:K12574,TIGR:TIGR00649,COG:COG0595 Predicted hydrolase of the metallo-beta-lactamase superfamily	0	0	0	0	0	0	0	0	0	0	0	0	0	0	0	0	0	0	0	0	0	1.1	0	0
CLST020979 hypothetical protein	0	0	0	0	0	0	1	0	0	0	0	0	0	0	0	0	0	0	0	0	0	0	0	0
CLST021076 hypothetical protein	0	0	0	0	0	0	0	0	0	0	0	0	0	0	0	0	1.1	0	0	0	0	0	0	0
CLST021087 KEGG:K02939,PFAM:PF01281.12,COG:COG0359 Ribosomal protein L9	6.4	5.9	4.1	5.1	6.3	10	3	2	2.7	2.7	35.1	15.6	0	0	0	0	12.4	11.6	0	0	0	0	1.8	0
CLST021088 KEGG:K01209,COG:COG3534 Alpha-L-arabinofuranosidase	0	0	0	0	0	0	0	0	0	0	0	0	0	4.3	0	0	0	0	0	0	0	0	0	0
CLST021092 COG:COG4206 Outer membrane cobalamin receptor protein	0	0	0	0	0	0	0	0	0	0	0	0	0	0	0	0	0	0	0	0	0	2.2	0	0
CLST021138 PFAM:PF01855.12,KEGG:K00174,TIGR:TIGR03710,COG:COG0674 Pyruvate:ferredoxin oxidoreductase and related 2-oxoacid:ferredoxin oxidoreductases, alpha subunit	0	0	0	3.1	0	0	0	0	0	0	0	0	0	0	0	0	0	0	0	0	0	0	0	0
CLST021202 KEGG:K03530,PFAM:PF00216.14,COG:COG0776 Bacterial nucleoid DNA-binding protein	0	0	0	0	0	0	0	0	0	0	0	0	0	0	0	0	0	0	0	1.8	0	0	0	0
CLST021265 KEGG:K00174,COG:COG1014,TIGR:TIGR03710,COG:COG0674 Pyruvate:ferredoxin oxidoreductase and related 2-oxoacid:ferredoxin oxidoreductases, alpha subunit	13.8	11.8	3.1	12.4	0	0	0	0	0	0	0	0	0	0	15.5	13.2	0	0	3.6	4.5	2.1	6.5	2.7	0
CLST021369 NOG:NOG47341,PFAM:PF11240.1 Annotation not available	0	0	0	0	0	0	0	0	0	0	0	0	0	0	0	0	0	0	0	0	19	19.6	0	0
CLST021411 COG:COG0185,TIGR:TIGR01050,KEGG:K02965 Ribosomal protein S19	1.1	1.2	0	0	0	0	0	0	0	0	0	0	0	0	0	0	0	0	4.5	16.3	0	0	0	6.2
CLST021433 COG:COG2407 L-fucose isomerase and related proteins	5.3	3.5	1	2.1	0	0	2	2	16.4	14.7	7.7	3.3	3	3.2	5.2	0	0	0	9	10.9	2.1	0	6.3	5.3
CLST021442 COG:COG0035,TIGR:TIGR01091,KEGG:K00761 Uracil phosphoribosyltransferase	0	0	0	0	0	0	2	0	0	0	0	0	0	0	0	0	0	0	0	0	0	0	0	0
CLST021456 TIGR:TIGR03466,KEGG:K01710,TIGR:TIGR01181,COG:COG1088 dTDP-D-glucose 4,6-dehydratase	2.1	0	0	0	0	0	0	0	0	0	0	0	0	0	0	0	0	0	0	0	0	0	0	0
CLST021479 KEGG:K01190,KEGG:K01238,COG:COG3250 Beta-galactosidase/beta-glucuronidase	0	0	0	0	0	0	0	0	0	0	0	0	0	0	0	0	0	0	0	0	0	3.3	0	0
CLST021935 hypothetical protein	0	0	0	0	0	0	0	0	1.8	0	0	0	0	0	0	0	0	0	0	0	0	0	0	0
CLST022087 TIGR:TIGR01043,KEGG:K02117,COG:COG1155 Archaeal/vacuolar-type H+-ATPase subunit A	0	0	0	0	0	0	0	0	0	0	0	0	0	0	2.1	0	0	0	0	0	0	0	0	0
CLST022220 COG:COG0035,TIGR:TIGR01091,KEGG:K00761 Uracil phosphoribosyltransferase	0	0	0	0	0	0	0	0	0	0	0	0	0	0	0	0	0	0	0	0.9	0	0	0.9	0.9
CLST022368 KEGG:K00048,TIGR:TIGR02638,COG:COG1454 Alcohol dehydrogenase, class IV	0	0	2	3.1	2.7	0	2	0	0	0	4.4	2.2	0	0	0	0	4.5	0	0	0	0	0	0	1.8
CLST022605 COG:COG2885 Outer membrane protein and related peptidoglycan-associated (lipo)proteins	6.4	4.7	0	0	0	0	0	0	0	0	0	0	3	3.2	0	0	0	0	0	0	0	0	0	0
CLST022663 hypothetical protein	0	0	0	0	0	0.9	0	0	0	0	0	0	0	0	0	0	0	0	0	0	0	0	0	0
CLST022710 COG:COG0562,TIGR:TIGR00031,KEGG:K01854 UDP-galactopyranose mutase	0	0	0	2.1	0	0	0	0	0	0	0	0	0	0	0	0	0	0	0	0	0	0	0	0
CLST022715 KEGG:K01844,NOG:NOG10403,PFAM:PF09043.4 Aminomutase	0	0	0	0	0	0	0	0	0	0	0	0	0	0	0	0	0	0	0	0	0	0	3.6	0
CLST022770 PFAM:PF00441.17,COG:COG1960,KEGG:K00257,KEGG:K00022,TIGR:TIGR03207,PFAM:PF02771.9,PFAM:PF02770.12,KEGG:K00248 Acyl-CoA dehydrogenases	42.5	47.2	68.6	65.9	5.4	7.3	6	5.9	5.5	7.3	8.8	12.3	18	18.2	5.2	9.1	41.7	49.6	45	42.6	10.6	12	24.2	17.8
CLST022892 KEGG:K02906,TIGR:TIGR03626,COG:COG0087,TIGR:TIGR03625 Ribosomal protein L3	7.4	5.9	10.2	8.2	1.8	0.9	0	0	0	0	0	2.2	0	1.1	4.1	1	0	0	1.8	6.3	2.1	3.3	1.8	1.8
CLST022899 KEGG:K01442,COG:COG3049,PFAM:PF02275.11 Penicillin V acylase and related amidases	0	4.7	0	0	0	0	0	0	0	0	0	0	0	0	0	0	0	0	0	0	0	0	0	0
CLST022914 KEGG:K01876,TIGR:TIGR00459,COG:COG0173 Aspartyl-tRNA synthetase	0	0	0	1	0	0	0	0	0	0	0	0	0	0	0	0	0	0	0	0	0	0	0	0
CLST023055 hypothetical protein	0	0	0	0	0	0	0	0	0	0	0	0	0	0	0	0	0	0	2.7	0	0	0	0	0
CLST023060 KEGG:K01372,COG:COG3579,PFAM:PF03051.8,NOG:NOG83153 Cysteine-Type endopeptidase	2.1	0	2	2.1	0	0	0	0	0	0	0	0	0	0	0	0	0	0	0	0	11.6	12	0	0
CLST023147 KEGG:K10254,PFAM:PF06100.4,COG:COG4716 Myosin-crossreactive antigen	5.3	0	0	2.1	0	0	0	0	0	0	0	0	0	5.3	0	0	0	0	0	3.6	0	0	0	0
CLST023209 PFAM:PF00441.17,COG:COG1960,PFAM:PF02770.12,KEGG:K00248 Acyl-CoA dehydrogenases	0	0	0	0	2.7	0	0	0	0	1.8	0	0	0	0	0	0	0	0	0	0	0	0	1.8	0
CLST023233 COG:COG2755 Lysophospholipase L1 and related esterases	0	0	0	0	0	0	0	0	0	0	0	0	0	2.1	0	0	0	0	0	0	0	0	0	0
CLST023253 TIGR:TIGR02618,COG:COG3033,TIGR:TIGR02617,KEGG:K01667 Tryptophanase	6.4	5.9	0	0	0	0	0	0	0	0	0	0	0	2.1	0	0	0	0	1.8	1.8	0	0	0	0
CLST023352 TIGR:TIGR01117,COG:COG4799,KEGG:K01966 Acetyl-CoA carboxylase, carboxyltransferase component (subunits alpha and beta)	0	0	0	0	0	0	0	0	0	0	0	0	0	0	0	1	0	0	0	0	0	0	0	0
CLST023410 KEGG:K01815,COG:COG3717 5-keto 4-deoxyuronate isomerase	0	0	0	0	0	0	0	0	0	0	0	0	0	2.1	0	0	0	0	0	0	0	0	0	0
CLST023420 PFAM:PF00930.14,COG:COG0793,TIGR:TIGR02800,PFAM:PF07676.5,KEGG:K08676 Periplasmic protease	0	0	3.1	2.1	0	0	0	0	0	0	0	0	0	0	0	0	0	0	0	0	10.6	13.1	0	0
CLST023526 TIGR:TIGR03787,PFAM:PF00486.21,TIGR:TIGR02154,COG:COG0745,PFAM:PF00072.17,TIGR:TIGR01387 Response regulators consisting of a CheY-like receiver domain and a winged-helix DNA-binding domain	5.3	0	3.1	0	0	0	0	0	0	0	0	0	0	0	0	0	0	0	0	0	0	0	0	0
CLST023556 COG:COG0668,KEGG:K03442 Small-conductance mechanosensitive channel	0	0	0	0	0	0	0	0	0	0	0	0	0	2.1	0	0	0	0	0	0	0	0	0	0
CLST023785 PFAM:PF07719.10,NOG:NOG13016,COG:COG4859,NOG:NOG12981,PFAM:PF09951.2,NOG:NOG45907,COG:COG0666 Annotation not available	0	0	3.1	2.1	0	0	0	0	0	0	0	0	0	0	0	0	0	0	0	0	0	0	0	0
CLST023835 COG:COG0352,COG:COG0422,TIGR:TIGR00693,TIGR:TIGR00190,KEGG:K03147 Thiamine biosynthesis protein ThiC	0	0	0	0	0	0	0	0	0	0	0	0	0	0	0	0	2.3	2.1	0	0	0	0	0	0
CLST024098 KEGG:K03612,TIGR:TIGR01947,COG:COG4659 Predicted NADH:ubiquinone oxidoreductase, subunit RnfG	2.1	0	0	0	0	0	0	0	0	0	0	0	0	0	0	0	0	0	0	0	0	0	0	0
CLST024502 NOG:NOG69038,NOG:NOG137846 Receptor	0	0	0	0	0	0	0	0	0	0	0	0	0	1.1	0	0	0	0	0	0	0	0	0	0
CLST024521 KEGG:K01190,PFAM:PF00703.14,PFAM:PF02837.11,COG:COG3250,PFAM:PF02836.10 Beta-galactosidase/beta-glucuronidase	0	0	0	0	0	0	0	0	0	0	0	0	1	0	0	0	0	0	0	0	0	0	0	0
CLST024523 KEGG:K01077,PFAM:PF00245.13,COG:COG1785 Alkaline phosphatase	1.1	0	2	1	0	0	0	0	0	0	0	0	0	5.3	0	0	0	0	0	0	0	0	0	0
CLST024620 PFAM:PF00162.12,COG:COG0126,KEGG:K00927 3-phosphoglycerate kinase	0	0	3.1	0	0	0	0	0	0	0	0	0	0	1.1	0	0	0	0	1.8	0.9	0	0	0	0
CLST024623 NOG:NOG121776,TIGR:TIGR02037,COG:COG0265,KEGG:K01362 Serine protease	3.2	0	0	0	0	0	0	0	0	0	0	0	0	0	0	0	0	0	0	0	0	0	0	0
CLST024664 PFAM:PF01268.12,COG:COG2759,KEGG:K01938 Formyltetrahydrofolate synthetase	2.1	0	1	0	0	0	0	0	0	0	0	0	0	0	1	0	0	0	0	0	0	0	0	0
CLST024702 COG:COG1825,KEGG:K02897 Ribosomal protein L25 (general stress protein Ctc)	2.1	0	4.1	2.1	0	1.8	0	4	0	0	19.7	27.9	0	0	0	0	3.4	0	0	0	0	0	0	0
CLST024713 COG:COG1538,PFAM:PF02321.11,KEGG:K03287 Outer membrane protein	0	0	0	0	0	0	0	0	0	0	0	0	2	0	0	0	0	0	0	0	0	0	0	0
CLST024757 KEGG:K00789,PFAM:PF02773.9,COG:COG0192,TIGR:TIGR01034 S-adenosylmethionine synthetase	0	0	0	0	0	0	0	0	0	1.8	0	0	0	0	0	0	0	0	0	0	0	0	0	0
CLST024803 COG:COG0166,KEGG:K01810 Glucose-6-phosphate isomerase	0	0	0	0	0	0	0	0	0	0	0	0	0	0	0	0	0	0	0	0	0	0	0	1.8
CLST025101 hypothetical protein	0	0	0	0	0	0	0	0	0	0	0	0	0	0	0	0	0	0	0	0	0	0	0.9	0
CLST025157 COG:COG2086,PFAM:PF01012.14,KEGG:K03521 Electron transfer flavoprotein, beta subunit	34	44.8	45.1	30.9	4.5	1.8	0	0	1.8	3.7	4.4	5.6	6	8.5	13.4	9.1	19.1	27.4	40.5	45.3	5.3	5.4	22.4	24
CLST025246 KEGG:K01239,COG:COG1957,PFAM:PF01156.12 Inosine-uridine nucleoside N-ribohydrolase	0	0	0	0	3.6	0	0	0	0	0	0	0	0	0	0	0	0	0	0	0	0	0	0	0
CLST025261 COG:COG0180,TIGR:TIGR00233,KEGG:K01867 Tryptophanyl-tRNA synthetase	0	0	0	0	0	0	0	0	0	0	0	0	0	0	0	0	0	0	0	1.8	0	0	0	0
CLST025396 COG:COG3968,PFAM:PF12437.1,KEGG:K01915 Uncharacterized protein related to glutamine synthetase	0	0	0	0	0	0	0	0	0	1.8	0	0	0	0	0	0	0	0	0	0	0	0	0	0
CLST025520 COG:COG0673 Predicted dehydrogenases and related proteins	10.6	0	0	0	0	0	0	0	0	0	0	0	0	0	0	0	0	0	0	0	0	0	0	0
CLST025557 COG:COG1109,KEGG:K03431,TIGR:TIGR01455 Phosphomannomutase	0	0	0	2.1	0	0	0	0	0	0	0	0	0	0	0	0	0	0	0	0.9	0	0	0	0
CLST025643 NOG:NOG122670 Annotation not available	6.4	5.9	2	9.3	0	0	0	0	0	0	0	0	0	3.2	0	0	5.6	9.5	3.6	4.5	6.3	4.4	0	0
CLST025663 KEGG:K02112,PFAM:PF02874.16,COG:COG0055,TIGR:TIGR01039 F0F1-type ATP synthase, beta subunit	9.6	13	12.3	7.2	0	0	0	0	0	0	5.5	8.9	2	3.2	10.3	9.1	9	6.3	4.5	4.5	0	0	0	0.9
CLST025690 PFAM:PF06439.4,NOG:NOG42312 Annotation not available	12.7	11.8	0	2.1	0	0	0	0	0	0	0	0	0	0	0	0	0	0	0	0	0	0	0	0
CLST025758 COG:COG1185,KEGG:K00962,TIGR:TIGR03591 Polyribonucleotide nucleotidyltransferase (polynucleotide phosphorylase)	0	0	0	0	0	0	0	0	10	5.5	0	0	0	0	0	1	0	0	0	0	0	1.1	0	1.8
CLST025972 KEGG:K04487,COG:COG1104,TIGR:TIGR03402 Cysteine sulfinate desulfinase/cysteine desulfurase and related enzymes	0	0	0	1	0	0	0	0	0	0	0	0	0	0	0	0	0	0	0	0	0	0	0	0
CLST026011 COG:COG0056,TIGR:TIGR00962,KEGG:K02111 F0F1-type ATP synthase, alpha subunit	0	0	0	0	0	0	0	0	2.7	0.9	0	0	0	0	0	0	0	0	0	0	0	0	0	0
CLST026289 hypothetical protein	0	0	0	0	0	0	0	0	0	0	0	0	0	0	0	0	1.1	0	0	0	0	0	0	0
CLST026475 hypothetical protein	0	0	0	0	0	0	0	0	0	0	0	0	1	0	0	0	0	0	0	0	0	0	0	0
CLST026801 KEGG:K01868,TIGR:TIGR00418,COG:COG0441 Threonyl-tRNA synthetase	0	0	0	0	0	0	0	0	1.8	0	0	0	0	0	0	0	0	0	0	0	0	0	0	0
CLST026967 PFAM:PF08501.4,KEGG:K00014,TIGR:TIGR01809,COG:COG0169,TIGR:TIGR00507 Shikimate 5-dehydrogenase	0	0	0	4.1	0	0	0	0	0	0	0	0	0	0	0	0	0	0	0	0	0	0	0	0
CLST026979 TIGR:TIGR00217,PFAM:PF02446.10,PFAM:PF00686.12,COG:COG1640,KEGG:K00705 4-alpha-glucanotransferase	2.1	3.5	0	0	0	0	0	0	0	0	0	0	0	0	0	0	0	0	0	0	0	0	0	0
CLST027116 KEGG:K01338,TIGR:TIGR00763 lon: ATP-dependent protease La	0	0	0	0	0	0	0	0	0	0	0	0	0	0	0	0	0	0	0	1.8	0	0	0	0
CLST027266 TIGR:TIGR01822,COG:COG0156,TIGR:TIGR01821,KEGG:K00639 7-keto-8-aminopelargonate synthetase and related enzymes	1.1	2.4	0	0	0	0	0	0	0	0	0	0	0	0	0	0	0	0	0	0	0	0	0	0
CLST027372 KEGG:K01785,TIGR:TIGR02636,COG:COG2017 Galactose mutarotase and related enzymes	0	0	0	0	0	0	0	0	0	0	0	0	3	5.3	0	0	0	0	0	0	0	0	0	0
CLST027427 COG:COG1109,PFAM:PF02878.9,KEGG:K01840,PFAM:PF02879.9,KEGG:K01835 Phosphomannomutase	10.6	7.1	6.1	9.3	1.8	0.9	3	5.9	0	0	7.7	5.6	0	2.1	0	1	0	0	2.7	5.4	0	0	4.5	3.6
CLST027688 COG:COG1695 Predicted transcriptional regulators	0	0	6.1	3.1	0	0	0	0	0	0	0	0	0	0	0	0	0	0	0	0	0	0	0	0
CLST027696 TIGR:TIGR01312,KEGG:K00854,COG:COG1070,TIGR:TIGR01311 Sugar (pentulose and hexulose) kinases	0	0	1	0	0	0	0	0	0	0	2.2	2.2	0	0	0	0	0	0	0	0	0	0	0	0
CLST027736 COG:COG0056,TIGR:TIGR00962,KEGG:K02111 F0F1-type ATP synthase, alpha subunit	8.5	9.4	5.1	7.2	0	0	0	0	1.8	3.7	5.5	8.9	2	3.2	4.1	0	4.5	11.6	1.8	3.6	0	0	0	0
CLST027973 COG:COG0205,TIGR:TIGR02478,TIGR:TIGR02482,KEGG:K00850 6-phosphofructokinase	0	0	0	0	0	0	0	0	0	0	0	0	0	0	2.1	0	0	0	0	0	0	0	0	0.9
CLST028047 COG:COG3716,TIGR:TIGR00828,KEGG:K02796 Phosphotransferase system, mannose/fructose/N-acetylgalactosamine-specific component IID	0	0	0	0	0	0	0	2	0	0	0	0	0	0	0	0	0	0	0	0	0	0	0	0
CLST028224 TIGR:TIGR03320,COG:COG0624,TIGR:TIGR03526 Acetylornithine deacetylase/Succinyl-diaminopimelate desuccinylase and related deacylases	4.2	2.4	0	0	0.9	0	0	0	2.7	1.8	0	0	5	0	5.2	7.1	0	0	1.8	3.6	0	0	0	0
CLST028297 PFAM:PF01268.12,COG:COG2759,KEGG:K01938 Formyltetrahydrofolate synthetase	0	0	0	0	3.6	2.7	0	0	0	0	0	0	2	4.3	0	0	0	0	0	0	0	0	0	0
CLST028411 PFAM:PF08240.5,TIGR:TIGR02818,COG:COG1063,TIGR:TIGR03201,TIGR:TIGR02824,KEGG:K00008,TIGR:TIGR00692 Threonine dehydrogenase and related Zn-dependent dehydrogenases	0	0	0	0	0	0	0	0	0	0	0	2.2	0	0	0	0	0	0	0	0	0	0	0	0
CLST028489 TIGR:TIGR02279,PFAM:PF00725.15,COG:COG1250,KEGG:K00074,TIGR:TIGR02441,PFAM:PF02737.11 3-hydroxyacyl-CoA dehydrogenase	62.6	85	62.5	61.8	4.5	7.3	15.1	4	6.4	5.5	17.5	20.1	17	10.7	10.3	8.1	16.9	13.7	45	39.8	0	0	25.1	19.6
CLST028707 hypothetical protein	0	0	0	0	0	0	0	0	0	0.9	0	0	0	0	0	0	0	0	0	0	0	0	0	0
CLST028947 COG:COG2871,TIGR:TIGR01941,KEGG:K00351 Na+-transporting NADH:ubiquinone oxidoreductase, subunit NqrF	0	0	0	0	0	0	0	0	0	0	0	0	0	1.1	0	0	0	0	0	0	0	0	0	0
CLST028986 KEGG:K02109,COG:COG0711 F0F1-type ATP synthase, subunit b	0	3.5	0	0	0	1.8	0	0	0	0	0	0	0	0	0	0	0	0	0	0	0	0	0	0
CLST029054 KEGG:K05882,TIGR:TIGR01293,KEGG:K00100,COG:COG0667 Predicted oxidoreductases (related to aryl-alcohol dehydrogenases)	0	0	0	0	0	0	0	0	0	0	0	4.5	0	0	0	0	0	0	0	0	0	0	0	0
CLST029099 COG:COG3968,PFAM:PF12437.1,KEGG:K01915 Uncharacterized protein related to glutamine synthetase	5.3	5.9	6.1	11.3	0	0	0	0	0	0	0	0	0	0	0	0	2.3	2.1	0.9	1.8	0	0	0	0
CLST029139 KEGG:K01740,TIGR:TIGR01326,TIGR:TIGR01324,TIGR:TIGR02080,COG:COG2873 O-acetylhomoserine sulfhydrylase	0	0	7.2	7.2	0	0	0	0	0	0	0	0	0	0	0	0	2.3	0	1.8	0	0	0	1.8	1.8
CLST029181 hypothetical protein	0	0	0	0	0	0.9	0	0	0	0	0	0	0	0	0	0	0	0	0	0	0	0	0	0
CLST029279 TIGR:TIGR03346,COG:COG0542,KEGG:K03695 ATPases with chaperone activity, ATP-binding subunit	0	0	0	0	0	0	0	0	0	0	0	0	0	0	0	0	0	0	0	0	0	0	0.9	0.9
CLST029397 COG:COG0330 Membrane protease subunits, stomatin/prohibitin homologs	0	0	0	0	0	0	0	0	0	0	0	0	0	0	0	0	0	0	1.8	1.8	0	0	0	0
CLST029460 COG:COG0448,KEGG:K00975,TIGR:TIGR02091,TIGR:TIGR02092 ADP-glucose pyrophosphorylase	0	0	0	0	0	0	0	0	0	0	0	0	0	0	1	1	2.3	0	0	1.8	0	2.2	0	0
CLST029737 COG:COG2304,KEGG:K07114,PFAM:PF12450.1,PFAM:PF12034.1 Uncharacterized protein containing a von Willebrand factor type A (vWA) domain	1.1	0	0	0	0	0	0	0	0	0	0	0	0	0	0	0	0	0	0	0	0	0	0	0
CLST029739 KEGG:K01278,COG:COG1506 Dipeptidyl aminopeptidases/acylaminoacyl-peptidases	0	0	0	0	0	0	0	0	0	0	0	0	0	2.1	0	0	0	0	0	0	4.2	6.5	0	0
CLST029829 COG:COG1653 ABC-type sugar transport system, periplasmic component	19.1	18.9	3.1	5.1	7.2	4.5	0	0	0	0	8.8	8.9	0	0	0	0	6.8	5.3	0	0	0	0	0	0
CLST029898 COG:COG1847,PFAM:PF01424.15,KEGG:K06346 Predicted RNA-binding protein	0	0	0	0	0	0	0	0	0	0	0	0	0	4.3	0	0	0	0	0	0	0	0	0	0
CLST030007 COG:COG1350,TIGR:TIGR01415,KEGG:K06001 Predicted alternative tryptophan synthase beta-subunit (paralog of TrpB)	0	0	0	0	0	0	0	0	0	0	0	0	0	0	0	0	0	0	2.7	0	0	0	0	0
CLST030087 PFAM:PF00464.12,KEGG:K00600,COG:COG0112 Glycine/serine hydroxymethyltransferase	3.2	2.4	0	0	0	0	0	0	0	0	0	2.2	0	0	1	0	0	0	4.5	1.8	0	0	0	0
CLST030194 TIGR:TIGR01951,COG:COG0781,KEGG:K03625 Transcription termination factor	0	0	0	0	0	0	0	0	0	0	2.2	0	0	0	0	0	0	0	0	0	0	0	0	0
CLST030322 PFAM:PF00112.16,KEGG:K01372,PFAM:PF03051.8,NOG:NOG83153 Cysteine-Type endopeptidase	0	0	2	2.1	0	0	0	0	0	0	0	0	0	0	0	0	0	0	0	0	0	0	0	0
CLST030342 PFAM:PF00183.11,COG:COG0326,KEGG:K04079 Molecular chaperone, HSP90 family	5.3	2.4	0	0	1.8	0	3	0	0	0	2.2	2.2	5	6.4	0	0	0	0	0	0	0	0	0	0
CLST030446 TIGR:TIGR01933,COG:COG0330 Membrane protease subunits, stomatin/prohibitin homologs	0	0	0	0	0	0	0	0	0	1.8	0	0	0	0	0	0	0	0	0	0	0	0	0	0
CLST030466 KEGG:K09903,TIGR:TIGR02075,COG:COG0528 Uridylate kinase	0	0	2	2.1	0	0	0	0	0	0	0	0	0	0	0	0	2.3	0	0	0	0	0	0	0
CLST030534 COG:COG0065,TIGR:TIGR02083,KEGG:K01703 3-isopropylmalate dehydratase large subunit	0	0	0	1	0	0	0	0	0	0	0	0	0	0	0	0	0	0	0	0	0	0	0	0
CLST030711 KEGG:K00615,COG:COG0021,TIGR:TIGR00232 Transketolase	11.7	5.9	8.2	2.1	5.4	3.6	7.1	0	0	0	16.4	8.9	0	0	0	0	9	5.3	0	0	0	0	7.2	6.2
CLST030740 KEGG:K01923,TIGR:TIGR00081,COG:COG0152 Phosphoribosylaminoimidazolesuccinocarboxamide (SAICAR) synthase	0	0	0	0	0	0	0	0	0	0	0	0	0	0	0	0	3.4	0	0	0	0	0	0	0
CLST031060 COG:COG0629,TIGR:TIGR00621,KEGG:K03111,PFAM:PF00436.18 Single-stranded DNA-binding protein	0	0	0	0	0	0	0	0	0	0	0	0	2	0	0	0	0	0	0	0	0	0	0	1.8
CLST031180 TIGR:TIGR01079,COG:COG0198,KEGG:K02895 Ribosomal protein L24	0	3.5	0	0	0	0	0	0	0	2.7	0	0	0	0	2.1	3	3.4	0	0	0	0	3.3	0	0
CLST031192 TIGR:TIGR02176,KEGG:K03737,COG:COG0674,COG:COG1013 Pyruvate:ferredoxin oxidoreductase and related 2-oxoacid:ferredoxin oxidoreductases, beta subunit	0	0	0	0	0	0	0	0	0	0	0	0	0	0	0	1	0	0	0	0	0	0	0.9	0.9
CLST031240 KEGG:K01803,NOG:NOG43639,PFAM:PF00121.11 Annotation not available	0	0	0	0	0	0	0	0	0	0	0	0	0	0	0	0	0	0	0	0	0	0	0.9	0.9
CLST031289 COG:COG2373,KEGG:K06894 Large extracellular alpha-helical protein	0	0	0	0	0	0	0	0	0	0	0	0	2	1.1	0	0	0	0	0	0	0	0	0	0
CLST031440 COG:COG0244,KEGG:K02864,PFAM:PF00466.13 Ribosomal protein L10	0	1.2	0	0	0	0	0	0	10	6.4	0	4.5	3	4.3	12.4	0	0	0	0	0	0	0	3.6	6.2
CLST031594 KEGG:K03545,TIGR:TIGR00115,COG:COG0544 FKBP-type peptidyl-prolyl cis-trans isomerase (trigger factor)	9.6	5.9	3.1	4.1	6.3	8.2	4	0	0	0	8.8	13.4	0	0	0	0	4.5	2.1	0	0	0	0	0	0
CLST031775 COG:COG0031,TIGR:TIGR01137,TIGR:TIGR01139,KEGG:K01738,TIGR:TIGR01136 Cysteine synthase	2.1	2.4	0	0	0	0	3	0	0	0	0	0	0	0	0	0	0	0	0	0	0	0	0	0
CLST032084 PFAM:PF03764.11,PFAM:PF00679.17,TIGR:TIGR00484,KEGG:K02355,COG:COG0480,TIGR:TIGR00490 Translation elongation factors (GTPases)	3.2	0	4.1	3.1	0	0.9	1	0	0.9	0.9	1.1	4.5	2	3.2	2.1	5.1	1.1	2.1	0	0	0	1.1	1.8	1.8
CLST032101 NOG:NOG87595 Receptor	0	0	0	0	0	0	0	0	0	0	0	0	0	0	1	0	0	0	0	0	0	0	0	0
CLST032195 COG:COG0589,PFAM:PF00582.19 Universal stress protein UspA and related nucleotide-binding proteins	0	3.5	0	0	0	0	3	0	0	0	3.3	6.7	0	0	0	0	4.5	0	0	0	0	0	0	0
CLST032212 KEGG:K00688,PFAM:PF11897.1,TIGR:TIGR02094,COG:COG0058 Glucan phosphorylase	0	0	0	0	0	0	0	0	6.4	6.4	0	0	0	0	0	0	0	0	0	0	0	0	0	0
CLST032374 KEGG:K00088,PFAM:PF00571.21,COG:COG0516 IMP dehydrogenase/GMP reductase	0	0	0	0	0	0	0	0	0.9	0	0	0	0	0	0	0	0	0	0	0	0	0	0	0
CLST032484 NOG:NOG39405 Lipoprotein	0	0	0	0	0	0	0	0	0	0	0	0	0	2.1	0	0	0	0	0	0	0	0	0	0
CLST032492 PFAM:PF10633.2,COG:COG1470 Predicted membrane protein	0	0	0	0	0	0	0	0	0	0	0	0	4	7.5	0	0	0	0	0	0	0	0	0	0
CLST032567 TIGR:TIGR00978,COG:COG0136,KEGG:K00133 Aspartate-semialdehyde dehydrogenase	0	0	4.1	0	0	0	0	0	0	0	0	0	0	0	0	0	0	0	0	0	0	0	0	0
CLST032599 KEGG:K01815,COG:COG3717 5-keto 4-deoxyuronate isomerase	0	0	0	3.1	0	0	0	0	0	0	0	0	0	0	0	3	0	0	0	0	0	5.4	0	0
CLST032613 COG:COG0642 Signal transduction histidine kinase	0	0	0	0	0	0.9	0	0	0	0	0	0	0	0	0	0	0	0	0	0	0	0	0	0
CLST032638 COG:COG1538,PFAM:PF02321.11 Outer membrane protein	0	0	0	0	0	0	0	0	0	0	0	0	0	0	0	2	0	0	0	0	0	2.2	0	0
CLST032721 hypothetical protein	0	0	0	0	0	0	0	0	0	0	0	0	0	0	0	0	0	0	0	0	0	0	1.8	0
CLST032984 PFAM:PF07719.10,TIGR:TIGR02521,NOG:NOG41185 Annotation not available	53.1	69.6	42	35	0	0	0	0	0	0	0	0	48	70.5	95.9	92.4	100.2	99.2	27	23.5	111.1	114.2	59.2	57
CLST032986 COG:COG1629,NOG:NOG122779,NOG:NOG85156 Receptor	0	0	2	0	0	0	0	0	0	0	0	0	52	67.3	21.6	25.4	0	0	0	0	0	0	1.8	1.8
CLST032991 COG:COG1208,KEGG:K04042 Nucleoside-diphosphate-sugar pyrophosphorylase involved in lipopolysaccharide biosynthesis/translation initiation factor 2B, gamma/epsilon subunits (eIF-2Bgamma/eIF-2Bepsilon)	0	0	0	0	0	0	0	0	0	0	0	0	2	0	0	0	0	0	0.9	0	0	0	0	0
CLST033070 TIGR:TIGR01241,COG:COG0465,KEGG:K03798 ATP-dependent Zn proteases	0	0	0	0	0	0	0	0	0	0	0	0	0	0	0	0	0	0	0	0	0	0	3.6	0
CLST033133 NOG:NOG42712 Annotation not available	2.1	3.5	0	0	0	0	0	0	0	0	0	0	0	0	0	0	0	0	0	0	0	0	0	0
CLST033144 KEGG:K01818,COG:COG2407,TIGR:TIGR01089 L-fucose isomerase and related proteins	10.6	10.6	6.1	7.2	4.5	5.4	6	3	9.1	7.3	9.9	14.5	18	29.9	6.2	3	0	0	15.3	15.4	16.9	18.5	1.8	3.6
CLST033275 TIGR:TIGR01779,TIGR:TIGR01786,KEGG:K02014,COG:COG4206,TIGR:TIGR01785 Outer membrane cobalamin receptor protein	0	0	6.1	3.1	0	0	0	0	0	0	0	0	0	3.2	0	0	0	0	0	0	0	0	0	0
CLST033294 KEGG:K01868,TIGR:TIGR00418,COG:COG0441 Threonyl-tRNA synthetase	2.1	0	5.1	5.1	0	0	0	0	0	0	0	0	0	0	0	0	0	0	0	0	0	0	0	0
CLST033494 COG:COG1825,KEGG:K02897,PFAM:PF01386.12 Ribosomal protein L25 (general stress protein Ctc)	0	0	0	0	0	0	0	0	0	0	0	0	0	0	0	0	0	0	3.6	0.9	0	0	3.6	4.4
CLST033529 KEGG:K00656,TIGR:TIGR01255,COG:COG1882 Pyruvate-formate lyase	0	0	0	0	0	0	0	0	0	0.9	0	0	0	0	0	0	0	0	0	0	1.1	4.4	0.9	0.9
CLST033650 NOG:NOG114810 Receptor	4.2	3.5	7.2	6.2	0	0	0	0	0	0	0	0	7	6.4	0	0	16.9	12.7	1.8	4.5	3.2	4.4	0	0
CLST033760 KEGG:K01923,TIGR:TIGR00081,COG:COG0152 Phosphoribosylaminoimidazolesuccinocarboxamide (SAICAR) synthase	0	0	0	0	0	0	0	0	0	0	0	0	0	0	2.1	0	0	0	0	0	0	0	0	0
CLST033860 COG:COG2185,TIGR:TIGR00642,KEGG:K01847,COG:COG1884 Methylmalonyl-CoA mutase, N-terminal domain/subunit	0	0	1	0	0	0	0	0	0	0	0	0	0	0	0	0	0	0	0	0	0	0	0	0
CLST033889 COG:COG0355,KEGG:K02114,TIGR:TIGR01216 F0F1-type ATP synthase, epsilon subunit (mitochondrial delta subunit)	0	0	0	0	0	0	0	0	0	0	0	0	0	0	0	0	3.4	0	0	0	0	0	0	0
CLST033903 KEGG:K01209,COG:COG3534 Alpha-L-arabinofuranosidase	2.1	0	11.3	8.2	0	0	0	0	0	0	0	0	0	0	0	0	7.9	5.3	0	1.8	7.4	4.4	0	0
CLST033904 KEGG:K03522,PFAM:PF01012.14,COG:COG2025,PFAM:PF00766.12 Electron transfer flavoprotein, alpha subunit	41.4	23.6	0	0	0	0	0	0	0	0	0	0	0	0	0	0	0	0	8.1	7.2	0	12	5.4	1.8
CLST033965 TIGR:TIGR03350,COG:COG2885 Outer membrane protein and related peptidoglycan-associated (lipo)proteins	0	0	0	0	0	0	0	0	0	0	0	0	2	1.1	0	2	0	0	0	0	2.1	1.1	0	0
CLST034083 KEGG:K04043,COG:COG0443,TIGR:TIGR02350 Molecular chaperone	0	0	0	0	0	0	0	0	0	0	0	0	0	0	0	0	0	0	0	0	0	0	0.9	0.9
CLST034523 PFAM:PF02609.9,KEGG:K03602,NOG:NOG136923 Exodeoxyribonuclease VII	0	0	0	0	0	0	0	0	1.8	0	6.6	2.2	0	0	0	0	4.5	3.2	0	0	0	0	0	0
CLST034531 KEGG:K06896,COG:COG3568 Metal-dependent hydrolase	0	0	2	0	0	0	0	0	0	0	0	0	0	0	0	0	0	0	0	0	0	0	0	0
CLST034625 COG:COG2195,TIGR:TIGR01893,KEGG:K01270 Di- and tripeptidases	0	0	2	2.1	0	0	0	0	0	0	0	0	0	0	0	0	0	0	0	0	0	0	0	0
CLST034707 TIGR:TIGR01179,KEGG:K01784,COG:COG1087 UDP-glucose 4-epimerase	0	0	2	3.1	1.8	0	0	0	0	0	0	0	0	0	0	0	0	0	1.8	1.8	0	0	0	2.7
CLST034820 NOG:NOG42712 Annotation not available	0	0	0	0	0	0	0	0	0	0	0	0	0	0	0	0	2.3	2.1	0	0	0	0	0	0
CLST034822 COG:COG0197,TIGR:TIGR01164,KEGG:K02878 Ribosomal protein L16/L10E	0	0	0	0	0	0	0	0	0	2.7	0	0	0	0	0	0	0	0	0	0	0	0	0	0
CLST034938 hypothetical protein	0	0	0	0	1.8	2.7	0	0	4.6	4.6	0	0	0	0	0	0	6.8	4.2	0.9	0	2.1	3.3	0.9	0
CLST035042 COG:COG0342,KEGG:K12257,PFAM:PF07549.7,TIGR:TIGR01129,COG:COG0341,PFAM:PF02355.9,TIGR:TIGR00966,TIGR:TIGR00916 Preprotein translocase subunit SecD	0	0	0	0	0	0	0	0	0	0	0	0	0	0	0	0	0	0	0	0.9	0	0	1.8	3.6
CLST035164 KEGG:K01442,COG:COG3049,PFAM:PF02275.11 Penicillin V acylase and related amidases	0	0	0	0	0	0	0	0	0	0	0	0	0	0	0	0	2.3	0	0	0	0	0	0	0
CLST035218 PFAM:PF02585.10,COG:COG0363,KEGG:K02564,TIGR:TIGR00502 6-phosphogluconolactonase/Glucosamine-6-phosphate isomerase/deaminase	4.2	4.7	0	0	0	0	0	0	0	0	0	0	0	0	0	0	0	0	2.7	2.7	0	0	2.7	5.3
CLST035319 PFAM:PF00378.13,KEGG:K01715,COG:COG1024 Enoyl-CoA hydratase/carnithine racemase	1.1	0	0	0	0	0	0	0	1.8	0	3.3	0	0	0	0	0	0	0	9.9	7.2	3.2	2.2	0	0
CLST035382 COG:COG0840,KEGG:K03406,PFAM:PF00015.14 Methyl-accepting chemotaxis protein	2.1	2.4	0	0	0	0	0	0	0	0	0	0	0	0	0	0	0	0	0	0	0	0	0	0
CLST035420 NOG:NOG133477 Receptor	0	0	0	0	0	0	0	0	0	0	0	0	2	3.2	0	0	13.5	8.4	0	0	0	0	0	0
CLST035558 PFAM:PF00342.12,COG:COG0166,KEGG:K01810 Glucose-6-phosphate isomerase	17	15.3	52.3	55.6	2.7	4.5	0	0	0	0	17.5	26.8	12	7.5	5.2	6.1	20.3	19	4.5	5.4	3.2	3.3	2.7	0
CLST035664 COG:COG1649 Uncharacterized protein conserved in bacteria	2.1	0	0	0	0	0	0	0	0	0	0	0	0	0	0	0	0	0	0	0	0	0	0	0
CLST035670 KEGG:K01209,COG:COG3534 Alpha-L-arabinofuranosidase	2.1	0	3.1	0	0	0	0	0	0	0	0	0	0	0	0	0	0	0	0	0	0	0	0	0
CLST035742 COG:COG1834,KEGG:K00613 N-Dimethylarginine dimethylaminohydrolase	2.1	0	0	0	0	0	0	0	0	0	0	0	0	0	0	0	0	0	0	0	0	0	0	0
CLST036125 PFAM:PF01041.10,KEGG:K12452,COG:COG0399 Predicted pyridoxal phosphate-dependent enzyme apparently involved in regulation of cell wall biogenesis	0	0	0	0	0	0	0	0	0	0	0	0	0	0	0	0	0	0	0	0	0	0	0	0.9
CLST036127 COG:COG0031,TIGR:TIGR01139,KEGG:K01738,TIGR:TIGR01136 Cysteine synthase	0	0	0	0	0	0	0	0	0	0	0	0	2	0	0	0	0	0	0	0	0	0	0	0
CLST036202 COG:COG0783,KEGG:K04047 DNA-binding ferritin-like protein (oxidative damage protectant)	0	0	0	0	1.8	0	0	0	0	0	0	0	0	0	0	0	0	0	0	0	0	0	0	0
CLST036220 COG:COG0526,KEGG:K03671 Thiol-disulfide isomerase and thioredoxins	0	0	0	0	0	0	0	0	0	1.8	0	0	0	0	0	0	2.3	0	0	0	0	0	0	1.8
CLST036296 COG:COG3649,TIGR:TIGR02589 Uncharacterized protein predicted to be involved in DNA repair	0	0	0	0	0	0	0	0	0	0	0	0	0	3.2	0	0	2.3	2.1	0	0	0	0	1.8	2.7
CLST036379 KEGG:K03615,TIGR:TIGR01945,COG:COG4656 Predicted NADH:ubiquinone oxidoreductase, subunit RnfC	1.1	0	2	2.1	0	0	0	0	0	0	0	0	4	5.3	5.2	4.1	4.5	4.2	5.4	7.2	8.5	10.9	0	1.8
CLST036426 NOG:NOG87922,KEGG:K02916 Ribosomal protein	0	0	0	0	0	0	0	0	0	1.8	3.3	5.6	0	0	0	0	0	0	0	0	0	0	0	0
CLST036428 COG:COG0363,KEGG:K02564,TIGR:TIGR00502 6-phosphogluconolactonase/Glucosamine-6-phosphate isomerase/deaminase	0	0	2	2.1	0	0	0	0	0	0	0	0	0	0	0	0	2.3	0	0	0	0	0	0	0
CLST036499 PFAM:PF07664.5,PFAM:PF02421.11,PFAM:PF07670.7,COG:COG0370,KEGG:K04759,TIGR:TIGR00437 Fe2+ transport system protein B	0	0	0	0	0	0	0	0	0	0	0	0	0	0	0	0	0	0	0.9	0.9	0	0	0	0
CLST036500 TIGR:TIGR00114,KEGG:K00794,COG:COG0054 Riboflavin synthase beta-chain	0	2.4	7.2	3.1	2.7	0	0	0	0	0	2.2	3.3	0	0	0	0	0	0	0	0	0	0	0	0
CLST036519 TIGR:TIGR01192,TIGR:TIGR02673,TIGR:TIGR03415,TIGR:TIGR03797,COG:COG1136,TIGR:TIGR03265,TIGR:TIGR02982,TIGR:TIGR01166,TIGR:TIGR02203,KEGG:K02003,TIGR:TIGR03608,TIGR:TIGR01193,TIGR:TIGR02211,TIGR:TIGR03864,TIGR:TIGR02770,TIGR:TIGR02633 ABC-type antimicrobial peptide transport system, ATPase component	0	0	0	0	0	3.6	0	0	0	0	0	0	0	0	0	0	0	0	0	0	0	0	0	0
CLST036872 COG:COG0459,KEGG:K04077,TIGR:TIGR02348 Chaperonin GroEL (HSP60 family)	1.1	1.2	0	0	0	0	0	0	0	0	0	0	0	0	0	0	0	0	0	0	0	0	0	0
CLST037006 COG:COG0783,KEGG:K04047 DNA-binding ferritin-like protein (oxidative damage protectant)	3.2	0	0	0	0	0	0	0	0	0	0	0	0	0	0	0	0	0	0	0	0	0	0	0
CLST037007 NOG:NOG78068 Receptor	4.2	5.9	4.1	6.2	0	0	0	0	0	0	0	0	2	1.1	0	0	0	0	0	0	0	0	0	0
CLST037077 KEGG:K02992,TIGR:TIGR01029,COG:COG0049 Ribosomal protein S7	0	0	3.1	0	0	0	2	0	6.4	5.5	0	0	0	0	0	0	0	0	0	0	0	0	0	0.9
CLST037101 COG:COG0050,KEGG:K02358,TIGR:TIGR00485 GTPases - translation elongation factors	0	0	1	2.1	0	0	5	4.9	6.4	4.6	11	12.3	0	0	0	0	1.1	1.1	2.7	1.8	0	0	9.9	6.2
CLST037159 TIGR:TIGR01049,COG:COG0051,KEGG:K02946 Ribosomal protein S10	0	2.4	5.1	0	0	0	3	4	11.9	10.1	5.5	11.2	0	0	0	0	0	0	0	0	0	3.3	0	0
CLST037194 COG:COG1152,TIGR:TIGR00316,COG:COG1614,KEGG:K11174,PFAM:PF03598.8 CO dehydrogenase/acetyl-CoA synthase beta subunit	21.2	20.1	17.4	20.6	5.4	2.7	3	0	0	0	11	16.7	3	9.6	0	0	0	0	9.9	6.3	0	2.2	3.6	0
CLST037225 KEGG:K01190,PFAM:PF02837.11,COG:COG3250,PFAM:PF02836.10 Beta-galactosidase/beta-glucuronidase	6.4	3.5	3.1	6.2	0	0	0	0	0	0	0	0	3	4.3	4.1	3	7.9	5.3	0	0	18	14.1	1.8	1.8
CLST037234 TIGR:TIGR01049,COG:COG0051,KEGG:K02946 Ribosomal protein S10	4.2	3.5	5.1	3.1	0	0	5	0	0	0	0	0	0	0	0	0	0	0	7.2	9.1	0	0	4.5	5.3
CLST037426 KEGG:K10794,NOG:NOG135588 Proline reductase	4.2	9.4	0	5.1	0	0	0	0	2.7	1.8	3.3	4.5	9	7.5	0	0	0	0	10.8	14.5	0	0	0	0
CLST037457 NOG:NOG68073 Annotation not available	5.3	4.7	0	0	0	0	0	0	0	0	0	0	0	0	0	0	0	0	0	0	0	0	0	0
CLST037487 KEGG:K02112,COG:COG0055,TIGR:TIGR01039 F0F1-type ATP synthase, beta subunit	0	0	0	0	0	0	0	0	0	0	0	0	0	0	0	0	0	0	0	0	0	0	0.9	0.9
CLST037646 COG:COG3187,PFAM:PF03724.9 Heat shock protein	0	0	0	0	0	0	0	0	0	0	0	0	13	9.6	0	0	0	0	0	0	0	0	0	0
CLST037660 TIGR:TIGR01171,COG:COG0090,KEGG:K02886 Ribosomal protein L2	0	0	0	0	0	0	0	0	2.7	0	0	0	0	0	0	0	0	0	0	0	0	0	0	0
CLST037672 COG:COG0539,KEGG:K02945,TIGR:TIGR00717,PFAM:PF00575.16 Ribosomal protein S1	0	0	0	0	0	0	0	0	0.9	0	0	0	0	0	0	0	0	0	0	0	0	0	0	0
CLST037704 COG:COG0448,KEGG:K00975,TIGR:TIGR02092,TIGR:TIGR02091 ADP-glucose pyrophosphorylase	1.1	0	1	0	0	0	0	0	0	0	0	0	0	0	0	0	0	0	0	1.8	0	0	0	0
CLST037895 TIGR:TIGR01067,KEGG:K02874,COG:COG0093 Ribosomal protein L14	2.1	4.7	7.2	4.1	0	0	6	3	0	0	1.1	1.1	0	0	0	0	0	0	4.5	6.3	0	0	4.5	6.2
CLST037913 COG:COG0524,KEGG:K00847,TIGR:TIGR02152 Sugar kinases, ribokinase family	0	0	0	2.1	0	0	0	0	0	0	0	0	0	0	0	0	2.3	2.1	0	0	0	0	0	0
CLST037999 NOG:NOG68897 Alpha-Galactosidase	7.4	4.7	0	0	0	0	0	0	0	0	0	0	0	0	0	0	0	0	0	0	0	0	0	0
CLST038059 NOG:NOG84535 Major outer membrane protein	2.1	2.4	2	2.1	0	0	0	0	0	0	0	0	16	13.9	0	0	0	0	0	0	0	0	0	0
CLST038133 COG:COG0071 Molecular chaperone (small heat shock protein)	7.4	7.1	0	0	0	0	0	0	0	0	0	0	0	0	0	0	0	0	0	0	0	0	0	0
CLST038252 NOG:NOG78527 Annotation not available	0	0	0	0	0	0	0	0	0	0	0	0	0	2.1	0	0	4.5	4.2	0	0	0	0	0	0
CLST038347 COG:COG1538,PFAM:PF02321.11,TIGR:TIGR01845,TIGR:TIGR01844 Outer membrane protein	9.6	9.4	5.1	0	0	0	0	0	0	0	0	0	16	18.2	1	1	0	0	0.9	0	0	0	0	0
CLST038362 NOG:NOG10616 Annotation not available	31.8	37.8	29.7	24.7	11.6	9.1	17.1	7.9	1.8	1.8	4.4	3.3	0	0	0	0	1.1	0	26.1	16.3	0	0	21.5	16.9
CLST038562 PFAM:PF01649.11,COG:COG0268,KEGG:K02968,TIGR:TIGR00029 Ribosomal protein S20	0	0	0	0	0	0	2	0	0	0	0	0	0	0	0	0	2.3	0	0	0	0	0	0	0
CLST039014 TIGR:TIGR01251,COG:COG0462,KEGG:K00948 Phosphoribosylpyrophosphate synthetase	0	0	0	0	0	0	0	0	0	0	0	1.1	0	0	0	0	0	0	0	0	0	0	0	0
CLST039133 COG:COG2885 Outer membrane protein and related peptidoglycan-associated (lipo)proteins	5.3	9.4	7.2	5.1	0	0	0	0	0	0	0	0	5	4.3	0	2	0	0	0	1.8	0	0	0	0
CLST039161 TIGR:TIGR00998,TIGR:TIGR01730,KEGG:K03585,COG:COG0845 Membrane-fusion protein	2.1	0	0	0	0	0	0	0	0	0	0	0	0	2.1	0	0	0	0	0	0	0	0	0	0
CLST039312 KEGG:K02990,PFAM:PF01250.10,COG:COG0360 Ribosomal protein S6	0	0	0	0	0	0	0	0	0	0	0	0	0	1.1	0	0	0	0	0	0	0	2.2	0	0
CLST039326 NOG:NOG75319 Annotation not available	0	3.5	0	0	0	0	0	0	0	0	0	0	0	0	0	0	0	0	0	0	0	0	0	0
CLST039489 PFAM:PF07719.10,COG:COG0457,PFAM:PF00515.21 FOG: TPR repeat	0	0	0	0	0	0	0	0	0	0	0	0	0	1.1	0	0	0	0	0	0	0	0	0	0
CLST039679 TIGR:TIGR01515,COG:COG0296,KEGG:K00700 1,4-alpha-glucan branching enzyme	2.1	0	0	0	0	0	0	0	0	0	0	0	0	0	0	0	0	0	0	0	0	0	0	0
CLST039699 PFAM:PF02482.12,KEGG:K05808,COG:COG1544 Ribosome-associated protein Y (PSrp-1)	0	1.2	0	0	0	0	0	0	0	2.7	0	1.1	3	1.1	0	0	0	0	0	0.9	2.1	0	0	0
CLST039744 PFAM:PF00465.12,KEGG:K00100,TIGR:TIGR02638,KEGG:K04072,COG:COG1454 Alcohol dehydrogenase, class IV	4.2	0	6.1	6.2	0	0	0	0	4.6	5.5	2.2	1.1	2	6.4	4.1	9.1	0	0	3.6	5.4	2.1	3.3	1.8	1.8
CLST039796 TIGR:TIGR01067,KEGG:K02874,COG:COG0093 Ribosomal protein L14	0	0	0	0	0	0	0	0	3.7	7.3	0	0	0	0	0	0	0	0	0	0	0	0	0	0
CLST039803 COG:COG3525,KEGG:K12373,PFAM:PF00728.15 N-acetyl-beta-hexosaminidase	2.1	5.9	0	0	0	0	0	0	0	0	0	0	0	0	0	0	0	0	0	0	0	0	0	0
CLST039845 COG:COG0205,TIGR:TIGR02482,KEGG:K00850 6-phosphofructokinase	1.1	1.2	0	0	0	0	0	0	0	0	0	0	0	0	0	1	0	0	0	0	0	0	0	0
CLST039879 TIGR:TIGR02176,COG:COG1014,KEGG:K03737,COG:COG0674,COG:COG1013 Pyruvate:ferredoxin oxidoreductase and related 2-oxoacid:ferredoxin oxidoreductases, beta subunit	134.8	188.8	60.5	72.1	0.9	0	62.5	27.7	5.5	5.5	12.1	23.4	5	8.5	19.6	15.2	21.4	16.9	66.6	54.3	0	0	67.2	59.6
CLST039965 TIGR:TIGR03451,KEGG:K00002,COG:COG1063,TIGR:TIGR02819,KEGG:K00100,TIGR:TIGR00692 Threonine dehydrogenase and related Zn-dependent dehydrogenases	2.1	0	2	0	0	0	0	0	0	0	2.2	0	0	0	0	0	0	0	4.5	1.8	0	2.2	0	2.7
CLST039979 KEGG:K01849,TIGR:TIGR00640,COG:COG2185 Methylmalonyl-CoA mutase, C-terminal domain/subunit (cobalamin-binding)	10.6	10.6	0	0	6.3	3.6	0	0	0	0	0	0	0	0	24.7	25.4	0	0	0	0	0	0	0	0
CLST040002 TIGR:TIGR00705,PFAM:PF01343.11,KEGG:K04773,TIGR:TIGR00706,COG:COG0616 Periplasmic serine proteases (ClpP class)	0	0	0	0	0	0	0	0	0	0	0	0	3	0	0	0	0	0	0	0	0	2.2	0	0
CLST040023 NOG:NOG12793,NOG:NOG147378 Annotation not available	0	0	0	0	0	0	0	0	0	0	0	0	3	0	0	0	0	0	0	0	0	0	0	0
CLST040032 COG:COG0686,KEGG:K00259,TIGR:TIGR00518 Alanine dehydrogenase	4.2	2.4	10.2	14.4	0	0	0	0	0	0	0	0	0	0	11.3	7.1	0	0	2.7	4.5	0	2.2	4.5	3.6
CLST040248 NOG:NOG86956 Annotation not available	0	0	5.1	4.1	0	0	0	0	0	0	0	0	3	3.2	0	0	0	0	0	0	0	0	0	0
CLST040278 TIGR:TIGR01241,COG:COG0465,KEGG:K03798,TIGR:TIGR00368 ATP-dependent Zn proteases	0	0	0	0	0	0	0	0	0	0	0	0	0	0	0	0	0	0	0.9	0.9	0	0	0	0
CLST040397 TIGR:TIGR03350,COG:COG2885 Outer membrane protein and related peptidoglycan-associated (lipo)proteins	0	5.9	3.1	2.1	0	0	0	0	0	0	0	0	9	10.7	0	3	0	0	0	0	4.2	3.3	0	0
CLST040446 KEGG:K00262,PFAM:PF02812.11,COG:COG0334,PFAM:PF00208.14 Glutamate dehydrogenase/leucine dehydrogenase	1.1	0	0	0	0	0	0	0	0.9	0.9	0	0	0	0	0	0	0	0	0	0	6.3	1.1	0	0
CLST040459 TIGR:TIGR02487,KEGG:K00527,PFAM:PF03477.9 NrdD: anaerobic ribonucleoside-triphosphate reductase	0	0	0	0	0	0	0	0	0	0	0	0	0	0	0	0	0	0	0	0	0	0	0	1.8
CLST040497 TIGR:TIGR01998,COG:COG1264,COG:COG1263,KEGG:K02804 Phosphotransferase system IIC components, glucose/maltose/N-acetylglucosamine-specific	3.2	7.1	11.3	3.1	0	0	0	0	0	0	2.2	0	0	0	0	0	0	0	0	0	0	0	0	0
CLST040771 NOG:NOG39872 Receptor	0	1.2	0	0	0	0	0	0	0	0	0	0	0	0	0	0	0	0	0	0	0	0	0	0
CLST041162 KEGG:K01802,COG:COG0545,PFAM:PF01346.11 FKBP-type peptidyl-prolyl cis-trans isomerases 1	1.1	3.5	0	0	0	0	0	0	0	0	0	0	0	0	0	0	0	0	0	3.6	0	0	0	0
CLST041176 hypothetical protein	0	0	0	0	0	0	0	0	0	0	0	0	0	0	0	0	0	0	1.8	0.9	0	0	0	0
CLST041286 COG:COG2373 Large extracellular alpha-helical protein	0	0	0	0	0	0	0	0	0	0	0	0	3	4.3	0	0	0	0	0	0	0	0	0	0
CLST041321 NOG:NOG125726 Receptor	0	0	0	0	0	0	0	0	0	0	0	0	24	27.8	0	0	0	0	0	0	7.4	13.1	0	0
CLST041427 COG:COG3937 Uncharacterized conserved protein	0	0	0	0	0	1.8	1	0	0	0	0	4.5	0	0	0	0	0	2.1	0	0	0	0	0	0
CLST041633 KEGG:K02838,TIGR:TIGR00496,COG:COG0233 Ribosome recycling factor	0	0	0	0	0	0	0	0	0	0	0	2.2	0	0	0	0	0	0	0	0	0	0	0	0
CLST041726 COG:COG1012,PFAM:PF00465.12,TIGR:TIGR02638,TIGR:TIGR02518,KEGG:K04072,COG:COG1454 NAD-dependent aldehyde dehydrogenases	0	0	0	0	0	0	0	0	0	0	0	0	0	0	0	0	0	0	0	0	0	0	1.8	0.9
CLST041757 COG:COG1171,TIGR:TIGR01124,TIGR:TIGR01127,KEGG:K01754 Threonine dehydratase	3.2	0	2	5.1	0	0	0	0	0	0	2.2	0	0	0	0	0	0	0	0	0	0	0	0	0
CLST041870 COG:COG1918,KEGG:K04758 Fe2+ transport system protein A	0	0	0	0	0	0	0	0	1.8	0.9	1.1	2.2	0	0	0	0	0	0	0	0	0	0	0	0
CLST041936 KEGG:K00048,TIGR:TIGR02638,COG:COG1454 Alcohol dehydrogenase, class IV	0	0	0	0	0	0	0	3	0	0	0	0	0	0	0	0	0	0	2.7	0	0	0	0	0
CLST042207 TIGR:TIGR00002,KEGG:K02959,COG:COG0228 Ribosomal protein S16	0	0	0	0	0	0	0	0	0	0	0	0	0	0	0	0	0	0	0	0	0	0	0	1.8
CLST042315 COG:COG0446,PFAM:PF00890.17,TIGR:TIGR01292,TIGR:TIGR01813,PFAM:PF07992.7,TIGR:TIGR03143,KEGG:K00302 Uncharacterized NAD(FAD)-dependent dehydrogenases	0	0	0	0	0	0	0	0	0	0	0	0	0	0	0	0	0	0	1.8	1.8	0	0	0	0
CLST042563 NOG:NOG45442 Carboxypeptidase	0	0	0	0	0	0	0	0	0	0	0	0	0	1.1	0	0	0	0	0	0	0	0	0	0
CLST042694 COG:COG1837,KEGG:K06960 Predicted RNA-binding protein (contains KH domain)	0	0	0	0	0	0	0	0	0	0	0	0	0	2.1	0	0	0	0	0	0	0	0	0	0
CLST042835 TIGR:TIGR03627,COG:COG0103,KEGG:K02996,PFAM:PF00380.12 Ribosomal protein S9	9.6	11.8	8.2	5.1	0	0	3	0	0	1.8	4.4	3.3	0	0	0	0	0	0	18.9	20.8	0	0	4.5	8.9
CLST042863 PFAM:PF03993.5,NOG:NOG07532 Annotation not available	0	0	0	0	1.8	0	0	0	0	0	0	0	0	0	0	0	0	0	0	0	0	0	0	0
CLST043010 TIGR:TIGR00641,KEGG:K01848,COG:COG1884 Methylmalonyl-CoA mutase, N-terminal domain/subunit	18	9.4	5.1	9.3	2.7	2.7	0	0	0	0	0	0	0	0	20.6	13.2	0	0	2.7	2.7	0	0	5.4	6.2
CLST043170 COG:COG1109,PFAM:PF02878.9,KEGG:K01840,PFAM:PF02879.9 Phosphomannomutase	0	0	0	0	0.9	1.8	0	0	0	0	0	0	0	0	0	0	0	0	0	0	0	0	0	0
CLST043268 TIGR:TIGR00981,KEGG:K02950,COG:COG0048 Ribosomal protein S12	0	0	0	0	0	0	0	0	0.9	1.8	0	0	0	0	0	0	0	0	0	0	0	0	0	0
CLST043271 hypothetical protein	0	0	0	0	0	0	0	0	0	0	0	0	0	0	0	0	0	0	0	0.9	0	0	0.9	0
CLST043301 NOG:NOG133477,NOG:NOG85156 Receptor	2.1	0	0	0	0	0	0	0	0	0	0	0	3	3.2	0	0	0	0	0	0	0	2.2	0	0
CLST043395 COG:COG3250 Beta-galactosidase/beta-glucuronidase	0	0	3.1	2.1	0	0	0	0	0	0	0	0	0	0	0	0	0	0	0	0	0	0	0	0
CLST043430 COG:COG1063,KEGG:K00060,TIGR:TIGR00692 Threonine dehydrogenase and related Zn-dependent dehydrogenases	2.1	0	0	0	0	0	0	0	0	0	0	0	0	0	0	0	0	0	0	0	0	0	0	0
CLST043466 TIGR:TIGR00855,KEGG:K02935,COG:COG0222 Ribosomal protein L7/L12	0	0	0	0	1.8	0.9	0	0	0	0	0	0	0	0	0	0	0	0	0	0	0	0	0	0
CLST043564 KEGG:K01923,TIGR:TIGR00081,COG:COG0152,PFAM:PF01259.11 Phosphoribosylaminoimidazolesuccinocarboxamide (SAICAR) synthase	2.1	0	12.3	3.1	0	0	0	0	0	0	0	0	0	0	0	2	0	0	0	0	0	0	0	0
CLST043585 KEGG:K01676,PFAM:PF05683.5,COG:COG1838 Tartrate dehydratase beta subunit/Fumarate hydratase class I, C-terminal domain	0	0	0	0	0	0	0	0	1.8	4.6	0	0	0	0	0	0	0	0	0	0	0	0	0	0
CLST043599 TIGR:TIGR01003,KEGG:K11189,COG:COG1925 Phosphotransferase system, HPr-related proteins	3.2	5.9	4.1	0	0	0	12.1	0	0	0	4.4	0	0	0	0	0	0	0	2.7	4.5	0	0	5.4	2.7
CLST043661 KEGG:K01647,COG:COG0372,PFAM:PF00285.14,TIGR:TIGR01800,KEGG:K01659 Citrate synthase	0	0	0	0	0	0	0	0	0	0	3.3	0	0	3.2	0	0	0	0	0	0	0	0	0	0
CLST043712 KEGG:K01876,TIGR:TIGR00459,COG:COG0173 Aspartyl-tRNA synthetase	0	0	1	0	0	0	0	0	0	0	0	0	0	0	0	0	0	0	0	0	0	0	0	0
CLST043792 COG:COG1486,KEGG:K01232,PFAM:PF11975.1,PFAM:PF02056.9 Alpha-galactosidases/6-phospho-beta-glucosidases, family 4 of glycosyl hydrolases	0	0	0	0	0	0	0	0	0	0	2.2	0	0	0	0	0	0	0	0	0	0	0	0	0
CLST043821 KEGG:K02230,PFAM:PF02514.9,TIGR:TIGR02257,COG:COG1429,TIGR:TIGR02025 Cobalamin biosynthesis protein CobN and related Mg-chelatases	0	0	0	0	0	0	0	0	0	0	0	0	0	0	0	0	0	0	0	0	3.2	3.3	0	0
CLST043894 hypothetical protein	0	0	0	0	0	0.9	0	0	0	0	0	0	0	0	0	0	0	0	0	0	0	0	0	0
CLST043915 NOG:NOG121559,TIGR:TIGR03544 Annotation not available	1.1	3.5	0	0	0	0	0	0	0	0	5.5	3.3	0	0	0	0	0	0	0	0	0	0	0	0
CLST044022 NOG:NOG81863 Annotation not available	0	0	0	0	0	0	0	0	0	0	0	0	4	3.2	0	0	0	0	0	0	0	0	0	0
CLST044096 COG:COG2508,KEGG:K02647 Regulator of polyketide synthase expression	0	0	0	0	0	0	0	0	0	0	2.2	0	0	0	0	0	0	0	0	0	0	0	0	0
CLST044108 COG:COG0056,TIGR:TIGR00962,KEGG:K02111 F0F1-type ATP synthase, alpha subunit	10.6	15.3	1	0	2.7	0	2	0	3.7	5.5	2.2	2.2	1	2.1	0	2	1.1	1.1	0	4.5	0	0	0.9	0
CLST044213 PFAM:PF00253.14,COG:COG0199,KEGG:K02954 Ribosomal protein S14	0	0	0	0	0	0	0	0	1.8	2.7	0	0	0	0	0	0	0	0	0	0	0	0	0	0
CLST044412 TIGR:TIGR01779,TIGR:TIGR01786,KEGG:K02014,COG:COG4771 Outer membrane receptor for ferrienterochelin and colicins	0	0	0	0	0	0	0	0	0	0	0	0	0	0	0	0	0	0	0	0	0	3.3	0	0
CLST044659 NOG:NOG118395 Receptor	0	0	4.1	4.1	0	0	0	0	0	0	0	0	17	24.6	3.1	0	3.4	3.2	0	0	2.1	0	0	0
CLST044665 COG:COG1151,KEGG:K00198,TIGR:TIGR01702 6Fe-6S prismane cluster-containing protein	0	0	0	0	0	0	0	0	0	0	0	0	0	0	0	1	0	0	0	0	0	0	0	0
CLST044779 COG:COG0264,KEGG:K02357,PFAM:PF00889.12,TIGR:TIGR00116 Translation elongation factor Ts	4.2	0	0	0	0	0	0	0	0	0	0	0	0	0	3.1	3	0	0	0	0	0	0	0	0
CLST044820 TIGR:TIGR02176,KEGG:K03737,COG:COG1013 Pyruvate:ferredoxin oxidoreductase and related 2-oxoacid:ferredoxin oxidoreductases, beta subunit	0	0	0	0	0	0	0	0	0	0	0	0	0	0	0	0	0	0	0	0	0	0	1.8	0
CLST044918 TIGR:TIGR03149,COG:COG4624,TIGR:TIGR02512,PFAM:PF02906.7,PFAM:PF00037.20 Iron only hydrogenase large subunit, C-terminal domain	0	0	0	1	0	0	0	0	0	0	0	0	0	0	0	2	0	0	0	0	0	0	0	0.9
CLST045039 hypothetical protein	0	0	1	0	0	0	0	0	0	0	0	0	0	0	0	0	0	0	0	0	0	0	0	0
CLST045066 NOG:NOG40827 Annotation not available	2.1	0	0	0	0	0	0	0	0	0	0	0	1	4.3	0	0	0	0	0	0	0	0	0	0
CLST045137 KEGG:K02230,PFAM:PF02514.9,TIGR:TIGR02257,COG:COG1429,TIGR:TIGR02025 Cobalamin biosynthesis protein CobN and related Mg-chelatases	0	0	2	0	0	0	0	0	0	0	0	0	0	0	0	0	0	0	0	0	0	0	0	0
CLST045167 NOG:NOG137753 Annotation not available	0	0	5.1	8.2	0	0	0	0	0	0	1.1	0	0	0	64.9	65	0	0	0	3.6	0	0	8.1	7.1
CLST045379 hypothetical protein	0	0	0	0	0	0	0	0	0	0	0	0	0	0	0	0	0	0	0	0	0	0	0	1.8
CLST045437 hypothetical protein	0	0	0	0	0	0	0	0	0	0	0	0	0	0	0	0	0	0	0	0	0	0	0	0.9
CLST045824 KEGG:K02112,KEGG:K02133,COG:COG0055,TIGR:TIGR01039 F0F1-type ATP synthase, beta subunit	12.7	13	10.2	13.4	0.9	1.8	5	7.9	1.8	0.9	1.1	1.1	0	3.2	0	0	2.3	1.1	18.9	17.2	0	0	13.4	8.9
CLST045849 PFAM:PF02482.12,KEGG:K05808,COG:COG1544 Ribosome-associated protein Y (PSrp-1)	0	1.2	0	0	5.4	4.5	0	2	0	0	0	2.2	0	3.2	0	0	0	0	5.4	6.3	0	0	2.7	1.8
CLST045917 KEGG:K00762,TIGR:TIGR00336,COG:COG0461 Orotate phosphoribosyltransferase	0	0	5.1	4.1	0	0	3	0	0	0	0	0	0	0	0	0	0	0	1.8	0	0	0	0	0
CLST045993 TIGR:TIGR03631,COG:COG0099,KEGG:K02952 Ribosomal protein S13	0	0	0	3.1	0	0.9	0	0	0	0	1.1	2.2	0	0	0	0	0	4.2	11.7	10	0	0	0	1.8
CLST046043 COG:COG0238,KEGG:K02963,PFAM:PF01084.13,TIGR:TIGR00165 Ribosomal protein S18	0	0	0	0	0	0	0	0	1.8	7.3	0	2.2	0	0	0	0	0	2.1	0	0	0	0	0	0
CLST046097 TIGR:TIGR02813,COG:COG3321,KEGG:K10817 Polyketide synthase modules and related proteins	0	0	0	0	0	0	0	0	0	0	0	0	0	0	0	0	0	0	0	0	0	0	4.5	4.4
CLST046160 NOG:NOG148246 Receptor	1.1	0	0	2.1	0	0	0	0	0	0	0	0	0	0	0	0	0	0	0	0	0	0	0	0
CLST046226 COG:COG0071 Molecular chaperone (small heat shock protein)	0	0	0	0	0	0	0	0	0	0	0	0	0	0	0	0	0	0	0	0	0	0	3.6	0
CLST046300 TIGR:TIGR02349,KEGG:K03686,COG:COG0484,COG:COG2214,PFAM:PF01556.11 DnaJ-class molecular chaperone	0	2.4	0	0	0	0	0	0	0	0	0	0	0	0	0	0	0	0	0	0	0	0	0	0
CLST046926 hypothetical protein	0	0	0	0	0	0	0	0	0	0	0	0	1	0	0	0	0	0	1.8	0	0	0	0	0
CLST047163 NOG:NOG85887 Receptor	8.5	5.9	0	0	0	0	0	0	0	0	0	0	5	2.1	0	0	0	0	0	0	0	3.3	0	0
CLST047254 KEGG:K04078,PFAM:PF00166.14,COG:COG0234 Co-chaperonin GroES (HSP10)	1.1	5.9	0	0	0	0	4	2	0	0	0	0	0	0	0	0	0	0	0	0	0	0	0	0
CLST047343 KEGG:K01785,TIGR:TIGR02636,COG:COG2017 Galactose mutarotase and related enzymes	0	0	0	0	0	0	0	0	0	0	0	0	0	0	0	0	0	0	1.8	2.7	0	0	0	0
CLST047380 PFAM:PF02929.10,KEGG:K01190,PFAM:PF02837.11,COG:COG3250,PFAM:PF02836.10 Beta-galactosidase/beta-glucuronidase	2.1	0	0	0	0	0	0	0	0	0	0	0	0	0	0	0	0	0	0	0	0	0	0	0
CLST047449 KEGG:K00764,COG:COG0034,TIGR:TIGR01134 Glutamine phosphoribosylpyrophosphate amidotransferase	2.1	0	0	6.2	0	0	0	0	0	0	0	0	0	0	0	0	0	0	0	0	0	0	0	0
CLST047621 TIGR:TIGR00683,COG:COG0329,KEGG:K01639 Dihydrodipicolinate synthase/N-acetylneuraminate lyase	0	0	0	0	0	0	0	0	0	0	0	0	0	0	0	2	0	0	0	0	0	0	0	0
CLST047761 COG:COG0071 Molecular chaperone (small heat shock protein)	0	0	0	0	0	0	0	0	0	0	0	0	0	0	0	0	0	0	2.7	4.5	0	0	5.4	4.4
CLST047866 NOG:NOG78527 Annotation not available	3.2	5.9	2	0	0	0	0	0	0	0	0	0	0	0	0	0	0	0	0	0	0	0	0	0
CLST047872 NOG:NOG38873 Annotation not available	2.1	2.4	0	0	0	0	0	0	0	0	0	0	4	3.2	0	0	0	0	0	0	0	0	0	0
CLST047927 COG:COG0526,KEGG:K02199 Thiol-disulfide isomerase and thioredoxins	0	0	0	0	0	0	0	0	0	0	0	0	0	0	0	0	0	0	0	0	2.1	0	0	0
CLST047941 COG:COG1629 Outer membrane receptor proteins, mostly Fe transport	0	0	0	0	0	0	0	0	0	0	0	0	3	5.3	0	0	0	0	0	0	30.7	32.6	0	0
CLST047980 COG:COG3507 Beta-xylosidase	0	0	0	0	0	0	0	0	0	0	0	0	0	0	0	0	4.5	4.2	0	0	0	0	0	0
CLST048085 hypothetical protein	0	0	0	0	0	0	0	0	0	0	0	0	0	0	26.8	27.4	0	0	0	0	0	0	0	0
CLST048227 TIGR:TIGR00760,KEGG:K01786,COG:COG0235 Ribulose-5-phosphate 4-epimerase and related epimerases and aldolases	0	0	0	0	0	0	0	0	0	0	0	0	1	0	0	0	0	0	0	0	0	0	0	0
CLST048276 KEGG:K00262,PFAM:PF02812.11,COG:COG0334,PFAM:PF00208.14 Glutamate dehydrogenase/leucine dehydrogenase	2.1	1.2	0	1	11.6	12.7	1	0	7.3	6.4	2.2	4.5	2	2.1	2.1	2	0	0	0.9	0.9	1.1	2.2	0.9	1.8
CLST048428 COG:COG3525,KEGG:K12373,PFAM:PF00728.15 N-acetyl-beta-hexosaminidase	5.3	8.3	5.1	6.2	0	0	0	0	0	0	0	0	19	23.5	30.9	25.4	11.3	6.3	3.6	5.4	6.3	5.4	7.2	8
CLST048454 KEGG:K01710,TIGR:TIGR01181,COG:COG1088 dTDP-D-glucose 4,6-dehydratase	0	0	0	0	0	0	0	0	0	0	0	0	3	0	3.1	0	0	0	0	0	0	0	0	0
CLST048473 hypothetical protein	0	0	0	3.1	0	0	0	0	0	0	0	0	17	15	0	0	0	0	0	0	0	5.4	0	0
CLST048540 TIGR:TIGR02474,NOG:NOG119105 Annotation not available	0	0	0	3.1	0	0	0	0	0	0	0	0	0	0	0	0	0	0	0	0	0	0	0	0
CLST048596 NOG:NOG77711 Annotation not available	0	0	5.1	5.1	0	0	0	0	0	0	0	0	0	0	2.1	3	5.6	3.2	1.8	2.7	6.3	0	0	0
CLST048658 PFAM:PF00464.12,KEGG:K00600,COG:COG0112 Glycine/serine hydroxymethyltransferase	0	0	0	0	0	0	0	0	0	0	1.1	0	0	0	0	0	0	0	0	3.6	0	0	0.9	0.9
CLST048775 NOG:NOG04067 Annotation not available	0	0	0	0	0	0	0	0	0	0	0	0	0	0	0	0	0	0	0	0	4.2	2.2	0	0
CLST048828 COG:COG2373 Large extracellular alpha-helical protein	0	0	0	0	0	0	0	0	0	0	0	0	0	0	0	0	0	0	0	0	6.3	10.9	0	0
CLST049034 hypothetical protein	3.2	2.4	0	0	0	0	0	0	0	0	0	0	0	0	3.1	0	2.3	0	0	0	7.4	8.7	0	0
CLST049049 PFAM:PF07719.10,PFAM:PF00515.21,NOG:NOG69570 Annotation not available	0	2.4	0	0	0	0	0	0	0	0	0	0	0	0	0	0	0	0	0	0	0	0	0	0
CLST049060 COG:COG3525,KEGG:K12373,PFAM:PF00728.15 N-acetyl-beta-hexosaminidase	1.1	0	0	0	0	0	0	0	0	0	0	0	0	2.1	0	0	0	0	0	0	0	0	0	0
CLST049064 hypothetical protein	0	0	0	0	0.9	0	0	0	0	0	0	0	0	0	0	0	0	0	0	0	0	0	0	0
CLST049145 TIGR:TIGR02203,KEGG:K06147,TIGR:TIGR02770,TIGR:TIGR02204,COG:COG1132 ABC-type multidrug transport system, ATPase and permease components	0	0	0	0	0	0	0	0	0	0	0	6.7	0	0	0	0	0	0	0	0	0	0	0	0
CLST049146 COG:COG4822,KEGG:K02190,PFAM:PF06180.4 Cobalamin biosynthesis protein CbiK, Co2+ chelatase	0	0	0	0	0	0	0	0	0	0	0	0	0	0	0	0	0	0	0	0	5.3	3.3	0	0
CLST049283 NOG:NOG127119 Annotation not available	0	0	0	0	0	0	0	0	0	0	0	0	0	0	4.1	3	0	0	0	0	0	0	0	0
CLST049349 PFAM:PF10531.2,KEGG:K01991,COG:COG1596 Periplasmic protein involved in polysaccharide export	0	0	0	0	0	0	0	0	0	0	0	0	0	0	0	0	0	2.1	0	0	3.2	4.4	0	0
CLST049433 COG:COG0050,KEGG:K02358,TIGR:TIGR00485 GTPases - translation elongation factors	14.9	23.6	34.8	34	9	7.3	23.2	22.8	0	0	50.4	65.8	0	0	0	0	0	1.1	56.7	39.8	0	0	39.4	40
CLST049500 COG:COG3187,PFAM:PF03724.9 Heat shock protein	0	0	0	0	0	0	0	0	0	0	0	0	0	2.1	3.1	2	2.3	3.2	0	0	3.2	3.3	0	0
CLST049511 COG:COG3525,KEGG:K12373,PFAM:PF00728.15 N-acetyl-beta-hexosaminidase	0	0	0	0	0	0	0	0	0	0	0	0	0	0	3.1	4.1	0	0	0	0	0	0	0	0
CLST049536 COG:COG1752,PFAM:PF01734.15,KEGG:K07001 Predicted esterase of the alpha-beta hydrolase superfamily	0	0	0	0	0	0	0	0	0	0	0	0	3	2.1	0	0	0	0	0	0	2.1	0	0	0
CLST049703 NOG:NOG85156 Receptor	0	0	0	0	0	0	0	0	0	0	0	0	41	54.5	0	0	6.8	3.2	0	0	0	0	0	0
CLST049721 KEGG:K01803,COG:COG0149,PFAM:PF00121.11 Triosephosphate isomerase	4.2	7.1	24.6	22.7	0	0	0	0	0	0	2.2	0	19	26.7	22.7	17.3	13.5	9.5	12.6	22.6	0	0	0	0
CLST049764 PFAM:PF03435.11,COG:COG1748,KEGG:K00290 Saccharopine dehydrogenase and related proteins	0	2.4	0	0	0	0	0	0	0	0	0	0	0	0	0	0	0	0	0	0	0	0	0	0
CLST049953 COG:COG0224,KEGG:K02115,TIGR:TIGR01146 F0F1-type ATP synthase, gamma subunit	2.1	2.4	0	0	0	0	0	0	0	0	0	0	0	0	0	0	0	0	0	0	0	0	0	0
CLST050004 COG:COG1538,PFAM:PF02321.11,KEGG:K03287 Outer membrane protein	0	0	0	0	0	0	0	0	0	0	0	0	6	5.3	0	2	0	0	0	0	4.2	6.5	0	0
CLST050035 KEGG:K03286,COG:COG2885,TIGR:TIGR02802 Outer membrane protein and related peptidoglycan-associated (lipo)proteins	1.1	1.2	34.8	31.9	0	0	0	0	15.5	22	0	0	13	18.2	44.3	38.6	33.8	32.7	13.5	7.2	0	2.2	3.6	3.6
CLST050181 NOG:NOG118395,NOG:NOG125607 Receptor	2.1	7.1	7.2	6.2	0	0	0	0	0	0	0	0	28	43.8	4.1	6.1	0	0	0	0	0	0	0	0
CLST050343 NOG:NOG43529 Annotation not available	0	0	0	0	0	0	0	0	0	0	0	0	0	0	0	0	0	0	0	0	3.2	4.4	0	0
CLST050404 NOG:NOG12793,NOG:NOG147378,NOG:NOG148246 Annotation not available	0	0	0	0	0	0	0	0	0	0	0	0	0	0	0	0	1.1	0	0	0	0	0	0	0
CLST050442 NOG:NOG133738,NOG:NOG85156 Receptor	0	1.2	1	0	0	0	0	0	0	0	0	0	0	0	0	0	0	0	0	0	0	0	0	0
CLST050567 PFAM:PF02321.11,NOG:NOG83653 Annotation not available	0	0	0	0	0	0	0	0	0	0	0	0	0	0	0	0	0	0	0	0	0	2.2	0	0
CLST050642 TIGR:TIGR01322,KEGG:K01212,COG:COG1621,PFAM:PF00251.13 Beta-fructosidases (levanase/invertase)	0	0	0	0	0	0	0	0	0	0	0	0	0	0	0	0	7.9	5.3	0	0	20.1	21.8	0	0
CLST050781 NOG:NOG148246 Receptor	0	0	0	4.1	0	0	0	0	0	0	0	0	30	22.4	0	2	0	0	0	0	20.1	12	0	0
CLST050815 NOG:NOG05973 Integration host factor	0	0	0	0	0	0	5	4	10	11.9	7.7	8.9	0	0	5.2	5.1	3.4	6.3	0	0	0	0	0	0
CLST050936 KEGG:K00226,COG:COG0167,TIGR:TIGR01037 Dihydroorotate dehydrogenase	0	0	0	0	0	0	0	0	0	0	0	0	0	0	3.1	2	0	2.1	0	0	5.3	4.4	0	0
CLST051104 KEGG:K01077,NOG:NOG140086,COG:COG1785 Alkaline phosphatase	2.1	0	0	2.1	0	0	0	0	0	0	0	0	0	0	0	0	0	0	0	0	0	0	0	0
CLST051192 NOG:NOG137892 Annotation not available	0	0	7.2	9.3	0	0	0	0	0	0	0	0	0	2.1	0	0	11.3	13.7	0	0	29.6	27.2	0	0
CLST051368 KEGG:K00925,TIGR:TIGR00016,COG:COG0282 Acetate kinase	2.1	0	0	0	0	0	0	0	1.8	1.8	0	0	0	0	0	0	0	0	0	0	0	0	0	0
CLST051382 KEGG:K01803,COG:COG0149,PFAM:PF00121.11 Triosephosphate isomerase	0	0	0	0	0	0	0	0	0	0	0	0	0	0	1	1	0	0	0	0	0	0	0	0
CLST051405 COG:COG1151,KEGG:K00198,PFAM:PF03063.13,TIGR:TIGR01702 6Fe-6S prismane cluster-containing protein	11.7	21.2	6.1	9.3	10.8	9.1	3	4.9	0	2.7	5.5	16.7	0	0	0	0	0	0	9	9.1	0	0	7.2	6.2
CLST051496 COG:COG3444,TIGR:TIGR00854,KEGG:K02745 Phosphotransferase system, mannose/fructose/N-acetylgalactosamine-specific component IIB	0	0	0	0	0	0	0	0	0	0	0	0	0	0	2.1	2	0	0	0	0	0	0	0	0
CLST051510 NOG:NOG69778 Annotation not available	0	0	0	0	0	0	0	0	0	0	0	0	0	3.2	0	0	0	0	0	0	6.3	2.2	0	0
CLST051521 NOG:NOG114398,PFAM:PF00582.19 Universal stress protein	0	0	2	0	0	0	0	0	0	0	0	0	0	0	0	0	0	0	0	1.8	0	0	0	0
CLST051795 KEGG:K01803,NOG:NOG43639 Annotation not available	0	0	0	0	0	0	0	0	0	0	0	0	0	0	0	0	0	0	0.9	0.9	0	0	0	0
CLST051893 COG:COG0526,TIGR:TIGR01068 Thiol-disulfide isomerase and thioredoxins	0	0	0	0	0	0	0	0	0	0	0	0	0	0	2.1	0	0	0	0	4.5	0	0	0.9	0
CLST051947 NOG:NOG40827 Annotation not available	0	0	0	0	0	0	0	0	0	0	0	0	2	2.1	0	0	5.6	5.3	0	0	4.2	5.4	0	0
CLST052058 NOG:NOG114620,KEGG:K07114 Receptor	0	4.7	0	0	0	0	0	0	0	0	0	0	4	5.3	7.2	11.2	2.3	0	1.8	1.8	2.1	2.2	1.8	1.8
CLST052189 TIGR:TIGR00114,KEGG:K00794,COG:COG0054 Riboflavin synthase beta-chain	0	0	0	0	0	0	0	0	0	0	6.6	0	0	0	0	0	0	0	0	0	0	0	0	0
CLST052289 NOG:NOG75757 Receptor	0	0	0	0	0	0	0	0	0	0	0	0	3	3.2	0	0	0	0	0	0	0	0	0	0
CLST052355 COG:COG0495,KEGG:K01869,TIGR:TIGR00396 Leucyl-tRNA synthetase	2.1	1.2	0	0	0	0	0	0	0	0	0	0	0	0	0	0	0	0	0	0	0	0	0	0
CLST052567 COG:COG2234,KEGG:K01423 Predicted aminopeptidases	0	0	0	0	0	0	0	0	0	0	0	0	4	3.2	0	2	0	0	0	0	6.3	4.4	0	0
CLST052651 COG:COG1505,PFAM:PF02897.8,KEGG:K01322,PFAM:PF00326.14 Serine proteases of the peptidase family S9A	1.1	0	0	0	0	0	0	0	0	0	0	0	0	0	0	0	0	0	0	0	0	0	0	0
CLST052683 NOG:NOG71724 Tonb-Dependent protein	6.4	0	3.1	0	0	0	0	0	0	0	0	0	16	12.8	7.2	8.1	3.4	3.2	0	0	12.7	14.1	0	0
CLST052717 COG:COG1506,TIGR:TIGR02800,PFAM:PF07676.5,KEGG:K12854 Dipeptidyl aminopeptidases/acylaminoacyl-peptidases	0	1.2	2	0	0	0	0	0	0	0	0	0	0	0	0	0	0	0	0	1.8	3.2	3.3	0	0
CLST052733 KEGG:K01077,PFAM:PF00245.13,COG:COG1785 Alkaline phosphatase	0	0	0	0	0	0	0	0	0	0	0	0	4	3.2	0	2	0	0	0	0	0	3.3	0	0
CLST052763 NOG:NOG38873 Annotation not available	0	0	3.1	4.1	0	0	0	0	0	0	0	0	9	5.3	0	0	0	0	0	0	0	0	0	0
CLST052854 COG:COG0264,KEGG:K02357,PFAM:PF00889.12,TIGR:TIGR00116 Translation elongation factor Ts	2.1	0	0	0	0	0	0	0	0	0.9	0	0	0	0	0	0	0	0	0	0.9	0	0	0	0
CLST053105 NOG:NOG12793 Calcium ion binding protein	0	0	113.7	149.3	0	0	0	0	0	0	0	6.7	0	0	225.7	215.2	39.4	35.9	4.5	5.4	41.2	38.1	0	2.7
CLST053106 NOG:NOG145290,NOG:NOG120581 Avirulence protein	0	0	0	0	0	0	0	0	0	0	0	0	0	0	8.2	8.1	0	3.2	4.5	4.5	543.7	574.3	0	0
CLST053147 TIGR:TIGR00658,KEGG:K00611,COG:COG0078 Ornithine carbamoyltransferase	0	0	0	0	0	0	0	0	6.4	5.5	0	0	0	0	0	0	3.4	0	0	0	0	0	0	0
CLST053210 NOG:NOG148246 Receptor	0	0	1	0	0	0	0	0	0	0	0	0	0	0	0	0	0	0	0	0	0	0	0	0
CLST053269 hypothetical protein	2.1	0	0	0	0	0	0	0	0	0	0	0	0	0	0	0	2.3	0	0	0	0	0	0	0
CLST053532 KEGG:K01372,COG:COG3579,PFAM:PF03051.8 Aminopeptidase C	0	0	0	3.1	0	0	0	0	0	0	0	0	0	0	0	0	0	0	0	0	0	0	0	0
CLST053648 PFAM:PF01431.14,KEGG:K07386,PFAM:PF05649.6,COG:COG3590 Predicted metalloendopeptidase	4.2	0	4.1	0	0	0	0	0	0	0	0	0	5	7.5	16.5	10.1	15.8	15.8	2.7	3.6	0	4.4	1.8	0
CLST053715 NOG:NOG68073 Annotation not available	3.2	4.7	0	0	0	0	0	0	0	0	0	0	0	0	2.1	3	4.5	0	0	2.7	0	0	0	2.7
CLST053761 KEGG:K03561,COG:COG0811 Biopolymer transport proteins	0	0	0	0	0	0	0	0	0	0	0	0	0	0	6.2	7.1	0	0	4.5	1.8	0	0	0	0
CLST053779 COG:COG0205,TIGR:TIGR02482,KEGG:K00850,TIGR:TIGR02483 6-phosphofructokinase	0	0	0	0	0	0	0	0	0	0	0	5.6	0	0	0	0	0	0	0	0	0	0	0	0
CLST053962 hypothetical protein	0	0	0	0	0	0	0	0	0	0	0	0	3	2.1	0	0	0	0	0	0	0	0	0	0
CLST053971 NOG:NOG43530,PFAM:PF01841.12 Transglutaminase	4.2	0	0	0	0	0	0	0	0	0	0	0	2	2.1	3.1	0	2.3	3.2	0	0	11.6	10.9	0	0
CLST054038 TIGR:TIGR01192,TIGR:TIGR02673,TIGR:TIGR01187,TIGR:TIGR03258,TIGR:TIGR02315,COG:COG1136,TIGR:TIGR02982,TIGR:TIGR03265,KEGG:K02003,TIGR:TIGR01846,TIGR:TIGR01193,TIGR:TIGR02211,TIGR:TIGR03771 ABC-type antimicrobial peptide transport system, ATPase component	0	0	0	0	0	0	0	0	0	0	0	0	0	0	0	0	0	0	0	0	0	0	1.8	2.7
CLST054188 NOG:NOG85156 Receptor	0	0	0	0	0	0	0	0	0	0	0	0	2	1.1	0	0	0	0	0	0	0	2.2	0	0
CLST054326 NOG:NOG43567,PFAM:PF11396.1 Annotation not available	0	0	0	0	0	0	0	0	0	0	0	0	2	2.1	0	0	0	0	0	0	0	0	0	0
CLST054463 NOG:NOG39872 Receptor	4.2	5.9	4.1	0	0	0	0	0	0	0	0	0	0	0	0	0	0	0	0	0	0	0	0	0
CLST054548 COG:COG3537,TIGR:TIGR01180 Putative alpha-1,2-mannosidase	0	0	0	0	0	0	0	0	0	0	0	0	3	5.3	0	1	0	0	0	0	0	0	0	0
CLST054618 KEGG:K01802,COG:COG0545,PFAM:PF01346.11 FKBP-type peptidyl-prolyl cis-trans isomerases 1	1.1	1.2	0	2.1	0	0	0	0	0	0	0	0	0	0	0	0	0	0	0	0.9	0	0	4.5	1.8
CLST054695 NOG:NOG76270 Annotation not available	4.2	2.4	10.2	11.3	0	0	0	0	0	0	0	0	0	0	13.4	7.1	11.3	14.8	5.4	1.8	0	0	8.1	2.7
CLST054915 hypothetical protein	0	0	0	0	0	0	1	0	0	0	0	0	0	0	0	0	0	0	0	0	0	0	0	0
CLST055054 COG:COG3525,KEGG:K12373 N-acetyl-beta-hexosaminidase	0	0	0	0	0	0	0	0	0	0	0	0	0	0	0	0	0	0	0	0	0	3.3	0	0
CLST055115 COG:COG0793,COG:COG4946,PFAM:PF07676.5,KEGG:K08676 Periplasmic protease	0	0	2	0	0	0	0	0	0	0	0	0	0	0	0	0	0	0	0	0	0	0	0	0
CLST055322 NOG:NOG120581 Annotation not available	0	2.4	0	0	0	0	0	0	0	0	0	0	0	0	5.2	4.1	0	0	0	0	0	0	0	1.8
CLST055323 PFAM:PF00930.14,COG:COG0793,TIGR:TIGR02800,PFAM:PF07676.5,KEGG:K08676 Periplasmic protease	2.1	0	0	0	0	0	0	0	0	0	0	0	0	0	0	0	0	0	0	0	5.3	6.5	0	0
CLST055345 COG:COG1472,PFAM:PF00933.14,KEGG:K01188 Beta-glucosidase-related glycosidases	0	1.2	2	3.1	0	0	0	0	0	0	0	0	0	0	0	2	0	0	0	0	2.1	0	0	0
CLST055407 hypothetical protein	0	0	0	0	0	0	0	0	0	0	0	0	0	0	0	0	0	0	0	0	0	0	0.9	0
CLST055469 KEGG:K02014,NOG:NOG85156 Receptor	0	0	0	0	0	0	0	0	0	0	0	0	4	2.1	3.1	3	0	0	0	0	0	1.1	0	0
CLST055754 NOG:NOG85428,KEGG:K11934 Annotation not available	0	0	0	0	0	0	0	0	0	0	0	0	0	1.1	0	0	0	0	0	0	0	0	0	0
CLST055794 KEGG:K01278,PFAM:PF00930.14,COG:COG1506,PFAM:PF00326.14 Dipeptidyl aminopeptidases/acylaminoacyl-peptidases	0	0	2	0	0	0	0	0	0	0	0	0	0	0	0	2	4.5	0	0	0	4.2	2.2	0	0
CLST055810 NOG:NOG137025 Annotation not available	3.2	4.7	2	0	0	0	0	0	0	0	0	0	3	6.4	2.1	2	2.3	2.1	0	0	19	15.2	0	0
CLST055902 PFAM:PF00557.17,COG:COG0006,KEGG:K01271 Xaa-Pro aminopeptidase	0	0	0	0	0	0	2	0	0	0	0	0	0	0	0	0	0	0	0	0	0	0	0	0
CLST055968 COG:COG1538,PFAM:PF02321.11,KEGG:K12340 Outer membrane protein	0	0	0	0	0	0	0	0	0	0	0	0	0	0	3.1	2	0	0	0	0	0	0	0	0
CLST056233 KEGG:K02014,NOG:NOG85156 Receptor	0	0	17.4	18.5	0	0	0	0	0	0	0	0	0	0	6.2	3	9	6.3	8.1	6.3	10.6	18.5	0	0
CLST056251 COG:COG0822 NifU homolog involved in Fe-S cluster formation	18	14.2	17.4	24.7	0	0	23.2	9.9	1.8	1.8	2.2	6.7	0	0	0	0	1.1	0	23.4	23.5	0	0	37.7	36.5
CLST056343 NOG:NOG68450 Receptor	2.1	2.4	0	0	0	0	0	0	0	0	0	0	3	7.5	0	0	0	0	0	0	6.3	8.7	0	0
CLST056370 TIGR:TIGR01779,TIGR:TIGR01786,KEGG:K02014,COG:COG4771 Outer membrane receptor for ferrienterochelin and colicins	0	0	0	0	0	0	0	0	0	0	0	0	0	0	0	0	0	0	0	0	3.2	3.3	0	0
CLST056529 NOG:NOG75757 Receptor	5.3	2.4	0	0	0	0	0	0	0	0	0	0	12	17.1	23.7	19.3	11.3	7.4	1.8	1.8	0	0	0	0
CLST056604 NOG:NOG69778 Annotation not available	0	0	0	0	0	0	0	0	0	0	0	0	5	3.2	4.1	5.1	0	0	0	0	2.1	0	0	0
CLST056742 PFAM:PF02929.10,KEGG:K01190,PFAM:PF02837.11,COG:COG3250,PFAM:PF02836.10 Beta-galactosidase/beta-glucuronidase	2.1	2.4	0	0	0	0	0	0	0	0	0	0	0	0	0	0	0	0	0	0	2.1	0	0	0
CLST056835 NOG:NOG39198 Receptor	0	0	0	0	0	0	0	0	0	0	0	0	0	0	0	0	0	0	0	0	2.1	2.2	0	0
CLST056933 NOG:NOG87357 Annotation not available	0	0	0	0	0	0	0	0	0	0	0	0	0	3.2	0	2	0	0	0	0	3.2	4.4	0	0
CLST057053 NOG:NOG73277 Endo-Beta-N-Acetylglucosaminidase	0	0	0	2.1	0	0	0	0	0	0	0	0	0	0	0	0	0	0	0	0	0	0	0	0
CLST057134 COG:COG1653 ABC-type sugar transport system, periplasmic component	0	0	0	0	0	0	0	0	0	0	3.3	5.6	0	0	0	0	0	0	0	0	0	0	5.4	1.8
CLST057251 PFAM:PF06964.5,KEGG:K01209,COG:COG3534 Alpha-L-arabinofuranosidase	0	0	0	0	0	0	0	0	0	0	0	0	4	5.3	0	0	0	0	0	0	0	0	0	0
CLST057272 PFAM:PF00673.14,COG:COG0094,KEGG:K02931 Ribosomal protein L5	0	0	0	0	0	0	1	0	0	0	0	0	0	0	0	0	0	0	0	0	0	0	0	0
CLST057386 COG:COG3525,KEGG:K12373,PFAM:PF00728.15 N-acetyl-beta-hexosaminidase	0	0	3.1	0	0	0	0	0	0	0	0	0	0	0	5.2	5.1	3.4	0	0	0	2.1	0	0	0
CLST057430 COG:COG1538,PFAM:PF02321.11 Outer membrane protein	3.2	0	2	0	0	0	0	0	0	0	0	0	16	24.6	17.5	16.2	0	0	0	0	8.5	10.9	0	0
CLST057686 COG:COG0339,KEGG:K01284 Zn-dependent oligopeptidases	0	0	0	0	0	0	0	0	0	0	0	0	0	0	0	0	0	3.2	0	0	0	0	0	0
CLST057790 NOG:NOG38873 Annotation not available	0	0	0	0	0	0	0	0	0	0	0	0	9	15	9.3	14.2	11.3	10.6	0	0	7.4	9.8	0	0
CLST057845 KEGG:K02014,TIGR:TIGR01785,COG:COG4771 Outer membrane receptor for ferrienterochelin and colicins	0	0	0	0	0	0	0	0	0	0	0	0	0	0	0	0	0	0	0	0	0	2.2	0	0
CLST057873 NOG:NOG120039 Annotation not available	0	0	0	0	0	0	0	0	0	0	0	0	7	6.4	2.1	3	0	0	0	0	8.5	17.4	0	0
CLST057979 NOG:NOG41021 Annotation not available	0	0	0	2.1	0	0	0	0	0	0	0	0	0	2.1	0	0	0	0	0	0	4.2	5.4	0	0
CLST058070 hypothetical protein	0	0	1	0	0	0	0	0	0	0	0	0	0	0	0	0	0	0	0	0	0	0	0	0
CLST058143 PFAM:PF11305.1 hypothetical protein	0	0	0	0	0	0	0	0	0	1.8	0	1.1	0	0	0	0	1.1	3.2	0	0	0	0	0	0
CLST058157 PFAM:PF01301.12,KEGG:K12308,COG:COG1874 Beta-galactosidase	0	0	2	0	0	0	0	0	0	0	0	0	12	18.2	0	2	0	2.1	0	0	3.2	6.5	0	0
CLST058342 PFAM:PF06964.5,KEGG:K01209,COG:COG3534 Alpha-L-arabinofuranosidase	0	0	2	2.1	0	0	0	0	0	0	0	0	0	0	0	0	0	0	0	0	0	0	0	0
CLST058361 PFAM:PF00595.17,TIGR:TIGR02038,TIGR:TIGR02037,COG:COG0265,KEGG:K01362 Trypsin-like serine proteases, typically periplasmic, contain C-terminal PDZ domain	0	0	1	5.1	0	0	0	0	0	0	0	0	0	0	0	0	0	0	0	0	0	0	0	0
CLST058404 NOG:NOG85887,KEGG:K02014,NOG:NOG85156 Receptor	0	0	0	0	0	0	0	0	0	0	0	0	10	8.5	0	0	0	0	0	0	0	0	0	0
CLST058411 NOG:NOG128467 Annotation not available	0	3.5	0	0	0	0	0	0	0	0	0	0	16	19.2	0	0	0	0	0	2.7	3.2	5.4	0	0
CLST058525 NOG:NOG85887,TIGR:TIGR01783 Receptor	10.6	11.8	0	0	0	0	0	0	0	0	0	0	7	16	0	0	0	0	0	0	0	0	0	0
CLST058531 NOG:NOG121677 Annotation not available	0	7.1	2	0	0	0	0	0	0	0	0	2.2	0	0	2.1	0	2.3	0	0.9	0	0	0	0.9	0
CLST058876 TIGR:TIGR00651,KEGG:K00625,COG:COG0280 Phosphotransacetylase	3.2	4.7	1	1	0	0	0	0	1.8	5.5	0	0	0	1.1	2.1	3	0	0	0	0.9	0	0	0	0
CLST059054 NOG:NOG85887 Receptor	14.9	17.7	25.6	15.4	0	0	0	0	0	0	0	0	40	57.7	36.1	40.6	22.5	25.3	5.4	3.6	48.7	44.6	4.5	6.2
CLST059231 NOG:NOG43736 Annotation not available	2.1	0	0	0	0	0	0	0	0	0	0	0	0	0	0	0	0	0	0	0	0	0	0	0
CLST059253 NOG:NOG76717,PFAM:PF07660.7 Annotation not available	0	0	0	0	0	0	0	0	0	0	0	0	3	3.2	0	0	0	0	0	0	0	0	0	0
CLST059362 NOG:NOG86857 Annotation not available	20.2	5.9	12.3	13.4	0	0	0	0	0	0	0	0	33	33.1	45.4	41.6	23.6	32.7	10.8	9.1	58.2	52.2	9	8.9
CLST059442 NOG:NOG86981 Annotation not available	0	0	0	0	0	0	0	0	0	0	0	0	0	0	0	2	0	0	0	0	2.1	3.3	0	0
CLST059452 NOG:NOG39908 Phosphotransferase	4.2	0	3.1	4.1	0	0	0	0	0	0	0	0	2	3.2	0	0	0	0	0	0	0	0	0	0
CLST059479 hypothetical protein	0	0	7.2	4.1	0	0	0	0	0	0	0	0	0	2.1	38.1	35.5	0	0	0	0	2.1	0	0	0
CLST059516 KEGG:K10670,PFAM:PF09338.4,NOG:NOG43946 Reductase	1.1	2.4	0	0	0	0	0	0	0	0	0	0	0	0	0	0	0	0	0	0	0	0	0	0
CLST059522 TIGR:TIGR01418,TIGR:TIGR01417,KEGG:K08483,COG:COG1080,TIGR:TIGR01828,PFAM:PF00391.16 Phosphoenolpyruvate-protein kinase (PTS system EI component in bacteria)	0	0	0	0	0	0	0	0	0	0	4.4	4.5	0	0	0	0	0	4.2	0	0	0	0	0	0
CLST059722 COG:COG1538,PFAM:PF02321.11,TIGR:TIGR01845 Outer membrane protein	0	0	2	0	0	0	0	0	0	0	0	0	0	0	0	0	0	0	0	0	0	0	0	0
CLST059775 NOG:NOG82236 Annotation not available	0	0	0	0	0	0	0	0	0	0	0	0	0	0	0	0	0	0	0	1.8	0	0	0	0
CLST059857 NOG:NOG72623,NOG:NOG114220,NOG:NOG68450,NOG:NOG148246 Annotation not available	0	0	3.1	2.1	0	0	0	0	0	0	0	0	0	0	0	0	0	0	0	0	0	0	0	0
CLST059993 NOG:NOG81375 Receptor	0	0	0	0	0	0	0	0	0	0	0	0	3	3.2	0	0	0	0	0	0	0	0	0	0
CLST060328 NOG:NOG47150 Annotation not available	4.2	1.2	4.1	0	0	0	0	0	0	0	0	0	0	0	0	0	4.5	2.1	0.9	4.5	0	0	0	4.4
CLST060752 NOG:NOG86956 Annotation not available	0	0	3.1	0	0	0	0	0	0	0	0	0	0	0	0	0	2.3	0	0	0	0	0	0	0
CLST060857 NOG:NOG77793,NOG:NOG85156,NOG:NOG39872 Receptor	0	0	27.7	19.6	0	0	0	0	0	0	0	0	12	7.5	0	0	31.5	31.7	0	0	48.7	34.8	0	0
CLST060889 TIGR:TIGR00705,PFAM:PF01343.11,KEGG:K04773,TIGR:TIGR00706,COG:COG0616 Periplasmic serine proteases (ClpP class)	0	0	2	0	0	0	0	0	0	0	0	0	0	0	3.1	4.1	3.4	0	0	0	2.1	2.2	0	0
CLST060891 TIGR:TIGR00217,PFAM:PF02446.10,COG:COG1640,KEGG:K00705 4-alpha-glucanotransferase	0	0	0	0	0	0	0	0	0	0	0	0	0	0	0	0	0	0	0	0	3.2	5.4	0	0
CLST060895 NOG:NOG126772 Annotation not available	3.2	0	0	0	0	0	0	0	0	0	0	0	2	3.2	3.1	3	0	0	2.7	0	4.2	3.3	4.5	1.8
CLST060990 COG:COG0071 Molecular chaperone (small heat shock protein)	2.1	5.9	0	0	0	0	0	0	0	0	0	0	0	0	0	0	0	0	0	0	0	0	0	0
CLST061119 NOG:NOG70856,KEGG:K02121 Subunit E	1.1	0	0	0	0	0	0	0	0	0	0	0	0	0	0	0	0	0	0	0.9	0	0	0	0
CLST061198 TIGR:TIGR00160,COG:COG1803,KEGG:K01734 Methylglyoxal synthase	0	0	0	0	0	0	0	0	0	0	0	0	0	0	0	0	0	0	0	0	0	0	0	2.7
CLST061461 hypothetical protein	0	0	0	0	0	0	0	0	0	0	0	0	0	0	0	2	0	0	0	0	0	0	0	0
CLST061506 NOG:NOG84535 Major outer membrane protein	0	0	0	0	0	0	0	0	0	0	0	0	0	1.1	0	0	3.4	5.3	0	0	16.9	12	0	0
CLST061585 NOG:NOG131537 Annotation not available	2.1	0	0	0	0	0	0	0	0	0	0	0	0	3.2	0	0	0	0	1.8	1.8	0	0	0	0
CLST061608 hypothetical protein	0	0	0	0	0	0	0	0	0	0	0	0	0	0	0	0	0	0	0	0	0	0	0.9	0
CLST061609 COG:COG4690 Dipeptidase	0	0	0	0	0	0	0	0	0	0	0	0	0	0	0	0	0	0	0	0	3.2	5.4	0	0
CLST061612 KEGG:K03545,TIGR:TIGR00115,COG:COG0544 FKBP-type peptidyl-prolyl cis-trans isomerase (trigger factor)	0	0	0	0	0	0	0	0	0	0	0	0	0	0	0	0	0	0	3.6	0.9	0	0	1.8	0
CLST061665 KEGG:K03773,COG:COG0545 FKBP-type peptidyl-prolyl cis-trans isomerases 1	0	0	0	0	0	0	0	0	0	0	0	0	5	4.3	0	0	0	0	0	0	2.1	0	0	0
CLST061771 KEGG:K01006,TIGR:TIGR01828,COG:COG0574 Phosphoenolpyruvate synthase/pyruvate phosphate dikinase	3.2	1.2	2	3.1	4.5	3.6	0	0	0	0	1.1	2.2	0	0	0	1	1.1	0	5.4	7.2	3.2	0	1.8	3.6
CLST061790 COG:COG3525,KEGG:K12373,PFAM:PF00728.15 N-acetyl-beta-hexosaminidase	0	0	0	0	0	0	0	0	0	0	0	0	0	0	2.1	2	0	2.1	0	0	4.2	3.3	0	0
CLST061817 NOG:NOG72509 Tonb-Dependent outer membrane protein	4.2	7.1	0	0	0	0	0	0	0	0	0	0	12	3.2	7.2	6.1	0	0	0	0	10.6	6.5	0	0
CLST061863 COG:COG2859,KEGG:K09797 Uncharacterized protein conserved in bacteria	0	0	0	0	0	0	0	0	0	0	0	0	0	0	0	0	3.4	2.1	0	0	0	0	0	0
CLST062037 COG:COG1524 Uncharacterized proteins of the AP superfamily	0	0	0	0	0	0	0	0	0	0	0	0	0	0	0	0	0	3.2	0	0	3.2	3.3	0	0
CLST062151 COG:COG0071 Molecular chaperone (small heat shock protein)	0	0	4.1	4.1	0.9	0	0	0	0	0	0	6.7	12	31	7.2	5.1	2.3	0	0	0	0	0	0	0
CLST062251 NOG:NOG133738,NOG:NOG85156,NOG:NOG125726 Receptor	0	0	0	0	0	0	0	0	0	0	0	0	2	0	0	0	0	0	0	0	0	3.3	0	0
CLST062276 COG:COG0550,KEGG:K03168,TIGR:TIGR01051 Topoisomerase IA	0	0	0	0	0	0	0	0	0	0	0	0	0	0	0	0	0	0	1.8	0	0	0	0	0
CLST062383 COG:COG0673 Predicted dehydrogenases and related proteins	0	0	0	0	0	0	0	0	0	0	0	0	0	0	0	2	0	0	0	0	0	0	1.8	0
CLST062617 NOG:NOG133091 Annotation not available	0	0	0	0	0	0	0	0	0	0	0	0	0	0	0	0	0	0	0	0	5.3	6.5	0	0
CLST062778 NOG:NOG81863 Annotation not available	0	0	0	0	0	0	0	0	0	0	0	0	0	0	0	0	3.4	3.2	0	0	2.1	3.3	0	0
CLST062800 NOG:NOG77348 Receptor	0	0	3.1	7.2	0	0	0	0	0	0	0	0	0	0	2.1	4.1	0	0	0	0	0	0	0	0
CLST062892 COG:COG1528 Ferritin-like protein	3.2	0	11.3	10.3	0	0	0	0	0	0	0	0	0	0	11.3	7.1	0	0	0	0	14.8	20.7	2.7	4.4
CLST062949 hypothetical protein	0	0	0	0	0	0	0	0	0	0	0	0	0	0	0	0	2.3	3.2	0	0	3.2	4.4	0	0
CLST063025 TIGR:TIGR02104,COG:COG1523,KEGG:K01200 Type II secretory pathway, pullulanase PulA and related glycosidases	0	0	0	0	0	0	0	0	0	0	0	0	0	0	0	0	0	3.2	0	0	0	0	0	0
CLST063067 KEGG:K01278,COG:COG1506 Dipeptidyl aminopeptidases/acylaminoacyl-peptidases	0	0	0	0	0	0	0	0	0	0	0	0	0	0	0	0	0	2.1	0	0	2.1	3.3	0	0
CLST063181 COG:COG0071 Molecular chaperone (small heat shock protein)	0	0	2	0	0	0	0	0	0	0	0	0	0	0	0	0	0	0	1.8	3.6	0	0	5.4	6.2
CLST063199 TIGR:TIGR01779,KEGG:K02014,COG:COG4771 Outer membrane receptor for ferrienterochelin and colicins	0	0	0	0	0	0	0	0	0	0	0	0	0	0	0	0	0	0	0	0	8.5	7.6	0	0
CLST063203 PFAM:PF08340.4,COG:COG1561 Uncharacterized stress-induced protein	0	0	0	0	0	0	0	0	0	1.8	0	0	0	0	0	0	0	0	0	0	0	0	0	0
CLST063343 COG:COG0345,KEGG:K00286 Pyrroline-5-carboxylate reductase	0	0	0	0	0	0	0	0	0	0	0	0	0	0	0	2	0	0	0	0	0	0	0	0
CLST063368 KEGG:K01952,TIGR:TIGR01735,TIGR:TIGR01739,TIGR:TIGR01737,COG:COG0046 Phosphoribosylformylglycinamidine (FGAM) synthase, synthetase domain	0	0	0	0	0	0	0	0	0	0	0	0	0	0	2.1	2	0	0	0	0	0	0	0	0
CLST063379 NOG:NOG135697 Annotation not available	0	0	4.1	2.1	0	0	0	0	0	0	0	0	3	7.5	5.2	2	0	3.2	6.3	3.6	0	0	0	0
CLST063484 COG:COG0524,KEGG:K00874 Sugar kinases, ribokinase family	0	0	0	0	0	0	0	0	0	0	0	0	0	0	0	0	0	0	0	1.8	0	0	0	0
CLST063878 KEGG:K04487,COG:COG1104,TIGR:TIGR03402 Cysteine sulfinate desulfinase/cysteine desulfurase and related enzymes	0	0	0	0	0	0	0	0	0	0	2.2	1.1	0	0	0	0	0	0	0	0	0	0	0	0
CLST063995 NOG:NOG38873 Annotation not available	0	0	3.1	2.1	0	0	0	0	0	0	0	0	0	0	0	0	4.5	5.3	0	0	9.5	4.4	0	1.8
CLST064099 NOG:NOG72623 Annotation not available	0	0	0	0	0	0	0	0	0	0	0	0	0	0	6.2	6.1	0	0	0	0	0	2.2	0	0
CLST064133 NOG:NOG84719,NOG:NOG75757,NOG:NOG85156,NOG:NOG148246 Receptor	0	0	0	0	0	0	0	0	0	0	0	0	1	0	0	0	0	0	0	0	0	0	0	0
CLST064300 KEGG:K02112,PFAM:PF02874.16,COG:COG0055,TIGR:TIGR01039 F0F1-type ATP synthase, beta subunit	0	0	0	0	0	0	0	0	0	0	0	0	0	0	0	0	2.3	0	0	0	0	0	0	0
CLST064436 NOG:NOG75428 Annotation not available	0	0	0	0	0	0	0	0	0	0	0	0	2	0	0	0	0	0	0	0	0	0	0	0
CLST064534 KEGG:K01868,TIGR:TIGR00418,COG:COG0441 Threonyl-tRNA synthetase	0	0	0	0	0	0	0	0	0	0	4.4	4.5	0	0	0	0	0	0	0	1.8	0	0	0	0
CLST064548 NOG:NOG71396 Annotation not available	0	0	3.1	0	0	0	0	0	0	0	0	0	0	0	0	0	0	0	0	0	0	0	0	0
CLST064616 NOG:NOG78527 Annotation not available	0	3.5	0	0	0	0	0	0	0	0	0	0	0	0	22.7	17.3	0	0	0	0	0	0	0	0
CLST064680 KEGG:K02601,TIGR:TIGR00922,TIGR:TIGR01956,COG:COG0250 Transcription antiterminator	0	0	1	3.1	0	0	0	0	0	0	0	0	0	0	0	0	0	0	0	0	0	0	0	0
CLST064875 TIGR:TIGR02403,KEGG:K01226,COG:COG0366,TIGR:TIGR02456,PFAM:PF00128.17 Glycosidases	0	0	0	0	0	0	0	0	0	0	0	0	0	0	0	0	0	2.1	0	0	0	0	0	0
CLST065270 NOG:NOG81375,NOG:NOG130229,NOG:NOG117801 Annotation not available	0	0	0	0	0	0	0	0	0	0	0	0	0	0	1	0	0	0	0	0	0	0	0	0
CLST065323 hypothetical protein	4.2	0	0	0	0	0	0	0	0	0	0	0	5	6.4	20.6	15.2	2.3	2.1	0	0	6.3	3.3	0	0
CLST065341 hypothetical protein	0	0	0	0	0	0	0	0	0	0	0	0	0	0	0	1	0	0	0	0	0	0	0	0
CLST065348 COG:COG1344,PFAM:PF00669.13,KEGG:K02406,PFAM:PF00700.14 Flagellin and related hook-associated proteins	0	0	3.1	2.1	0	0	0	0	0	0	0	0	0	0	0	0	0	0	56.7	36.2	0	0	0	0
CLST065408 hypothetical protein	0	0	0	0	0	0	0	0	0	0	0	0	9	8.5	0	0	0	0	0	0	0	0	0	0
CLST065739 TIGR:TIGR00392,COG:COG0060,KEGG:K01870 Isoleucyl-tRNA synthetase	0	0	0	0	0	0	0	0	0	0	0	0	0	0	0	0	0	0	0	0	0	0	0	0.9
CLST066044 KEGG:K01491,PFAM:PF02882.12,PFAM:PF00763.16,COG:COG0190 5,10-methylene-tetrahydrofolate dehydrogenase/Methenyl tetrahydrofolate cyclohydrolase	0	0	0	2.1	2.7	1.8	0	0	1.8	0	0	0	0	0	0	0	0	0	2.7	2.7	0	0	0	1.8
CLST066671 NOG:NOG124709 Receptor	0	0	4.1	4.1	0	0	0	0	0	0	0	0	0	0	2.1	0	7.9	9.5	0	0	4.2	0	0	0
CLST066807 COG:COG0203,TIGR:TIGR00059,KEGG:K02879 Ribosomal protein L17	3.2	0	0	0	0	0	2	2	0	0	0	0	0	0	0	0	0	0	0	0	0	0	0	0
CLST066982 COG:COG0205,TIGR:TIGR02478,TIGR:TIGR02482,KEGG:K00850,TIGR:TIGR02483 6-phosphofructokinase	0	0	2	0	0	0	0	0	0	0	2.2	0	0	0	0	2	2.3	2.1	0	2.7	0	0	0	0
CLST067091 KEGG:K00226,COG:COG0167,PFAM:PF01180.14 Dihydroorotate dehydrogenase	0	2.4	0	0	0	0	0	0	0	0	0	0	0	0	0	0	0	0	0	0	0	0	0	0
CLST067098 COG:COG0052,TIGR:TIGR01011,KEGG:K02967 Ribosomal protein S2	0	0	0	0	0	0	0	0	2.7	4.6	0	0	0	0	0	0	0	0	0	0	0	0	0	0
CLST067161 PFAM:PF01431.14,KEGG:K07386,PFAM:PF05649.6,COG:COG3590 Predicted metalloendopeptidase	3.2	0	0	0	0	0	0	0	0	0	0	0	0	0	0	0	0	0	0	0	0	0	0	0
CLST067419 COG:COG0822 NifU homolog involved in Fe-S cluster formation	0	0	0	0	0	0	2	5.9	4.6	4.6	1.1	0	0	0	0	0	0	0	0	0	0	0	0	0
CLST067421 NOG:NOG133096,NOG:NOG138875,NOG:NOG118395,NOG:NOG85156 Receptor	0	0	0	0	0	0	0	0	0	0	0	0	0	0	5.2	6.1	0	0	0	0	0	0	0	0
CLST067449 TIGR:TIGR02336,NOG:NOG26044,PFAM:PF09508.3 Annotation not available	7.4	13	5.1	6.2	0	0	0	0	0	2.7	0	0	0	0	0	2	0	0	0	0	0	0	0	0
CLST067622 NOG:NOG47150 Annotation not available	3.2	3.5	0	0	0	0	0	0	0	0	0	0	0	0	0	0	0	0	1.8	0.9	0	0	0	0
CLST067911 COG:COG0448,KEGG:K00975,TIGR:TIGR02091 ADP-glucose pyrophosphorylase	0	1.2	0	2.1	0	0	0	0	0	0	0	0	0	0	0	0	0	0	0	0	0	0	0	0
CLST068309 KEGG:K02058,COG:COG1879 ABC-type sugar transport system, periplasmic component	8.5	3.5	0	0	9	8.2	0	0	0	0	3.3	4.5	0	0	0	0	0	3.2	0	0	0	0	2.7	6.2
CLST068322 NOG:NOG70001 Iron-Regulated protein A	3.2	2.4	0	0	0	0	0	0	0	0	0	0	0	2.1	0	0	0	0	0	0	0	0	0	0
CLST068411 NOG:NOG72933 Annotation not available	2.1	0	0	0	0	0	0	0	0	0	0	0	0	0	0	0	0	0	0	0	0	0	0	0
CLST068726 KEGG:K00100,COG:COG1454 Alcohol dehydrogenase, class IV	0	0	0	0	0	0	0	0	0	0	0	0	0	0	0	0	0	0	1.8	8.2	0	0	3.6	2.7
CLST068986 COG:COG1653,KEGG:K02027 ABC-type sugar transport system, periplasmic component	0	0	0	0	2.7	1.8	0	0	0	0	0	0	0	0	0	0	0	0	0	0	0	0	0	0
CLST069079 hypothetical protein	6.4	4.7	0	0	0	0	0	0	0	0	0	0	6	4.3	5.2	5.1	4.5	7.4	0	0	0	0	0	0
CLST069117 COG:COG1410 Methionine synthase I, cobalamin-binding domain	25.5	23.6	13.3	16.5	8.1	10.9	11.1	5.9	6.4	5.5	6.6	4.5	15	26.7	8.2	3	0	0	14.4	12.7	0	4.4	8.1	7.1
CLST069243 TIGR:TIGR01117,COG:COG4799,KEGG:K01966 Acetyl-CoA carboxylase, carboxyltransferase component (subunits alpha and beta)	0	0	0	0	0	0	0	0	0	0	0	0	0	0	0	0	0	0	0.9	0.9	0	0	0	1.8
CLST069247 hypothetical protein	0	0	0	0	0	0	0	0	0	0	0	0	0	0	0	0	0	0	0	0	0	0	1.8	0
CLST069420 COG:COG2189,KEGG:K00571 Adenine specific DNA methylase Mod	0	0	0	0	0	0	0	0	0	0	0	0	0	1.1	0	0	0	0	0	0	0	0	0	0
CLST069729 COG:COG1538,PFAM:PF02321.11,KEGG:K03287,TIGR:TIGR01844 Outer membrane protein	0	0	0	0	0	0	0	0	0	0	0	0	2	2.1	0	0	0	0	0	0	0	0	0	0
CLST069818 TIGR:TIGR02977,KEGG:K03969,COG:COG1842 Phage shock protein A (IM30), suppresses sigma54-dependent transcription	0	0	0	0	2.7	0	0	0	0	0	0	0	0	0	0	0	0	0	0	0	0	0	0	0
CLST069846 hypothetical protein	0	0	0	0	0	0	0	0	0	0	0	0	0	0	6.2	6.1	0	0	0	0	0	0	0	0
CLST069918 hypothetical protein	0	0	0	0	0	1.8	0	0	0	0	0	0	0	0	0	0	0	0	0	0	0	0	0	0
CLST069940 PFAM:PF01915.15,COG:COG1472,KEGG:K01188 Beta-glucosidase-related glycosidases	1.1	0	0	0	0	0	0	0	0	0	0	0	0	0	0	0	0	0	0	0	0	0	0	0
CLST070040 COG:COG3894 Uncharacterized metal-binding protein	0	0	0	0	0	0	0	0	0	0	0	0	2	0	0	0	0	0	0	0	0	0	0	0
CLST070216 PFAM:PF04060.6,COG:COG1456,KEGG:K00197 CO dehydrogenase/acetyl-CoA synthase gamma subunit (corrinoid Fe-S protein)	0	8.3	6.1	0	5.4	6.3	3	0	0	0	15.4	12.3	0	4.3	0	0	0	0	5.4	0	0	0	0	6.2
CLST070283 TIGR:TIGR01251,COG:COG0462,KEGG:K00948 Phosphoribosylpyrophosphate synthetase	1.1	0	0	0	0	0	0	0	0	0	0	0	0	0	0	0	0	0	0	1.8	0	0	0	0
CLST070301 COG:COG4211,KEGG:K10541 ABC-type glucose/galactose transport system, permease component	0	0	0	0	0	0	0	0	0	0	0	0	0	0	0	0	0	0	1.8	0	0	0	0	0
CLST070305 TIGR:TIGR03631,COG:COG0099,KEGG:K02952 Ribosomal protein S13	0	0	0	0	0	0	0	0	1.8	0	0	0	0	0	0	0	0	0	0.9	0	0	0	2.7	1.8
CLST070410 TIGR:TIGR01235,COG:COG5016,PFAM:PF00364.15,KEGG:K01941,TIGR:TIGR02712,KEGG:K01960,KEGG:K01571,COG:COG0511 Biotin carboxyl carrier protein	7.4	5.9	4.1	6.2	14.3	13.6	0	3	1.8	0	6.6	5.6	8	10.7	0	0	0	0	10.8	7.2	2.1	3.3	3.6	0
CLST070447 hypothetical protein	0	0	0	0	0	0	0	0	0	0	0	0	0	0	6.2	3	0	0	0	0	0	0	0	0
CLST070531 hypothetical protein	0	0	4.1	0	0	0	0	0	0	0	0	0	0	0	0	0	4.5	0	0	0	0	0	0	0
CLST070575 hypothetical protein	0	0	2	2.1	0	0	0	0	0	0	0	0	6	0	16.5	23.3	0	0	0	0	0	0	0	0
CLST070662 COG:COG0524,KEGG:K00874 Sugar kinases, ribokinase family	0	0	0	0	0	0	0	0	0	0	0	0	0	0	4.1	0	0	0	0	0	0	0	0	0
CLST070674 COG:COG1653,KEGG:K02027 ABC-type sugar transport system, periplasmic component	0	0	0	0	0	0	0	0	0	0	0	0	0	0	2.1	2	2.3	3.2	0	0	0	0	0	0
CLST071079 COG:COG1653,KEGG:K02027 ABC-type sugar transport system, periplasmic component	3.2	3.5	0	0	0	0	0	0	0	0	4.4	4.5	0	0	0	0	0	0	0	0	0	0	0	0
CLST071080 KEGG:K01868,TIGR:TIGR00418,COG:COG0441 Threonyl-tRNA synthetase	0	1.2	0	0	0	0	0	0	0	0	0	0	0	0	0	0	0	0	0	2.7	0	0	0	0
CLST071087 COG:COG0080,TIGR:TIGR01632,KEGG:K02867 Ribosomal protein L11	1.1	0	0	0	0	0	0	1	5.5	4.6	0	0	0	0	0	0	0	0	0	0	0	0	0	0
CLST071100 hypothetical protein	0	0	0	0	0	0	0	0	0	0	0	0	0	0	0	0	0	0	0	0	3.2	3.3	0	0
CLST071351 KEGG:K02939,PFAM:PF01281.12,COG:COG0359 Ribosomal protein L9	0	0	0	0	3.6	3.6	0	0	0	0	0	0	0	0	0	0	0	0	0	0	0	0	0	0
CLST071501 hypothetical protein	0	3.5	0	0	0	0	0	0	0	0	0	0	2	7.5	0	2	0	0	0	0	0	0	0	0
CLST071538 COG:COG0524,KEGG:K00874 Sugar kinases, ribokinase family	5.3	5.9	0	0	0	0	0	0	0	0	0	0	2	0	0	0	0	0	0	0	0	0	0	0
CLST071653 hypothetical protein	3.2	3.5	0	0	0	0	0	0	0	0	0	0	0	0	0	0	3.4	3.2	0	0	0	0	0	0
CLST071712 NOG:NOG124709 Receptor	0	0	0	0	0	0	0	0	0	0	0	0	0	0	0	0	0	0	0	0	0	1.1	0	0
CLST071772 NOG:NOG84535 Major outer membrane protein	3.2	5.9	0	0	0	0	0	0	0	0	0	0	0	0	0	0	0	0	0	0	0	0	0	0
CLST071787 COG:COG2145,TIGR:TIGR00694,KEGG:K00878 Hydroxyethylthiazole kinase, sugar kinase family	0	0	0	0	0	0	0	0	0	0	2.2	0	0	0	0	0	0	0	0	0	0	0	0	0
CLST071809 PFAM:PF00162.12,COG:COG0126,KEGG:K00927 3-phosphoglycerate kinase	0	0	0	0	0	0	0	0	2.7	1.8	0	0	0	0	0	0	0	0	0	0	0	0	0	0
CLST071900 COG:COG0031,TIGR:TIGR01137,TIGR:TIGR01139,KEGG:K01738,TIGR:TIGR01136 Cysteine synthase	3.2	0	0	0	1.8	1.8	1	0	0	0	0	0	0	0	0	0	0	0	2.7	3.6	0	0	0	0
CLST071926 KEGG:K00925,TIGR:TIGR00016,COG:COG0282 Acetate kinase	0	0	0	0	1.8	0	0	0	0	0	0	0	0	0	0	0	0	0	0	0	0	0	0	0
CLST072167 PFAM:PF03577.8,KEGG:K08659,COG:COG4690 Dipeptidase	0	2.4	0	0	0	0	0	0	0	0	0	0	0	0	0	0	0	0	0	0	0	0	0	0
CLST072386 TIGR:TIGR00855,KEGG:K02935,COG:COG0222 Ribosomal protein L7/L12	0	1.2	0	0	0	0	0	0	0	0	0	0	0	0	0	0	0	0	0	0	0	0	0	0
CLST072455 KEGG:K05878,COG:COG2376,TIGR:TIGR02363 Dihydroxyacetone kinase	0	0	0	0	0	0	0	0	0	0	0	0	0	4.3	0	0	0	0	0	0	0	0	0	0
CLST072489 TIGR:TIGR01024,COG:COG0335,KEGG:K02884 Ribosomal protein L19	0	0	0	0	0	0	0	2	1.8	5.5	0	0	0	0	0	0	0	0	0	0	0	0	0	0
CLST072508 TIGR:TIGR03740,COG:COG1131,KEGG:K09687 ABC-type multidrug transport system, ATPase component	0	0	0	0	3.6	4.5	0	0	0	0	0	0	0	0	0	0	0	0	0	0	0	0	0	0
CLST072511 COG:COG1472,KEGG:K05349 Beta-glucosidase-related glycosidases	0	2.4	0	0	0	0	0	0	0	0	0	0	2	3.2	0	0	0	0	0	0	0	0	0	0
CLST072736 COG:COG0783,KEGG:K04047 DNA-binding ferritin-like protein (oxidative damage protectant)	4.2	3.5	0	0	0	0	0	0	0	0	0	0	0	0	0	0	0	0	0	0	0	0	0	0
CLST072980 TIGR:TIGR00855 L12: ribosomal protein L7/L12	0	0	0	0	0	0	1	0	1.8	0	0	0	0	0	0	0	0	0	0	0	0	0	0	0
CLST073150 NOG:NOG114702,TIGR:TIGR03544 Cell division protein	0	0	0	0	0	0	0	0	0	0	13.2	0	0	0	0	0	0	0	0	0	0	0	0	0
CLST073165 TIGR:TIGR01391,KEGG:K02316,COG:COG0358,PFAM:PF01807.13 DNA primase (bacterial type)	0	0	0	0	0	0	0	0	0	0	0	0	0	0	0	1	0	0	0	0	0	0	0	0
CLST073234 NOG:NOG68073 Annotation not available	8.5	3.5	0	0	0	0	0	0	0	0	0	0	0	0	0	0	0	0	0	0	0	0	0	0
CLST073250 KEGG:K04043,COG:COG0443,TIGR:TIGR02350 Molecular chaperone	0	0	0	0	0	0	0	0	1.8	0.9	0	0	0	0	0	0	0	0	0	0	0	0	0	0
CLST073775 KEGG:K06113,COG:COG3507 Beta-xylosidase	0	0	0	3.1	0	0	0	0	0	0	0	0	0	0	0	0	6.8	7.4	0	0	0	2.2	0	0
CLST074403 hypothetical protein	0	0	0	0	0	0	0	0	0	0	0	0	0	0	0	0	0	0	0	0	0	0	0.9	0
CLST074664 COG:COG0524,KEGG:K00874 Sugar kinases, ribokinase family	18	15.3	3.1	7.2	0	0	2	3	0	0	0	0	0	0	0	0	0	0	4.5	2.7	0	0	0	0
CLST074673 KEGG:K04043,COG:COG0443,TIGR:TIGR02350 Molecular chaperone	0	0	0	0	0	0	0	0	0	0	0	0	0	0	0	0	0	0	0	0.9	0	0	0	0
CLST074676 KEGG:K10439 hypothetical protein	2.1	3.5	0	0	0	0	0	0	0	0	0	0	0	0	0	0	0	0	0	0	0	0	0	0
CLST074738 NOG:NOG133477 Receptor	5.3	3.5	0	0	0	0	0	0	0	0	0	0	0	0	21.6	18.3	0	0	0	0	0	0	0	0
CLST074821 COG:COG0448,KEGG:K00975,TIGR:TIGR02091 ADP-glucose pyrophosphorylase	1.1	1.2	2	2.1	0	0	0	0	0	0	0	0	0	0	0	2	0	0	0	0.9	0	0	0	0
CLST074845 KEGG:K02906,TIGR:TIGR03626,COG:COG0087,TIGR:TIGR03625 Ribosomal protein L3	0	0	0	0	0	0	0	0	2.7	0	0	0	0	0	0	0	0	0	0	0	0	0	0	0
CLST074903 COG:COG2160,KEGG:K01804 L-arabinose isomerase	0	2.4	0	0	0	0	0	0	0	0	0	0	0	0	0	0	0	0	2.7	1.8	0	0	0	0
CLST075408 hypothetical protein	0	0	2	0	0	0	0	0	0	0	0	0	0	1.1	14.4	11.2	0	2.1	0	0	0	0	0	0
CLST075477 TIGR:TIGR01843,TIGR:TIGR00999,NOG:NOG123764,KEGG:K03585,COG:COG0845 Protein involved in protein secretion	3.2	0	0	0	0	0	0	0	0	0	0	0	0	0	0	0	0	0	1.8	0	0	0	0	0
CLST075675 PFAM:PF07745.6,KEGG:K01224,COG:COG3867 Arabinogalactan endo-1,4-beta-galactosidase	0	0	0	0	0	0	0	0	0	0	0	0	0	0	0	0	2.3	0	0	0	0	0	0	0
CLST075718 COG:COG2273 Beta-glucanase/Beta-glucan synthetase	0	0	0	0	0	0	0	0	0	0	0	0	0	1.1	0	0	0	0	0	0	0	0	0	0
CLST075729 KEGG:K02990,PFAM:PF01250.10,COG:COG0360 Ribosomal protein S6	0	0	2	0	2.7	2.7	0	0	0	2.7	0	0	1	2.1	0	2	0	2.1	0.9	1.8	2.1	4.4	0	0
CLST075896 COG:COG1538,PFAM:PF02321.11 Outer membrane protein	4.2	1.2	0	0	0	0	0	0	0	0	0	0	1	0	5.2	6.1	0	0	0.9	0	0	0	0	0
CLST075947 hypothetical protein	0	0	0	0	0	0	0	0	0	0	0	0	0	3.2	0	0	0	0	0	0	4.2	2.2	0	0
CLST075994 KEGG:K01802,COG:COG0545,PFAM:PF01346.11 FKBP-type peptidyl-prolyl cis-trans isomerases 1	7.4	5.9	0	0	0	0	0	0	0	0	0	0	0	0	0	0	0	0	0	0.9	0	0	0	0
CLST076100 TIGR:TIGR00641,PFAM:PF01642.15,TIGR:TIGR00640,KEGG:K01847,COG:COG1884 Methylmalonyl-CoA mutase, N-terminal domain/subunit	0	2.4	16.4	12.4	0	0	0	0	0	0	0	0	0	0	0	0	0	0	13.5	10	0	0	0	2.7
CLST076163 KEGG:K00925,TIGR:TIGR00016,COG:COG0282 Acetate kinase	4.2	7.1	7.2	4.1	0	0	0	0	0	0	6.6	11.2	0	0	0	0	4.5	5.3	0	5.4	0	0	2.7	1.8
CLST076255 COG:COG0102,KEGG:K02871,TIGR:TIGR01066 Ribosomal protein L13	0	0	0	0	0	0	0	0	2.7	1.8	0	3.3	0	0	0	0	0	0	0	0	0	0	0	0
CLST076263 COG:COG0448,KEGG:K00975,TIGR:TIGR02091 ADP-glucose pyrophosphorylase	0	0	0	0	0	0	0	0	0	0	0	0	0	0	2.1	6.1	0	0	0	0	0	0	0	0
CLST076319 TIGR:TIGR00484,KEGG:K02355,COG:COG0480 Translation elongation factors (GTPases)	2.1	2.4	0	0	0	0	0	0	0	0	0	0	0	0	0	0	0	0	0	0	0	0	2.7	1.8
CLST076369 PFAM:PF00673.14,COG:COG0094,PFAM:PF00281.12,KEGG:K02931 Ribosomal protein L5	0	0	0	0	0	0	0	0	0	5.5	0	0	0	0	0	0	0	0	0	0	0	0	0	0
CLST076399 PFAM:PF07523.5,NOG:NOG73444 Annotation not available	2.1	0	0	0	0	0	0	0	0	0	0	0	0	0	0	0	5.6	4.2	0	0	0	0	0	0
CLST076536 NOG:NOG81375 Receptor	1.1	0	0	0	0	0	0	0	0	0	0	0	8	8.5	1	2	0	0	0	0	0	0	0	0
CLST076602 KEGG:K01808,COG:COG0698,TIGR:TIGR00689,TIGR:TIGR02133 Ribose 5-phosphate isomerase RpiB	0	0	0	0	0	0	0	0	1.8	0	0	0	0	0	0	0	0	0	0	0	0	0	0	0
CLST076624 KEGG:K00616,TIGR:TIGR00875,COG:COG0176,KEGG:K01636 Transaldolase	0	0	0	0	0	0	2	0	0	0	0	0	0	0	0	0	0	0	0	0	0	0	0	0
CLST076963 TIGR:TIGR01064,COG:COG0469,KEGG:K00873 Pyruvate kinase	0	0	0	0	0	0	0	0	0	0	0	0	0	0	0	0	0	0	0	0	0	0	0	0.9
CLST076977 hypothetical protein	0	0	0	0	0	0	0	0	0	0	0	0	3	2.1	2.1	3	0	0	0	0	0	0	0	0
CLST077039 NOG:NOG08358,PFAM:PF12225.1,KEGG:K03615,TIGR:TIGR01945,COG:COG4656 Methylenetetrahydrofolate reductase	3.2	3.5	0	0	4.5	2.7	0	0	0	0	11	6.7	2	0	0	0	0	0	5.4	9.1	0	0	1.8	1.8
CLST077086 COG:COG0203,TIGR:TIGR00059,KEGG:K02879 Ribosomal protein L17	1.1	0	0	0	0	0	0	0	0	0	0	0	0	0	0	0	0	0	0	0	0	0	0	0
CLST077511 NOG:NOG133738,NOG:NOG124709 Receptor	0	0	0	0	0	0	0	0	0	0	0	0	9	16	0	0	0	0	0	0	0	0	0	0
CLST077635 NOG:NOG118431 Endo-1,4-Beta-Xylanase	2.1	0	0	0	0	0	0	0	0	0	0	0	0	0	0	0	12.4	3.2	0	0	0	0	0	0
CLST077810 PFAM:PF07554.6,NOG:NOG10337 Protein involved in biological adhesion	0	0	0	0	4.5	1.8	0	0	10	9.2	0	0	0	0	0	0	0	3.2	0	0	0	0	9.9	8
CLST077828 NOG:NOG86717 Annotation not available	0	0	0	0	0	0	0	0	0	0	0	0	0	0	16.5	7.1	20.3	17.9	0	0	0	0	0	0
CLST077837 COG:COG0685,KEGG:K00297 5,10-methylenetetrahydrofolate reductase	6.4	3.5	0	0	1.8	0	0	0	0	0	0	0	0	0	0	0	0	0	3.6	4.5	0	0	2.7	3.6
CLST077857 NOG:NOG114810,NOG:NOG85156 Receptor	0	0	0	0	0	0	0	0	0	0	0	0	4	2.1	0	0	0	0	0	0	0	0	0	0
CLST077920 PFAM:PF01761.13,KEGG:K00005,COG:COG0371 Glycerol dehydrogenase and related enzymes	0	0	0	2.1	0	0	0	0	0	0	0	0	0	0	0	0	0	0	0	0	0	0	0	0
CLST078011 COG:COG2086,KEGG:K03521 Electron transfer flavoprotein, beta subunit	24.4	23.6	5.1	6.2	0	0	4	0	0.9	2.7	0	0	0	0	0	0	0	0	12.6	13.6	0	0	12.6	27.6
CLST078247 TIGR:TIGR01049,COG:COG0051,KEGG:K02946 Ribosomal protein S10	0	0	0	0	0	0	2	0	0	0	0	0	0	0	0	0	4.5	5.3	0	0	0	0	0	0
CLST078420 TIGR:TIGR02349,KEGG:K03686,COG:COG0484 DnaJ-class molecular chaperone with C-terminal Zn finger domain	0	0	0	0	0	0	0	0	0	0	0	0	0	0	0	2	0	0	0	0	0	0	0	0
CLST078505 NOG:NOG76711 Annotation not available	0	0	0	0	0	0	0	0	0	0	0	0	7	5.3	0	0	0	0	0	0	0	0	0	0
CLST078565 NOG:NOG126347 Annotation not available	0	0	0	0	0	0	0	0	0	0	0	0	9	6.4	0	0	0	0	0	0	0	0	0	0
CLST078597 TIGR:TIGR02521,NOG:NOG41185 Annotation not available	0	0	0	0	0	0	0	0	0	0	0	0	0	0	19.6	22.3	0	0	0	0	21.2	19.6	7.2	5.3
CLST078889 NOG:NOG73277 Endo-Beta-N-Acetylglucosaminidase	2.1	0	0	0	0	0	0	0	0	0	0	0	0	0	0	0	0	0	0	0	0	0	0	0
CLST078985 PFAM:PF07980.4,NOG:NOG118665 Annotation not available	0	0	0	2.1	0	0	0	0	0	0	0	0	0	0	0	3	3.4	6.3	0	0	4.2	7.6	0	0
CLST079087 COG:COG0244,KEGG:K02864,PFAM:PF00466.13 Ribosomal protein L10	5.3	9.4	0	0	0	5.4	0	0	0	2.7	0	5.6	6	16	6.2	0	0	0	10.8	0	0	5.4	9	0
CLST079426 hypothetical protein	0	0	0	0	0	0	0	0	0	0	0	0	8	10.7	0	0	0	0	0	0	0	0	0	0
CLST079592 COG:COG0800,KEGG:K01625,TIGR:TIGR01182 2-keto-3-deoxy-6-phosphogluconate aldolase	0	0	0	0	0	0	0	0	2.7	2.7	0	0	0	0	0	0	0	0	0	0	0	0	0	0
CLST079689 PFAM:PF08485.3,TIGR:TIGR03589,KEGG:K01784,COG:COG1086,KEGG:K01795,PFAM:PF02719.8 Predicted nucleoside-diphosphate sugar epimerases	0	0	0	0	0	0	0	0	0	0	0	0	0	0	0	0	0	0	0	0	0	0	2.7	1.8
CLST079910 COG:COG1344,KEGG:K02406,PFAM:PF00700.14 Flagellin and related hook-associated proteins	18	30.7	0	0	0	0	0	0	0	0	0	0	0	0	0	0	0	0	0	0	0	0	0	0
CLST079969 hypothetical protein	0	0	0	0	0	0	0	0	0	0	0	0	0	0	0	6.1	0	0	0	0	0	0	0	0
CLST080352 NOG:NOG79278,NOG:NOG113320,NOG:NOG114220 Receptor	0	0	0	0	0	0	0	0	0	0	0	0	0	0	13.4	14.2	1.1	2.1	0	0	0	0	0	0
CLST080378 TIGR:TIGR01079,COG:COG0198,KEGG:K02895 Ribosomal protein L24	2.1	4.7	0	0	0	0	0	0	2.7	0	0	0	9	8.5	0	0	2.3	3.2	0	0	4.2	4.4	0	0
CLST080570 KEGG:K00939,TIGR:TIGR01351,COG:COG0563 Adenylate kinase and related kinases	1.1	0	6.1	8.2	2.7	1.8	0	0	1.8	0	0	0	0	0	0	0	0	0	0	0	0	0	0	0
CLST080743 hypothetical protein	2.1	5.9	0	0	0	0	0	0	0	0	0	0	0	0	0	0	0	0	0	0	6.3	5.4	7.2	5.3
CLST081014 COG:COG0459,KEGG:K04077,TIGR:TIGR02348 Chaperonin GroEL (HSP60 family)	4.2	5.9	42	36	0	0	6	7.9	0	0	16.4	22.3	0	1.1	0	0	0	5.3	7.2	4.5	0	0	34.1	27.6
CLST081095 NOG:NOG85887 Receptor	0	0	0	0	0	0	0	0	0	0	0	0	0	0	0	0	1.1	0	0	0	0	0	0	0
CLST081275 KEGG:K03340,TIGR:TIGR01921,NOG:NOG27533 Dehydrogenase	0	0	0	0	0	0	0	0	0	0	0	0	0	0	0	2	0	0	0	0	0	2.2	0	0
CLST081444 KEGG:K00584,COG:COG1962,TIGR:TIGR01114 Tetrahydromethanopterin S-methyltransferase, subunit H	0	0	0	0	0	0	0	0	0	0	0	0	0	0	0	0	0	0	0	0	0	0	1.8	1.8
CLST081459 NOG:NOG129439 Tonb-Dependent protein	4.2	2.4	0	0	0	0	0	0	0	0	0	0	6	6.4	0	0	0	0	0	0	0	0	0	0
CLST081585 TIGR:TIGR02632,TIGR:TIGR01830,TIGR:TIGR02685,TIGR:TIGR01963,KEGG:K00068,TIGR:TIGR01832,COG:COG1028 Dehydrogenases with different specificities (related to short-chain alcohol dehydrogenases)	0	0	0	0	3.6	4.5	0	0	0	0	0	0	0	0	0	0	0	0	0	0	0	0	0	0
CLST081680 NOG:NOG133738,NOG:NOG125607,NOG:NOG85156,NOG:NOG125726 Receptor	0	0	0	0	0	0	0	0	0	0	0	0	2	2.1	0	0	0	0	0	0	0	0	0	0.9
CLST081998 PFAM:PF02810.8,KEGG:K03070,PFAM:PF07516.6,TIGR:TIGR00963,COG:COG0653 Preprotein translocase subunit SecA (ATPase, RNA helicase)	0	0	0	0	0	0	0	0	0	0	0	0	0	0	0	0	0	0	0	0	0	0	0.9	0
CLST082099 KEGG:K03286,COG:COG2885 Outer membrane protein and related peptidoglycan-associated (lipo)proteins	19.1	24.8	0	0	0	0	0	0	0	0	0	0	0	0	7.2	9.1	0	0	17.1	10	3.2	3.3	0.9	1.8
CLST082124 hypothetical protein	0	0	0	0	0	0	0	0	0	0	0	0	2	0	0	0	0	0	0	0	0	0	0	0
CLST082618 KEGG:K00262,PFAM:PF02812.11,COG:COG0334,PFAM:PF00208.14 Glutamate dehydrogenase/leucine dehydrogenase	0	2.4	4.1	0	2.7	2.7	1	2	0	0	0	1.1	0	0	4.1	0	0	0	0	0	0	0	0	0
CLST082879 NOG:NOG133096 Receptor	0	0	0	0	0	0	0	0	0	0	0	0	2	3.2	0	0	0	0	0	0	0	0	0	0
CLST082887 NOG:NOG69778 Annotation not available	0	0	0	0	0	0	0	0	0	0	0	0	20	13.9	0	0	6.8	2.1	0	0	0	0	0	0
CLST083001 KEGG:K02887,TIGR:TIGR01032,COG:COG0292 Ribosomal protein L20	0	0	0	0	0	0	0	0	0	0	0	0	0	0	0	0	0	0	0	4.5	0	0	0	0
CLST083060 KEGG:K03531,TIGR:TIGR00065,NOG:NOG147877,COG:COG0206 Cell-Division protein	4.2	1.2	1	2.1	1.8	3.6	0	0	0	0	3.3	0	0	0	0	0	0	0	0.9	2.7	0	0	0	0
CLST083151 hypothetical protein	25.5	35.4	0	0	0	0	0	0	0	0	0	0	0	0	0	0	0	0	0	0	0	0	0	0
CLST083381 NOG:NOG77793 Receptor	0	0	0	0	0	0	0	0	0	0	0	0	24	24.6	0	0	0	0	0	0	0	0	0	0
CLST083902 PFAM:PF01380.15,COG:COG2222 Predicted phosphosugar isomerases	0	0	0	0	0	0	0	0	0	0	0	0	0	0	0	0	0	0	0	0	0	0	0	2.7
CLST084278 hypothetical protein	0	0	0	0	0	0	0	0	0	0	0	0	0	0	0	0	0	0	0.9	0	0	0	0	0
CLST084447 KEGG:K01478,TIGR:TIGR01078,COG:COG2235 Arginine deiminase	0	0	0	0	0	0	0	2	1.8	5.5	0	0	0	0	0	0	0	3.2	0	0	0	0	0	0
CLST084657 NOG:NOG85156 Receptor	0	0	0	0	0	0	0	0	0	0	0	0	3	2.1	0	0	0	0	0	0	0	0	0	0
CLST084872 TIGR:TIGR01857,KEGG:K01952,COG:COG0047,COG:COG0046 Phosphoribosylformylglycinamidine (FGAM) synthase, synthetase domain	5.3	3.5	0	0	0	0	3	0	0	0	0	0	0	0	0	0	0	0	0	0	0	0	0	0
CLST084921 KEGG:K00266,COG:COG0493,TIGR:TIGR01316 NADPH-dependent glutamate synthase beta chain and related oxidoreductases	0	0	0	0	0	0	3	0	0	0	0	0	0	0	0	0	0	0	0	0	0	0	0	0
CLST084963 NOG:NOG85428,KEGG:K11934 Annotation not available	0	0	4.1	2.1	0	0	0	0	0	0	0	0	0	0	0	0	11.3	11.6	0	0	5.3	6.5	0	0
CLST084968 hypothetical protein	0	0	0	0	0	0	0	0	0	0	0	0	0	2.1	0	0	0	0	0	0	0	0	0	0
CLST085169 hypothetical protein	0	0	0	0	0	0	0	0	0	0	0	0	0	0	0	0	0	0	1.8	0	0	0	0	0
CLST085514 hypothetical protein	0	0	0	0	0	0	0	0	0	0	0	0	0	0	0	0	0	0	0	0	0	0	0.9	0
CLST085602 NOG:NOG85474 Annotation not available	0	0	0	0	0	0	0	0	0	0	0	0	4	6.4	0	0	0	0	0	0	0	0	0	0
CLST085621 KEGG:K02994,COG:COG0096,PFAM:PF00410.12 Ribosomal protein S8	3.2	0	0	0	0	0	0	0	0	0	0	3.3	0	0	0	0	0	0	7.2	4.5	0	0	0	0
CLST085762 PFAM:PF06135.5,COG:COG4472 Uncharacterized protein conserved in bacteria	0	2.4	2	0	1.8	2.7	0	2	0.9	0	0	3.3	2	6.4	0	0	0	0	0	0	0	0	0	0
CLST085794 KEGG:K02992,TIGR:TIGR01029,COG:COG0049 Ribosomal protein S7	0	0	6.1	4.1	0	0	0	1	0	0	7.7	14.5	0	0	0	0	0	0	0.9	1.8	0	0	11.7	11.6
CLST085836 NOG:NOG113320 Receptor	0	0	0	0	0	0	0	0	0	0	0	0	2	3.2	0	0	0	0	0	0	0	0	0	0
CLST085987 COG:COG0205,TIGR:TIGR02482,KEGG:K00850 6-phosphofructokinase	0	0	0	0	1.8	0	0	0	0	0	0	0	0	0	0	0	0	0	0	0	0	0	0	0
CLST086005 NOG:NOG47831 Annotation not available	0	0	0	0	0	0	0	0	0	0	0	0	0	0	0	0	0	0	0	0	2.1	0	0	0
CLST086074 TIGR:TIGR03850 bind_CPR_0540: carbohydrate ABC transporter substrate-binding protein, CPR_0540 family	30.8	50.8	14.3	12.4	0	0	0	0	0	0	0	0	0	0	0	0	0	0	1.8	8.2	0	0	0	0
CLST086114 KEGG:K02990,PFAM:PF01250.10,COG:COG0360 Ribosomal protein S6	0	0	0	0	0	0	8.1	8.9	9.1	13.7	8.8	5.6	0	0	5.2	6.1	2.3	0	0	0	3.2	0	0	0
CLST086146 hypothetical protein	0	0	2	0	0	0	0	0	0	0	0	0	0	0	0	0	0	0	0	0	0	0	0	0
CLST086163 PFAM:PF07715.8,NOG:NOG148246 Receptor	0	0	0	0	0	0	0	0	0	0	0	0	0	0	0	0	0	1.1	0	0	0	0	0	0
CLST086306 KEGG:K00088,TIGR:TIGR01302,COG:COG0516 IMP dehydrogenase/GMP reductase	1.1	1.2	0	0	0	0	0	0	0	0	0	0	0	0	0	0	0	0	0	0	0	0	0	0
CLST086482 hypothetical protein	0	0	0	0	0	1.8	0	0	0	0	0	0	0	0	0	0	0	0	0	0	0	0	0	0
CLST086611 PFAM:PF08522.3,NOG:NOG43479 Annotation not available	0	2.4	0	0	0	0	0	0	0	0	0	0	0	0	0	0	0	0	0	0	0	0	0	0
CLST086838 TIGR:TIGR00484,KEGG:K02355,COG:COG0480 Translation elongation factors (GTPases)	0	0	22.5	14.4	2.7	2.7	3	1	0	0	14.3	14.5	0	0	0	0	3.4	2.1	9	12.7	0	0	5.4	2.7
CLST086942 hypothetical protein	0	0	0	0	0	0	0	0	0.9	0	0	0	0	0	0	0	0	0	0	0	0	0	0	0
CLST087190 NOG:NOG121565 Annotation not available	0	0	0	0	0	0	0	0	0	0	0	0	0	6.4	0	0	0	0	0	0	0	0	0	0
CLST087290 hypothetical protein	0	0	0	1	0	0	0	0	0	0	0	0	0	0	0	0	0	0	0	0	0	0	0	0
CLST087322 NOG:NOG77793 Receptor	0	0	0	0	0	0	0	0	0	0	0	0	0	1.1	0	0	0	0	0	0	0	0	0	0
CLST087459 COG:COG4206 Outer membrane cobalamin receptor protein	0	0	0	0	0	0	0	0	0	0	0	0	2	2.1	0	0	0	0	0	0	0	0	0	0
CLST087833 KEGG:K01880,COG:COG0423,TIGR:TIGR00389 Glycyl-tRNA synthetase (class II)	4.2	0	0	0	0	0	0	0	0	0	0	0	0	0	0	0	0	0	1.8	1.8	0	0	0.9	0.9
CLST087974 COG:COG1847,PFAM:PF01424.15,KEGG:K06346 Predicted RNA-binding protein	0	0	2	5.1	0	0	0	0	0	0	0	1.1	0	0	0	0	0	0	0	0	0	0	0	0
CLST088011 PFAM:PF01230.16,KEGG:K02503,COG:COG0537 Diadenosine tetraphosphate (Ap4A) hydrolase and other HIT family hydrolases	0	0	0	0	0	0	0	0	0	0	0	0	0	0	0	0	0	0	0	0	0	0	0.9	0
CLST088098 COG:COG0326,KEGG:K04079 Molecular chaperone, HSP90 family	1.1	0	0	0	0	0	0	0	0	0	0	0	0	0	0	0	0	0	0	0	0	0	0	0
CLST088210 hypothetical protein	0	0	0	0	5.4	5.4	0	0	0	0	0	0	0	0	0	0	0	0	4.5	0	0	0	0	0
CLST088249 NOG:NOG124709,NOG:NOG85156 Receptor	12.7	7.1	35.9	43.2	0	0	0	0	0	0	0	0	0	0	4.1	4.1	0	0	0	0	0	0	0	3.6
CLST088312 PFAM:PF00120.17,COG:COG3968,PFAM:PF12437.1,KEGG:K01915 Uncharacterized protein related to glutamine synthetase	7.4	7.1	0	0	0	0	0	0	0	0	0	0	0	0	0	0	0	0	1.8	0.9	0	0	0	0
CLST088799 PFAM:PF05544.4,COG:COG3938,KEGG:K01777 Proline racemase	0	0	0	0	0	0	0	0	0	0	0	0	6	0	0	0	0	0	0	0	0	0	0	0
CLST088836 hypothetical protein	0	0	0	0	0	0.9	0	0	0	0	0	0	0	0	0	0	0	0	0	0	0	0	0	0
CLST089019 hypothetical protein	0	1.2	0	0	0	0	0	0	0	0	0	0	0	0	0	0	0	0	0	0	0	0	0	0
CLST089058 KEGG:K10670,PFAM:PF09338.4,NOG:NOG43946 Reductase	8.5	16.5	1	0	0	0	7.1	3	0	0	3.3	0	5	0	0	3	3.4	1.1	1.8	1.8	0	0	0	0
CLST089155 hypothetical protein	0	0	0	0	0	0	0	0	0	0	0	0	0	0	0	0	0	0	0	0	0	0	0	0.9
CLST089289 COG:COG0492,TIGR:TIGR01292,KEGG:K00384,TIGR:TIGR03143 Thioredoxin reductase	0	0	0	0	0	0	0	0	0	0	0	0	0	0	4.1	0	0	0	0	0	0	0	0.9	0.9
CLST089484 TIGR:TIGR02203,KEGG:K06147,COG:COG1132 ABC-type multidrug transport system, ATPase and permease components	2.1	0	0	0	0	0	0	0	0	0	0	0	0	0	0	0	0	0	0	0	0	0	0	0
CLST089512 hypothetical protein	0	0	0	0	0	0	0	0	0	0	0	0	0	1.1	0	0	0	0	0	0	0	0	0	0
CLST089684 NOG:NOG76717 Annotation not available	0	0	0	2.1	0	0	0	0	0	0	0	0	2	0	0	0	0	0	0	0	0	0	0	0
CLST089960 COG:COG0246,KEGG:K00041 Mannitol-1-phosphate/altronate dehydrogenases	0	0	0	0	0	0	0	0	5.5	2.7	0	0	0	0	0	0	0	0	0	0	0	0	0	0
CLST090309 hypothetical protein	0	0	0	0	0	0	0	0	0	0	0	0	0	2.1	0	0	0	0	0	0	0	0	0	0
CLST090576 NOG:NOG40992 Annotation not available	0	0	0	0	0	0	0	0	0	0	0	0	0	2.1	0	0	0	0	0	0	0	0	0	0
CLST090595 COG:COG0264,KEGG:K02357,TIGR:TIGR00116 Translation elongation factor Ts	0	0	0	0	0	0	0	0	0	1.8	0	0	0	0	0	0	0	0	0	0	0	0	0	0
CLST091129 KEGG:K01710,TIGR:TIGR01181,COG:COG1088 dTDP-D-glucose 4,6-dehydratase	4.2	0	0	0	0	0	0	0	0	0	0	0	0	0	0	0	0	0	0	0	0	0	0	0
CLST092065 NOG:NOG78068 Receptor	10.6	10.6	0	0	0	0	0	0	0	0	0	0	0	2.1	0	0	0	0	0	0	0	0	0	0
CLST092226 KEGG:K03413,PFAM:PF00072.17,COG:COG0784 FOG: CheY-like receiver	2.1	0	0	0	0	0	0	0	0	0	0	0	0	0	0	0	0	0	0	1.8	0	0	0	0
CLST092296 COG:COG0743,KEGG:K00099,TIGR:TIGR00243 1-deoxy-D-xylulose 5-phosphate reductoisomerase	5.3	5.9	0	3.1	0	0	0	0	0	0	0	0	0	0	0	0	0	0	0	0	0	0	0	0
CLST092489 COG:COG0656,KEGG:K05885,KEGG:K00540 Aldo/keto reductases, related to diketogulonate reductase	0	0	5.1	4.1	0	0	0	0	0	0	0	0	0	0	0	0	0	0	0	0	0	0	0	0
CLST092497 hypothetical protein	2.1	3.5	32.8	20.6	0	0	0	0	0	0	0	0	0	0	8.2	8.1	0	0	0	0	0	0	1.8	4.4
CLST092629 KEGG:K10670,TIGR:TIGR01918,NOG:NOG42972,PFAM:PF07355.5 Glycine reductase	7.4	3.5	0	0	0	0	0	0	0	0	0	0	6	5.3	0	0	0	0	0.9	0	0	0	0	0
CLST092658 COG:COG0448,KEGG:K00975,PFAM:PF00483.16,TIGR:TIGR02091 ADP-glucose pyrophosphorylase	0	0	0	0	0	0	0	0	0	0	0	0	0	0	2.1	3	0	0	6.3	7.2	0	0	0	0
CLST092959 TIGR:TIGR00651,KEGG:K00625,COG:COG0280 Phosphotransacetylase	9.6	9.4	7.2	3.1	4.5	9.1	3	0	0	0	6.6	14.5	9	3.2	0	1	4.5	2.1	10.8	7.2	2.1	0	0	0
CLST093041 KEGG:K02794,COG:COG3444 Phosphotransferase system, mannose/fructose/N-acetylgalactosamine-specific component IIB	0	0	0	0	0	0	3	3	0	0	0	0	0	0	0	0	0	0	0	0	0	0	0	0
CLST093061 NOG:NOG08358,PFAM:PF12225.1 Methylenetetrahydrofolate reductase	0	0	0	0	0	0	0	0	0	0	0	2.2	0	0	0	0	0	0	0	0	0	0	0	0
CLST093228 KEGG:K10254,PFAM:PF06100.4,COG:COG4716 Myosin-crossreactive antigen	1.1	0	0	0	0	0	0	0	0	0	0	0	0	0	0	0	0	0	0	0	0	0	0	0
CLST093715 NOG:NOG12793,NOG:NOG114620 Receptor	7.4	10.6	0	3.1	0	0	0	0	0	0	0	0	6	6.4	0	0	0	0	0	0	0	0	0	0
CLST094321 PFAM:PF05816.4,COG:COG3853 Uncharacterized protein involved in tellurite resistance	0	0	0	0	0	0	0	0	0	0	0	2.2	0	0	0	0	0	0	0	0	0	0	0	0
CLST094391 KEGG:K02956,TIGR:TIGR00952,COG:COG0184 Ribosomal protein S15P/S13E	0	0	0	0	0	0	0	0	0	0	0	2.2	0	0	0	0	0	0	2.7	0	0	0	3.6	2.7
CLST094605 TIGR:TIGR00651,KEGG:K00625,COG:COG0280 Phosphotransacetylase	3.2	4.7	7.2	12.4	0	1.8	0	0	0	0	0	0	0	0	0	0	0	0	1.8	0	0	0	0	0
CLST094866 KEGG:K01876,TIGR:TIGR00459,COG:COG0173 Aspartyl-tRNA synthetase	1.1	0	7.2	4.1	0	0	0	0	0	0	0	0	0	0	0	0	2.3	1.1	0	0	0	0	0	0
CLST094907 hypothetical protein	8.5	8.3	0	0	0	0	0	0	0	0	0	0	3	2.1	0	0	0	0	0	0	0	0	0	0
CLST095084 TIGR:TIGR02176,KEGG:K03737,COG:COG1013 Pyruvate:ferredoxin oxidoreductase and related 2-oxoacid:ferredoxin oxidoreductases, beta subunit	0	0	0	0	0.9	1.8	0	0	0	0	0	0	0	0	0	0	0	0	0	0	0	0	0	0
CLST095087 hypothetical protein	0	0	0	0	0	0	0	0	0	0	0	0	0	0	0	0	0	0	0	0.9	0	0	0	0
CLST095250 COG:COG1493,TIGR:TIGR00744,KEGG:K06023,TIGR:TIGR00679,PFAM:PF02603.9 Serine kinase of the HPr protein, regulates carbohydrate metabolism	0	0	0	0	0	0	0	0	0	0	2.2	0	0	0	0	0	0	0	0	0	5.3	3.3	0	0
CLST095697 NOG:NOG71396 Annotation not available	2.1	3.5	0	0	0	0	0	0	0	0	0	0	0	0	0	0	0	0	0	0	0	0	0	0
CLST095757 KEGG:K10672,NOG:NOG45316 Reductase complex	6.4	0	0	0	0	0	2	0	0	1.8	0	0	0	0	0	0	0	0	1.8	2.7	0	0	0	0
CLST095838 PFAM:PF08522.3,NOG:NOG43479 Annotation not available	0	0	2	0	0	0	0	0	0	0	0	0	0	0	0	0	0	0	0	0	0	0	0	0
CLST095906 PFAM:PF00673.14,COG:COG0094,PFAM:PF00281.12,KEGG:K02931 Ribosomal protein L5	2.1	0	0	0	0	0	0	0	0	0	0	0	0	0	0	0	0	0	0	0	0	0	8.1	8
CLST096130 COG:COG1493,KEGG:K06023,TIGR:TIGR00679,PFAM:PF02603.9,PFAM:PF07475.5 Serine kinase of the HPr protein, regulates carbohydrate metabolism	0	0	0	0	0	0	0	0	0	0	3.3	0	0	0	0	0	0	0	0	0	0	0	0	0
CLST096170 TIGR:TIGR00456,KEGG:K01887,COG:COG0018 Arginyl-tRNA synthetase	0	0	0	0	0	0	0	0	0	0	0	2.2	0	0	0	0	0	0	0	0	0	0	0	0
CLST096588 KEGG:K01815,COG:COG3717 5-keto 4-deoxyuronate isomerase	3.2	0	0	0	0	0	0	0	0	0	0	0	0	0	0	0	0	0	0	0	0	0	0	0
CLST096597 TIGR:TIGR01857,KEGG:K01952,COG:COG0047 Phosphoribosylformylglycinamidine (FGAM) synthase, glutamine amidotransferase domain	0	0	0	0	0	0	0	0	0	0	0	0	0	0	0	0	0	0	0.9	0	0	0	0	0
CLST096714 NOG:NOG69778 Annotation not available	0	0	0	0	0	0	0	0	0	0	0	0	4	3.2	0	0	0	0	0	0	0	0	0	0
CLST096776 TIGR:TIGR01235,COG:COG5016,TIGR:TIGR02712,KEGG:K01960,KEGG:K01571,COG:COG0511 Biotin carboxyl carrier protein	0	0	0	0	0	0	3	0	0	0	4.4	4.5	0	0	0	0	0	0	0	0	0	0	0	0
CLST096855 COG:COG2502,KEGG:K01914,PFAM:PF03590.8,TIGR:TIGR00669 Asparagine synthetase A	0	0	0	0	0	0	0	0	0	0	0	2.2	0	0	0	0	0	0	0	0	0	0	0	0
CLST096988 hypothetical protein	0	0	0	0	0.9	0.9	1	0	0	0	0	0	0	0	0	0	0	0	0	0	0	0	0	0
CLST097028 hypothetical protein	0	0	0	0	0	0	0	0	0	0	0	0	0	0	0	0	0	0	0	2.7	0	0	0	0
CLST097162 NOG:NOG121776,TIGR:TIGR02037,COG:COG0265,KEGG:K01362 Serine protease	3.2	0	2	0	0	0	0	0	0	0	0	0	0	0	0	0	0	0	0	0	0	0	0	0
CLST097236 PFAM:PF00165.16,COG:COG2207 AraC-type DNA-binding domain-containing proteins	0	0	1	0	0	0	0	0	0	0	0	0	0	0	0	0	0	0	0	0	0	0	0	0
CLST097589 TIGR:TIGR00705,PFAM:PF01343.11,KEGG:K04773,TIGR:TIGR00706,COG:COG0616 Periplasmic serine proteases (ClpP class)	0	0	0	0	0	0	0	0	0	0	0	0	0	0	0	2	0	0	0	0	0	0	0	0
CLST097676 COG:COG1924,TIGR:TIGR02259 Activator of 2-hydroxyglutaryl-CoA dehydratase (HSP70-class ATPase domain)	0	0	0	0	0	0	0	0	0	0	0	0	0	0	0	0	0	0	5.4	6.3	0	0	1.8	0
CLST097714 COG:COG1653,KEGG:K02027 ABC-type sugar transport system, periplasmic component	0	0	0	0	5.4	1.8	0	0	0	0	0	0	0	0	0	0	0	0	0	0	0	0	0	0
CLST098155 NOG:NOG85887,NOG:NOG122779 Receptor	6.4	1.2	0	0	0	0	0	0	0	0	0	0	0	4.3	0	0	0	0	0	0	0	0	0	0
CLST098262 NOG:NOG77793 Receptor	0	0	0	2.1	0	0	0	0	0	0	0	0	0	0	2.1	2	0	0	0	0	0	0	0	0
CLST098299 hypothetical protein	0	0	0	0	0	0	0	0	0	0	0	0	2	5.3	0	0	0	0	0	0	3.2	3.3	0	0
CLST098324 NOG:NOG85156 Receptor	2.1	3.5	0	0	0	0	0	0	0	0	0	0	0	0	0	0	0	0	0	0	0	0	0	0
CLST098622 PFAM:PF00465.12,KEGG:K00100,TIGR:TIGR02638,KEGG:K04072,COG:COG1454 Alcohol dehydrogenase, class IV	3.2	0	27.7	30.9	0	0	20.2	23.7	0	0	35.1	15.6	0	0	0	0	0	0	10.8	10.9	0	0	4.5	0
CLST098652 NOG:NOG133738,NOG:NOG118395,NOG:NOG78068 Receptor	0	0	0	0	0	0	0	0	0	0	0	0	0	0	0	2	0	0	0	0	0	0	0	0
CLST098763 hypothetical protein	0	0	0	0	0	0	0	0	0	0	0	0	4	3.2	0	0	0	0	0	0	0	0	0	0
CLST099607 hypothetical protein	0	2.4	0	0	0	0	0	0	0	0	0	0	3	4.3	3.1	2	4.5	0	1.8	0	0	0	0	0
CLST099616 KEGG:K02056,TIGR:TIGR02323,TIGR:TIGR01186,TIGR:TIGR03740,TIGR:TIGR03375,TIGR:TIGR01288,TIGR:TIGR03410,TIGR:TIGR03265,TIGR:TIGR00968,COG:COG3845,PFAM:PF00005.20,TIGR:TIGR02633 ABC-type uncharacterized transport systems, ATPase components	0	0	2	0	0	0	0	0	0	0	0	0	0	0	0	0	0	0	0	0	0	0	0	0
CLST099661 NOG:NOG86717 Annotation not available	0	0	0	0	0	0	0	0	0	0	0	0	2	8.5	0	0	0	0	2.7	2.7	0	0	0	0
CLST099714 NOG:NOG26186 Xylosidase	0	0	0	0	0	0	0	0	0	0	3.3	0	3	3.2	0	0	2.3	2.1	0	0	0	0	0	0
CLST099828 hypothetical protein	0	0	0	0	0	0.9	0	0	0	0	0	0	0	0	0	0	0	0	0	0	0	0	0	0
CLST099871 hypothetical protein	0	0	0	0	0	0	0	0	0	0	0	0	0	0	0	0	0	0	0	0	0	0	0	0.9
CLST100074 NOG:NOG120581 Annotation not available	0	0	0	0	0	0	0	0	0	0	0	0	0	0	0	0	0	0	0	0	0	0	41.2	29.4
CLST100313 COG:COG0098,KEGG:K02988,TIGR:TIGR01021 Ribosomal protein S5	0	0	2	0	0	0	0	0	0	0	4.4	2.2	0	0	0	0	0	0	11.7	8.2	0	0	8.1	5.3
CLST100314 hypothetical protein	0	0	0	0	0	0	0	0	0	0	0	0	0	0	0	1	0	0	0	0	0	0	0	0
CLST100611 hypothetical protein	0	0	0	0	0	0	0	0	0.9	0	0	0	0	0	0	0	0	0	0	0	0	0	0	0
CLST100890 hypothetical protein	0	0	0	0	0	0	0	0	0	0	0	0	0	1.1	0	0	0	0	0	0	0	0	0	0
CLST100891 COG:COG4822,KEGG:K02190,PFAM:PF06180.4 Cobalamin biosynthesis protein CbiK, Co2+ chelatase	0	0	0	0	0	0	0	0	0	2.7	2.2	0	0	0	0	0	0	0	0	0	0	0	0	0
CLST101387 TIGR:TIGR00032,KEGG:K01940,COG:COG0137 Argininosuccinate synthase	0	0	0	3.1	0	0	0	2	0	0	2.2	0	0	0	0	0	0	0	3.6	6.3	0	0	23.3	16.9
CLST101424 COG:COG2508,KEGG:K02647 Regulator of polyketide synthase expression	3.2	3.5	1	0	1.8	0	0	0	0	0	0	0	0	0	5.2	1	0	0	0	0	0	0	0	0
CLST101528 KEGG:K02876,COG:COG0200,TIGR:TIGR01071 Ribosomal protein L15	0	0	0	0	0.9	0	0	0	0	0	0	1.1	2	6.4	0	2	2.3	0	2.7	3.6	2.1	0	0	0
CLST101734 TIGR:TIGR01830,TIGR:TIGR01963,TIGR:TIGR02415,TIGR:TIGR01832,COG:COG1028 Dehydrogenases with different specificities (related to short-chain alcohol dehydrogenases)	10.6	5.9	0	0	0	0	0	0	0	0	0	0	0	0	0	0	0	0	0	0	0	0	0	0
CLST101781 COG:COG0448,KEGG:K00975,TIGR:TIGR02092,TIGR:TIGR02091 ADP-glucose pyrophosphorylase	0	2.4	7.2	4.1	0	0	0	0	0	0	0	0	0	2.1	0	0	0	0	0	0	0	0	0	0
CLST101932 COG:COG0363,KEGG:K02564,TIGR:TIGR00502 6-phosphogluconolactonase/Glucosamine-6-phosphate isomerase/deaminase	0	0	0	0	0	0	0	0	0	0	0	0	0	0	0	0	0	0	1.8	0	0	0	2.7	0
CLST102026 KEGG:K06959,PFAM:PF09371.3,TIGR:TIGR00717,PFAM:PF00575.16,COG:COG2183,TIGR:TIGR03591 Transcriptional accessory protein	2.1	0	0	0	0	0	0	0	0	0	0	0	0	0	0	0	0	0	0	0	0	0	0	0
CLST102185 TIGR:TIGR00060,COG:COG0256,KEGG:K02881 Ribosomal protein L18	0	0	0	0	0	0	4	2	0	0	0	0	0	0	0	0	0	0	0	0	0	0	0	0
CLST102743 COG:COG0686,KEGG:K00259,TIGR:TIGR00518 Alanine dehydrogenase	4.2	2.4	0	0	0	0	0	0	0	0	0	3.3	5	4.3	5.2	3	0	0	0	0	4.2	3.3	0	0
CLST103021 COG:COG3640,KEGG:K07321 CO dehydrogenase maturation factor	0	0	0	0	2.7	0	0	0	0	0	0	0	0	0	0	0	0	0	0	0	0	0	0	0
CLST103312 NOG:NOG12793 Calcium ion binding protein	0	0	0	0	0	0	0	0	0	0	0	0	0	0	2.1	0	0	0	0	0	0	0	2.7	0
CLST103393 NOG:NOG113320,NOG:NOG79278 Receptor	0	0	0	0	0	0	0	0	0	0	0	0	17	21.4	0	0	0	0	6.3	4.5	0	0	0	0
CLST103774 NOG:NOG113320 Receptor	0	3.5	0	0	0	0	0	0	0	0	0	0	0	0	0	0	0	0	0	0	0	0	0	0
CLST103887 COG:COG3444,TIGR:TIGR00854,KEGG:K02745 Phosphotransferase system, mannose/fructose/N-acetylgalactosamine-specific component IIB	0	0	0	0	0.9	0	0	0	0	0	0	0	0	0	0	0	0	0	0	0	0	0	0	0
CLST103979 COG:COG1472,KEGG:K01188 Beta-glucosidase-related glycosidases	0	0	0	1	0	0	0	0	0	0	0	0	2	0	0	0	0	0	0	0	0	0	0	0
CLST104007 hypothetical protein	0	0	0	0	0	0	0	0	0	0	0	0	0	5.3	0	0	0	0	0	0	0	0	0	0
CLST104114 hypothetical protein	0	0	0	0	0	0	0	0	0	0	0	0	38	39.5	20.6	24.4	0	0	3.6	6.3	0	0	4.5	3.6
CLST104184 hypothetical protein	12.7	8.3	3.1	2.1	0	0	0	0	0	0	0	0	2	0	0	0	4.5	3.2	0	1.8	0	0	0	0
CLST104330 TIGR:TIGR02632,TIGR:TIGR01830,TIGR:TIGR01963,KEGG:K00046,TIGR:TIGR01832,TIGR:TIGR02415,COG:COG1028 Dehydrogenases with different specificities (related to short-chain alcohol dehydrogenases)	2.1	1.2	0	0	0	0	0	0	0	0	0	0	0	0	0	0	0	0	0	0	0	0	0	0
CLST104556 hypothetical protein	0	0	0	0	0	0	0	0	0	0	0	0	0	0	0	0	3.4	2.1	0	0	0	0	0	0
CLST105138 PFAM:PF03764.11,PFAM:PF00679.17,TIGR:TIGR00484,KEGG:K02355,COG:COG0480,TIGR:TIGR00490 Translation elongation factors (GTPases)	5.3	3.5	3.1	0	7.2	10.9	3	2	0.9	0.9	6.6	8.9	9	7.5	0	2	5.6	3.2	3.6	4.5	0	0	1.8	0.9
CLST105181 NOG:NOG84426 Annotation not available	0	0	0	0	0	0	0	0	0	0	0	0	7	12.8	3.1	0	0	0	0	0	6.3	6.5	0	0
CLST105239 KEGG:K02906,COG:COG0087,TIGR:TIGR03625 Ribosomal protein L3	0	0	0	0	0	0	0	0	0	0	0	0	0	0	0	0	0	0	0.9	0	0	0	0	0
CLST105401 COG:COG1501,PFAM:PF01055.19,KEGG:K01811 Alpha-glucosidases, family 31 of glycosyl hydrolases	4.2	0	0	0	0	0	0	0	0	0	0	0	0	0	4.1	4.1	0	0	2.7	4.5	0	0	0	0
CLST105474 COG:COG0080,TIGR:TIGR01632,KEGG:K02867 Ribosomal protein L11	0	0	0	0	0	0	0	0	0	0	0	0	0	0	0	0	0	0	1.8	2.7	0	0	0	0
CLST105589 PFAM:PF00831.16,KEGG:K02904,COG:COG0255 Ribosomal protein L29	0	0	0	0	0	0	0	0	0	0	0	1.1	0	0	0	0	0	0	0	0	0	0	0	0
CLST105667 TIGR:TIGR00422,KEGG:K01873,COG:COG0525,PFAM:PF10458.2 Valyl-tRNA synthetase	0	2.4	0	0	0	0	0	0	0	0	0	0	0	0	0	0	0	0	0	0	0	0	0	0
CLST105683 TIGR:TIGR02487,KEGG:K00527,PFAM:PF03477.9 NrdD: anaerobic ribonucleoside-triphosphate reductase	0	0	5.1	3.1	0	0	0	0	0	0	0	0	0	0	0	0	0	0	0	0	0	0	0	0
CLST105804 KEGG:K10117,COG:COG1653 ABC-type sugar transport system, periplasmic component	0	0	0	0	0	0	0	0	0	0	0	0	0	0	0	0	2.3	3.2	0	0	0	0	0	0
CLST105937 TIGR:TIGR02095,COG:COG0297,KEGG:K00703 Glycogen synthase	0	0	0	0	0.9	0	0	0	0	0	0	0	0	0	0	0	0	0	0	0	0	0	0	0
CLST105965 KEGG:K04043,COG:COG0443,TIGR:TIGR02350 Molecular chaperone	0	0	0	0	0	0	8.1	5.9	0	0	0	3.3	0	0	0	0	2.3	4.2	0	0	0	0	0	0
CLST105980 KEGG:K01868,TIGR:TIGR00418,COG:COG0441 Threonyl-tRNA synthetase	0	0	0	4.1	0	0	0	0	0	0	0	0	0	0	0	0	0	0	0	0	0	0	0	0
CLST106042 TIGR:TIGR01203,COG:COG0634,KEGG:K00760 Hypoxanthine-guanine phosphoribosyltransferase	0	0	0	0	0	0	0	0	0	0	0	0	0	0	0	0	0	0	0	0	0	0	0	1.8
CLST106080 TIGR:TIGR02104,COG:COG1523,COG:COG0366,KEGG:K01200 Type II secretory pathway, pullulanase PulA and related glycosidases	4.2	3.5	2	3.1	0	0	0	0	0	0	0	0	0	0	0	0	28.2	30.6	0	0	0	0	0	0
CLST106236 KEGG:K05808,COG:COG1544 Ribosome-associated protein Y (PSrp-1)	0	0	0	0	0	0	3	4	7.3	3.7	0	0	0	0	0	0	0	0	0	0	0	0	0	0
CLST106295 COG:COG0088,KEGG:K02926,PFAM:PF00573.15 Ribosomal protein L4	8.5	11.8	0	0	0	0	3	0	2.7	3.7	0	0	0	0	0	0	0	0	11.7	10.9	0	0	8.1	8
CLST106456 TIGR:TIGR03635,KEGG:K02961,COG:COG0186 Ribosomal protein S17	0	4.7	0	0	0	0	2	2	0	0	0	0	0	0	0	0	0	0	1.8	1.8	0	0	2.7	2.7
CLST106726 PFAM:PF00673.14,COG:COG0094,PFAM:PF00281.12,KEGG:K02931 Ribosomal protein L5	11.7	5.9	0	0	0	0	0	0	3.7	2.7	0	0	0	0	0	0	0	0	3.6	3.6	0	0	1.8	4.4
CLST106774 PFAM:PF10385.2,PFAM:PF04565.9,KEGG:K03043,TIGR:TIGR02013,COG:COG0085 DNA-directed RNA polymerase, beta subunit/140 kD subunit	0	0	0	0	0	0	0	0	0.9	0	0	0	0	0	0	0	0	0	0	0	0	0	0	0
CLST106928 hypothetical protein	2.1	0	0	0	0	0	0	0	0	0	0	0	0	0	0	0	0	0	0	0	0	0	0	0
CLST106958 COG:COG0244,KEGG:K02864,PFAM:PF00466.13 Ribosomal protein L10	0	0	0	0	0	0	0	0	1.8	2.7	0	0	0	0	0	0	0	0	0	0	0	0	0	0
CLST107329 TIGR:TIGR00169,COG:COG0473,KEGG:K00052 Isocitrate/isopropylmalate dehydrogenase	0	0	0	0	0	0	0	0	0	0	0	0	0	0	0	0	0	0	0	5.4	0	0	0	0
CLST107393 hypothetical protein	0	0	0	0	0	0	0	0	0	3.7	0	0	0	0	0	0	0	0	0	0	0	0	0	0
CLST107403 COG:COG1472,KEGG:K05349,PFAM:PF00933.14 Beta-glucosidase-related glycosidases	2.1	0	0	0	0	0	0	0	0	0	0	0	0	0	0	0	0	0	0	0	0	0	0	0
CLST107480 COG:COG1012,KEGG:K04021,PFAM:PF00171.15,TIGR:TIGR02518 NAD-dependent aldehyde dehydrogenases	5.3	0	0	0	0	0	0	0	2.7	3.7	4.4	5.6	2	3.2	0	2	0	0	0	0	0	2.2	0	0
CLST107527 COG:COG3968,PFAM:PF12437.1,KEGG:K01915 Uncharacterized protein related to glutamine synthetase	0	0	0	0	0	0	0	0	0	0	0	0	0	0	0	0	0	0	0.9	0.9	0	0	0	0
CLST107588 KEGG:K00616,TIGR:TIGR00875,COG:COG0176 Transaldolase	1.1	0	0	0	0	0	2	1	0	0	0	0	0	0	0	0	0	0	0	0	0	0	1.8	2.7
CLST107722 KEGG:K00533,COG:COG4624,TIGR:TIGR02512,PFAM:PF00037.20 Iron only hydrogenase large subunit, C-terminal domain	0	0	0	3.1	0	0	0	0	0	0	0	0	0	0	0	0	0	0	0	0	0	0	0	0
CLST107840 TIGR:TIGR01307,COG:COG0696,KEGG:K01834 Phosphoglyceromutase	2.1	3.5	0	0	0	0	0	0	0	0	0	0	0	0	0	0	0	0	0	0	0	0	1.8	2.7
CLST107843 hypothetical protein	0	2.4	0	0	1.8	4.5	0	0	0	0	0	0	0	3.2	0	0	0	0	4.5	4.5	0	0	2.7	1.8
CLST107960 TIGR:TIGR03405,TIGR:TIGR02638,KEGG:K04072,COG:COG1454 Alcohol dehydrogenase, class IV	0	0	0	0	0	0	0	0	0	0.9	0	0	0	0	0	0	0	0	0	0	0	0	0	0
CLST107973 hypothetical protein	0	0	0	0	0	0	0	0	0	0	2.2	0	0	0	0	0	0	0	0	0	0	0	0	0
CLST108141 KEGG:K00262,PFAM:PF02812.11,COG:COG0334,PFAM:PF00208.14 Glutamate dehydrogenase/leucine dehydrogenase	1.1	0	0	0	0	0	3	0	0	0.9	0	0	1	2.1	0	0	1.1	2.1	0	0	0	0	0	0
CLST108214 COG:COG0052,TIGR:TIGR01011,KEGG:K02967 Ribosomal protein S2	0	0	0	0	0	0	1	0	0	1.8	0	3.3	1	0	0	0	3.4	2.1	0	0	0	0	0	0.9
CLST108350 TIGR:TIGR03451,TIGR:TIGR02818,COG:COG1063,KEGG:K00060,TIGR:TIGR03201,TIGR:TIGR00692 Threonine dehydrogenase and related Zn-dependent dehydrogenases	7.4	3.5	0	0	0	0	0	0	0	0	0	0	2	0	0	0	0	0	1.8	0	0	0	0	0
CLST108699 NOG:NOG86857 Annotation not available	0	0	0	0	0	0	0	0	0	0	0	0	0	2.1	3.1	4.1	0	0	0	0	0	0	0	0
CLST108718 NOG:NOG140128 Annotation not available	1.1	3.5	0	3.1	1.8	1.8	0	0	2.7	2.7	2.2	0	0	0	0	0	0	0	2.7	2.7	3.2	0	0	0
CLST108852 PFAM:PF02614.7,KEGG:K01812,COG:COG1904 Glucuronate isomerase	0	0	0	0	0	0	0	0	0	0	0	0	0	0	0	1	0	0	0	0	0	3.3	0	0
CLST108925 COG:COG0205,TIGR:TIGR02478,TIGR:TIGR02482,KEGG:K00850,TIGR:TIGR02483 6-phosphofructokinase	3.2	2.4	0	0	0	0	2	0	0	0	0	0	0	0	0	0	0	0	0	0	0	0	0	0
CLST109104 KEGG:K01803,COG:COG0149,PFAM:PF00121.11 Triosephosphate isomerase	0	0	0	0	0	0	2	1	0	2.7	0	0	0	0	0	0	2.3	2.1	0	0	0	0	0	0
CLST109157 COG:COG1209,TIGR:TIGR01207,KEGG:K00973 dTDP-glucose pyrophosphorylase	0	0	0	2.1	0	0	0	0	0	0	0	0	0	0	0	0	0	0	0	0	0	0	0	0
CLST109305 NOG:NOG10616 Annotation not available	0	0	0	0	0	0	1	2	4.6	5.5	0	0	0	0	4.1	0	0	0	0.9	0	0	0	0	0
CLST109315 NOG:NOG12793,NOG:NOG145290 Avirulence protein	26.5	27.1	0	0	0	0	0	0	0	0	0	0	0	0	0	0	0	0	0	0	0	0	0	0
CLST109374 hypothetical protein	0	0	0	0	0	0	0	0	0	0	0	0	0	0	0	0	0	0	0	0	0	0	2.7	0
CLST109401 KEGG:K02056,TIGR:TIGR03740,TIGR:TIGR01288,TIGR:TIGR03265,COG:COG3845,TIGR:TIGR02314,TIGR:TIGR02857,TIGR:TIGR03864,TIGR:TIGR02633 ABC-type uncharacterized transport systems, ATPase components	0	3.5	1	3.1	0	0	2	0	0	0	0	0	0	0	0	0	0	0	0	1.8	0	0	0	0
CLST109425 hypothetical protein	1.1	0	0	0	0	0	0	0	0	0	0	0	0	0	0	0	0	0	0	0	0	0	0	0
CLST109545 TIGR:TIGR00062,KEGG:K02899,COG:COG0211 Ribosomal protein L27	0	0	2	2.1	0	0	3	3	2.7	2.7	0	4.5	0	0	0	0	0	0	0	0	0	0	0	0
CLST109636 COG:COG1918,KEGG:K04758 Fe2+ transport system protein A	0	0	0	0	0	0	0	0	0	0.9	0	0	0	0	0	0	0	0	0	0	0	0	0	0
CLST109723 PFAM:PF12327.1,KEGG:K03531,TIGR:TIGR00065,COG:COG0206 Cell division GTPase	0	0	0	0	0	0	0	0	1.8	0	0	0	0	0	0	0	0	0	0	0	0	0	0	0
CLST109906 PFAM:PF03894.8,PFAM:PF09363.3,KEGG:K01621,KEGG:K01636,KEGG:K01632,PFAM:PF09364.3,COG:COG3957 Phosphoketolase	0	0	0	0	0	0	0	0	0	0	3.3	0	0	0	0	0	0	0	0	0	0	0	0.9	0
CLST110091 COG:COG0148,KEGG:K01689,TIGR:TIGR01060 Enolase	0	0	0	0	0	0	0	0	0	0	2.2	2.2	0	0	0	0	0	0	0	0	0	0	0	0
CLST110218 COG:COG0813,TIGR:TIGR00107,KEGG:K03784 Purine-nucleoside phosphorylase	0	2.4	0	0	0	0	0	0	0	0	0	0	0	0	0	0	0	0	0	0	0	0	0	0
CLST110347 KEGG:K02112,COG:COG0055,TIGR:TIGR01039 F0F1-type ATP synthase, beta subunit	0	0	0	0	0	0	0	0	0	0	0	0	0	0	0	0	0	0	0	0	0	0	0	0.9
CLST110407 KEGG:K02032,TIGR:TIGR02769,TIGR:TIGR02982,COG:COG4608,TIGR:TIGR01846,TIGR:TIGR01193,TIGR:TIGR02770 ABC-type oligopeptide transport system, ATPase component	0	0	0	0	0	0	0	2	0	0	0	0	0	0	0	0	0	0	0	0	0	0	0	0
CLST110447 COG:COG0088,KEGG:K02926,PFAM:PF00573.15 Ribosomal protein L4	5.3	10.6	13.3	13.4	0	0	0	0	0	0	4.4	6.7	0	0	3.1	4.1	0	0	7.2	4.5	0	0	0	0
CLST110678 TIGR:TIGR03346,COG:COG0542,KEGG:K03695,TIGR:TIGR00390 ATPases with chaperone activity, ATP-binding subunit	0	0	0	0	0	0	0	0	0	0	0	0	0	1.1	0	0	0	0	0	0	0	0	0	0
CLST110853 TIGR:TIGR03346,COG:COG0542,TIGR:TIGR02639,PFAM:PF00004.22,PFAM:PF07724.7,KEGG:K03696,PFAM:PF02861.13 ATPases with chaperone activity, ATP-binding subunit	0	0	0	0	0	0	1	0	0	0	0	0	0	0	0	0	0	0	0	0	0	0	0	0
CLST111004 TIGR:TIGR01044,KEGG:K02890,COG:COG0091 Ribosomal protein L22	0	0	0	0	0	0	2	2	0	0	0	0	0	0	0	0	2.3	0	0	0	0	0	0	0
CLST111152 TIGR:TIGR01859,COG:COG0191,KEGG:K01624 Fructose/tagatose bisphosphate aldolase	0	0	0	0	0	0	0	0	1.8	2.7	0	1.1	0	0	0	0	0	0	0	0	0	0	0	0
CLST111415 KEGG:K02956,TIGR:TIGR00952,COG:COG0184 Ribosomal protein S15P/S13E	0	0	0	0	0	0	4	0	8.2	5.5	2.2	8.9	0	0	0	0	0	0	0	0	0	0	0	0
CLST111497 KEGG:K10112,TIGR:TIGR01187,TIGR:TIGR01186,COG:COG3839 ABC-type sugar transport systems, ATPase components	0	0	1	0	0	0.9	0	0	0	0	0	0	0	0	0	0	0	0	0	0	0	0	0	0
CLST111637 KEGG:K02986,COG:COG0522,TIGR:TIGR01017 Ribosomal protein S4 and related proteins	0	0	0	0	0.9	0	0	0	0	0	0	0	0	0	0	0	0	0	0	0	0	0	0	0
CLST111685 COG:COG0822 NifU homolog involved in Fe-S cluster formation	0	0	0	0	0	0	2	0	5.5	5.5	0	1.1	0	0	0	0	0	0	0.9	2.7	1.1	0	1.8	1.8
CLST111919 TIGR:TIGR01044,KEGG:K02890,COG:COG0091 Ribosomal protein L22	5.3	3.5	0	0	0	0	5	0	0	0	0	0	0	0	0	0	0	0	3.6	5.4	0	0	0	1.8
CLST111982 COG:COG0459,KEGG:K04077,TIGR:TIGR02348 Chaperonin GroEL (HSP60 family)	59.4	68.5	3.1	2.1	0	0	4	3	5.5	6.4	0	0	0	0	0	0	0	0	7.2	10	0	0	5.4	5.3
CLST111993 hypothetical protein	0	0	0	0	0	0	0	0	0	0	0	2.2	0	0	0	0	0	0	0	0	0	0	0	0
CLST112140 TIGR:TIGR01784 T_den_put_tspse: conserved hypothetical protein	0	0	0	0	0	0	0	0	0	0	0	0	2	0	0	0	0	0	0	0	0	0	0	0
CLST112619 hypothetical protein	0	0	0	0	0	0	0	0	0	0	0	0	0	0	1	0	0	0	0	0	0	0	0	0
CLST112646 PFAM:PF01268.12,COG:COG2759,KEGG:K01938 Formyltetrahydrofolate synthetase	6.4	9.4	0	0	0	0	0	0	0	0	0	0	0	0	0	0	0	0	0	0	0	0	0	0
CLST112707 TIGR:TIGR01998,TIGR:TIGR02005,COG:COG1263,KEGG:K02804,TIGR:TIGR02002 Phosphotransferase system IIC components, glucose/maltose/N-acetylglucosamine-specific	8.5	14.2	0	0	0	0	0	0	0	0	0	0	0	0	0	0	0	0	0	4.5	0	0	0	0
CLST112789 hypothetical protein	0	0	0	0	1.8	0	0	0	0	0	0	0	0	0	0	0	0	0	0	0	0	0	0	0
CLST112828 COG:COG0050,KEGG:K02358,TIGR:TIGR00485 GTPases - translation elongation factors	40.3	40.1	5.1	5.1	0	0	16.1	12.9	8.2	8.2	0	0	0	0	0	0	0	0	17.1	15.4	0	0	13.4	11.6
CLST113150 TIGR:TIGR00484,KEGG:K02355,COG:COG0480 Translation elongation factors (GTPases)	22.3	31.9	12.3	11.3	0	0.9	4	2	0	0	0	0	0	0	0	0	0	0	11.7	13.6	0	0	32.3	34.7
CLST113232 TIGR:TIGR03178,TIGR:TIGR01224,COG:COG1228,PFAM:PF07969.4 Imidazolonepropionase and related amidohydrolases	0	0	0	0	0	0	0	0	2.7	2.7	0	0	0	0	0	0	0	0	0	0	0	0	0	0
CLST113307 COG:COG0326,KEGG:K04079 Molecular chaperone, HSP90 family	1.1	0	0	0	0	0	0	0	0	0	0	0	1	2.1	0	0	0	0	0	0	0	0	0	0
CLST113564 hypothetical protein	0	0	0	0	0	0	0	0	0	0	0	0	0	0	9.3	8.1	0	0	0	0	0	0	0	0
CLST113730 COG:COG0056,TIGR:TIGR00962,KEGG:K02111 F0F1-type ATP synthase, alpha subunit	0	0	0	0	0	0	0	0	0	0.9	0	0	0	0	0	0	0	0	0	0	0	0	0	0
CLST113782 PFAM:PF05683.5,COG:COG1838,KEGG:K01678 Tartrate dehydratase beta subunit/Fumarate hydratase class I, C-terminal domain	0	0	2	0	0	0	0	0	0	0	0	0	0	0	0	0	0	0	0	0	0	0	0	0
CLST113947 TIGR:TIGR00060,COG:COG0256,KEGG:K02881 Ribosomal protein L18	0	0	0	0	0	0	0	0	1.8	0	0	0	0	0	0	0	0	0	0	0	0	0	0	0
CLST114030 COG:COG0326,KEGG:K04079 Molecular chaperone, HSP90 family	0	0	7.2	6.2	0	0	0	0	0	0	0	0	2	0	0	0	0	0	0	0	0	0	0	0.9
CLST114138 hypothetical protein	0	0	0	0	0	0	0	0	1.8	0	0	0	0	0	0	0	0	0	0	0	0	0	0	0
CLST114177 COG:COG0012,KEGG:K06942,TIGR:TIGR00092 Predicted GTPase, probable translation factor	1.1	3.5	0	0	0	0	0	0	0	0	0	0	0	0	0	0	0	0	0	0	0	0	0	0
CLST114283 TIGR:TIGR01842,KEGG:K10112,TIGR:TIGR01187,TIGR:TIGR02315,TIGR:TIGR00958,TIGR:TIGR03265,TIGR:TIGR02203,COG:COG3839,TIGR:TIGR02204 ABC-type sugar transport systems, ATPase components	48.8	53.1	6.1	10.3	9	7.3	19.2	11.9	0	0	0	0	0	0	0	0	0	0	18.9	20.8	0	0	26	21.4
CLST114327 NOG:NOG138885,TIGR:TIGR01079,COG:COG0198,KEGG:K02895 Rrna binding protein	0	0	0	0	0	0	0	4	0	1.8	5.5	0	0	0	0	0	2.3	4.2	0	0	0	0	0	0
CLST114378 NOG:NOG148246 Receptor	0	0	0	0	0	0	0	0	0	0	0	0	2	1.1	0	0	0	0	0	0	0	2.2	0	0
CLST114469 KEGG:K02906,TIGR:TIGR03626,COG:COG0087,TIGR:TIGR03625 Ribosomal protein L3	0	0	0	0	0	0	7.1	4	0	0	0	0	0	0	0	0	0	0	0	0	0	0	0	0
CLST114480 PFAM:PF10385.2,KEGG:K03043,TIGR:TIGR02013,COG:COG0085 DNA-directed RNA polymerase, beta subunit/140 kD subunit	4.2	7.1	0	0	0	0	0	0	0	0	0	0	0	0	0	1	0	0	0.9	0.9	0	0	0	0.9
CLST114773 hypothetical protein	0	0	0	0	0	0	0	0	0	0	0	0	2	0	0	0	0	0	0	0	0	0	0	0
CLST114776 TIGR:TIGR00484,KEGG:K02355,COG:COG0480 Translation elongation factors (GTPases)	0	0	0	0	0	0	3	4	0	0	1.1	1.1	0	2.1	0	0	0	0	0	0	0	0	0	0
CLST115251 COG:COG0172,PFAM:PF02403.15,KEGG:K01875,TIGR:TIGR00414 Seryl-tRNA synthetase	2.1	0	0	0	0.9	0	2	0	0	0	0	0	0	0	0	0	0	0	1.8	2.7	0	0	0	0
CLST115339 KEGG:K01006,TIGR:TIGR01828,COG:COG0574 Phosphoenolpyruvate synthase/pyruvate phosphate dikinase	70.1	99.1	10.2	4.1	0.9	2.7	27.2	18.8	15.5	22	5.5	6.7	0	0	0	0	0	0	48.6	54.3	0	0	44.8	38.3
CLST115356 COG:COG4213,KEGG:K10546 ABC-type xylose transport system, periplasmic component	0	0	2	0	0	0	0	0	0	0	0	0	0	2.1	0	0	0	0	0	0	0	4.4	0	0
CLST115484 NOG:NOG14710,NOG:NOG139046 Dna-Directed RNA polymerase	0	0	0	0	0	0	0	0	0	0	0	0	0	0	0	0	0	0	0	0	0	0	4.5	3.6
CLST115572 KEGG:K01610,COG:COG1866 Phosphoenolpyruvate carboxykinase (ATP)	0	0	0	0	0	1.8	0	0	0	0	0	0	0	0	0	0	0	0	0	0	0	0	0	0
CLST116110 TIGR:TIGR01043,KEGG:K02117,COG:COG1155 Archaeal/vacuolar-type H+-ATPase subunit A	0	0	0	0	0	0	1	1	0	0	0	0	0	0	0	0	0	0	0	0	0	0	0	0
CLST116150 hypothetical protein	7.4	9.4	9.2	14.4	0	0	0	0	0	0	0	0	0	0	0	0	0	0	0	0	22.2	31.5	0	0
CLST116302 COG:COG2508,KEGG:K02647 Regulator of polyketide synthase expression	2.1	0	0	0	0	0	2	0	0	0	0	0	0	0	0	0	0	0	0	0	0	0	0	0
CLST116348 KEGG:K01945,TIGR:TIGR00877,COG:COG0151 Phosphoribosylamine-glycine ligase	0	3.5	0	0	0	0	0	0	0	0	0	0	0	0	0	0	0	0	0	0	0	0	0	0
CLST116423 KEGG:K02876,COG:COG0200,TIGR:TIGR01071 Ribosomal protein L15	0	0	0	0	0	0	0	0	4.6	9.2	0	0	0	0	0	0	0	0	0	0	0	0	0	0
CLST116431 COG:COG1082 Sugar phosphate isomerases/epimerases	0	0	0	0	0	0	2	0	0	0	0	3.3	0	0	0	0	0	0	0	0	0	0	0	0
CLST116441 hypothetical protein	0	0	0	0	0	0	0	0	0	0	0	0	0	1.1	0	0	0	0	0	0	0	0	0	0
CLST116644 NOG:NOG130229 Annotation not available	0	0	0	0	0	0	0	0	0	0	0	0	0	0	5.2	6.1	4.5	5.3	0	0	0	0	0	0
CLST116675 PFAM:PF10385.2,PFAM:PF04565.9,KEGG:K03043,PFAM:PF04560.13,TIGR:TIGR02013,COG:COG0085,PFAM:PF00562.21 DNA-directed RNA polymerase, beta subunit/140 kD subunit	0	0	1	0	0	0	1	2	0	0	0	0	0	0	0	0	0	0	0	0	0	0	0	0
CLST116692 TIGR:TIGR00002,KEGG:K02959,COG:COG0228 Ribosomal protein S16	0	0	0	0	0	0	0	0	9.1	7.3	4.4	7.8	0	0	0	0	0	0	0	0	0	2.2	1.8	2.7
CLST116750 COG:COG0238,KEGG:K02963,TIGR:TIGR00165 Ribosomal protein S18	0	0	0	0	0	0	0	0	0	0	0	0	0	0	0	0	0	0	0	0	0	0	1.8	1.8
CLST117001 PFAM:PF00478.18,KEGG:K00088,PFAM:PF00571.21,COG:COG0516 IMP dehydrogenase/GMP reductase	5.3	10.6	0	0	0	0	0	0	0	0.9	0	0	0	0	0	0	0	0	1.8	0.9	0	0	0	0
CLST117035 TIGR:TIGR02475,KEGG:K02234,PFAM:PF02492.12,COG:COG0523 Putative GTPases (G3E family)	0	0	0	0	0	0	3	0	0	0	0	0	0	0	0	1	0	0	0	0	0	0	0	2.7
CLST117371 KEGG:K00262,COG:COG0334,PFAM:PF00208.14 Glutamate dehydrogenase/leucine dehydrogenase	0	0	2	1	0	0	0	0	0	0	0	0	0	0	0	0	0	0	0	0	0	0	0	0
CLST117468 NOG:NOG12620 Annotation not available	0	0	0	0	0	0	0	0	0	0	0	0	0	0	0	0	0	0	0	0	0	0	6.3	5.3
CLST117615 NOG:NOG12793 Calcium ion binding protein	12.7	5.9	0	0	0	0	0	0	0	0	0	0	0	0	0	0	0	0	0	0	4.2	3.3	0	0
CLST117798 NOG:NOG82582 Annotation not available	0	0	0	0	0	0	0	0	0	0	0	0	0	0	0	2	0	0	0	0	0	0	0	0
CLST117826 TIGR:TIGR01169,COG:COG0081,KEGG:K02863 Ribosomal protein L1	0	0	7.2	5.1	0	0	0	3	0	0	2.2	4.5	0	0	0	0	0	0	0	0	0	0	0	0
CLST117844 KEGG:K02994,COG:COG0096,PFAM:PF00410.12 Ribosomal protein S8	1.1	0	0	0	0	0	3	0	6.4	8.2	0	3.3	0	0	0	2	0	0	0	0	0	0	0	0
CLST117932 TIGR:TIGR01003,NOG:NOG80964,KEGG:K11189 Phosphocarrier protein	0	0	0	0	0	0	0	0	0	1.8	0	0	0	0	0	0	7.9	8.4	0	0	0	0	0	0
CLST118044 TIGR:TIGR01117,COG:COG4799,KEGG:K01966 Acetyl-CoA carboxylase, carboxyltransferase component (subunits alpha and beta)	0	0	0	0	0	0	0	0	0	0	0	0	0	2.1	0	0	0	0	0.9	0.9	0	0	0	0
CLST118105 PFAM:PF01268.12,COG:COG2759,KEGG:K01938 Formyltetrahydrofolate synthetase	0	0	0	0	0	0	4	0	0	0	0	0	0	0	0	0	0	0	0	0	0	0	0	0
CLST118128 TIGR:TIGR01024,COG:COG0335,KEGG:K02884 Ribosomal protein L19	3.2	0	4.1	4.1	0	0	2	3	0	0	0	0	0	0	0	0	0	0	1.8	0.9	0	0	0	0
CLST118352 TIGR:TIGR01859,COG:COG0191,KEGG:K01624 Fructose/tagatose bisphosphate aldolase	25.5	37.8	10.2	13.4	0	0	0	1	4.6	5.5	0	0	0	0	0	1	0	1.1	6.3	10	0	0	1.8	0
CLST118491 TIGR:TIGR00105,COG:COG0254,KEGG:K02909 Ribosomal protein L31	0	0	0	0	0	0	0	0	1.8	1.8	0	0	0	0	0	0	0	0	0	0	0	0	2.7	2.7
CLST118597 hypothetical protein	2.1	2.4	0	0	0	0	0	0	0	0	0	0	0	0	0	0	0	0	0	0	0	0	0	0
CLST118599 PFAM:PF00441.17,COG:COG1960,KEGG:K00257,PFAM:PF02771.9,PFAM:PF02770.12,KEGG:K00248 Acyl-CoA dehydrogenases	78.5	99.1	32.8	33	0	0	14.1	16.8	7.3	8.2	0	0	0	0	0	0	0	0	27.9	30.8	0	0	16.1	18.7
CLST118634 COG:COG3958,KEGG:K00615 Transketolase, C-terminal subunit	0	0	0	0	0	0	0	0	0	0	0	0	0	0	0	0	0	0	0	0	0	0	0	0.9
CLST118888 PFAM:PF07664.5,PFAM:PF02421.11,COG:COG0370,KEGG:K04759,TIGR:TIGR00437 Fe2+ transport system protein B	2.1	3.5	0	0	0	0	0	0	0	0.9	0	0	0	0	0	0	0	0	0.9	0.9	0	0	0	0
CLST118900 KEGG:K04567,COG:COG1190,TIGR:TIGR00499 Lysyl-tRNA synthetase (class II)	13.8	9.4	0	0	0	0	3	0	0	0	0	0	0	0	0	0	0	0	0	0	0	0	0	0
CLST119141 TIGR:TIGR02176,COG:COG1014,KEGG:K03737,COG:COG0674 Pyruvate:ferredoxin oxidoreductase and related 2-oxoacid:ferredoxin oxidoreductases, alpha subunit	0	0	0	0	0	0	0	0	0	0	2.2	2.2	1	0	0	0	0	0	0	0	0	0	0	0
CLST119195 TIGR:TIGR00484,KEGG:K02355,COG:COG0480 Translation elongation factors (GTPases)	0	0	1	0	0	0	0	0	0	0	0	0	0	0	0	0	0	0	0	0	0	0	0	0
CLST119304 COG:COG0291,TIGR:TIGR00001,KEGG:K02916 Ribosomal protein L35	0	0	0	0	0	0	0	0	0	0.9	0	0	0	0	0	0	0	0	0	0	0	0	0	0
CLST119351 KEGG:K02887,TIGR:TIGR01032,COG:COG0292 Ribosomal protein L20	0	0	0	0	0	0	3	3	15.5	15.6	0	0	0	0	0	0	0	0	0	0	0	0	0	0
CLST119502 PFAM:PF00162.12,COG:COG0126,KEGG:K00927 3-phosphoglycerate kinase	13.8	16.5	2	3.1	0	0	6	0	0	0	0	0	0	0	0	0	0	0	0	0.9	0	0	9	7.1
CLST119519 hypothetical protein	2.1	0	0	0	0	0	0	0	0	0	0	0	0	0	0	0	0	0	0	0	0	0	0	0
CLST119559 hypothetical protein	0	0	0	0	0	0	3	0	6.4	3.7	0	0	0	0	0	0	0	0	0	0	0	0	0	0
CLST119611 KEGG:K10441,KEGG:K02056,COG:COG1129,KEGG:K10542,PFAM:PF00005.20,TIGR:TIGR02633 ABC-type sugar transport system, ATPase component	3.2	0	0	0	0	0	0	0	0	0	0	0	0	0	0	0	0	0	3.6	1.8	0	0	1.8	0
CLST119916 KEGG:K09157,PFAM:PF05167.5,COG:COG2848 Uncharacterized conserved protein	0	2.4	0	2.1	0	0	0	0	0	0	0	0	0	0	0	0	0	0	0	0	0	0	0	0
CLST119992 TIGR:TIGR01079,COG:COG0198,KEGG:K02895 Ribosomal protein L24	0	0	0	0	0	0	0	0	0	0	0	0	0	0	0	0	0	0	0	0	0	0	3.6	5.3
CLST120034 KEGG:K02892,PFAM:PF00276.13,COG:COG0089 Ribosomal protein L23	0	0	0	0	0	0	0	3	1.8	5.5	3.3	0	0	0	0	0	2.3	0	0	0	0	0	0	0
CLST120144 TIGR:TIGR00106,PFAM:PF01910.10,COG:COG0011 Uncharacterized conserved protein	2.1	0	0	0	0	0	0	0	0	0	2.2	3.3	0	0	0	0	0	0	0	0	0	0	0	0
CLST120206 KEGG:K00266,COG:COG0493,TIGR:TIGR01316 NADPH-dependent glutamate synthase beta chain and related oxidoreductases	0	1.2	0	0	0	0	0	0	0	0	0	0	0	0	0	0	0	0	0	0	0	0	0	0
CLST120280 COG:COG0329,PFAM:PF00701.15,KEGG:K01714 Dihydrodipicolinate synthase/N-acetylneuraminate lyase	0	0	0	0	0	0	0	0	0	0	0	0	0	0	0	0	2.3	2.1	0	0	0	0	0	0
CLST120459 KEGG:K04078,PFAM:PF00166.14,COG:COG0234 Co-chaperonin GroES (HSP10)	3.2	0	4.1	4.1	0	0	8.1	10.9	13.7	11.9	3.3	4.5	0	0	9.3	6.1	6.8	3.2	0	0	0	0	2.7	1.8
CLST120523 KEGG:K07042,COG:COG0319,TIGR:TIGR00043 Predicted metal-dependent hydrolase	0	0	0	0	0	0	2	0	0	0	0	0	0	0	0	0	0	0	0	0	0	0	0	0
CLST120578 TIGR:TIGR00855,KEGG:K02935,COG:COG0222 Ribosomal protein L7/L12	0	0	0	1	0	0	7.1	4.9	15.5	16.5	9.9	5.6	0	0	0	4.1	2.3	3.2	0	0	0	0	0	0
CLST120582 KEGG:K00688,COG:COG0058,TIGR:TIGR02093 Glucan phosphorylase	3.2	2.4	0	0	0	0	0	0	0	0	0	0	0	0	0	0	0	0	0	0	0	0	0	0
CLST120587 TIGR:TIGR03631,COG:COG0099,KEGG:K02952 Ribosomal protein S13	5.3	4.7	2	2.1	0	0	0	0	0	0	0	0	0	0	0	0	0	0	0.9	0.9	0	0	0	0
CLST120674 KEGG:K00194,TIGR:TIGR00381,COG:COG2069 CO dehydrogenase/acetyl-CoA synthase delta subunit (corrinoid Fe-S protein)	3.2	2.4	0	0	0	0	0	0	1.8	0	0	0	0	2.1	0	0	0	0	0	0	0	0	0	0
CLST120731 KEGG:K01218,COG:COG4124 Beta-mannanase	0	0	0	0	0	0	0	0	0	0	0	0	0	0	0	0	0	0	2.7	2.7	0	0	0	0
CLST120825 TIGR:TIGR02176,COG:COG1014,KEGG:K03737,COG:COG0674,COG:COG1013 Pyruvate:ferredoxin oxidoreductase and related 2-oxoacid:ferredoxin oxidoreductases, alpha subunit	0	0	0	1	0	0	7.1	8.9	3.7	3.7	0	1.1	0	0	0	0	0	0	0	0.9	0	0	0	0
CLST120877 COG:COG0540,KEGG:K00609,TIGR:TIGR00670 Aspartate carbamoyltransferase, catalytic chain	8.5	3.5	0	0	0	0	0	0	0	0	0	0	0	0	0	0	0	0	0	1.8	0	0	0	0.9
CLST121095 hypothetical protein	0	0	0	0	0	0	0	0	0	0	0	0	6	0	0	0	0	0	2.7	0	0	0	0	0
CLST121264 COG:COG0261,PFAM:PF00829.14,KEGG:K02888 Ribosomal protein L21	0	0	2	0	0	0	3	2	3.7	4.6	0	0	0	0	0	0	2.3	0	0	0	0	0	0	0
CLST121337 KEGG:K02986,COG:COG0522,TIGR:TIGR01017 Ribosomal protein S4 and related proteins	0	0	0	0	0	0	0	0	2.7	4.6	0	1.1	0	0	0	0	0	0	0	0	0	0	0	0
CLST121416 TIGR:TIGR00032,KEGG:K01940,COG:COG0137 Argininosuccinate synthase	0	0	0	2.1	0	0	0	0	0	0	0	0	0	0	0	0	0	0	0	0	0	0	0	0
CLST121538 TIGR:TIGR01123,KEGG:K00826,COG:COG0115 Branched-chain amino acid aminotransferase/4-amino-4-deoxychorismate lyase	0	0	0	0	0	0	0	0	0	0	0	0	0	0	0	0	0	0	0	0	0	0	0	1.8
CLST121717 hypothetical protein	0	0	0	0	0	0	0	0	0	0	0	0	0	0	1	1	0	0	0	0	0	0	0	0
CLST121907 KEGG:K06217,COG:COG1702,PFAM:PF02562.9 Phosphate starvation-inducible protein PhoH, predicted ATPase	2.1	0	0	0	0	0	0	0	0	0	0	0	0	0	0	0	0	0	0	0	0	0	0	0
CLST122071 NOG:NOG76717,PFAM:PF07660.7,NOG:NOG78068 Annotation not available	0	0	0	0	0	0	0	0	0	0	0	0	1	1.1	0	0	0	0	0	0	0	0	0	0
CLST122102 TIGR:TIGR01169,COG:COG0081,KEGG:K02863 Ribosomal protein L1	0	0	0	0	0	0	0	0	0	2.7	0	0	0	0	0	0	0	0	0	0	0	0	0	0
CLST122185 KEGG:K02356,COG:COG0231,TIGR:TIGR00038 Translation elongation factor P (EF-P)/translation initiation factor 5A (eIF-5A)	0	0	7.2	5.1	0	0	0	0	0	0	0	0	0	0	0	0	0	0	0	0	0	0	0	1.8
CLST122426 hypothetical protein	0	0	0	0	0	0	0	0	0	0	0	0	0	0	0	0	0	0	0	0	0	0	0.9	0
CLST122427 KEGG:K01492,COG:COG0138,KEGG:K00602,TIGR:TIGR00355 AICAR transformylase/IMP cyclohydrolase PurH (only IMP cyclohydrolase domain in Aful)	9.6	4.7	0	0	0	0	0	0	0	0	0	0	0	0	0	0	0	0	0	0	0	0	0	0
CLST122441 KEGG:K04043,COG:COG0443,TIGR:TIGR02350 Molecular chaperone	0	0	0	0	0	0	0	0	0	0	0	0	0	0	0	0	0	0	0	0	0	0	0.9	0.9
CLST122517 COG:COG0166,KEGG:K01810 Glucose-6-phosphate isomerase	12.7	20.1	0	0	1.8	1.8	0	0	0	0	0	0	0	0	0	0	0	0	2.7	4.5	0	0	0	1.8
CLST123203 COG:COG1012,TIGR:TIGR02638,TIGR:TIGR02518,KEGG:K04072,COG:COG1454 NAD-dependent aldehyde dehydrogenases	0	0	0	0	0	0	0	0	0.9	0.9	0	0	0	0	0	0	0	0	0	0	0	0	6.3	4.4
CLST123242 TIGR:TIGR00158,KEGG:K02939,PFAM:PF01281.12,COG:COG0359,PFAM:PF03948.7 Ribosomal protein L9	0	3.5	2	2.1	0	0	0	0	0	0	0	0	0	4.3	0	0	0	0	0	0	0	0	0	0
CLST123328 COG:COG5016,TIGR:TIGR01108,KEGG:K01571 Pyruvate/oxaloacetate carboxyltransferase	14.9	13	1	1	0	0	5	3	0	0	0	0	0	0	0	0	0	0	3.6	3.6	0	0	0.9	2.7
CLST123337 COG:COG1592,PFAM:PF02915.10,KEGG:K00532 Rubrerythrin	0	0	0	0	0	0	4	2	2.7	2.7	0	0	0	0	3.1	4.1	0	0	0	0	0	0	0	0
CLST123379 NOG:NOG75757 Receptor	0	0	7.2	2.1	0	0	0	0	0	0	0	0	0	4.3	0	0	0	0	0	0	0	0	0	0
CLST123402 KEGG:K02058,COG:COG1879 ABC-type sugar transport system, periplasmic component	4.2	0	0	0	0	0	0	0	0	0	0	0	0	0	0	0	0	0	0	0	4.2	0	0	0
CLST123405 hypothetical protein	0	0	0	0	0	0	0	0	0	0	0	0	0	3.2	0	0	0	0	0	0	0	0	0	0
CLST123637 KEGG:K01803,COG:COG0149,PFAM:PF00121.11 Triosephosphate isomerase	14.9	14.2	3.1	2.1	0	0	6	7.9	1.8	0	0	0	0	0	0	0	0	0	2.7	1.8	0	0	3.6	1.8
CLST123723 COG:COG1048,KEGG:K01681,TIGR:TIGR01342 Aconitase A	0	0	0	0	0	0	0	0	0	0.9	0	0	0	0	0	0	0	0	0	0	0	0	0	0
CLST123908 PFAM:PF03786.6,TIGR:TIGR00695,COG:COG1312,KEGG:K01686 D-mannonate dehydratase	8.5	3.5	0	0	0	0	0	0	1.8	0	0	0	0	0	0	0	0	0	0	8.2	0	0	4.5	0
CLST124054 NOG:NOG85887 Receptor	0	0	0	0	0	0	0	0	0	0	0	0	0	0	0	0	0	0	0	0	23.3	20.7	0	0
CLST124190 TIGR:TIGR01192,TIGR:TIGR03797,TIGR:TIGR02203,TIGR:TIGR01193,TIGR:TIGR02857,KEGG:K06147,TIGR:TIGR02204,COG:COG1132 ABC-type multidrug transport system, ATPase and permease components	4.2	2.4	0	0	0	0	0	0	0	0	0	0	0	0	0	0	0	0	0	0	0	0	0	0
CLST124281 NOG:NOG130229,NOG:NOG70031 Annotation not available	0	0	0	0	0	0	0	0	0	0	0	0	0	0	1	0	0	0	0	0	0	0	0	0
CLST124548 COG:COG4842 Uncharacterized protein conserved in bacteria	0	0	6.1	0	0	0	0	0	0	0	2.2	7.8	0	0	0	0	0	0	0	0	0	0	0	0
CLST124749 COG:COG0102,KEGG:K02871,TIGR:TIGR01066 Ribosomal protein L13	0	0	0	0	0	0	3	2	0	0	2.2	0	0	0	0	0	0	0	0	0	0	0	0	0
CLST124894 TIGR:TIGR01003,KEGG:K11189,COG:COG1925 Phosphotransferase system, HPr-related proteins	0	0	0	0	0	0	7.1	12.9	0	1.8	0	0	0	0	0	0	0	0	0	0	0	0	0	0
CLST124922 NOG:NOG114810 Receptor	0	0	0	0	0	0	0	0	2.7	1.8	0	0	0	0	0	0	0	0	0	0	0	0	0	0
CLST125193 PFAM:PF10609.2,KEGG:K03593,KEGG:K03605,COG:COG0489 ATPases involved in chromosome partitioning	0	0	0	0	0	0	0	0	0	0	2.2	0	0	2.1	0	0	0	0	0	0	0	0	0	0
CLST125243 TIGR:TIGR01041,KEGG:K02118,COG:COG1156 Archaeal/vacuolar-type H+-ATPase subunit B	0	0	0	0	0	0	2	2	0	0	0	0	0	0	0	0	0	0	0	0	0	0	0	0
CLST125309 KEGG:K00048,TIGR:TIGR02638,COG:COG1454 Alcohol dehydrogenase, class IV	9.6	17.7	1	0	0	0	2	0	1.8	0.9	0	0	0	0	2.1	2	0	0	0	0.9	0	0	8.1	4.4
CLST125372 hypothetical protein	0	0	0	0	0	0	0	2	0	0	0	11.2	13	17.1	0	0	3.4	2.1	0	0	0	0	0	0
CLST125604 COG:COG0103,KEGG:K02996,PFAM:PF00380.12 Ribosomal protein S9	0	0	0	0	0	0	2	2	0	0	7.7	3.3	0	0	0	0	0	0	0	0	0	0	0	0
CLST125716 hypothetical protein	0	0	0	0	0	0	0	0	0	0	0	0	0	0	0	0	0	0	0	0	0	0	2.7	1.8
CLST125941 KEGG:K02838,TIGR:TIGR00496,COG:COG0233 Ribosome recycling factor	4.2	0	0	3.1	4.5	1.8	0	0	0	1.8	3.3	0	3	5.3	0	2	0	0	1.8	2.7	0	0	0	2.7
CLST126100 hypothetical protein	0	0	0	0	0	0	0	0	0	0.9	0	0	0	0	0	0	0	0	0	0	0	0	0	0
CLST126319 COG:COG2152,PFAM:PF04041.6 Predicted glycosylase	2.1	5.9	4.1	0	0	0	0	0	0	0	0	0	0	0	0	0	0	0	0	3.6	0	0	0	0
CLST126898 KEGG:K01591,COG:COG0284,TIGR:TIGR02127 Orotidine-5-phosphate decarboxylase	2.1	2.4	0	0	0	0	0	0	0	0	0	0	0	0	0	0	0	0	0	0	0	0	0	0
CLST126924 COG:COG3934 Endo-beta-mannanase	0	0	0	0	0	0	0	0	0	0	0	0	0	0	0	0	0	0	1.8	0	0	0	0	0
CLST126956 PFAM:PF00831.16,KEGG:K02904,COG:COG0255 Ribosomal protein L29	2.1	0	0	0	0	0	2	3	4.6	2.7	0	3.3	0	0	4.1	0	0	0	0	0	0	2.2	0	0
CLST127093 NOG:NOG86857 Annotation not available	4.2	0	0	0	0	0	0	0	0	0	0	0	0	0	0	0	0	0	0	0	11.6	10.9	6.3	2.7
CLST127399 TIGR:TIGR00453,KEGG:K12506,TIGR:TIGR00151,COG:COG0245,KEGG:K01770 2C-methyl-D-erythritol 2,4-cyclodiphosphate synthase	3.2	2.4	0	0	0	0	0	0	0	0	0	0	0	0	0	0	0	0	0	0	0	0	0	0
CLST127627 KEGG:K04043,COG:COG0443,TIGR:TIGR02350 Molecular chaperone	42.5	37.8	7.2	4.1	0	0	21.2	10.9	1.8	2.7	0	0	0	0	0	0	0	0	14.4	18.1	0	0	30.5	19.6
CLST127802 hypothetical protein	0	0	0	0	0	0	0	0	0	0	0	0	0	0	0	0	0	0	0	0	0	0	0	0.9
CLST128118 COG:COG1447,TIGR:TIGR00823,KEGG:K02759 Phosphotransferase system cellobiose-specific component IIA	0	0	0	0	0	0	4	3	0	0	2.2	0	0	0	0	0	0	0	0	0	0	0	0	0
CLST128315 PFAM:PF01799.13,TIGR:TIGR03194,TIGR:TIGR02963,COG:COG1529,COG:COG2080,TIGR:TIGR03311,TIGR:TIGR03193,TIGR:TIGR03196,TIGR:TIGR02969,KEGG:K07469,TIGR:TIGR03313,TIGR:TIGR02965 Aerobic-type carbon monoxide dehydrogenase, large subunit CoxL/CutL homologs	2.1	5.9	3.1	2.1	7.2	7.3	0	0	0	0	6.6	7.8	0	0	0	0	0	2.1	10.8	11.8	0	0	2.7	5.3
CLST128446 PFAM:PF01268.12,COG:COG2759,KEGG:K01938 Formyltetrahydrofolate synthetase	2.1	1.2	0	0	0	0	1	2	0	0	0	0	0	0	0	0	0	0	0	0	0	0	0	0
CLST128455 KEGG:K02986,COG:COG0522,TIGR:TIGR01017 Ribosomal protein S4 and related proteins	3.2	8.3	0	0	0	0	4	7.9	0	0	0	0	0	0	0	0	0	0	0	0	0	0	2.7	4.4
CLST128645 KEGG:K02112,COG:COG0055,TIGR:TIGR01039 F0F1-type ATP synthase, beta subunit	0	0	0	0	0	0	1	0	0	0	0	0	0	0	0	0	0	0	0	0	0	0	0	0
CLST128701 hypothetical protein	3.2	2.4	0	0	0	0	0	0	0	0	0	0	0	0	0	0	0	0	0	0	0	0	0	0
CLST128938 NOG:NOG85887 Receptor	0	0	0	0	0	0	0	0	0	0	0	0	0	2.1	1	1	0	0	0	0	0	0	0	0
CLST129203 COG:COG0205,KEGG:K00850,TIGR:TIGR02483 6-phosphofructokinase	2.1	4.7	0	0	0	0	0	0	0	0	0	0	0	0	0	0	0	0	0	0	0	0	0	0
CLST129603 COG:COG1185,KEGG:K00962,TIGR:TIGR03591 Polyribonucleotide nucleotidyltransferase (polynucleotide phosphorylase)	18	13	4.1	7.2	0	0	0	0	0	0	0	0	0	0	5.2	0	0	0	1.8	2.7	0	0	0	1.8
CLST129617 TIGR:TIGR02027,COG:COG0202,KEGG:K03040 DNA-directed RNA polymerase, alpha subunit/40 kD subunit	11.7	13	0	0	0	0	4	0	0	0	0	0	0	0	0	0	0	0	0	0.9	0	0	6.3	5.3
CLST129690 KEGG:K04487,COG:COG1104,TIGR:TIGR03402 Cysteine sulfinate desulfinase/cysteine desulfurase and related enzymes	0	0	0	1	0	0	0	0	0	0	0	0	0	0	0	0	0	0	0	0	0	0	0	0
CLST129692 COG:COG1653 ABC-type sugar transport system, periplasmic component	0	0	5.1	7.2	0	0	0	0	0	0	0	0	0	0	0	0	0	0	0	0	0	0	0	0
CLST129756 KEGG:K02994,COG:COG0096,PFAM:PF00410.12 Ribosomal protein S8	4.2	10.6	0	0	0	0	8.1	0	0	1.8	0	0	0	0	0	0	0	0	9	10	0	0	0	0
CLST129835 KEGG:K02906,COG:COG0087,TIGR:TIGR03625 Ribosomal protein L3	6.4	5.9	0	2.1	0	0	4	0	0	0	0	0	0	0	0	0	0	0	0	1.8	0	0	4.5	2.7
CLST129980 NOG:NOG85156 Receptor	0	0	0	0	0	0	0	0	0	0	0	0	0	0	0	0	1.1	0	0	0	0	0	0	0
CLST130111 KEGG:K00656,TIGR:TIGR01255,COG:COG1882 Pyruvate-formate lyase	0	0	0	0	0	0	1	0	0	0	0	0	0	0	0	0	0	0	0	0	0	0	0	0
CLST130790 PFAM:PF06165.4,KEGG:K00702,PFAM:PF06204.4,COG:COG3459 Cellobiose phosphorylase	0	0	0	0	0	0	0	0	0	0	0	0	0	0	0	0	0	0	0	1.8	0	0	0	0
CLST130835 COG:COG0268,KEGG:K02968,TIGR:TIGR00029 Ribosomal protein S20	0	0	0	0	0	1.8	0	0	0	1.8	0	0	3	2.1	0	0	0	0	0	1.8	2.1	3.3	0	0
CLST130865 NOG:NOG39908,PFAM:PF01636.16 Phosphotransferase	0	0	0	0	0	0	0	0	0	0	0	0	0	0	0	2	0	0	0	0	0	0	0	0
CLST130872 COG:COG3959,KEGG:K00615,PFAM:PF00456.14 Transketolase, N-terminal subunit	0	0	0	0	0	0	2	0	0	0	0	0	0	0	0	0	0	0	0	0	0	0	0	0
CLST131024 KEGG:K02356,COG:COG0231,TIGR:TIGR00038 Translation elongation factor P (EF-P)/translation initiation factor 5A (eIF-5A)	6.4	4.7	0	0	0	0	5	0	0	0	0	0	0	0	0	0	0	0	3.6	3.6	0	0	0	0
CLST131072 TIGR:TIGR00978,COG:COG0136,KEGG:K00133 Aspartate-semialdehyde dehydrogenase	5.3	9.4	0	1	0	0	0	0	0	0	0	5.6	0	0	0	0	0	0	2.7	3.6	0	0	0.9	0
CLST131143 TIGR:TIGR00032,KEGG:K01940,COG:COG0137 Argininosuccinate synthase	4.2	0	0	0	0	0	0	0	0	0	0	0	0	0	0	0	0	0	0.9	0	0	0	0	1.8
CLST131162 KEGG:K02933,COG:COG0097,TIGR:TIGR03654 Ribosomal protein L6P/L9E	0	0	0	0	0	0	4	3	1.8	3.7	0	0	0	0	0	0	0	0	0	0	0	0	0	0
CLST131187 KEGG:K02992,TIGR:TIGR01029,COG:COG0049 Ribosomal protein S7	9.6	7.1	2	2.1	0	0	5	5.9	0.9	0	0	0	0	0	0	0	0	0	0	0	0	0	1.8	2.7
CLST131299 COG:COG1592 Rubrerythrin	19.1	29.5	11.3	5.1	0	0	21.2	19.8	0	0	3.3	0	0	0	0	0	0	0	1.8	1.8	0	0	0.9	1.8
CLST131541 KEGG:K02887,TIGR:TIGR01032,COG:COG0292 Ribosomal protein L20	0	0	0	0	0	0	0	0	0	0	0	0	0	0	0	0	0	0	2.7	0	0	0	0	0
CLST131688 KEGG:K02760,TIGR:TIGR00853,COG:COG1440 Phosphotransferase system cellobiose-specific component IIB	0	0	0	0	0	0	6	3	0	0	0	0	0	0	0	0	0	3.2	0	0	0	0	0	0
CLST131755 COG:COG0056,TIGR:TIGR00962,KEGG:K02111 F0F1-type ATP synthase, alpha subunit	0	0	0	0	0	0	0	1	0	0	0	0	0	0	0	0	0	0	0	0	0	0	0	0
CLST131789 TIGR:TIGR01930,COG:COG0183,KEGG:K00626 Acetyl-CoA acetyltransferase	74.3	114.5	18.4	19.6	0	0	30.2	0	5.5	12.8	0	0	0	0	0	0	0	0	30.6	40.8	0	0	18.8	17.8
CLST131807 hypothetical protein	0	0	0	0	0	0	0	0	0	0	0	0	0	2.1	0	0	0	0	0	0	0	0	0	0
CLST131865 TIGR:TIGR00465,COG:COG0059,PFAM:PF01450.12,PFAM:PF07991.5,KEGG:K00053 Ketol-acid reductoisomerase	2.1	2.4	0	0	0	0	0	0	0	0	0	0	0	0	0	0	0	0	0	0	0	0	0	1.8
CLST131887 KEGG:K01687,COG:COG0129,TIGR:TIGR00110 Dihydroxyacid dehydratase/phosphogluconate dehydratase	0	5.9	0	0	0	0	0	0	0	0	0	0	0	0	0	0	0	0	1.8	0	0	0	0	0
CLST132416 hypothetical protein	0	0	0	0	1.8	0	0	0	0	0	0	0	0	0	0	0	0	0	5.4	3.6	0	0	0	0
CLST132619 hypothetical protein	9.6	7.1	0	0	0	0	0	0	0	0	0	0	0	0	0	0	0	0	2.7	0	0	0	0	0
CLST132876 KEGG:K00789,COG:COG0192,TIGR:TIGR01034 S-adenosylmethionine synthetase	1.1	2.4	0	0	0	0	1	2	0	0	1.1	1.1	0	0	0	0	0	0	0	0	0	0	1.8	0
CLST132947 COG:COG1951,TIGR:TIGR00722,KEGG:K01677,PFAM:PF05681.7 Tartrate dehydratase alpha subunit/Fumarate hydratase class I, N-terminal domain	0	0	3.1	0	0	0	0	0	0	0	0	0	0	0	0	0	0	0	0	0	0	0	0	0
CLST133080 KEGG:K03046,COG:COG0086,TIGR:TIGR02386 DNA-directed RNA polymerase, beta subunit/160 kD subunit	0	0	0	0	0	0	0	0	0	0	0	1.1	0	0	0	0	0	0	0	0	0	0	0	0
CLST133204 TIGR:TIGR01171,COG:COG0090,KEGG:K02886 Ribosomal protein L2	2.1	3.5	0	0	0	0	2	0	0	0	0	0	0	0	0	0	0	0	1.8	0.9	0	0	4.5	2.7
CLST133367 KEGG:K03531,TIGR:TIGR00065,COG:COG0206 Cell division GTPase	0	2.4	0	0	0	0	0	0	0	0	0	0	0	0	0	2	0	0	0	0.9	0	0	0	0
CLST133396 PFAM:PF00378.13,TIGR:TIGR03210,KEGG:K01715,COG:COG1024,TIGR:TIGR02437 Enoyl-CoA hydratase/carnithine racemase	23.4	11.8	13.3	11.3	0	0	0	0	0	0	0	0	4	3.2	0	0	23.6	16.9	12.6	14.5	0	0	0	0
CLST133580 KEGG:K02982,TIGR:TIGR01009,COG:COG0092 Ribosomal protein S3	0	0	0	0	0	0	0	0	0	0	0	0	0	0	0	0	0	0	0	0	0	0	0	0.9
CLST133706 NOG:NOG124709,NOG:NOG75757 Receptor	0	0	0	4.1	0	0	0	0	0	0	0	0	0	0	0	1	0	0	0	0	0	0	0	0
CLST133832 COG:COG0272,KEGG:K01972,TIGR:TIGR00575 NAD-dependent DNA ligase (contains BRCT domain type II)	0	0	0	0	0	0	0	0	0	1.8	0	0	0	0	0	0	0	0	0	0	0	0	0	0
CLST133858 TIGR:TIGR01169,COG:COG0081,KEGG:K02863 Ribosomal protein L1	8.5	10.6	1	0	0	0	1	4	1.8	0	0	0	0	0	0	0	0	0	3.6	4.5	0	0	0	0
CLST133904 hypothetical protein	0	0	0	0	0	0	0	0	0	0	0	0	0	3.2	0	0	0	0	0	0	0	0	0	0
CLST133934 KEGG:K00262,PFAM:PF02812.11,COG:COG0334,PFAM:PF00208.14 Glutamate dehydrogenase/leucine dehydrogenase	0	0	0	0	0.9	0	2	0	0	0	0	0	0	0	0	0	0	0	0	0	0	0	0	0
CLST133994 KEGG:K02994,COG:COG0096,PFAM:PF00410.12 Ribosomal protein S8	0	0	0	0	0	0	0	4.9	0	0	3.3	0	0	0	0	0	0	0	0	0	0	0	0	0
CLST134123 PFAM:PF01512.10,COG:COG1145,KEGG:K00335,PFAM:PF10589.2,KEGG:K05587,TIGR:TIGR02512,COG:COG1894,TIGR:TIGR01959,PFAM:PF00037.20 Ferredoxin	0	2.4	2	2.1	1.8	0	0	0	0	0	0	0	0	0	0	0	0	0	3.6	0	0	0	0	0
CLST134381 KEGG:K01868,TIGR:TIGR00418,COG:COG0441 Threonyl-tRNA synthetase	3.2	2.4	0	0	0	0	0	0	0	0	0	0	0	0	0	0	0	0	1.8	2.7	0	0	2.7	5.3
CLST134432 COG:COG0098,KEGG:K02988,TIGR:TIGR01021 Ribosomal protein S5	13.8	5.9	0	0	0	0	3	0	0	0	0	0	0	0	0	0	0	0	4.5	8.2	0	0	0.9	0.9
CLST134450 COG:COG0203,TIGR:TIGR00059,KEGG:K02879 Ribosomal protein L17	0	0	0	0	0	0	2	0	3.7	6.4	0	0	0	0	0	0	0	0	0	0	0	0	0	0
CLST134472 PFAM:PF00593.17 hypothetical protein	0	0	0	0	0	0	0	0	0	0	0	0	0	0	0	1	0	0	0	0	0	0	0	0
CLST134525 NOG:NOG81174,KEGG:K00945 Protein involved in pyrimidine metabolism	0	0	2	1	0	0	0	0	0	0	0	0	0	0	0	0	0	0	0	0	0	0	0	0
CLST134679 KEGG:K02892,PFAM:PF00276.13,COG:COG0089 Ribosomal protein L23	2.1	5.9	2	4.1	0	0	0	0	0	0	0	0	0	0	0	0	0	0	0	0	0	0	0	0
CLST134950 COG:COG0458,PFAM:PF02786.10,TIGR:TIGR01369,KEGG:K01955 Carbamoylphosphate synthase large subunit (split gene in MJ)	2.1	2.4	0	0	0	0	0	0	0	0	0	0	0	0	0	0	0	0	0	0	0	0	0	0
CLST134966 TIGR:TIGR01251,COG:COG0462,KEGG:K00948 Phosphoribosylpyrophosphate synthetase	0	0	0	0	0	0	0	0	0	0	0	0	2	0	0	0	0	0	0	0	0	0	0	0
CLST135584 TIGR:TIGR01044,KEGG:K02890,COG:COG0091 Ribosomal protein L22	0	0	0	0	0	0	0	0	11.9	7.3	0	0	0	0	0	0	0	0	0	0	0	0	0	0
CLST135597 COG:COG1653,KEGG:K02027 ABC-type sugar transport system, periplasmic component	0	0	0	0	2.7	1.8	0	2	0	0	0	3.3	0	0	0	0	0	0	0	0	0	0	0	1.8
CLST135759 PFAM:PF00390.12,KEGG:K00027,COG:COG0281,PFAM:PF03949.8 Malic enzyme	2.1	2.4	0	0	2.7	3.6	0	0	0	2.7	0	0	0	0	0	0	0	0	0	0	0	0	0	0
CLST135857 PFAM:PF00890.17,KEGG:K07137,COG:COG2509 Uncharacterized FAD-dependent dehydrogenases	3.2	2.4	0	0	0	0	0	0	0	0	0	0	0	0	0	0	0	0	0	0	0	0	0	1.8
CLST136006 COG:COG2730,KEGG:K01179 Endoglucanase	2.1	0	0	0	0	0	0	0	0	0	0	0	0	0	0	0	0	0	0	0	0	0	0	0
CLST136019 COG:COG0088,KEGG:K02926,PFAM:PF00573.15 Ribosomal protein L4	4.2	0	6.1	0	4.5	10	0	0	1.8	1.8	7.7	14.5	5	4.3	1	2	2.3	0	10.8	10	0	0	5.4	0
CLST136024 PFAM:PF11175.1,NOG:NOG70532 Annotation not available	2.1	0	0	0	0	0	0	0	0	0	0	0	0	0	0	0	0	0	0	0	0	0	0	0
CLST136672 NOG:NOG69778 Annotation not available	0	0	0	0	0	0	0	0	0	0	0	0	0	0	0	0	0	0	0	0	0	0	0	1.8
CLST136679 hypothetical protein	0	0	0	0	0	0	0	0	0	0	0	2.2	0	0	0	0	0	0	0	0	0	0	0	0
CLST136806 COG:COG0274,TIGR:TIGR00126,KEGG:K01619 Deoxyribose-phosphate aldolase	2.1	0	0	0	0	0	0	0	0	0	0	0	0	0	0	0	0	0	0	0	0	0	0	0
CLST136982 TIGR:TIGR01179,KEGG:K01784,COG:COG1087 UDP-glucose 4-epimerase	0	0	4.1	0	0	0	0	0	0	0	0	0	0	0	0	0	0	0	0	0	0	0	0	0
CLST137050 KEGG:K00925,TIGR:TIGR00016,COG:COG0282 Acetate kinase	11.7	20.1	4.1	8.2	0	0	0	0	0	0	0	0	0	0	0	0	0	0	9.9	7.2	0	0	7.2	8
CLST137075 COG:COG0150,KEGG:K01933,TIGR:TIGR00878 Phosphoribosylaminoimidazole (AIR) synthetase	5.3	2.4	0	0	0	0	2	2	0	0	0	0	0	0	0	0	0	0	0	3.6	0	0	0	0
CLST137171 COG:COG0098,KEGG:K02988,TIGR:TIGR01021 Ribosomal protein S5	0	0	0	0	0	0	0	0	1.8	1.8	0	0	0	0	0	0	0	0	0	0	0	0	0	0
CLST137371 COG:COG0393,PFAM:PF01906.10 Uncharacterized conserved protein	0	0	0	0	0	0	0	0	0	0	7.7	10	3	0	0	0	0	0	0	0	0	0	0	0
CLST137454 PFAM:PF00378.13,KEGG:K01715,COG:COG1024 Enoyl-CoA hydratase/carnithine racemase	17	23.6	0	0	0	0	0	0	0.9	0	0	0	0	0	0	0	0	0	8.1	8.2	0	0	9	8.9
CLST137817 TIGR:TIGR00458,TIGR:TIGR00499,COG:COG0017,TIGR:TIGR00457,KEGG:K01876,TIGR:TIGR00459,PFAM:PF00152.13 Aspartyl/asparaginyl-tRNA synthetases	3.2	0	0	0	0	0	0	0	0	0	0	0	0	0	0	0	0	0	0	0	0	0	0	0
CLST137847 COG:COG0448,KEGG:K00975,TIGR:TIGR02092,TIGR:TIGR02091 ADP-glucose pyrophosphorylase	0	0	0	0	0	0	0	3	0	0	0	0	0	0	0	0	0	0	0	0	0	0	0	0
CLST137871 NOG:NOG81375 Receptor	0	0	0	0	0	0	0	0	0	0	0	0	2	0	0	0	0	0	0	0	0	0	0	0
CLST138053 hypothetical protein	0	0	0	0	0	0.9	0	0	0	0	0	0	0	0	0	0	0	0	0	0	0	0	0	0
CLST138096 PFAM:PF09579.3 hypothetical protein	0	0	3.1	0	0	0	0	0	0	0	2.2	0	0	0	0	0	0	0	0	0	0	0	0	0
CLST138231 COG:COG0098,KEGG:K02988,TIGR:TIGR01021 Ribosomal protein S5	0	0	0	0	0	0	0	0	0	0	0	0	0	0	0	0	2.3	0	0	0	0	0	0	0
CLST138237 PFAM:PF05025.6,KEGG:K02431,COG:COG4154 Fucose dissimilation pathway protein FucU	0	0	0	0	1.8	0	0	0	0	0	4.4	5.6	0	0	0	0	0	0	0	0	0	0	0	0
CLST138326 KEGG:K01190,COG:COG3250,PFAM:PF02836.10 Beta-galactosidase/beta-glucuronidase	4.2	0	0	0	0	0	0	0	0	0	0	0	0	0	0	0	1.1	0	0	0	0	0	0	0
CLST138648 KEGG:K02992,TIGR:TIGR01029,COG:COG0049 Ribosomal protein S7	0	0	0	0	0	0	4	4.9	0	0	2.2	0	0	0	0	0	0	1.1	0	0	0	0	0	0
CLST138721 TIGR:TIGR00855,KEGG:K02935,COG:COG0222 Ribosomal protein L7/L12	7.4	16.5	0	0	0	0	0	0	0	0	0	0	0	0	0	0	0	0	0	0	0	0	0	0
CLST138791 PFAM:PF00162.12,COG:COG0126,KEGG:K00927 3-phosphoglycerate kinase	0	0	0	0	0	0	0	0	0	0	1.1	2.2	0	0	0	0	0	0	0	0	0	0	2.7	0
CLST138832 NOG:NOG81174,KEGG:K00945 Protein involved in pyrimidine metabolism	2.1	0	0	0	0	0	0	0	0	0	0	0	0	0	0	0	0	0	0	0	0	0	0	0
CLST138852 KEGG:K03650,COG:COG0486,TIGR:TIGR00450 Predicted GTPase	0	0	0	0	0	0	0	0	0	0	0	0	0	1.1	0	0	0	0	0	0	0	0	0	0
CLST138883 TIGR:TIGR01171,COG:COG0090,KEGG:K02886 Ribosomal protein L2	0	0	2	3.1	0	0	0	0	0	0	0	1.1	0	0	0	0	0	0	9	5.4	0	0	2.7	1.8
CLST139025 COG:COG0459,KEGG:K04077,TIGR:TIGR02348 Chaperonin GroEL (HSP60 family)	0	0	0	0	0	0	8.1	6.9	28.3	25.7	0	3.3	0	0	0	0	0	0	0	0	0	0	0	0
CLST139606 hypothetical protein	4.2	0	0	0	0	0	0	0	0	0	0	0	0	0	0	0	0	0	0	0	0	0	0	0
CLST139626 COG:COG3576,KEGG:K07006 Predicted flavin-nucleotide-binding protein structurally related to pyridoxine 5-phosphate oxidase	0	0	0	0	0	0	0	0	0	0	4.4	4.5	0	0	0	0	0	0	0	0	0	0	0	0
CLST139713 hypothetical protein	0	0	0	0	0	0	0	0	0	0	0	0	4	6.4	0	0	0	0	0	0	0	0	0	0
CLST139938 KEGG:K00939,TIGR:TIGR01351,COG:COG0563 Adenylate kinase and related kinases	0	0	0	0	0.9	0.9	0	0	0	0	0	0	0	0	0	0	0	0	1.8	3.6	0	0	0	0
CLST140916 KEGG:K07335,COG:COG1744 Uncharacterized ABC-type transport system, periplasmic component/surface lipoprotein	0	0	0	0	0	0	0	0	0	1.8	0	0	0	0	0	0	0	0	0	0	0	0	0	0
CLST141015 KEGG:K01756,TIGR:TIGR00928,COG:COG0015 Adenylosuccinate lyase	0	0	0	0	0	0	0	0	0	0	0	0	0	0	0	0	0	0	3.6	4.5	0	0	0	0
CLST141152 COG:COG4822,KEGG:K02190,PFAM:PF06180.4 Cobalamin biosynthesis protein CbiK, Co2+ chelatase	0	0	0	0	0	0	0	0	0	0	0	0	0	0	0	0	0	0	3.6	0	0	0	0.9	1.8
CLST141430 KEGG:K04043,COG:COG0443,TIGR:TIGR02350 Molecular chaperone	0	0	0	0	0	0	0	0	0	0	0	0	0	0	0	0	0	0	0	0	0	0	0	1.8
CLST141491 TIGR:TIGR00060,COG:COG0256,KEGG:K02881 Ribosomal protein L18	0	0	0	0	0	0	0	0	0	0	0	0	0	0	0	1	0	0	0	0	0	0	0	0
CLST141827 hypothetical protein	0	0	0	0	0	0	0	0	0	2.7	0	0	0	0	0	0	0	0	0	0	0	0	0	0
CLST142155 NOG:NOG138659 Annotation not available	0	0	0	0	0	0	0	0	0	0	0	0	0	0	5.2	5.1	0	0	1.8	3.6	0	0	0	0
CLST142313 KEGG:K02968,TIGR:TIGR00029 S20: ribosomal protein S20	0	2.4	0	0	0	0	0	0	0	0	0	0	0	0	0	0	0	0	0	0	0	0	0	0
CLST142441 COG:COG0448,KEGG:K00975,TIGR:TIGR02092 ADP-glucose pyrophosphorylase	6.4	4.7	5.1	0	0	0	0	0	0	0	0	0	0	0	0	0	0	0	1.8	1.8	0	0	0	0
CLST142722 TIGR:TIGR01187,KEGG:K02032,TIGR:TIGR02769,TIGR:TIGR01186,TIGR:TIGR00972,TIGR:TIGR02315,TIGR:TIGR03258,TIGR:TIGR01727,COG:COG4608,TIGR:TIGR00968,TIGR:TIGR00960,TIGR:TIGR02770 ABC-type oligopeptide transport system, ATPase component	0	0	0	0	0	0	2	0	0	0	0	0	0	0	0	0	0	0	0	0	0	0	0	0
CLST143564 KEGG:K02056,COG:COG1129,TIGR:TIGR01288,KEGG:K10542,PFAM:PF00005.20,TIGR:TIGR02633 ABC-type sugar transport system, ATPase component	13.8	23.6	2	6.2	0	0	0	0	0	0	0	0	0	0	0	0	0	0	5.4	4.5	0	0	2.7	2.7
CLST143641 COG:COG1396,NOG:NOG42236,PFAM:PF01381.15 Annotation not available	0	0	0	0	0	0	0	0	0	0	0	0	0	0	0	0	0	0	0	0	0	0	3.6	4.4
CLST143823 COG:COG0246,KEGG:K00041 Mannitol-1-phosphate/altronate dehydrogenases	9.6	15.3	4.1	2.1	0	0	0	0	0	0	0	0	0	0	0	0	0	0	2.7	4.5	0	0	1.8	2.7
CLST143867 COG:COG0436,KEGG:K10206,TIGR:TIGR03542 Aspartate/tyrosine/aromatic aminotransferase	0	3.5	0	0	0	0	0	0	0	0	0	0	0	0	0	0	0	0	0	0	0	0	0	0
CLST143972 PFAM:PF10418.2,COG:COG0543,TIGR:TIGR02911 2-polyprenylphenol hydroxylase and related flavodoxin oxidoreductases	0	0	2	2.1	0	0	0	0	0	0	0	0	0	0	0	0	0	0	0	0	0	0	0	0
CLST143985 KEGG:K03527,COG:COG0539,KEGG:K02945,TIGR:TIGR00717,COG:COG0761,TIGR:TIGR00216,PFAM:PF00575.16,TIGR:TIGR03591 Ribosomal protein S1	6.4	8.3	0	0	0	0	0	0	0	0	0	0	0	0	0	0	0	0	3.6	5.4	0	0	0	0
CLST144260 COG:COG3968,PFAM:PF12437.1,KEGG:K01915 Uncharacterized protein related to glutamine synthetase	0	0	0	0	0	0	0	0	0	0	2.2	1.1	0	0	0	0	0	0	0.9	0.9	0	0	0	0
CLST144403 COG:COG0224,KEGG:K02115,TIGR:TIGR01146 F0F1-type ATP synthase, gamma subunit	4.2	0	0	0	0	0	0	0	0	0	0	0	0	0	0	0	0	0	0	0	0	0	0	0
CLST144516 KEGG:K09903,TIGR:TIGR02075,COG:COG0528 Uridylate kinase	4.2	3.5	0	0	0	0	0	0	0	0	0	0	0	0	0	0	0	0	0	0	0	0	0	0
CLST144699 TIGR:TIGR02095,COG:COG0297,KEGG:K00703 Glycogen synthase	0	0	2	4.1	0	0	0	0	0	0	0	0	0	0	0	0	0	0	0	0	0	0	0	0
CLST145077 hypothetical protein	0	0	0	2.1	0	0	0	0	0	0	0	0	0	0	0	0	0	0	0	0	0	0	0	0
CLST145123 KEGG:K02982,TIGR:TIGR01009,COG:COG0092 Ribosomal protein S3	0	0	0	0	0	0	0	0	0	0	0	0	0	0	0	0	0	0	1.8	3.6	0	0	0	0
CLST145409 COG:COG0012,KEGG:K06942,TIGR:TIGR00092,TIGR:TIGR00437 Predicted GTPase, probable translation factor	0	0	0	0	0	0	0	0	0	0	0	0	0	0	0	0	0	0	0.9	0	0	0	0	0
CLST145624 COG:COG2373 Large extracellular alpha-helical protein	0	0	0	0	0	0	0	0	0	0	0	0	0	0	0	0	0	0	2.7	3.6	0	0	0	0
CLST145709 hypothetical protein	0	0	3.1	2.1	0	0	0	0	0	0	0	0	0	0	0	0	0	0	0	0	6.3	12	0	0
CLST145719 COG:COG0041,KEGG:K01588,TIGR:TIGR01162 Phosphoribosylcarboxyaminoimidazole (NCAIR) mutase	3.2	4.7	0	7.2	0	0	0	0	0	0	0	0	0	0	0	0	0	0	0	0	0	0	0	0
CLST145788 hypothetical protein	0	0	0	0	0	0	0	0	0	0	0	0	5	8.5	0	0	0	0	0	0	0	0	0	0
CLST145880 hypothetical protein	0	0	0	0	0	0	0	0	0	0.9	0	0	0	0	0	0	0	0	0	0	0	0	0	0
CLST146089 KEGG:K10439 hypothetical protein	3.2	3.5	3.1	0	2.7	3.6	4	0	9.1	9.2	6.6	7.8	3	2.1	0	0	0	0	11.7	9.1	5.3	5.4	0	0
CLST146489 KEGG:K00549,COG:COG0620 Methionine synthase II (cobalamin-independent)	0	0	0	0	0	0	0	0	0	0	0	0	0	0	0	0	0	0	0.9	0	0	0	0	0
CLST146896 hypothetical protein	0	0	0	0	0	0	0	0	0	0	0	0	4	6.4	0	0	0	0	0	0	0	0	0	0
CLST147133 hypothetical protein	0	0	0	0	0	0	0	0	0	0	0	0	0	0	0	0	0	0	0	5.4	0	0	0	0
CLST147553 TIGR:TIGR01064,COG:COG0469,KEGG:K00873 Pyruvate kinase	0	0	0	0	0	0	0	0	0	0	0	0	0	0	0	0	0	0	0	0	3.2	0	0	0
CLST147877 COG:COG0088,KEGG:K02926,PFAM:PF00573.15 Ribosomal protein L4	0	0	0	0	2.7	4.5	0	0	0	0	0	0	0	0	0	0	0	0	0	0	0	1.1	0	0
CLST147944 TIGR:TIGR00382,COG:COG1219,KEGG:K03544 ATP-dependent protease Clp, ATPase subunit	0	0	0	0	0	0	2	0	0	0	0	0	0	0	0	0	0	0	0	0	0	0	0	0
CLST148488 PFAM:PF07980.4 hypothetical protein	0	0	0	0	0	0	0	0	0	0	0	0	0	4.3	0	0	0	0	0	0	0	0	0	0
CLST148798 PFAM:PF02073.8 hypothetical protein	2.1	0	0	0	0	0	0	0	0	0	0	0	0	0	0	0	0	0	0	0	0	0	0	0
CLST148950 TIGR:TIGR03458,COG:COG0427 Acetyl-CoA hydrolase	11.7	10.6	5.1	3.1	0	0	0	0	0	0	0	0	0	0	0	0	0	0	0	0	0	0	0	0
CLST149019 TIGR:TIGR00060,COG:COG0256,KEGG:K02881 Ribosomal protein L18	11.7	8.3	4.1	5.1	7.2	5.4	0	3	4.6	3.7	8.8	5.6	11	8.5	0	2	0	0	7.2	8.2	11.6	12	0	0
CLST149075 TIGR:TIGR01117 mmdA: methylmalonyl-CoA decarboxylase alpha subunit	10.6	9.4	0	0	0	0	0	0	0	0	0	0	0	0	0	0	0	0	1.8	2.7	0	0	0	0
CLST149179 hypothetical protein	0	0	0	0	0	0	0	0	0	0	0	0	10	12.8	0	0	0	0	0	0	0	0	0	0
CLST149350 NOG:NOG121677 Annotation not available	0	0	0	0	0	0	0	0	0	0	0	0	4	4.3	0	0	0	0	0	0	0	0	0	0
CLST149452 NOG:NOG114810 Receptor	0	0	0	0	0	0	0	0	0	0	0	0	0	2.1	0	0	0	0	0	0	0	0	0	0
CLST149630 hypothetical protein	0	0	0	0	0	0	0	0	0	0	0	0	0	0	0	0	0	0	0	0.9	0	0	0.9	0
CLST149686 KEGG:K12574,TIGR:TIGR00649,COG:COG0595 Predicted hydrolase of the metallo-beta-lactamase superfamily	0	2.4	5.1	5.1	0	0	0	0	0	0	0	0	0	0	0	0	0	0	0	0	0	0	0	0
CLST149779 TIGR:TIGR00398,TIGR:TIGR00399,KEGG:K01874,COG:COG0143,COG:COG0073 EMAP domain	0	2.4	7.2	5.1	0	0	0	0	0	0	0	0	2	0	0	0	0	0	0	0	0	0	0	0
CLST149784 KEGG:K10188,COG:COG1653 ABC-type sugar transport system, periplasmic component	13.8	17.7	15.4	11.3	2.7	2.7	3	3	1.8	0	15.4	12.3	3	4.3	0	0	0	4.2	10.8	5.4	6.3	2.2	0	0
CLST149822 COG:COG0213,TIGR:TIGR02644,KEGG:K00756 Thymidine phosphorylase	2.1	0	0	0	0	0	0	0	0	0	0	0	0	0	0	0	0	0	0	0	0	0	0	0
CLST149845 PFAM:PF00709.14,KEGG:K01939,COG:COG0104 Adenylosuccinate synthase	4.2	3.5	0	0	0	0	0	0	0	0	0	0	0	0	0	0	0	0	0	0	0	0	0	0
CLST149921 KEGG:K03531,TIGR:TIGR00065,COG:COG0206 Cell division GTPase	0	0	1	0	0	0	0	0	0	0	0	0	0	0	0	0	0	0	4.5	0.9	0	0	0	0
CLST150461 COG:COG0238,KEGG:K02963,PFAM:PF01084.13,TIGR:TIGR00165 Ribosomal protein S18	0	0	0	0	0	0	0	0	2.7	0	0	0	0	0	0	0	0	0	0	0	0	0	0	0
CLST150526 hypothetical protein	2.1	0	0	0	0	0	0	0	0	0	0	0	0	0	0	0	0	0	0	0	0	0	0	0
CLST150614 KEGG:K03545,TIGR:TIGR00115,COG:COG0544 FKBP-type peptidyl-prolyl cis-trans isomerase (trigger factor)	3.2	0	0	0	1.8	0	0	0	2.7	0	3.3	0	0	0	0	0	0	0	5.4	4.5	0	0	0	0
CLST151102 COG:COG0031,TIGR:TIGR01139,KEGG:K01738,TIGR:TIGR01136 Cysteine synthase	0	0	0	0	0	0	0	1	0	0	0	0	0	0	0	0	0	0	0	0	0	0	0	0
CLST151281 hypothetical protein	5.3	4.7	0	0	0	0	0	0	0	0	0	0	0	0	0	0	0	0	0	0	0	0	0	0
CLST151313 TIGR:TIGR00115 tig: trigger factor	2.1	0	0	0	0	0	0	0	0	0	0	0	0	0	0	0	0	0	0	0	0	0	0	0
CLST151410 hypothetical protein	0	0	0	0	0	0	0	0	0	0	0	0	0	0	0	0	0	0	0	0.9	0	0	0	0
CLST151530 COG:COG0203,TIGR:TIGR00059,KEGG:K02879 Ribosomal protein L17	0	0	0	0	0	0	0	0	0	0	0	0	0	0	0	0	0	0	0	0.9	0	0	0	0
CLST151599 KEGG:K02956,TIGR:TIGR00952,COG:COG0184 Ribosomal protein S15P/S13E	0	0	0	0	0	0	0	0	0	0	0	0	0	0	0	0	0	0	0.9	1.8	0	0	0	0
CLST151936 TIGR:TIGR00057,KEGG:K07566,PFAM:PF03481.6,COG:COG0009 Putative translation factor (SUA5)	0	0	0	0	0	0	0	0	0	0	0	0	0	0	0	0	0	0	0	0	0	1.1	0	0
CLST151973 TIGR:TIGR00392,COG:COG0060,PFAM:PF06827.7,KEGG:K01870 Isoleucyl-tRNA synthetase	4.2	2.4	0	0	0	0	0	0	0	0	0	0	0	0	0	0	0	0	0	0	0	0	0	0
CLST151996 TIGR:TIGR00422,KEGG:K01873,COG:COG0525,PFAM:PF10458.2 Valyl-tRNA synthetase	0	0	0	0	0	0	0	0	0	0	0	0	0	0	0	0	0	0	0.9	0	0	0	0	0
CLST152146 COG:COG0722,TIGR:TIGR00034,KEGG:K01626 3-deoxy-D-arabino-heptulosonate 7-phosphate (DAHP) synthase	0	0	0	1	0	0	0	0	0	0	0	0	0	0	0	0	0	0	0	0	0	0	0	0
CLST152319 TIGR:TIGR03121,KEGG:K00200,COG:COG1229 Formylmethanofuran dehydrogenase subunit A	0	0	0	0	0	0	0	0	0	0	0	0	0	0	0	0	0	0	0	0	0	0	2.7	1.8
CLST152388 hypothetical protein	0	1.2	0	0	0	0	0	0	0.9	0	0	0	0	0	0	0	0	0	0	0	0	0	0	0
CLST152469 TIGR:TIGR01235,TIGR:TIGR01108,KEGG:K01606,COG:COG0511 Biotin carboxyl carrier protein	4.2	8.3	0	0	0	0	0	0	0	0	0	0	0	0	0	0	0	0	0	0	0	0	0.9	4.4
CLST152642 hypothetical protein	0	0	0	0	0	0.9	0	0	0	0	0	0	0	0	0	0	0	0	0	0	0	0	0	0
CLST152671 COG:COG4577,PFAM:PF00936.12 Carbon dioxide concentrating mechanism/carboxysome shell protein	0	0	0	0	0	0	0	0	0	0	2.2	2.2	0	0	0	0	0	0	0	0	0	0	0	0
CLST152699 COG:COG0436,KEGG:K10907,TIGR:TIGR01264,TIGR:TIGR01265 Aspartate/tyrosine/aromatic aminotransferase	0	0	2	0	0	0	0	0	0	0	0	0	0	0	0	0	0	0	0	0	0	0	0	0
CLST152842 COG:COG0166,KEGG:K01810 Glucose-6-phosphate isomerase	0	0	0	0	0	0	0	0	0	0	0	0	0	0	0	0	0	0	0	1.8	0	0	0	0
CLST153010 KEGG:K01653,TIGR:TIGR00119,COG:COG0440 Acetolactate synthase, small (regulatory) subunit	0	0	0	4.1	0	0	0	0	0	0	0	0	0	0	0	0	0	0	0	0	0	0	0	0
CLST153471 COG:COG1653 ABC-type sugar transport system, periplasmic component	27.6	40.1	8.2	4.1	0	0	0	0	0	0	0	0	0	0	0	0	0	0	1.8	1.8	0	0	0	0
CLST153584 COG:COG1629,NOG:NOG148246 Receptor	23.4	14.2	0	0	0	0	0	0	0	0	0	0	0	0	7.2	9.1	0	0	9.9	7.2	0	0	0	0
CLST153597 TIGR:TIGR01308,NOG:NOG148997,KEGG:K02907 Annotation not available	0	0	0	0	0	0	0	0	2.7	3.7	4.4	3.3	0	0	0	0	0	0	0	0	0	0	0	0
CLST153689 COG:COG0205,TIGR:TIGR02482,KEGG:K00850 6-phosphofructokinase	0	0	0	0	0.9	0.9	0	0	0	0	0	0	0	0	0	0	0	0	0	0	0	2.2	0	0
CLST154227 NOG:NOG133096 Receptor	0	0	0	0	0	0	0	0	0	0	0	0	0	0	0	0	0	0	0	0	0	3.3	0	0
CLST154332 COG:COG0244,KEGG:K02864 Ribosomal protein L10	0	0	0	0	0	0	0	0	0	0	0	0	0	0	0	0	0	0	1.8	0.9	0	0	0	0
CLST154358 KEGG:K01788,COG:COG3010,PFAM:PF04131.7 Putative N-acetylmannosamine-6-phosphate epimerase	4.2	3.5	0	0	0	0	0	0	0	0	0	0	0	0	0	0	0	0	0	0	0	0	0	0
CLST154668 NOG:NOG133096,NOG:NOG124709,NOG:NOG125883 Receptor	4.2	8.3	0	0	0	0	0	0	0	0	0	0	0	0	0	1	0	0	1.8	0	0	0	0	0
CLST154687 KEGG:K07567,TIGR:TIGR00004,COG:COG0251 Putative translation initiation inhibitor, yjgF family	0	0	2	2.1	9.9	12.7	0	0	0	2.7	7.7	8.9	11	10.7	0	2	2.3	2.1	0	3.6	2.1	0	0	0
CLST154838 COG:COG1077,KEGG:K03569,TIGR:TIGR00904 Actin-like ATPase involved in cell morphogenesis	2.1	2.4	0	0	0	0	0	0	0	0	0	0	0	0	0	0	0	0	0	0	0	0	0	0
CLST155077 COG:COG3444,TIGR:TIGR00854,KEGG:K02745 Phosphotransferase system, mannose/fructose/N-acetylgalactosamine-specific component IIB	0	0	0	0	0	0	0	0	2.7	4.6	0	0	0	0	0	0	0	0	0	0	0	0	0	0
CLST156191 TIGR:TIGR01830,KEGG:K00059,COG:COG1028 Dehydrogenases with different specificities (related to short-chain alcohol dehydrogenases)	0	0	0	0	0	0	0	0	0	0	0	0	0	0	0	0	0	0	0	0	0	0	0.9	0
CLST156238 hypothetical protein	0	0	0	0	0	0	0	0	0	0	0	0	0	0	0	0	0	0	0	0	3.2	2.2	0	0
CLST156249 COG:COG0426 Uncharacterized flavoproteins	0	0	2	0	0	0	0	0	0	0	0	0	0	0	0	0	0	0	0	0	0	0	0	0
CLST156338 COG:COG1881,KEGG:K06910,TIGR:TIGR00481 Phospholipid-binding protein	0	0	0	0	0	0	0	0	0	0	2.2	0	0	0	0	0	0	0	0	0	0	0	0	0
CLST156378 TIGR:TIGR01003,PFAM:PF00381.12,KEGG:K11189,COG:COG1925 Phosphotransferase system, HPr-related proteins	0	0	0	0	0	0	0	0	0	0	0	0	0	0	0	0	0	0	0	3.6	0	0	0	0
CLST156508 COG:COG0012,KEGG:K06942,TIGR:TIGR00092 Predicted GTPase, probable translation factor	0	0	0	2.1	0	0	0	0	0	0	0	0	0	0	0	0	0	0	0	0	0	0	0	0
CLST156705 TIGR:TIGR00224,KEGG:K01610,COG:COG1866 Phosphoenolpyruvate carboxykinase (ATP)	0	0	0	0	0	0	0	0	0	0	0	0	0	0	0	0	0	0	0	0	0	0	0	1.8
CLST157068 KEGG:K02933,COG:COG0097,TIGR:TIGR03654 Ribosomal protein L6P/L9E	4.2	3.5	2	3.1	0	0	0	0	0	0	0	0	0	0	0	0	0	0	0	0	0	0	0	0
CLST157284 TIGR:TIGR00576,KEGG:K01520,COG:COG0756 dUTPase	0	0	0	0	0	0	0	0	0	1.8	0	0	0	0	0	0	0	0	0	0	0	0	0	0
CLST157922 KEGG:K10108,COG:COG2182 Maltose-binding periplasmic proteins/domains	19.1	13	0	0	3.6	3.6	0	0	0	0	19.7	26.8	0	0	0	0	0	0	0	0	0	0	0	0
CLST158027 NOG:NOG113320 Receptor	0	0	0	0	0	0	0	0	0	0	0	0	0	0	3.1	0	0	0	0	0	0	0	0	0
CLST158053 KEGG:K02026,COG:COG0395 ABC-type sugar transport system, permease component	0	0	4.1	4.1	0	0	0	0	0	0	4.4	3.3	5	0	0	0	2.3	4.2	0	0	0	0	0	0
CLST158160 hypothetical protein	0	0	0	0	0	0	0	0	2.7	6.4	0	0	0	0	0	0	0	0	0	0	0	0	0	0
CLST159322 hypothetical protein	0	0	0	0	0	0	0	0	0	0	0	0	0	0	2.1	2	0	0	0	0	0	0	0	0
CLST159430 hypothetical protein	2.1	0	0	0	0	0	0	0	0	0	0	0	0	0	0	0	0	0	0	0	0	0	0	0
CLST159484 hypothetical protein	0	1.2	0	0	0	0	0	0	0	0	0	0	0	0	0	0	0	0	0	0	0	0	0	0
CLST159511 PFAM:PF06205.4,PFAM:PF06165.4,KEGG:K00702,PFAM:PF06204.4,COG:COG3459 Cellobiose phosphorylase	0	0	0	0	0	0	0	0	0	0	0	0	0	0	0	0	0	0	1.8	1.8	0	0	1.8	0
CLST159808 hypothetical protein	0	0	0	0	0	0.9	0	0	0	0	0	0	0	0	0	0	0	0	0	0	0	0	0	0
CLST160046 PFAM:PF05816.4,COG:COG3853 Uncharacterized protein involved in tellurite resistance	5.3	8.3	0	2.1	0	0	0	0	0	0	0	0	0	0	0	0	0	0	0	2.7	0	0	0	0
CLST160205 COG:COG1109,PFAM:PF02878.9,KEGG:K01840,PFAM:PF02879.9 Phosphomannomutase	0	0	0	0	0	0	0	0	0	0	0	0	0	0	0	0	0	0	0.9	0	0	0	0	0
CLST160237 PFAM:PF06204.4,COG:COG3459 Cellobiose phosphorylase	0	0	0	2.1	0	0	0	0	0	0	0	0	0	1.1	0	0	0	1.1	0	0	0	0	0	0
CLST160241 hypothetical protein	4.2	7.1	2	0	0	0	0	0	0	0	0	0	0	0	0	0	0	0	0	0	0	0	0	0
CLST160496 NOG:NOG114077 Annotation not available	0	0	0	0	0	0	0	0	0	0	0	0	0	0	0	0	0	0	0	0	2.1	3.3	0	0
CLST160504 hypothetical protein	0	0	0	0	0	0	0	0	0	0	0	0	0	0	1	0	0	0	0	0	0	0	0	0
CLST160698 COG:COG0244,KEGG:K02864,PFAM:PF00466.13 Ribosomal protein L10	0	0	0	0	0	0	0	0	0	0	2.2	3.3	0	0	0	0	0	0	7.2	0	2.1	0	0	0
CLST160736 hypothetical protein	0	0	0	1	0	0	0	0	0	0	0	0	0	0	3.1	2	0	0	0	0	0	0	0	0
CLST160885 COG:COG3937 Uncharacterized conserved protein	3.2	3.5	3.1	4.1	0	2.7	5	6.9	19.2	13.7	14.3	11.2	0	0	0	0	81.1	63.3	0	0	0	0	0	0
CLST161086 hypothetical protein	0	0	0	0	0	0	0	0	1.8	0	0	0	0	0	0	0	0	0	0	0	0	0	0	0
CLST161292 TIGR:TIGR03635,KEGG:K02961,COG:COG0186 Ribosomal protein S17	0	0	0	0	0	0	0	0	2.7	3.7	0	0	0	0	0	0	0	0	0	0	0	0	0	0
CLST161482 PFAM:PF00464.12,KEGG:K00600,COG:COG0112 Glycine/serine hydroxymethyltransferase	1.1	3.5	0	0	0	0	0	0	0	0	0	0	0	0	0	0	0	0	0	0	0	0	0	0
CLST162033 hypothetical protein	3.2	0	0	0	0	0	0	0	0	0	0	0	0	0	0	0	0	0	4.5	5.4	0	0	0	0
CLST162253 COG:COG1236,PFAM:PF07521.5,TIGR:TIGR03675,KEGG:K07576 Predicted exonuclease of the beta-lactamase fold involved in RNA processing	0	0	0	1	0	0	0	0	0	0	0	0	0	0	0	0	0	0	0	0	0	0	0	0
CLST162630 PFAM:PF03830.8,PFAM:PF03610.9,KEGG:K02794,COG:COG2893 Phosphotransferase system, mannose/fructose-specific component IIA	0	0	0	0	0	0	0	0	0	0.9	0	0	0	0	0	0	0	0	0	0	0	0	0	0
CLST163093 COG:COG1609,PFAM:PF00356.14 Transcriptional regulators	0	0	0	0	0	0	0	0	0	0	0	0	0	0	0	0	0	0	0	0	0	0	1.8	0
CLST163174 KEGG:K10254,PFAM:PF06100.4,COG:COG4716 Myosin-crossreactive antigen	9.6	3.5	0	0	0	0	0	0	0	0	0	0	0	0	0	0	0	0	0	0	0	0	0	0
CLST163312 NOG:NOG85156 Receptor	5.3	3.5	0	0	0	0	0	0	0	0	0	0	0	0	0	0	0	0	6.3	10	22.2	17.4	3.6	5.3
CLST163390 KEGG:K02990,PFAM:PF01250.10 hypothetical protein	0	0	0	2.1	0	0	0	0	0	0	0	0	0	0	0	0	0	0	0.9	4.5	0	0	0	0
CLST163812 hypothetical protein	3.2	2.4	0	0	0	0	0	0	0	0	0	0	0	0	0	0	0	0	0	0	0	0	0	0
CLST163982 NOG:NOG133477,NOG:NOG85156 Receptor	0	0	0	0	0	0	0	0	0	0	0	0	0	0	0	0	0	0	9	7.2	0	0	0	0
CLST164139 TIGR:TIGR01307,COG:COG0696,KEGG:K01834 Phosphoglyceromutase	0	0	8.2	2.1	0	0	0	0	0	0	0	0	0	0	0	0	0	0	1.8	0	0	0	0	0
CLST164611 hypothetical protein	0	0	0	0	0	0	0	0	0	0	0	0	0	2.1	0	0	0	0	0	0	0	0	0	0
CLST164903 KEGG:K02469,TIGR:TIGR01063,COG:COG0188 Type IIA topoisomerase (DNA gyrase/topo II, topoisomerase IV), A subunit	2.1	0	0	0	0	0	0	0	0	0	0	0	0	0	0	0	0	0	0	0	0	0	0	1.8
CLST165006 KEGG:K07030,COG:COG1461,TIGR:TIGR03599 Predicted kinase related to dihydroxyacetone kinase	4.2	0	0	0	0	0	0	0	0	0	0	0	0	0	0	0	0	0	0	3.6	0	0	0	0.9
CLST165028 NOG:NOG125711 Annotation not available	12.7	11.8	0	0	0	0	0	0	0	0	0	0	0	0	2.1	5.1	0	0	25.2	18.1	0	0	0	0
CLST165312 KEGG:K03088 hypothetical protein	0	0	0	0	0	0	0	0	0	0	0	0	0	0	0	0	0	0	0	0	0	0	1.8	0
CLST165327 KEGG:K01006,TIGR:TIGR01828,COG:COG0574 Phosphoenolpyruvate synthase/pyruvate phosphate dikinase	1.1	0	0	0	0	0	0	0	0	0	0	0	0	0	0	0	0	0	0	0.9	0	0	0	0
CLST165938 TIGR:TIGR03259,COG:COG4057,KEGG:K00402 Methyl coenzyme M reductase, gamma subunit	0	0	0	0	0	0	0	0	0	0	0	0	0	0	0	0	0	0	0	0	0	0	16.1	18.7
CLST166211 COG:COG2986,KEGG:K01745,TIGR:TIGR01225 Histidine ammonia-lyase	0	0	2	3.1	0	0	0	0	0	0	0	0	5	10.7	0	2	0	0	0	0	0	0	0	0
CLST166344 COG:COG0710,TIGR:TIGR01093,KEGG:K03785 3-dehydroquinate dehydratase	0	0	0	3.1	0	0	0	0	0	0	0	0	0	2.1	0	0	0	0	0	0	0	0	0	0
CLST166421 COG:COG1185,KEGG:K00962,TIGR:TIGR03591 Polyribonucleotide nucleotidyltransferase (polynucleotide phosphorylase)	0	0	0	0	0.9	0.9	0	0	0	0	0	0	0	0	0	0	0	0	4.5	3.6	0	0	0	0
CLST166654 COG:COG0366,TIGR:TIGR02456,KEGG:K05341 Glycosidases	2.1	0	0	0	0	0	0	0	0	0	0	0	0	0	0	0	0	0	0	0	0	0	0	0
CLST167204 KEGG:K02986,COG:COG0522,TIGR:TIGR01017 Ribosomal protein S4 and related proteins	7.4	7.1	0	0	1.8	2.7	0	0	1.8	0	0	0	0	0	0	0	0	0	0	0	0	0	6.3	2.7
CLST167342 KEGG:K02933,COG:COG0097,TIGR:TIGR03654 Ribosomal protein L6P/L9E	0	0	0	0	0.9	0.9	0	0	0	0	1.1	0	0	0	0	0	0	0	6.3	4.5	0	3.3	0	0
CLST167573 COG:COG0459,KEGG:K04077,TIGR:TIGR02348 Chaperonin GroEL (HSP60 family)	0	0	0	0	0.9	0	0	0	0	0	0	2.2	0	0	0	0	0	0	0	0	0	0	0	0
CLST167607 NOG:NOG86818 Annotation not available	7.4	9.4	4.1	4.1	0	0	0	0	0	0	0	0	0	0	0	0	0	0	0	0	37	30.5	2.7	3.6
CLST168218 PFAM:PF03830.8,KEGG:K02794,COG:COG3444 Phosphotransferase system, mannose/fructose/N-acetylgalactosamine-specific component IIB	0	0	0	0	0	0	0	3	9.1	8.2	0	0	0	0	0	0	0	0	0	0	0	0	0	0
CLST168675 PFAM:PF02421.11,COG:COG0370,KEGG:K04759,TIGR:TIGR00437 Fe2+ transport system protein B	0	0	0	0	0	0	0	0	0	0	0	0	0	0	0	0	0	0	2.7	3.6	0	0	0	0
CLST169054 hypothetical protein	4.2	4.7	0	0	0	0	0	0	0	0	0	0	0	0	0	0	0	0	0	0	0	0	0	0
CLST169186 hypothetical protein	2.1	0	0	0	0	0	0	0	0	0	0	0	0	0	0	0	0	0	0	0	0	0	0	0
CLST169302 NOG:NOG113320,NOG:NOG79278 Receptor	1.1	0	0	0	0	0	0	0	0	0	0	0	0	0	0	0	0	0	0	0	2.1	1.1	0	0
CLST169454 hypothetical protein	0	0	0	0	0	0	0	0	0	0	0	0	0	2.1	0	0	0	0	0	0	0	0	0	0
CLST169485 KEGG:K00262,PFAM:PF02812.11,COG:COG0334,PFAM:PF00208.14 Glutamate dehydrogenase/leucine dehydrogenase	0	0	0	0	0	0	0	0	0	0	0	1.1	5	10.7	0	0	0	0	0.9	0	0	0	0	0
CLST169733 hypothetical protein	0	0	0	0	0	0	0	0	0.9	0	0	0	0	0	0	0	0	0	0	0	0	0	0	0
CLST169807 NOG:NOG86956 Annotation not available	2.1	0	0	0	0	0	0	0	0	0	0	0	0	0	0	0	0	0	0	0	0	0	0	0
CLST169867 hypothetical protein	0	0	0	0	0	0	0	0	0	0	0	0	19	26.7	3.1	6.1	0	0	0	0	0	0	0	0
CLST169990 NOG:NOG69778 Annotation not available	4.2	2.4	0	0	0	0	0	0	0	0	0	0	0	0	0	0	0	0	5.4	6.3	20.1	15.2	12.6	10.7
CLST170709 hypothetical protein	0	0	0	0	1.8	0	0	0	0	0	0	0	0	0	0	0	10.1	10.6	0	0	0	0	0	0
CLST170810 hypothetical protein	2.1	4.7	0	0	0	0	0	0	0	0	0	0	0	0	0	0	0	0	1.8	0	0	0	0	0
CLST171188 TIGR:TIGR00487,KEGG:K02519,PFAM:PF04760.8,COG:COG0532 Translation initiation factor 2 (IF-2; GTPase)	1.1	2.4	0	0	0	0	0	0	0	0	0	0	0	0	0	0	0	0	0.9	0.9	0	0	0	0
CLST171978 hypothetical protein	0	0	0	11.3	0	0	0	0	0	0	0	0	0	18.2	2.1	5.1	0	0	0	0	0	0	0	0
CLST172009 hypothetical protein	1.1	0	0	0	0	0	0	0	0	0	0	0	0	0	0	0	0	0	0	0	0	0	0	0
CLST172623 KEGG:K01223,TIGR:TIGR03356,COG:COG2723 Beta-glucosidase/6-phospho-beta-glucosidase/beta-galactosidase	2.1	0	0	0	0	0	0	0	0	0	0	0	0	0	0	0	0	0	0	0	0	0	0	0
CLST172951 TIGR:TIGR01003,KEGG:K11189,COG:COG1925 Phosphotransferase system, HPr-related proteins	4.2	0	2	3.1	2.7	2.7	0	0	1.8	2.7	0	0	0	3.2	0	0	0	0	0	0	2.1	0	0	0
CLST173225 TIGR:TIGR02475,KEGG:K02234,PFAM:PF02492.12,COG:COG0523 Putative GTPases (G3E family)	0	2.4	0	0	0	0	0	0	0	0	0	0	0	0	0	0	0	0	0	0.9	0	0	0	0
CLST173604 KEGG:K03527,COG:COG0539,KEGG:K02945,TIGR:TIGR00717,COG:COG0761,TIGR:TIGR00216,PFAM:PF00575.16,TIGR:TIGR03591 Penicillin tolerance protein	1.1	0	2	4.1	0.9	0	0	0	0	0	2.2	1.1	0	0	1	0	0	0	0.9	1.8	0	2.2	0	0
CLST173720 NOG:NOG138875 Receptor	0	0	0	0	0	0	0	0	0	0	0	0	1	0	0	0	0	0	0	0	0	0	0	0
CLST173875 NOG:NOG130229 Annotation not available	0	0	0	0	0	0	0	0	0	0	0	0	1	0	0	0	1.1	0	0	0	0	0	0	0
CLST174133 COG:COG0264,KEGG:K02357,TIGR:TIGR00116 Translation elongation factor Ts	0	0	0	0	0	0	0	0	0	0.9	5.5	3.3	0	0	0	0	0	0	0	0	10.6	5.4	0	0
CLST174290 hypothetical protein	0	4.7	0	0	0	0	0	0	0	0	0	0	0	0	0	0	0	0	5.4	2.7	0	0	0	0
CLST174595 COG:COG0523 Putative GTPases (G3E family)	0	2.4	7.2	4.1	0	0	0	0	0	0	3.3	1.1	0	0	0	0	0	0	0	0	0	0	0	0
CLST174653 hypothetical protein	0	0	0	0	0	0	0	0	0	0	0	0	0	3.2	0	0	0	0	0	0	0	0	0	0
CLST174739 KEGG:K00634,COG:COG0280,TIGR:TIGR02706 Phosphotransacetylase	0	0	0	0	0	0	0	0	0	0	0	0	0	0	0	0	0	0	0	1.8	0	0	0	0
CLST174777 COG:COG0521,COG:COG2258 Molybdopterin biosynthesis enzymes	2.1	0	0	0	0	0	0	0	0	0	0	0	0	0	0	0	0	0	0	0	0	0	0	0
CLST174910 hypothetical protein	20.2	20.1	3.1	10.3	0	0	0	0	0	0	0	0	0	0	0	0	0	0	0	0	0	0	0	0
CLST174934 TIGR:TIGR01813,COG:COG1053,KEGG:K00244 Succinate dehydrogenase/fumarate reductase, flavoprotein subunit	4.2	3.5	0	0	0	0	0	0	0	0	0	0	0	0	0	0	0	0	0	0	0	0	0	0
CLST174942 PFAM:PF01645.10,COG:COG0069,PFAM:PF01493.12,PFAM:PF04898.7,PFAM:PF00310.14,KEGG:K00265,COG:COG0070,COG:COG0067 Glutamate synthase domain 2	0	0	4.1	0	0	0	0	0	0	0	0	0	0	0	0	0	0	0	1.8	0	0	0	0	0
CLST175084 COG:COG0462,KEGG:K00948 Phosphoribosylpyrophosphate synthetase	0	0	0	0	0	0	0	0	0	0	0	0	0	0	0	0	0	0	0	3.6	0	0	0	0
CLST175725 hypothetical protein	2.1	3.5	0	0	0	0	0	0	0	0	0	0	0	0	0	0	0	0	0	0	0	0	0	0
CLST175864 COG:COG0172,KEGG:K01875,TIGR:TIGR00414 Seryl-tRNA synthetase	0	0	0	0	0	0	0	0	0	0	0	0	0	0	0	0	0	0	0.9	0	0	0	0	0
CLST175974 COG:COG0235,KEGG:K01628 Ribulose-5-phosphate 4-epimerase and related epimerases and aldolases	13.8	13	4.1	3.1	5.4	2.7	7.1	5.9	4.6	4.6	6.6	6.7	0	0	4.1	2	0	2.1	7.2	6.3	0	2.2	0	0
CLST176159 KEGG:K03046,COG:COG0086,TIGR:TIGR02386 DNA-directed RNA polymerase, beta subunit/160 kD subunit	11.7	11.8	1	0	0	0	0	0	0	0	0	0	0	0	0	0	0	0	0	0	0	0	0.9	0
CLST176685 COG:COG0642,KEGG:K11357 Signal transduction histidine kinase	0	0	0	0	0	0	0	0	0	0	0	0	0	1.1	0	0	0	0	0	0	0	0	0	0
CLST176869 TIGR:TIGR00468,COG:COG0016,KEGG:K01889 Phenylalanyl-tRNA synthetase alpha subunit	0	2.4	0	0	0	0	0	0	0	0	0	0	0	0	0	0	0	0	0	0	0	0	0	0
CLST176884 KEGG:K04487,COG:COG1104,TIGR:TIGR03402 Cysteine sulfinate desulfinase/cysteine desulfurase and related enzymes	0	0	0	3.1	0	0	0	0	0	0	0	0	0	0	0	0	0	0	2.7	0	0	0	0	0
CLST177906 COG:COG0448,KEGG:K00975,TIGR:TIGR02091 ADP-glucose pyrophosphorylase	10.6	9.4	0	3.1	0	0	0	0	0	0	0	0	0	0	0	0	0	0	0	2.7	0	0	0.9	1.8
CLST178022 TIGR:TIGR00387,PFAM:PF01565.16,COG:COG0277,KEGG:K00104 FAD/FMN-containing dehydrogenases	0	0	0	0	0.9	0.9	0	0	0	0	0	0	0	0	0	0	0	0	0	0	0	0	0	0
CLST178307 TIGR:TIGR00855,KEGG:K02935 L12: ribosomal protein L7/L12	0	0	0	0	0	0	0	0	0	0	0	0	0	0	0	0	0	0	0	1.8	0	0	0	0.9
CLST178312 hypothetical protein	0	0	0	0	0	0	0	0	0	0	0	0	0	0	0	0	0	0	0	0	0	0	1.8	2.7
CLST178477 TIGR:TIGR02403,COG:COG0366,PFAM:PF00128.17,TIGR:TIGR02402,KEGG:K01234 Glycosidases	0	0	4.1	0	0	0	0	0	0	0	0	0	0	0	0	0	0	0	0	0	0	0	0	0
CLST178520 hypothetical protein	0	0	0	0	0	0	0	0	0	0	0	0	0	0	0	0	0	0	0	0	0	0	1.8	0.9
CLST178524 KEGG:K01041,TIGR:TIGR03458,COG:COG0427,KEGG:K01067 Acetyl-CoA hydrolase	0	0	0	0	0	0	0	0	0	0	0	0	0	0	0	0	0	0	0	0	10.6	5.4	0	0
CLST178614 hypothetical protein	0	0	0	0	0	0	0	0	0	0	0	0	0	1.1	0	0	0	0	0	0	0	0	0	0
CLST178888 COG:COG0268,KEGG:K02968,TIGR:TIGR00029 Ribosomal protein S20	0	0	0	0	0	0	0	0	2.7	3.7	0	0	0	0	0	0	0	0	0	0	0	0	0	0
CLST179424 NOG:NOG85156 Receptor	0	0	7.2	3.1	0	0	0	0	0	0	0	0	8	6.4	0	0	0	0	0	0	0	1.1	0	0
CLST179558 COG:COG0540,KEGG:K00609,TIGR:TIGR00670 Aspartate carbamoyltransferase, catalytic chain	0	2.4	0	0	0	0	0	0	0	0	0	0	0	0	0	0	0	0	0	0	0	0	0	0
CLST179940 hypothetical protein	0	0	0	0	0	0	0	0	0	0	0	0	0	0	2.1	3	0	0	0	0	0	0	0	0
CLST180530 NOG:NOG132485 Annotation not available	0	0	0	0	0	0	0	0	0	0	0	0	0	0	0	6.1	0	0	0	0	0	0	0	0
CLST180884 COG:COG0458,TIGR:TIGR01369,KEGG:K01955 Carbamoylphosphate synthase large subunit (split gene in MJ)	0	0	0	0	0	0	0	0	0	0	0	0	0	0	0	0	0	0	0	0	0	0	0.9	0
CLST181053 KEGG:K02986,COG:COG0522,TIGR:TIGR01017 Ribosomal protein S4 and related proteins	0	0	0	0	0	0	0	0	0	0	0	0	0	0	0	0	0	0	3.6	1.8	0	0	0	0
CLST181333 NOG:NOG133934 Annotation not available	0	2.4	0	0	0	0	0	0	0	0	0	0	0	0	0	0	0	0	0	0	0	0	0	0
CLST181360 TIGR:TIGR01783,NOG:NOG147378 Annotation not available	1.1	3.5	0	0	0	0	0	0	0	0	0	0	0	0	0	0	0	0	0	0	0	0	0	0
CLST181415 hypothetical protein	0	0	0	0	0	0	0	0	0	0	0	0	0	0	0	0	0	0	0.9	2.7	0	0	0	0
CLST181475 TIGR:TIGR00115 tig: trigger factor	0	0	0	0	0	0	0	0	0.9	0	0	0	0	0	0	0	0	0	0	0	0	0	0	0
CLST182109 COG:COG3874,TIGR:TIGR02874 Uncharacterized conserved protein	2.1	0	0	0	0	0	0	0	0	0	0	0	0	0	0	0	0	0	0	0	0	0	0	0
CLST182384 NOG:NOG85156 Receptor	3.2	2.4	0	0	0	0	0	0	0	0	0	0	0	0	0	0	0	0	0	0	0	0	0	0
CLST182415 hypothetical protein	0	0	5.1	3.1	0	0	0	0	0	0	0	0	5	5.3	6.2	4.1	0	0	0	0	0	0	0	0
CLST182673 NOG:NOG85156 Receptor	0	0	5.1	4.1	0	0	0	0	0	0	0	0	0	0	0	0	0	0	0	0	0	0	0	0
CLST182679 NOG:NOG79237 Annotation not available	0	0	0	0	0	0	0	0	0	0	0	0	0	2.1	0	0	0	0	0	0	0	0	0	0
CLST182885 PFAM:PF07980.4,NOG:NOG71722 Annotation not available	0	0	0	0	0	0	0	0	0	0	0	0	0	0	2.1	4.1	7.9	4.2	0	0	10.6	13.1	0	0
CLST182998 hypothetical protein	0	0	0	0	0	0	0	0	1.8	3.7	0	0	0	0	0	0	0	0	0	0	0	0	0	0
CLST183458 hypothetical protein	0	3.5	0	0	0	0	0	0	0	0	0	0	0	0	0	0	0	0	0	0	0	0	0	0
CLST184255 PFAM:PF02730.8,COG:COG2414 Aldehyde:ferredoxin oxidoreductase	10.6	28.3	0	0	0	0	0	0	0	0	0	0	0	0	0	0	0	0	0	0	0	0	0	0
CLST184405 TIGR:TIGR01049,COG:COG0051,KEGG:K02946 Ribosomal protein S10	0	0	0	0	0	0	0	0	0	0	0	0	0	0	0	0	0	0	2.7	0	0	0	0	0
CLST184474 COG:COG4822,KEGG:K02190,PFAM:PF06180.4 Cobalamin biosynthesis protein CbiK, Co2+ chelatase	5.3	7.1	2	2.1	0	0	4	0	7.3	1.8	0	4.5	4	5.3	0	0	0	0	8.1	6.3	0	2.2	2.7	0.9
CLST184535 hypothetical protein	0	0	0	1	0	0	0	0	0	0	0	0	0	0	0	0	0	0	0	0	0	0	0	0
CLST184593 NOG:NOG124709,NOG:NOG148246 Receptor	3.2	1.2	0	0	0	0	0	0	0	0	0	0	0	0	0	0	0	0	0	0	0	0	0	0
CLST184865 hypothetical protein	0	0	0	0	0	0	0	0	0	0	0	0	0	2.1	0	0	0	0	0	0	0	0	0	0
CLST185149 KEGG:K01443,TIGR:TIGR02318 phosphono_phnM: phosphonate metabolism protein PhnM	3.2	3.5	0	0	0	0	0	0	0	0	0	0	0	0	0	0	0	0	0	0	0	0	0	0
CLST185154 PFAM:PF03764.11,PFAM:PF00679.17,TIGR:TIGR00484,KEGG:K02355,COG:COG0480,TIGR:TIGR00490 Translation elongation factors (GTPases)	10.6	7.1	8.2	7.2	0	0	0	0	0	0	0	0	2	4.3	1	0	4.5	4.2	10.8	5.4	0	0	0	0
CLST185572 COG:COG1344,KEGG:K02406,PFAM:PF00700.14 Flagellin and related hook-associated proteins	0	0	0	0	0	0	0	0	0	0	0	0	0	0	0	0	0	0	0.9	1.8	0	0	0	0
CLST185867 TIGR:TIGR00855,KEGG:K02935 L12: ribosomal protein L7/L12	2.1	2.4	0	2.1	0	0	0	0	0	0	0	0	0	0	0	0	0	0	0	0	0	0	0	0
CLST186178 KEGG:K00048,TIGR:TIGR02638,COG:COG1454 Alcohol dehydrogenase, class IV	0	0	0	0	0	0	0	0	0.9	0	0	0	0	0	0	0	0	0	0	0	0	0	0	0
CLST186400 TIGR:TIGR02336,NOG:NOG26044,PFAM:PF09508.3 Annotation not available	2.1	0	1	0	0	0	0	0	0	0	0	0	0	0	0	0	0	0	0	0	0	0	0	0
CLST186509 KEGG:K01815,COG:COG3717 5-keto 4-deoxyuronate isomerase	3.2	0	0	3.1	0	0	0	0	0	0	0	0	0	0	0	0	0	0	0	0	0	0	0	0
CLST186512 KEGG:K00014,TIGR:TIGR01809,COG:COG0169,TIGR:TIGR00507 Shikimate 5-dehydrogenase	0	2.4	0	0	0	0	0	0	0	0	0	0	0	0	0	0	0	0	0	0	0	0	0	0
CLST186973 NOG:NOG72509 Tonb-Dependent outer membrane protein	3.2	4.7	0	0	0	0	0	0	0	0	0	0	0	0	0	0	0	0	0	0	0	0	0	0
CLST187002 hypothetical protein	0	0	0	0	0	0	0	0	0	0	0	0	0	0	1	5.1	0	0	0	0	0	0	0	0
CLST187407 COG:COG0203,TIGR:TIGR00059,KEGG:K02879 Ribosomal protein L17	0	0	0	0	0	0	0	0	0	0	0	0	0	0	0	0	0	0	3.6	4.5	0	0	0	0
CLST187525 hypothetical protein	0	0	0	0	0	0	0	0	0	0.9	0	0	0	0	0	0	0	0	0	0	0	0	0	0
CLST187714 PFAM:PF07660.7,NOG:NOG148246 Receptor	0	2.4	0	0	0	0	0	0	0	0	0	0	0	0	0	0	0	0	0	0	10.6	13.1	0	0
CLST187726 TIGR:TIGR01842,TIGR:TIGR01192,TIGR:TIGR01186,TIGR:TIGR02315,COG:COG1136,TIGR:TIGR02982,TIGR:TIGR01166,KEGG:K02003,TIGR:TIGR03608,TIGR:TIGR02211 ABC-type antimicrobial peptide transport system, ATPase component	4.2	0	0	0	1.8	0	0	0	0	0	0	0	0	0	0	0	0	0	0	0	0	0	0	0
CLST187847 hypothetical protein	0	0	0	0	0	0	0	0	0	0	0	0	0	0	0	0	5.6	3.2	1.8	0	0	0	0	0
CLST187915 TIGR:TIGR01417,KEGG:K08483,COG:COG1080,PFAM:PF00391.16 Phosphoenolpyruvate-protein kinase (PTS system EI component in bacteria)	0	0	5.1	4.1	0	0	0	0	0	0	0	0	0	0	0	0	2.3	0	0	0	0	0	0	0
CLST187989 NOG:NOG85887 Receptor	0	0	3.1	0	0	0	0	0	0	0	0	0	0	0	0	0	0	0	0	0	0	0	0	0
CLST188235 hypothetical protein	2.1	0	0	0	0	0	0	0	0	0	0	0	0	0	0	0	0	0	0	0	0	0	0	0
CLST188571 COG:COG0008,TIGR:TIGR00440,KEGG:K01886 Glutamyl- and glutaminyl-tRNA synthetases	0	0	0	0	1.8	0	0	0	0	0	0	0	0	0	0	0	0	0	0	0	0	0	0	0
[truncated: 3,788 more rows]

## Sheet: Healthy_vs_ICD_MicrobialOnly
Protein	6a_2	6a_3	6b_1	6b_2	16b_2	16b_3	18b_1	18b_2	10a_1	10a_3	10b_1	10b_2	15a_1	15a_2	15b_1	15b_2	16a_1	16a_2	18a_1	18a_2	Difference	Pvalue	Qvalue	Change
CLST000006 TIGR:TIGR01067,KEGG:K02874,COG:COG0093 Ribosomal protein L14	13.8	18.9	5.1	1	10.8	8.2	5.4	8	4.6	3.7	19.7	19	11	15	10.3	8.1	15.8	19	6.3	8.7	-2.55	0.263089	0.191468	NULL
CLST000011 COG:COG0100,TIGR:TIGR03631,KEGG:K02948,TIGR:TIGR03632 Ribosomal protein S11	13.8	15.3	10.2	8.2	32.4	29	26.9	26.7	7.3	9.2	8.8	6.7	15	16	11.3	12.2	11.3	7.4	10.6	5.4	11.1	0.0185721	0.0270783	UP
CLST000028 KEGG:K02899,TIGR:TIGR00062,COG:COG0211 Ribosomal protein L27	4.2	0	5.1	6.2	3.6	0	3.6	4.4	8.2	6.4	2.2	4.5	6	6.4	0	8.1	0	0	0	7.6	-1.35	0.411304	0.25946	NULL
CLST000029 PFAM:PF00004.22,COG:COG3451,PFAM:PF02861.13,KEGG:K03695,TIGR:TIGR03346,COG:COG0542 ATPases with chaperone activity, ATP-binding subunit	13.8	18.9	13.3	12.4	9.9	10	3.6	4.4	1.8	1.8	0	1.1	12	17.1	3.1	8.1	2.3	2.1	0	0	9.25	0.00765886	0.0144942	UP
CLST000052 TIGR:TIGR00483,TIGR:TIGR00485,COG:COG0050,KEGG:K02358,TIGR:TIGR00475 GTPases - translation elongation factors	5.3	8.3	0	0	0	0	12.6	9.8	0.9	0	18.6	11.2	0	0	1	4.1	0	0	1.1	3.3	1.7	0.839747	0.408442	NULL
CLST000056 COG:COG0459,TIGR:TIGR02348,KEGG:K04077 Chaperonin GroEL (HSP60 family)	0	2.4	0	0	0	0	0	0	0	0	0	0	9	10.7	0	2	2.3	1.1	24.3	19.6	-1.55	0.0553942	0.0630725	NULL
CLST000183 COG:COG0100,KEGG:K02948,TIGR:TIGR03632 Ribosomal protein S11	1.1	2.4	2	0	0	0	3.6	1.8	0.9	6.4	7.7	13.4	0	0	0	0	5.6	7.4	0	0	1	0.777097	0.389146	NULL
CLST000208 NOG:NOG10616 Annotation not available	35	44.8	53.3	57.7	46.8	48.9	47.5	45.4	27.4	33	28.5	29	37	34.2	58.8	60.9	10.1	11.6	32.8	20.7	16.25	0.0186163	0.0270783	UP
CLST000238 TIGR:TIGR01829,TIGR:TIGR01963,TIGR:TIGR01830,KEGG:K00046,TIGR:TIGR01832,TIGR:TIGR02415,COG:COG1028 Dehydrogenases with different specificities (related to short-chain alcohol dehydrogenases)	22.3	17.7	5.1	3.1	8.1	10.9	9.9	12.5	1.8	4.6	0	0	0	0	0	0	0	0	0	0	10.4	0.000126488	0.00127311	UP
CLST000254 TIGR:TIGR00224,COG:COG1866,KEGG:K01610 Phosphoenolpyruvate carboxykinase (ATP)	74.3	115.7	129.1	132.8	110.7	115	60.1	65.9	47.5	56.8	87.7	68.1	34	55.5	32	35.5	29.3	30.6	37	31.5	76.6	0.00104196	0.00353756	UP
CLST000296 COG:COG0051,TIGR:TIGR01049,KEGG:K02946 Ribosomal protein S10	7.4	4.7	5.1	4.1	0	0	3.6	2.7	1.8	4.6	13.2	12.3	0	0	0	0	12.4	8.4	0	0	2.95	0.842048	0.408442	NULL
CLST000335 COG:COG0822 NifU homolog involved in Fe-S cluster formation	21.2	21.2	30.7	41.2	74.7	83.3	56.5	54.3	35.6	26.6	6.6	19	21	20.3	35	35.5	15.8	17.9	27.5	34.8	23.95	0.0150492	0.022891	UP
CLST000357 TIGR:TIGR01534,COG:COG0057,KEGG:K00134 Glyceraldehyde-3-phosphate dehydrogenase/erythrose-4-phosphate dehydrogenase	5.3	4.7	9.2	13.4	0	0	11.7	8	0	0.9	0	0	4	5.3	1	0	0	0	18	18.5	6.2	0.202001	0.164594	NULL
CLST000603 COG:COG0057,PFAM:PF00044.17,TIGR:TIGR01534,KEGG:K00134 Glyceraldehyde-3-phosphate dehydrogenase/erythrose-4-phosphate dehydrogenase	165.6	199.5	126	134.9	252.9	317.9	201.7	200.2	44.7	50.4	120.6	117.1	40	43.8	66	49.7	42.8	49.6	28.6	30.5	152.7	0.000247624	0.00136193	UP
CLST000797 TIGR:TIGR00485,COG:COG0050,KEGG:K02358,TIGR:TIGR03680,TIGR:TIGR00475 GTPases - translation elongation factors	49.9	36.6	56.4	52.5	78.3	81.5	20.6	24	21	26.6	37.3	55.8	28	26.7	46.4	27.4	22.5	20.1	18	17.4	24.55	0.0409023	0.0510553	NULL
CLST000974 PFAM:PF00936.12,COG:COG4577 Carbon dioxide concentrating mechanism/carboxysome shell protein	0	0	1	0	0	0	10.8	14.2	5.5	9.2	11	21.2	3	3.2	1	0	2.3	1.1	0	0	-2.65	0.216459	0.171607	NULL
CLST000998 KEGG:K02867,COG:COG0080,TIGR:TIGR01632,PFAM:PF03946.7 Ribosomal protein L11	15.9	24.8	19.5	18.5	22.5	24.5	26	22.2	11.9	14.7	25.2	21.2	16	28.8	8.2	8.1	7.9	11.6	10.6	8.7	10.6	0.0278905	0.0371874	UP
CLST001044 TIGR:TIGR00485,COG:COG0050,KEGG:K02358 GTPases - translation elongation factors	21.2	29.5	11.3	5.1	57.6	45.3	40.3	31.1	0	0	0	0	8	8.5	12.4	12.2	1.1	0	3.2	4.4	28.15	0.00125471	0.0039098	UP
CLST001471 TIGR:TIGR00981,KEGG:K02950,COG:COG0048 Ribosomal protein S12	4.2	7.1	4.1	3.1	5.4	9.1	3.6	6.2	7.3	11	2.2	0	0	2.1	0	3	2.3	0	2.1	3.3	2.65	0.0146714	0.022851	NULL
CLST001935 TIGR:TIGR01938,COG:COG1592,KEGG:K00348,PFAM:PF02915.10 Rubrerythrin	63.7	74.4	44.1	37.1	99	115	44.8	48.9	58.4	60.5	75.7	55.8	80.9	106.8	53.6	51.8	46.2	47.5	55	53.3	0.9	0.728454	0.377082	NULL
CLST002489 KEGG:K02867,COG:COG0080,TIGR:TIGR01632 Ribosomal protein L11	9.6	11.8	11.3	7.2	10.8	13.6	14.3	11.6	0	0	3.3	3.3	0	0	12.4	15.2	2.3	0	7.4	6.5	8.65	0.011489	0.0194429	UP
CLST002546 KEGG:K03046,COG:COG0086,TIGR:TIGR02388,TIGR:TIGR02386 DNA-directed RNA polymerase, beta subunit/160 kD subunit	22.3	24.8	3.1	1	15.3	15.4	10.8	9.8	0	0.9	0	0	0	0	4.1	4.1	0	0	0	0	13.05	0.000431486	0.00207231	UP
CLST002554 TIGR:TIGR00855,COG:COG0222,KEGG:K02935 Ribosomal protein L7/L12	8.5	10.6	3.1	2.1	36	22.6	17.9	28.5	0	0	0	0	2	1.1	22.7	19.3	1.1	0	20.1	25	13.15	0.0473578	0.0578818	NULL
CLST002684 TIGR:TIGR01418,COG:COG3605,TIGR:TIGR01828,KEGG:K01006,COG:COG0574 Phosphoenolpyruvate synthase/pyruvate phosphate dikinase	3.2	2.4	0	1	12.6	15.4	8.1	11.6	0	0	0	1.1	4	0	3.1	3	0	0	0	0	5.65	0.0108361	0.0185161	UP
CLST002816 COG:COG0479,KEGG:K00240 Succinate dehydrogenase/fumarate reductase, Fe-S protein subunit	14.9	14.2	15.4	16.5	11.7	13.6	9.9	4.4	0	0	0	0	32	52.3	23.7	22.3	16.9	17.9	67.7	57.6	-6.2	0.229995	0.177508	NULL
CLST003058 KEGG:K04043,COG:COG0443,TIGR:TIGR02350 Molecular chaperone	19.1	15.3	4.1	2.1	18.9	12.7	14.3	15.1	2.7	2.7	0	0	0	0	1	1	0	0	0	0	14.7	0.000283736	0.00151326	UP
CLST003095 KEGG:K02982,COG:COG0092,TIGR:TIGR01009 Ribosomal protein S3	10.6	0	0	0	8.1	8.2	5.4	4.4	0	0	0	0	0	0	0	0	0	0	0	0	4.9	0.00277869	0.00665427	NULL
CLST003109 COG:COG0459,TIGR:TIGR02348,KEGG:K04077 Chaperonin GroEL (HSP60 family)	35	24.8	11.3	10.3	24.3	22.6	49.3	40	0	0	0	0	0	3.2	18.6	23.3	0	0	8.5	6.5	24.55	0.000807427	0.00290015	UP
CLST003218 TIGR:TIGR01169,COG:COG0081,KEGG:K02863,NOG:NOG131359 Protein involved in regulation of translation	0	2.4	2	3.1	6.3	12.7	7.2	6.2	0	0	0	0	0	0	0	0	0	0	0	0	4.65	0.000172025	0.00127311	NULL
CLST003251 PFAM:PF00166.14,COG:COG0234,KEGG:K04078 Co-chaperonin GroES (HSP10)	5.3	4.7	0	2.1	0.9	4.5	5.4	6.2	0	0	0	0	0	0	3.1	3	0	0	3.2	5.4	4.6	0.0234654	0.0333057	NULL
CLST003280 TIGR:TIGR01811,COG:COG1053,KEGG:K00239 Succinate dehydrogenase/fumarate reductase, flavoprotein subunit	45.6	61.4	34.8	25.7	38.7	39.8	16.1	14.2	6.4	4.6	0	0	51	56.6	56.7	45.7	39.4	31.7	83.6	74	-5.8	0.787058	0.389146	NULL
CLST003282 COG:COG0148,KEGG:K01689,TIGR:TIGR01060 Enolase	36.1	35.4	5.1	4.1	6.3	6.3	8.1	11.6	0	0	0	0	0	2.1	9.3	8.1	0	0	3.2	4.4	7.2	0.00351192	0.00777024	UP
CLST003298 TIGR:TIGR02013,COG:COG0085,KEGG:K03043,PFAM:PF00562.21 DNA-directed RNA polymerase, beta subunit/140 kD subunit	21.2	24.8	4.1	5.1	18.9	25.4	17.9	10.7	0	0	0	1.1	0	0	2.1	0	2.3	1.1	0	0	18.4	0.000152024	0.00127311	UP
CLST003335 TIGR:TIGR01394,COG:COG0480,TIGR:TIGR00484,KEGG:K02355 Translation elongation factors (GTPases)	4.2	9.4	1	0	16.2	14.5	9	4.4	0	0	0	0	0	0	4.1	3	0	0	1.1	0	6.7	0.00228787	0.00594988	UP
CLST003337 COG:COG0052,TIGR:TIGR01011,KEGG:K02967 Ribosomal protein S2	0	3.5	2	5.1	19.8	23.5	6.3	5.3	0	0	0	0	0	0	0	3	0	0	0	0	5.2	0.000495421	0.00217985	UP
CLST003352 TIGR:TIGR00717,PFAM:PF00575.16,COG:COG0539,KEGG:K02945 Ribosomal protein S1	7.4	3.5	2	0	13.5	4.5	8.1	6.2	0	0	0	0	0	0	0	0	0	0	0	0	5.35	0.000172025	0.00127311	UP
CLST003365 NOG:NOG125984,TIGR:TIGR03496,COG:COG0055,KEGG:K02112,TIGR:TIGR01039 ATP synthase	10.6	7.1	10.2	4.1	6.3	10	15.2	12.5	0	0	0	0	0	2.1	23.7	14.2	5.6	6.3	0	0	10.1	0.0179911	0.0268342	UP
CLST003527 TIGR:TIGR00485,COG:COG0050,KEGG:K02358 GTPases - translation elongation factors	2.1	0	6.1	13.4	0	0	5.4	11.6	0	0	0	0	1	1.1	2.1	2	0	0	16.9	12	3.25	0.373399	0.242503	NULL
CLST003596 TIGR:TIGR01859,COG:COG0191,KEGG:K01624 Fructose/tagatose bisphosphate aldolase	9.6	10.6	2	2.1	16.2	17.2	15.2	9.8	0	0	0	0	0	0	0	0	0	0	0	0	10.2	3.52914e-05	0.000690143	UP
CLST003653 KEGG:K03040,TIGR:TIGR02027,COG:COG0202 DNA-directed RNA polymerase, alpha subunit/40 kD subunit	3.2	7.1	3.1	0	9.9	10	10.8	8.9	2.7	2.7	0	0	0	0	0	0	0	0	0	0	8	0.000621976	0.00266995	UP
CLST003692 COG:COG0517,KEGG:K00088,COG:COG0516,TIGR:TIGR01302 IMP dehydrogenase/GMP reductase	14.9	9.4	9.2	7.2	5.4	6.3	10.8	8	0	0	0	0	0	0	16.5	13.2	0	0	16.9	16.3	8.6	0.188438	0.158685	NULL
CLST004773 TIGR:TIGR03316,COG:COG0078 Ornithine carbamoyltransferase	7.4	4.7	3.1	2.1	1.8	1.8	0	0	4.6	0.9	2.2	7.8	0	2.1	10.3	10.1	0	2.1	0	3.3	-0.2	0.61267	0.336968	NULL
CLST004989 KEGG:K01623,COG:COG1830 DhnA-type fructose-1,6-bisphosphate aldolase and related enzymes	7.4	2.4	4.1	6.2	2.7	0	5.4	3.6	0	0	0	0	6	8.5	6.2	4.1	0	0	13.7	10.9	1.8	0.782457	0.389146	NULL
CLST005054 TIGR:TIGR03630,TIGR:TIGR03635,KEGG:K02961,COG:COG0186,NOG:NOG138354 Ribosomal protein	3.2	0	5.1	0	9.9	7.2	3.6	2.7	1.8	0.9	2.2	0	7	6.4	4.1	5.1	3.4	2.1	4.2	2.2	0.6	0.699029	0.366301	NULL
CLST005254 KEGG:K09157,PFAM:PF05167.5,COG:COG2848 Uncharacterized conserved protein	0	5.9	3.1	3.1	1.8	0	0	0	0	0	7.7	6.7	0	5.3	6.2	7.1	2.3	2.1	0	0	-1.3	0.395512	0.252224	NULL
CLST005286 KEGG:K00262,PFAM:PF02812.11,COG:COG0334,PFAM:PF00208.14 Glutamate dehydrogenase/leucine dehydrogenase	8.5	5.9	8.2	3.1	18	17.2	3.6	2.7	2.7	2.7	0	0	9	5.3	5.2	10.1	0	0	6.3	8.7	3.1	0.151322	0.134784	NULL
CLST005426 KEGG:K01687,TIGR:TIGR00110,COG:COG0129,TIGR:TIGR01196 Dihydroxyacid dehydratase/phosphogluconate dehydratase	5.3	5.9	5.1	8.2	0	1.8	0.9	1.8	0	0	4.4	6.7	4	5.3	0	0	3.4	2.1	0	0	2.4	0.206857	0.167003	NULL
CLST005448 KEGG:K02886,TIGR:TIGR01171,COG:COG0090 Ribosomal protein L2	11.7	10.6	7.2	5.1	14.4	8.2	5.4	6.2	8.2	7.3	4.4	2.2	9	5.3	3.1	2	5.6	3.2	5.3	9.8	2.4	0.0535766	0.0620361	NULL
CLST005531 TIGR:TIGR01859,COG:COG0191,KEGG:K01624 Fructose/tagatose bisphosphate aldolase	35	37.8	35.9	45.3	68.4	71.5	34.1	26.7	14.6	14.7	46.1	30.1	25	29.9	19.6	21.3	31.5	24.3	10.6	16.3	14.05	0.00297471	0.0068888	UP
CLST005542 COG:COG0057,TIGR:TIGR01534,KEGG:K00134 Glyceraldehyde-3-phosphate dehydrogenase/erythrose-4-phosphate dehydrogenase	51	60.2	45.1	35	77.4	70.6	51.1	47.2	0	0	1.1	2.2	11	12.8	29.9	39.6	3.4	0	69.8	79.4	43.85	0.0120319	0.0196366	UP
CLST005618 TIGR:TIGR00465,COG:COG0059,PFAM:PF01450.12,PFAM:PF07991.5,KEGG:K00053 Ketol-acid reductoisomerase	29.7	43.7	63.5	56.6	44.1	41.7	25.1	23.1	12.8	11	46.1	58	23	28.8	20.6	18.3	6.8	14.8	13.7	19.6	23.75	0.0121613	0.0196366	UP
CLST005626 PFAM:PF03725.8,COG:COG1185,KEGG:K00962,TIGR:TIGR03591 Polyribonucleotide nucleotidyltransferase (polynucleotide phosphorylase)	7.4	3.5	3.1	4.1	3.6	4.5	0.9	3.6	0	0	0	0	0	0	2.1	5.1	0	0	12.7	10.9	3.6	0.0609395	0.0664614	NULL
CLST005644 COG:COG4864,PFAM:PF12127.1 Uncharacterized protein conserved in bacteria	4.2	7.1	0	0	6.3	4.5	6.3	5.3	0	0	0	0	0	0	0	0	3.4	3.2	0	0	4.9	0.00351613	0.00777024	NULL
CLST005666 COG:COG0459,TIGR:TIGR02348,KEGG:K04077 Chaperonin GroEL (HSP60 family)	141.2	162.9	108.6	84.4	93.6	90.6	46.6	35.6	65.7	66	82.2	112.7	168.9	221.1	95.9	76.1	38.3	25.3	48.7	44.6	21.05	0.51196	0.300363	NULL
CLST005695 COG:COG1932,TIGR:TIGR01364,KEGG:K00831 Phosphoserine aminotransferase	4.2	3.5	16.4	19.6	18	20.8	6.3	7.1	0	0	2.2	4.5	0	2.1	0	1	9	5.3	0	0	11.25	0.00201238	0.00536635	UP
CLST005732 KEGG:K00615,TIGR:TIGR00232,COG:COG0021 Transketolase	9.6	5.9	2	3.1	10.8	13.6	1.8	2.7	0	0	0	0	0	0	0	0	0	0	0	0	4.5	3.52914e-05	0.000690143	NULL
CLST005780 TIGR:TIGR03631,PFAM:PF00416.15,COG:COG0099,KEGG:K02952 Ribosomal protein S13	6.4	3.5	3.1	1	11.7	9.1	9.9	8.9	6.4	12.8	5.5	3.3	8	7.5	3.1	4.1	3.4	2.1	2.1	3.3	3.9	0.33412	0.227418	NULL
CLST005782 KEGG:K01603,TIGR:TIGR01117,KEGG:K01966,COG:COG4799 Acetyl-CoA carboxylase, carboxyltransferase component (subunits alpha and beta)	18	20.1	8.2	9.3	12.6	18.1	7.2	4.4	0	0	0	0	0	2.1	16.5	17.3	0	0	3.2	9.8	10.95	0.00827168	0.0154874	UP
CLST005801 KEGG:K00262,PFAM:PF02812.11,COG:COG0334,PFAM:PF00208.14 Glutamate dehydrogenase/leucine dehydrogenase	32.9	40.1	23.6	23.7	18.9	18.1	21.5	19.6	12.8	3.7	0	0	23	17.1	25.8	19.3	3.4	2.1	37	28.3	7.6	0.0824639	0.0834117	NULL
CLST005804 COG:COG0094,PFAM:PF00673.14,PFAM:PF00281.12,KEGG:K02931 Ribosomal protein L5	29.7	20.1	26.6	17.5	50.4	43.5	12.6	16	16.4	15.6	21.9	19	18	16	20.6	19.3	12.4	13.7	19	14.1	6.15	0.104931	0.100369	NULL
CLST005825 TIGR:TIGR00855,COG:COG0222,KEGG:K02935 Ribosomal protein L7/L12	40.3	30.7	34.8	31.9	54	48.9	25.1	25.8	29.2	28.4	45	37.9	40	76.9	57.7	59.9	39.4	30.6	41.2	34.8	-6.35	0.315692	0.217677	NULL
CLST005840 PFAM:PF02787.12,KEGG:K01955,COG:COG0458,PFAM:PF02786.10,PFAM:PF00289.15,TIGR:TIGR01369 Carbamoylphosphate synthase large subunit (split gene in MJ)	1.1	7.1	7.2	0	3.6	5.4	6.3	7.1	0	0	0	0	0	0	2.1	0	0	0	0	0	5.85	0.00049234	0.00217985	UP
CLST005841 TIGR:TIGR01044,KEGG:K02890,COG:COG0091 Ribosomal protein L22	0	15.3	10.2	8.2	9.9	10	9.9	8.9	5.5	12.8	2.2	0	14	8.5	11.3	5.1	0	0	0	0	6.25	0.137244	0.123871	NULL
CLST005842 PFAM:PF04560.13,TIGR:TIGR02013,COG:COG0085,PFAM:PF10385.2,PFAM:PF04565.9,KEGG:K03043,PFAM:PF00562.21,PFAM:PF04561.7,TIGR:TIGR03670 DNA-directed RNA polymerase, beta subunit/140 kD subunit	9.6	13	33.8	22.7	18.9	28.1	7.2	8	5.5	2.7	8.8	11.2	5	11.7	9.3	11.2	9	4.2	0	2.2	8.8	0.0121289	0.0196366	UP
CLST005865 TIGR:TIGR01029,COG:COG0049,KEGG:K02992 Ribosomal protein S7	17	26	18.4	14.4	35.1	34.4	19.7	14.2	10	11.9	7.7	8.9	13	27.8	17.5	18.3	12.4	19	11.6	10.9	6.9	0.0150873	0.022891	UP
CLST005872 COG:COG0052,TIGR:TIGR01011,KEGG:K02967 Ribosomal protein S2	11.7	15.3	7.2	8.2	17.1	13.6	17.9	4.4	4.6	8.2	4.4	3.3	6	9.6	14.4	14.2	7.9	3.2	0	6.5	6.4	0.0407506	0.0510553	NULL
CLST005913 COG:COG0205,KEGG:K00895,TIGR:TIGR02477 6-phosphofructokinase	4.2	3.5	4.1	5.1	6.3	2.7	4.5	8.9	2.7	4.6	0	0	0	0	0	5.1	0	0	6.3	6.5	4.35	0.0694921	0.0732371	NULL
CLST005915 KEGG:K04043,COG:COG0443,TIGR:TIGR02350 Molecular chaperone	47.8	59	37.9	31.9	43.2	29.9	14.3	10.7	17.3	24.7	27.4	29	61	72.6	47.4	41.6	12.4	16.9	9.5	9.8	8.85	0.463594	0.285289	NULL
CLST005929 COG:COG0185,TIGR:TIGR01050,KEGG:K02965 Ribosomal protein S19	14.9	8.3	5.1	6.2	15.3	8.2	7.2	0.9	15.5	11	7.7	5.6	10	16	8.2	9.1	5.6	3.2	9.5	7.6	-0.95	0.487126	0.292608	NULL
CLST005977 COG:COG1592 Rubrerythrin	1.1	2.4	4.1	0	9	5.4	4.5	5.3	0	0	0	0	0	3.2	0	5.1	0	0	7.4	8.7	4.3	0.0820225	0.0834117	NULL
CLST005988 KEGG:K02887,TIGR:TIGR01032,COG:COG0292 Ribosomal protein L20	0	3.5	7.2	5.1	2.7	5.4	4.5	5.3	5.5	11	3.3	0	23	26.7	2.1	2	2.3	0	2.1	0	2.6	0.485644	0.292608	NULL
CLST005996 KEGG:K02994,COG:COG0096,PFAM:PF00410.12 Ribosomal protein S8	23.4	31.9	23.6	17.5	26.1	30.8	9	7.1	12.8	18.3	13.2	19	30	35.2	21.6	16.2	14.6	14.8	10.6	10.9	8	0.417887	0.260809	NULL
CLST006000 PFAM:PF00709.14,KEGG:K01939,TIGR:TIGR00184,COG:COG0104 Adenylosuccinate synthase	8.5	10.6	2	2.1	7.2	5.4	2.7	1.8	0	1.8	7.7	10	0	0	7.2	3	0	0	0	0	4.05	0.0532571	0.0620361	NULL
CLST006057 COG:COG0238,KEGG:K02963,PFAM:PF01084.13 Ribosomal protein S18	0	3.5	2	2.1	0	0	3.6	2.7	8.2	7.3	8.8	15.6	0	0	0	0	12.4	12.7	0	0	-1.6	0.491743	0.293379	NULL
CLST006170 TIGR:TIGR03627,COG:COG0103,KEGG:K02996,PFAM:PF00380.12 Ribosomal protein S9	19.1	17.7	18.4	13.4	20.7	21.7	9	7.1	10	6.4	13.2	13.4	9	22.4	16.5	8.1	13.5	10.6	5.3	2.2	7.75	0.0823485	0.0834117	NULL
CLST006191 TIGR:TIGR01393,TIGR:TIGR00484,KEGG:K02355,COG:COG0480 Translation elongation factors (GTPases)	41.4	47.2	49.2	42.2	53.1	52.5	28.7	24.9	14.6	15.6	26.3	41.3	25	21.4	20.6	18.3	34.9	27.4	8.5	5.4	23.7	0.00178021	0.00484373	UP
CLST006216 TIGR:TIGR02176,COG:COG1014,KEGG:K03737,COG:COG0674,COG:COG1013 Pyruvate:ferredoxin oxidoreductase and related 2-oxoacid:ferredoxin oxidoreductases, beta subunit	40.3	33	20.5	20.6	46.8	50.7	21.5	17.8	0	0	0	0	1	1.1	17.5	8.1	0	0	6.3	13.1	26.75	0.000204092	0.00136193	UP
CLST006295 PFAM:PF01808.11,KEGG:K01492,COG:COG0138,KEGG:K00602,TIGR:TIGR00355 AICAR transformylase/IMP cyclohydrolase PurH (only IMP cyclohydrolase domain in Aful)	6.4	4.7	13.3	26.8	3.6	3.6	1.8	1.8	0	0	6.6	8.9	6	3.2	0	3	6.8	7.4	0	0	1.05	0.259291	0.190147	NULL
CLST006298 TIGR:TIGR01169,COG:COG0081,KEGG:K02863 Ribosomal protein L1	20.2	29.5	16.4	11.3	62.1	73.4	18.8	17.8	11	15.6	32.9	51.3	26	21.4	27.8	28.4	5.6	2.1	7.4	10.9	1	0.263268	0.191468	NULL
CLST006300 KEGG:K01006,TIGR:TIGR01417,TIGR:TIGR01828,COG:COG0574 Phosphoenolpyruvate synthase/pyruvate phosphate dikinase	97.7	122.7	138.3	139	229.5	235.5	137.2	141.5	27.4	21.1	54.8	78.1	33	36.3	36.1	29.4	39.4	38	6.3	6.5	104.1	0.000247624	0.00136193	UP
CLST006373 KEGG:K10112,TIGR:TIGR01187,TIGR:TIGR01186,PFAM:PF03459.10,TIGR:TIGR02142,TIGR:TIGR03258,TIGR:TIGR02315,TIGR:TIGR03265,TIGR:TIGR00968,COG:COG3839,TIGR:TIGR03269 ABC-type sugar transport systems, ATPase components	15.9	20.1	42	41.2	57.6	43.5	18.8	19.6	1.8	6.4	20.8	13.4	17	36.3	16.5	8.1	34.9	24.3	3.2	0	15.7	0.0228475	0.0326924	UP
CLST006421 PFAM:PF03764.11,PFAM:PF00679.17,TIGR:TIGR00484,KEGG:K02355,COG:COG0480,TIGR:TIGR00490 Translation elongation factors (GTPases)	8.5	2.4	0	3.1	11.7	8.2	8.1	7.1	0	0	0	0	0	0	0	0	0	0	0	0	7.6	0.000172025	0.00127311	UP
CLST006584 KEGG:K00088,TIGR:TIGR01302,COG:COG0517,COG:COG0516 IMP dehydrogenase/GMP reductase	9.6	16.5	37.9	29.9	7.2	11.8	2.7	0.9	6.4	9.2	6.6	17.9	11	17.1	14.4	8.1	15.8	13.7	12.7	14.1	-2.5	0.847054	0.408442	NULL
CLST006587 COG:COG1449,KEGG:K07405 Alpha-amylase/alpha-mannosidase	0	7.1	8.2	7.2	2.7	2.7	0	2.7	0	0	0	0	0	0	5.2	7.1	0	0	0	0	2.7	0.018432	0.0270783	NULL
CLST006673 TIGR:TIGR01049,COG:COG0051,TIGR:TIGR01046,KEGG:K02946 Ribosomal protein S10	13.8	17.7	13.3	10.3	25.2	35.3	4.5	8	8.2	15.6	8.8	10	19	19.2	19.6	15.2	5.6	4.2	7.4	6.5	4.15	0.417887	0.260809	NULL
CLST006805 TIGR:TIGR00012,PFAM:PF00831.16,KEGG:K02904,COG:COG0255 Ribosomal protein L29	4.2	0	3.1	0	6.3	1.8	1.8	5.3	7.3	2.7	2.2	4.5	4	10.7	6.2	2	3.4	0	6.3	5.4	-1.8	0.163961	0.143568	NULL
CLST006834 PFAM:PF00162.12,COG:COG0126,KEGG:K00927 3-phosphoglycerate kinase	35	23.6	65.6	75.2	61.2	60.7	13.4	15.1	15.5	22.9	76.8	73.6	16	8.5	23.7	21.3	30.4	31.7	6.3	6.5	25.75	0.231755	0.177508	NULL
CLST006844 COG:COG0102,KEGG:K02871,TIGR:TIGR01066 Ribosomal protein L13	21.2	16.5	12.3	13.4	26.1	18.1	2.7	3.6	8.2	6.4	11	7.8	9	13.9	11.3	6.1	2.3	0	3.2	7.6	7.25	0.0409023	0.0510553	NULL
CLST006878 KEGG:K03530,PFAM:PF00216.14,COG:COG0776 Bacterial nucleoid DNA-binding protein	10.6	17.7	14.3	13.4	13.5	14.5	0	0	11	10.1	12.1	20.1	42	42.7	8.2	9.1	6.8	6.3	8.5	4.4	3.85	0.787058	0.389146	NULL
CLST006883 TIGR:TIGR03496,KEGG:K02114,KEGG:K02112,PFAM:PF00401.13,TIGR:TIGR03498,COG:COG0055,TIGR:TIGR03305,TIGR:TIGR01039 F0F1-type ATP synthase, beta subunit	4.2	4.7	7.2	7.2	8.1	10	3.6	2.7	2.7	3.7	6.6	1.1	12	11.7	7.2	5.1	3.4	5.3	9.5	6.5	0.05	1	0.45953	NULL
CLST006904 KEGG:K02892,PFAM:PF00276.13,COG:COG0089,TIGR:TIGR03636 Ribosomal protein L23	8.5	7.1	9.2	7.2	11.7	11.8	0	1.8	4.6	7.3	5.5	13.4	20	18.2	5.2	5.1	11.3	5.3	12.7	7.6	0.4	0.562834	0.318517	NULL
CLST006921 NOG:NOG118713 Protein involved in phosphoenolpyruvate-dependent sugar phosphotransferase system	7.4	4.7	4.1	8.2	9.9	10.9	4.5	3.6	12.8	11.9	15.4	8.9	12	20.3	12.4	12.2	7.9	8.4	13.7	14.1	-6.25	0.00178021	0.00484373	DOWN
CLST007033 KEGG:K00656,TIGR:TIGR01255,COG:COG1882 Pyruvate-formate lyase	19.1	20.1	59.4	48.4	81.9	72.5	14.3	17.8	11.9	11.9	54.8	27.9	7	16	8.2	6.1	4.5	6.3	6.3	9.8	25.25	0.00378717	0.00818514	UP
CLST007063 hypothetical protein	0	2.4	8.2	6.2	0	0	0.9	0	0	0	6.6	7.8	6	8.5	4.1	4.1	0	5.3	0	0	-3.65	0.543915	0.310809	NULL
CLST007119 KEGG:K03046,TIGR:TIGR02389,PFAM:PF04997.5,TIGR:TIGR02388,COG:COG0086,TIGR:TIGR02387,TIGR:TIGR02386 DNA-directed RNA polymerase, beta subunit/160 kD subunit	20.2	20.1	20.5	21.6	24.3	23.5	6.3	10.7	7.3	9.2	9.9	2.2	3	7.5	13.4	7.1	3.4	5.3	4.2	2.2	14.15	0.00177311	0.00484373	UP
CLST007120 KEGG:K00616,TIGR:TIGR00875,COG:COG0176 Transaldolase	30.8	27.1	34.8	22.7	30.6	34.4	9	7.1	4.6	0	14.3	8.9	16	35.2	8.2	9.1	2.3	6.3	13.7	4.4	20.3	0.0228475	0.0326924	UP
CLST007181 COG:COG0148,KEGG:K01689,TIGR:TIGR01060 Enolase	3.2	2.4	0	0	18	17.2	6.3	8	5.5	1.8	23	35.7	0	1.1	0	0	0	0	0	0	4.75	0.181996	0.15474	NULL
CLST007182 TIGR:TIGR00978,COG:COG0136,KEGG:K00133,TIGR:TIGR01296 Aspartate-semialdehyde dehydrogenase	2.1	4.7	9.2	7.2	14.4	15.4	0.9	1.8	2.7	2.7	9.9	6.7	3	4.3	4.1	7.1	0	0	2.1	5.4	2.4	0.353996	0.233346	NULL
CLST007187 KEGG:K01580,COG:COG0076,TIGR:TIGR01788 Glutamate decarboxylase and related PLP-dependent proteins	5.3	7.1	2	2.1	0	0	0	0	0	0	0	0	0	0	0	0	0	0	7.4	12	1	0.274013	0.197297	NULL
CLST007193 TIGR:TIGR00060,COG:COG0256,KEGG:K02881 Ribosomal protein L18	2.1	4.7	0	2.1	5.4	4.5	2.7	1.8	8.2	6.4	3.3	4.5	12	15	2.1	3	1.1	1.1	2.1	4.4	-1.45	0.352358	0.233139	NULL
CLST007213 COG:COG0261,KEGG:K02888,TIGR:TIGR00061 Ribosomal protein L21	9.6	11.8	3.1	3.1	2.7	1.8	0	0	1.8	0.9	5.5	12.3	11	13.9	0	0	1.1	2.1	0	0	1.45	0.695621	0.366301	NULL
CLST007222 KEGG:K04567,COG:COG1190,TIGR:TIGR00458,TIGR:TIGR00462,TIGR:TIGR00499,TIGR:TIGR00399,COG:COG0073,TIGR:TIGR00459,PFAM:PF00152.13 Lysyl-tRNA synthetase (class II)	7.4	2.4	5.1	5.1	0	2.7	0	1.8	0	0	2.2	0	0	0	0	0	4.5	6.3	0	0	2.55	0.0470872	0.0578818	NULL
CLST007226 KEGG:K02986,COG:COG0522,TIGR:TIGR01017 Ribosomal protein S4 and related proteins	14.9	18.9	20.5	11.3	22.5	26.3	2.7	5.3	4.6	4.6	14.3	17.9	9	16	5.2	4.1	3.4	0	8.5	7.6	10.5	0.0490556	0.0588353	NULL
CLST007253 KEGG:K01756,TIGR:TIGR00928,COG:COG0015 Adenylosuccinate lyase	5.3	8.3	7.2	5.1	9.9	11.8	5.4	2.7	0	0	0	2.2	3	0	0	0	0	0	0	0	6.3	0.000126488	0.00127311	UP
CLST007258 TIGR:TIGR01771,COG:COG0039,TIGR:TIGR01763,KEGG:K00026 Malate/lactate dehydrogenases	9.6	4.7	5.1	8.2	13.5	13.6	4.5	6.2	0	0	0	0	0	0	9.3	10.1	0	0	6.3	8.7	7.2	0.0283779	0.0375528	UP
CLST007262 KEGG:K02982,TIGR:TIGR01009,COG:COG0092 Ribosomal protein S3	21.2	11.8	15.4	25.7	27.9	29.9	19.7	18.7	7.3	7.3	8.8	8.9	12	18.2	12.4	10.1	1.1	3.2	2.1	6.5	12.4	0.000786905	0.00288532	UP
CLST007269 COG:COG0098,KEGG:K02988,TIGR:TIGR01021 Ribosomal protein S5	21.2	37.8	24.6	21.6	38.7	46.2	18.8	15.1	6.4	14.7	23	11.2	8	11.7	18.6	16.2	11.3	11.6	9.5	14.1	11.45	0.00136574	0.00414433	UP
CLST007297 PFAM:PF02769.15,TIGR:TIGR01857,KEGG:K01952,TIGR:TIGR01735,TIGR:TIGR01739,COG:COG0047,TIGR:TIGR01737,COG:COG0046 Phosphoribosylformylglycinamidine (FGAM) synthase, synthetase domain	2.1	5.9	2	4.1	4.5	7.2	2.7	2.7	0	0	0	0	0	0	0	0	0	0	5.3	5.4	3.4	0.00341505	0.00777024	NULL
CLST007303 KEGG:K00656,TIGR:TIGR01255,PFAM:PF01228.14,COG:COG1882 Pyruvate-formate lyase	2.1	8.3	4.1	0	0	0	0	0	3.7	0	8.8	11.2	0	0	0	0	6.8	4.2	0	0	0	0.66327	0.356833	NULL
CLST007328 KEGG:K06412,COG:COG2088,PFAM:PF04026.5 Uncharacterized protein, involved in the regulation of septum location	3.2	5.9	0	3.1	2.7	5.4	2.7	0	2.7	4.6	5.5	4.5	9	8.5	7.2	4.1	0	5.3	4.2	3.3	-1.65	0.081656	0.0834117	NULL
CLST007338 TIGR:TIGR01235,COG:COG5016,TIGR:TIGR01108,KEGG:K01571 Pyruvate/oxaloacetate carboxyltransferase	13.8	17.7	25.6	20.6	17.1	13.6	6.3	4.4	2.7	0.9	8.8	4.5	3	6.4	5.2	3	3.4	7.4	2.1	0	12.25	0.00229882	0.00594988	UP
CLST007355 TIGR:TIGR01024,COG:COG0335,KEGG:K02884 Ribosomal protein L19	4.2	9.4	10.2	11.3	10.8	15.4	4.5	3.6	3.7	7.3	13.2	11.2	11	12.8	6.2	8.1	4.5	3.2	4.2	0	3.05	0.56254	0.318517	NULL
CLST007372 TIGR:TIGR00002,KEGG:K02959,COG:COG0228 Ribosomal protein S16	9.6	9.4	0	0	0	1.8	0	0	5.5	6.4	0	0	3	3.2	0	3	5.6	0	0	6.5	-3	0.620728	0.33928	NULL
CLST007389 KEGG:K02933,COG:COG0097,TIGR:TIGR03654 Ribosomal protein L6P/L9E	18	13	7.2	7.2	15.3	13.6	1.8	2.7	4.6	5.5	8.8	2.2	13	13.9	8.2	5.1	5.6	7.4	0	4.4	4.55	0.279725	0.200129	NULL
CLST007424 COG:COG0244,KEGG:K02864,NOG:NOG79906 Annotation not available	11.7	14.2	14.3	14.4	36	34.4	16.1	14.2	0	0	0	0	0	0	21.6	13.2	2.3	2.1	10.6	10.9	13.3	0.00153592	0.00450537	UP
CLST007461 KEGG:K04078,PFAM:PF00166.14,COG:COG0234 Co-chaperonin GroES (HSP10)	30.8	30.7	19.5	13.4	10.8	14.5	2.7	1.8	13.7	12.8	16.4	21.2	57	59.8	38.1	32.5	14.6	10.6	26.4	17.4	-5.35	0.132464	0.120796	NULL
CLST007506 KEGG:K03561,COG:COG0811,PFAM:PF01618.9 Biopolymer transport proteins	13.8	10.6	18.4	18.5	20.7	28.1	8.1	13.3	0	0	2.2	0	0	7.5	3.1	6.1	0	3.2	0	0	16.1	0.000180839	0.00127311	UP
CLST007573 COG:COG1185,KEGG:K00962,TIGR:TIGR03591 Polyribonucleotide nucleotidyltransferase (polynucleotide phosphorylase)	17	7.1	19.5	14.4	1.8	5.4	0	0	1.8	0	9.9	8.9	5	7.5	6.2	4.1	3.4	1.1	4.2	4.4	1.95	0.536327	0.309532	NULL
CLST007632 COG:COG0088,KEGG:K02926,PFAM:PF00573.15,NOG:NOG125323 Annotation not available	3.2	0	9.2	11.3	8.1	9.1	6.3	5.3	0	0	0	0	0	0	3.1	6.1	0	0	0	0	7.2	0.00114838	0.00367482	UP
CLST007639 PFAM:PF02810.8,KEGG:K03070,PFAM:PF07516.6,TIGR:TIGR00963,COG:COG0653,TIGR:TIGR03714 Preprotein translocase subunit SecA (ATPase, RNA helicase)	7.4	7.1	0	0	9	8.2	0.9	0	0	0	0	0	0	0	0	0	0	0	0	0	4	0.00277869	0.00665427	NULL
CLST007642 COG:COG0203,TIGR:TIGR00059,PFAM:PF01196.12,KEGG:K02879 Ribosomal protein L17	19.1	17.7	12.3	10.3	23.4	17.2	2.7	7.1	11	10.1	13.2	10	19	18.2	10.3	12.2	5.6	6.3	8.5	7.6	4.55	0.315692	0.217677	NULL
CLST007668 COG:COG0330 Membrane protease subunits, stomatin/prohibitin homologs	7.4	7.1	9.2	9.3	1.8	8.2	3.6	4.4	0	4.6	9.9	19	2	3.2	0	3	11.3	3.2	0	0	4.15	0.201144	0.164594	NULL
CLST007711 KEGG:K00688,PFAM:PF11897.1,TIGR:TIGR02094,COG:COG0058 Glucan phosphorylase	9.6	5.9	6.1	6.2	5.4	5.4	3.6	1.8	0	0	0	0	0	0	3.1	13.2	0	0	0	0	5.65	0.00149792	0.00446838	UP
CLST007783 TIGR:TIGR01936,COG:COG1726,PFAM:PF11973.1,KEGG:K00346,PFAM:PF05896.4 Na+-transporting NADH:ubiquinone oxidoreductase, subunit NqrA	7.4	11.8	8.2	5.1	2.7	5.4	4.5	4.4	0	0	0	0	2	3.2	21.6	15.2	14.6	15.8	9.5	9.8	-1.1	0.969112	0.452424	NULL
CLST007784 COG:COG0197,TIGR:TIGR01164,KEGG:K02878 Ribosomal protein L16/L10E	2.1	0	2	3.1	9	12.7	11.7	10.7	1.8	0.9	2.2	0	0	0	0	0	0	0	0	0	6.05	0.00173321	0.00484373	UP
CLST007787 KEGG:K02876,COG:COG0200,TIGR:TIGR01071 Ribosomal protein L15	2.1	2.4	9.2	7.2	9.9	6.3	5.4	1.8	1.8	7.3	8.8	8.9	0	0	0	5.1	0	3.2	2.1	3.3	3.2	0.151633	0.134784	NULL
CLST007797 KEGG:K02956,TIGR:TIGR00952,COG:COG0184 Ribosomal protein S15P/S13E	7.4	9.4	7.2	5.1	9.9	7.2	7.2	5.3	8.2	7.3	7.7	2.2	8	9.6	9.3	3	3.4	0	3.2	7.6	-0.25	0.670856	0.356833	NULL
CLST007798 KEGG:K03340,TIGR:TIGR01921,NOG:NOG27533 Dehydrogenase	7.4	2.4	3.1	3.1	0	1.8	0	1.8	0	0	0	0	0	2.1	4.1	6.1	0	0	7.4	6.5	2.1	0.51705	0.301327	NULL
CLST007809 COG:COG0800,KEGG:K01625 2-keto-3-deoxy-6-phosphogluconate aldolase	0	0	5.1	4.1	6.3	8.2	1.8	0	0	0	0	0	0	0	0	6.1	0	0	11.6	13.1	2.95	0.296039	0.207581	NULL
CLST008038 TIGR:TIGR02027,COG:COG0202,KEGG:K03040 DNA-directed RNA polymerase, alpha subunit/40 kD subunit	13.8	10.6	6.1	12.4	11.7	6.3	0.9	1.8	0	2.7	4.4	4.5	7	7.5	14.4	8.1	12.4	5.3	0	4.4	3.55	0.395532	0.252224	NULL
CLST008169 COG:COG3958,KEGG:K00615,TIGR:TIGR00232,PFAM:PF02780.13 Transketolase, C-terminal subunit	11.7	4.7	11.3	16.5	11.7	15.4	5.4	2.7	0	0	4.4	5.6	2	3.2	0	0	6.8	3.2	2.1	2.2	9.35	0.00284664	0.00668012	UP
CLST008309 TIGR:TIGR01040,TIGR:TIGR01041,KEGG:K02118,COG:COG1156 Archaeal/vacuolar-type H+-ATPase subunit B	10.6	8.3	7.2	4.1	1.8	1.8	0	0	0	0	5.5	10	5	7.5	5.2	3	0	0	0	0	1.45	0.448722	0.279064	NULL
CLST008351 PFAM:PF10371.2,TIGR:TIGR02176,COG:COG1014,KEGG:K03737,PFAM:PF00037.20,COG:COG0674,COG:COG1013 Pyruvate:ferredoxin oxidoreductase and related 2-oxoacid:ferredoxin oxidoreductases, beta subunit	41.4	42.5	12.3	18.5	72	59.8	15.2	11.6	6.4	11	17.5	22.3	30	26.7	18.6	17.3	1.1	6.3	7.4	10.9	15.8	0.0491408	0.0588353	NULL
CLST008416 KEGG:K00262,PFAM:PF02812.11,COG:COG0334,PFAM:PF00208.14 Glutamate dehydrogenase/leucine dehydrogenase	29.7	29.5	85	90.6	34.2	37.1	18.8	16.9	3.7	5.5	42.8	39	20	18.2	2.1	5.1	6.8	5.3	2.1	13.1	25.8	0.0121289	0.0196366	UP
CLST008429 TIGR:TIGR02144,COG:COG0458,PFAM:PF02786.10,TIGR:TIGR01369,PFAM:PF02787.12,KEGG:K01955,TIGR:TIGR02068 Carbamoylphosphate synthase large subunit (split gene in MJ)	7.4	7.1	18.4	13.4	8.1	0	0	0.9	0.9	0	2.2	4.5	0	2.1	2.1	1	0	0	0	0	6.8	0.0555468	0.0630725	NULL
CLST008488 KEGG:K01818,COG:COG2407,TIGR:TIGR01089 L-fucose isomerase and related proteins	2.1	4.7	4.1	5.1	0	0	2.7	2.7	0	0	0	0	0	0	6.2	4.1	0	0	15.9	18.5	2.7	0.409342	0.259152	NULL
CLST008595 TIGR:TIGR01123,KEGG:K00826,COG:COG0115 Branched-chain amino acid aminotransferase/4-amino-4-deoxychorismate lyase	2.1	2.4	5.1	7.2	6.3	7.2	4.5	4.4	0	0	2.2	3.3	0	0	0	0	0	0	0	0	4.8	0.000242642	0.00136193	NULL
CLST008608 TIGR:TIGR01343,COG:COG1048,TIGR:TIGR02086,KEGG:K01681,TIGR:TIGR01342,TIGR:TIGR02083 Aconitase A	8.5	4.7	6.1	8.2	6.3	6.3	2.7	5.3	0	0	0	2.2	0	0	6.2	3	2.3	4.2	0	0	6.2	0.00106529	0.00353756	UP
CLST008679 KEGG:K01803,COG:COG0149,PFAM:PF00121.11,TIGR:TIGR00419 Triosephosphate isomerase	11.7	11.8	8.2	6.2	13.5	10.9	9	6.2	6.4	11	15.4	20.1	18	16	12.4	7.1	0	1.1	11.6	14.1	-2.05	0.334666	0.227418	NULL
CLST008792 TIGR:TIGR01012,COG:COG0052,TIGR:TIGR01011,KEGG:K02967 Ribosomal protein S2	12.7	9.4	7.2	3.1	0	0	2.7	1.8	0	0	17.5	0	0	0	0	0	18	9.5	0	0	2.9	0.190533	0.159684	NULL
CLST009347 KEGG:K00616,TIGR:TIGR00876,COG:COG0176 Transaldolase	24.4	20.1	28.7	15.4	0	0	6.3	6.2	0	0	25.2	41.3	0	0	0	0	19.1	25.3	0	0	10.85	0.302808	0.210649	NULL
CLST009371 KEGG:K02986,COG:COG0522,TIGR:TIGR01017 Ribosomal protein S4 and related proteins	3.2	0	3.1	4.1	0	0	5.4	7.1	0	0	5.5	6.7	0	0	0	0	2.3	3.2	0	0	3.15	0.236865	0.179618	NULL
CLST009425 TIGR:TIGR00002,KEGG:K02959,COG:COG0228 Ribosomal protein S16	9.6	5.9	8.2	7.2	0	0	0	0	0	2.7	17.5	21.2	0	0	0	0	11.3	4.2	0	0	2.95	0.899195	0.427725	NULL
CLST009534 COG:COG0174,KEGG:K01915,TIGR:TIGR00653 Glutamine synthetase	7.4	2.4	0	0	0	0	4.5	3.6	0	0	13.2	14.5	0	0	0	0	7.9	6.3	0	0	1.2	0.965271	0.452424	NULL
CLST009536 TIGR:TIGR01169,COG:COG0081,KEGG:K02863 Ribosomal protein L1	8.5	4.7	2	3.1	0	0	4.5	7.1	0	0	18.6	21.2	0	0	0	0	14.6	9.5	0	0	3.8	0.536406	0.309532	NULL
CLST009537 TIGR:TIGR00855,KEGG:K02935,COG:COG0222 Ribosomal protein L7/L12	20.2	13	11.3	21.6	0.9	0	5.4	8.9	3.7	5.5	48.2	32.4	0	0	0	0	21.4	20.1	0	0	8.25	0.407837	0.259131	NULL
CLST009726 PFAM:PF03894.8,PFAM:PF09363.3,KEGG:K01636,KEGG:K01632,PFAM:PF09364.3,COG:COG3957 Phosphoketolase	18	15.3	15.4	16.5	0	0	10.8	10.7	0	0	20.8	4.5	0	0	0	0	12.4	15.8	0	0	13.05	0.107951	0.102148	NULL
CLST009780 KEGG:K02994,COG:COG0096,PFAM:PF00410.12 Ribosomal protein S8	4.2	0	0	0	0	0	0.9	0	0	0	7.7	13.4	0	0	0	0	9	6.3	0	0	0	0.475603	0.288642	NULL
CLST009787 TIGR:TIGR00060,COG:COG0256,KEGG:K02881 Ribosomal protein L18	7.4	7.1	3.1	2.1	0	0	1.8	0	0	5.5	16.4	27.9	0	0	0	0	12.4	7.4	0	0	1.95	1	0.45953	NULL
CLST009826 TIGR:TIGR00204,COG:COG3959,TIGR:TIGR03186,KEGG:K00615,PFAM:PF00456.14,TIGR:TIGR00232,TIGR:TIGR00759 Transketolase, N-terminal subunit	13.8	2.4	11.3	12.4	4.5	2.7	0	0	0	0	4.4	0	6	2.1	0	0	3.4	0	0	0	3.6	0.0434206	0.0538171	NULL
CLST009866 COG:COG0588,TIGR:TIGR01258,KEGG:K01834 Phosphoglycerate mutase 1	4.2	2.4	4.1	3.1	0	2.7	7.2	6.2	0	0	12.1	16.7	0	0	0	0	3.4	5.3	0	0	3.6	0.156916	0.138086	NULL
CLST010051 PFAM:PF02610.8,COG:COG2160,PFAM:PF11762.1,KEGG:K01804 L-arabinose isomerase	5.3	0	5.1	5.1	0	2.7	0	0	0	0	0	0	1	0	0	2	0	0	18	13.1	1.35	0.513488	0.300363	NULL
CLST010211 TIGR:TIGR01079,COG:COG0198,KEGG:K02895 Ribosomal protein L24	8.5	11.8	11.3	6.2	0	0	6.3	7.1	8.2	7.3	16.4	19	0	0	0	0	25.9	15.8	0	0	3.05	1	0.45953	NULL
CLST010229 KEGG:K02992,TIGR:TIGR01029,COG:COG0049 Ribosomal protein S7	9.6	10.6	3.1	0	0	0	10.8	7.1	0.9	1.8	13.2	10	0	0	0	0	5.6	12.7	0	0	4.65	0.599051	0.333649	NULL
CLST010230 KEGG:K02892,PFAM:PF00276.13,COG:COG0089,TIGR:TIGR03636 Ribosomal protein L23	6.4	8.3	0	3.1	0	0	3.6	2.7	4.6	4.6	9.9	6.7	0	0	0	0	18	19	0	0	0.6	0.777007	0.389146	NULL
CLST010241 TIGR:TIGR00484,KEGG:K02355,COG:COG0480 Translation elongation factors (GTPases)	6.4	2.4	7.2	8.2	0	0	6.3	7.1	0	0	15.4	21.2	0	0	0	0	6.8	6.3	0	0	6.35	0.21607	0.171607	NULL
CLST010274 KEGG:K02990,PFAM:PF01250.10,COG:COG0360 Ribosomal protein S6	9.6	8.3	4.1	6.2	0	0	1.8	2.7	5.5	2.7	16.4	27.9	0	0	0	0	31.5	26.4	0	0	2.05	0.936443	0.442191	NULL
CLST010374 COG:COG0459,KEGG:K04077,TIGR:TIGR02348 Chaperonin GroEL (HSP60 family)	22.3	27.1	13.3	9.3	0.9	0	20.6	17.8	2.7	0	53.7	40.2	0	1.1	0	0	34.9	28.5	0	0	15	0.502828	0.298979	NULL
CLST010437 COG:COG0050,KEGG:K02358,TIGR:TIGR00485,TIGR:TIGR00475 GTPases - translation elongation factors	7.4	5.9	5.1	1	0	0	1.8	7.1	0	0.9	9.9	8.9	0	0	0	0	3.4	3.2	0	0	3.45	0.240852	0.179618	NULL
CLST010471 KEGG:K03530,PFAM:PF00216.14,TIGR:TIGR00988,COG:COG0776 Bacterial nucleoid DNA-binding protein	19.1	28.3	10.2	9.3	0	0	1.8	4.4	11.9	10.1	43.9	45.7	0	4.3	0	0	72.1	69.7	0	0	-0.35	0.843771	0.408442	NULL
CLST010485 KEGG:K02112,COG:COG0055,TIGR:TIGR01039 F0F1-type ATP synthase, beta subunit	2.1	1.2	2	1	0	0	0	2.7	0	0	7.7	16.7	0	0	7.2	6.1	3.4	1.1	0	0	0.55	0.715865	0.372758	NULL
CLST010501 TIGR:TIGR01044,KEGG:K02890,COG:COG0091 Ribosomal protein L22	5.3	5.9	0	0	0	0	0	0	5.5	4.6	16.4	11.2	0	0	0	0	9	7.4	0	0	-2.3	0.206709	0.167003	NULL
CLST010558 COG:COG0203,TIGR:TIGR00059,KEGG:K02879 Ribosomal protein L17	0	5.9	9.2	4.1	0	0	4.5	3.6	1.8	1.8	14.3	15.6	0	0	0	0	2.3	6.3	0	0	2.95	0.5989	0.333649	NULL
CLST010650 COG:COG0148,KEGG:K01689,TIGR:TIGR01060 Enolase	12.7	13	9.2	8.2	0	0	4.5	8.9	0	1.8	20.8	23.4	0	0	0	0	10.1	14.8	0	0	8.55	0.491743	0.293379	NULL
CLST010685 PFAM:PF00342.12,COG:COG0166,KEGG:K01810 Glucose-6-phosphate isomerase	9.6	7.1	6.1	6.2	0	0	0	4.4	0	0	6.6	5.6	0	0	0	0	4.5	4.2	0	0	5.25	0.118203	0.109493	NULL
CLST010706 TIGR:TIGR01171,COG:COG0090,KEGG:K02886 Ribosomal protein L2	6.4	3.5	2	4.1	0	0	0	2.7	0	0	8.8	6.7	0	0	0	0	9	7.4	0	0	2.35	0.767549	0.389146	NULL
CLST010750 KEGG:K04078,PFAM:PF00166.14,COG:COG0234 Co-chaperonin GroES (HSP10)	2.1	4.7	0	2.1	0	0	2.7	1.8	4.6	4.6	17.5	17.9	0	0	0	0	27	13.7	0	0	-0.35	0.598749	0.333649	NULL
CLST010872 KEGG:K02982,TIGR:TIGR01009,COG:COG0092 Ribosomal protein S3	6.4	3.5	0	4.1	0	0	3.6	2.7	0	0	13.2	13.4	0	0	0	0	5.6	0	0	0	3.1	0.33812	0.227891	NULL
CLST010885 TIGR:TIGR01534,COG:COG0057,KEGG:K00134 Glyceraldehyde-3-phosphate dehydrogenase/erythrose-4-phosphate dehydrogenase	13.8	14.2	0	0	0	0	7.2	11.6	2.7	4.6	12.1	13.4	0	0	0	0	12.4	10.6	0	0	2.25	0.710671	0.371152	NULL
CLST010899 COG:COG0268,KEGG:K02968,TIGR:TIGR00029 Ribosomal protein S20	3.2	0	0	0	0	0	0	0	2.7	11	4.4	10	0	0	0	0	10.1	11.6	0	0	-1.35	0.0775142	0.08025	NULL
CLST010945 TIGR:TIGR01192,TIGR:TIGR01187,TIGR:TIGR03375,TIGR:TIGR03410,TIGR:TIGR00958,TIGR:TIGR03265,TIGR:TIGR00968,KEGG:K10243,TIGR:TIGR02203,COG:COG3839,TIGR:TIGR02857 ABC-type sugar transport systems, ATPase components	7.4	8.3	8.2	5.1	0	0	11.7	16.9	0.9	0	9.9	10	1	0	0	0	4.5	2.1	0	0	7.35	0.0865724	0.0852198	NULL
CLST011135 PFAM:PF00162.12,COG:COG0126,KEGG:K00927 3-phosphoglycerate kinase	8.5	11.8	8.2	10.3	0	0	3.6	4.4	0	0	23	23.4	0	0	0	0	13.5	17.9	0	0	6.3	0.536406	0.309532	NULL
CLST011172 COG:COG0539,KEGG:K02945,TIGR:TIGR00717 Ribosomal protein S1	3.2	3.5	7.2	6.2	0	0	4.5	5.3	0	0	15.4	15.6	0	0	0	0	2.3	2.1	0	0	4	0.107951	0.102148	NULL
CLST011216 TIGR:TIGR03630,TIGR:TIGR03635,KEGG:K02961,COG:COG0186 Ribosomal protein S17	6.4	3.5	0	0	0	0	0.9	0.9	5.5	11.9	6.6	5.6	0	0	0	0	12.4	9.5	0	1.1	-2.85	0.274646	0.197297	NULL
CLST011291 COG:COG1592,PFAM:PF02915.10,COG:COG1853,KEGG:K00532,COG:COG0426 Rubrerythrin	0	2.4	0	9.3	11.7	10.9	3.6	4.4	2.7	0	14.3	13.4	4	3.2	3.1	2	0	3.2	0	0	1.1	0.457441	0.283485	NULL
CLST011808 TIGR:TIGR02323,TIGR:TIGR01186,TIGR:TIGR03740,COG:COG1129,KEGG:K10542,PFAM:PF00005.20,TIGR:TIGR02314,TIGR:TIGR03269,TIGR:TIGR02633 ABC-type sugar transport system, ATPase component	0	0	9.2	7.2	3.6	7.2	0	1.8	0	0	3.3	5.6	0	0	8.2	3	3.4	0	0	0	2.7	0.283672	0.202131	NULL
CLST012006 COG:COG0436,KEGG:K10206,TIGR:TIGR03542 Aspartate/tyrosine/aromatic aminotransferase	5.3	5.9	13.3	6.2	3.6	1.8	0	1.8	0	0	5.5	2.2	3	2.1	0	0	5.6	3.2	0	0	3.4	0.0760051	0.0795003	NULL
CLST012022 COG:COG0261,PFAM:PF00829.14,KEGG:K02888 Ribosomal protein L21	5.3	2.4	3.1	3.1	0	0	0.9	0	2.7	2.7	11	21.2	0	0	0	0	9	11.6	0	0	0.3	0.839616	0.408442	NULL
CLST012029 KEGG:K02956,TIGR:TIGR00952,COG:COG0184 Ribosomal protein S15P/S13E	3.2	0	2	0	0	0	0	0	2.7	2.7	5.5	11.2	0	0	0	0	5.6	7.4	0	0	-1.35	0.176889	0.151866	NULL
CLST012513 TIGR:TIGR01024,COG:COG0335,KEGG:K02884 Ribosomal protein L19	0	0	7.2	5.1	0	0	0	0.9	2.7	2.7	15.4	17.9	0	0	0	0	6.8	6.3	0	0	-1.35	0.472655	0.288642	NULL
CLST012648 hypothetical protein	8.5	2.4	5.1	3.1	10.8	16.3	2.7	0	6.4	10.1	15.4	20.1	0	2.1	0	0	0	0	7.4	16.3	-0.15	0.667053	0.356833	NULL
CLST012664 COG:COG0244,KEGG:K02864 Ribosomal protein L10	8.5	8.3	8.2	4.1	0	0	3.6	1.8	2.7	1.8	13.2	20.1	0	0	0	0	11.3	13.7	0	0	2.95	0.749751	0.384416	NULL
CLST012747 COG:COG1544 Ribosome-associated protein Y (PSrp-1)	5.3	7.1	4.1	2.1	0	0	2.7	6.2	0	0	14.3	6.7	0	0	0	0	10.1	7.4	0	0	3.4	0.483495	0.292423	NULL
CLST012764 TIGR:TIGR00012,PFAM:PF00831.16,KEGG:K02904,COG:COG0255 Ribosomal protein L29	7.4	7.1	0	0	0	0	0	2.7	12.8	13.7	20.8	13.4	0	0	0	0	27	17.9	0	0	-6.4	0.220744	0.174161	NULL
CLST012926 COG:COG0088,KEGG:K02926,PFAM:PF00573.15 Ribosomal protein L4	2.1	0	3.1	0	0	0	0	3.6	0	0	17.5	13.4	0	0	0	0	5.6	8.4	0	0	0	0.751359	0.384416	NULL
CLST012960 TIGR:TIGR01064,COG:COG0469,KEGG:K00873 Pyruvate kinase	9.6	10.6	8.2	4.1	0	0	11.7	8	0	0	18.6	22.3	0	0	0	0	11.3	9.5	0	0	8.1	0.343132	0.227891	NULL
CLST013200 TIGR:TIGR03405,COG:COG1012,PFAM:PF00465.12,TIGR:TIGR02638,TIGR:TIGR02518,KEGG:K04072,COG:COG1454 Alcohol dehydrogenase, class IV	24.4	26	9.2	9.3	9.9	10.9	26	29.4	12.8	11.9	15.4	19	8	9.6	7.2	6.1	0	0	16.9	20.7	6.9	0.0969125	0.0937176	NULL
CLST013366 PFAM:PF00465.12,KEGG:K00100,TIGR:TIGR02638,KEGG:K04072,COG:COG1454 Alcohol dehydrogenase, class IV	24.4	31.9	12.3	6.2	14.4	15.4	4.5	6.2	1.8	1.8	2.2	3.3	0	10.7	0	0	0	0	0	0	13.35	0.000447011	0.00207231	UP
CLST013502 PFAM:PF07719.10,TIGR:TIGR02521,PFAM:PF00515.21,NOG:NOG41185 Annotation not available	60.5	86.2	16.4	25.7	18.9	17.2	0.9	0.9	0	0	0	0	64	70.5	43.3	42.6	2.3	1.1	58.2	46.8	-4.4	0.670035	0.356833	NULL
CLST013559 KEGG:K10540,COG:COG1879 ABC-type sugar transport system, periplasmic component	13.8	21.2	7.2	6.2	5.4	7.2	4.5	2.7	1.8	1.8	3.3	12.3	11	21.4	39.2	26.4	11.3	9.5	2.1	5.4	-3.55	0.816758	0.401535	NULL
CLST013665 KEGG:K00522,PFAM:PF00210.17,COG:COG1528 Ferritin-like protein	14.9	27.1	11.3	12.4	1.8	1.8	0	0	0	0	0	0	7	7.5	7.2	7.1	0	0	0	0	6.55	0.0526184	0.061914	NULL
CLST014222 COG:COG2407,PFAM:PF02952.10 L-fucose isomerase and related proteins	29.7	46	56.4	43.2	12.6	13.6	7.2	7.1	0	0	9.9	11.2	21	22.4	1	4.1	0	2.1	2.1	7.6	18.55	0.00961285	0.0167511	UP
CLST014282 KEGG:K03527,COG:COG0539,KEGG:K02945,TIGR:TIGR00717,COG:COG0761,TIGR:TIGR00216,PFAM:PF00575.16,TIGR:TIGR03591 Penicillin tolerance protein	47.8	44.8	30.7	34	12.6	13.6	5.4	6.2	5.5	7.3	25.2	12.3	10	36.3	15.5	14.2	28.2	26.4	9.5	12	8.9	0.417887	0.260809	NULL
CLST014475 TIGR:TIGR01857,KEGG:K01952,COG:COG0047,COG:COG0046 Phosphoribosylformylglycinamidine (FGAM) synthase, synthetase domain	8.5	3.5	7.2	8.2	4.5	4.5	1.8	2.7	0	0	5.5	5.6	2	3.2	3.1	0	0	0	0	3.3	3.5	0.0170497	0.0256474	NULL
CLST014574 TIGR:TIGR00658,KEGG:K00611,TIGR:TIGR03316,COG:COG0078 Ornithine carbamoyltransferase	5.3	2.4	5.1	6.2	0	0	0	0	0	0	0	0	6	2.1	0	0	5.6	3.2	0	0	1.2	0.459188	0.283569	NULL
CLST014941 COG:COG1528 Ferritin-like protein	2.1	0	4.1	5.1	0	0	6.3	8	0	0	0	0	0	3.2	0	3	0	0	5.3	13.1	3.1	0.254244	0.187226	NULL
CLST015356 KEGG:K00925,TIGR:TIGR00016,PFAM:PF00871.10,COG:COG0282 Acetate kinase	5.3	8.3	8.2	5.1	0	0	0	0	0	0	8.8	10	0	0	0	0	2.3	5.3	0	0	2.55	0.60116	0.333767	NULL
CLST017476 TIGR:TIGR01930,COG:COG0183,KEGG:K00626 Acetyl-CoA acetyltransferase	58.4	66.1	44.1	49.4	40.5	39.8	5.4	6.2	6.4	9.2	28.5	19	10	3.2	2.1	6.1	20.3	15.8	9.5	7.6	32.95	0.0278905	0.0371874	UP
CLST018322 PFAM:PF02610.8,COG:COG2160,PFAM:PF11762.1,KEGG:K01804 L-arabinose isomerase	4.2	3.5	3.1	4.1	10.8	14.5	3.6	3.6	0	0	4.4	4.5	2	6.4	0	0	4.5	2.1	3.2	6.5	1.2	0.200973	0.164594	NULL
CLST018911 PFAM:PF01268.12,COG:COG2759,KEGG:K01938 Formyltetrahydrofolate synthetase	29.7	28.3	21.5	19.6	27.9	32.6	16.1	16.9	4.6	8.2	36.2	33.5	16	26.7	9.3	4.1	4.5	5.3	5.3	7.6	16.8	0.0337984	0.044063	UP
CLST020136 COG:COG0052,TIGR:TIGR01011,KEGG:K02967 Ribosomal protein S2	4.2	11.8	5.1	10.3	15.3	11.8	16.1	13.3	0	1.8	2.2	1.1	0	0	0	2	0	0	0	0	11.8	0.000152024	0.00127311	UP
CLST020880 KEGG:K04027,PFAM:PF00936.12,COG:COG4577 Carbon dioxide concentrating mechanism/carboxysome shell protein	28.7	41.3	14.3	13.4	67.5	45.3	18.8	23.1	52.9	55.9	31.8	45.7	21	25.6	24.7	34.5	12.4	6.3	36	33.7	-6.85	0.787137	0.389146	NULL
CLST021087 KEGG:K02939,PFAM:PF01281.12,COG:COG0359 Ribosomal protein L9	6.4	5.9	4.1	5.1	0	0	1.8	0	2.7	2.7	35.1	15.6	0	0	0	0	12.4	11.6	0	0	1.6	0.967726	0.452424	NULL
CLST021265 KEGG:K00174,COG:COG1014,TIGR:TIGR03710,COG:COG0674 Pyruvate:ferredoxin oxidoreductase and related 2-oxoacid:ferredoxin oxidoreductases, alpha subunit	13.8	11.8	3.1	12.4	3.6	4.5	2.7	0	0	0	0	0	0	0	15.5	13.2	0	0	2.1	6.5	4.05	0.0687656	0.0729081	NULL
CLST021433 COG:COG2407 L-fucose isomerase and related proteins	5.3	3.5	1	2.1	9	10.9	6.3	5.3	16.4	14.7	7.7	3.3	3	3.2	5.2	0	0	0	2.1	0	2.2	0.24502	0.181191	NULL
CLST022770 PFAM:PF00441.17,COG:COG1960,KEGG:K00257,KEGG:K00022,TIGR:TIGR03207,PFAM:PF02771.9,PFAM:PF02770.12,KEGG:K00248 Acyl-CoA dehydrogenases	42.5	47.2	68.6	65.9	45	42.6	24.2	17.8	5.5	7.3	8.8	12.3	18	18.2	5.2	9.1	41.7	49.6	10.6	12	32.5	0.00381353	0.00818514	UP
CLST022892 KEGG:K02906,TIGR:TIGR03626,COG:COG0087,TIGR:TIGR03625 Ribosomal protein L3	7.4	5.9	10.2	8.2	1.8	6.3	1.8	1.8	0	0	0	2.2	0	1.1	4.1	1	0	0	2.1	3.3	5.6	0.00543679	0.0109986	UP
CLST025157 COG:COG2086,PFAM:PF01012.14,KEGG:K03521 Electron transfer flavoprotein, beta subunit	34	44.8	45.1	30.9	40.5	45.3	22.4	24	1.8	3.7	4.4	5.6	6	8.5	13.4	9.1	19.1	27.4	5.3	5.4	31.45	0.000447431	0.00207231	UP
CLST025643 NOG:NOG122670 Annotation not available	6.4	5.9	2	9.3	3.6	4.5	0	0	0	0	0	0	0	3.2	0	0	5.6	9.5	6.3	4.4	4.05	0.240852	0.179618	NULL
CLST025663 KEGG:K02112,PFAM:PF02874.16,COG:COG0055,TIGR:TIGR01039 F0F1-type ATP synthase, beta subunit	9.6	13	12.3	7.2	4.5	4.5	0	0.9	0	0	5.5	8.9	2	3.2	10.3	9.1	9	6.3	0	0	1.5	0.331	0.226677	NULL
CLST027427 COG:COG1109,PFAM:PF02878.9,KEGG:K01840,PFAM:PF02879.9,KEGG:K01835 Phosphomannomutase	10.6	7.1	6.1	9.3	2.7	5.4	4.5	3.6	0	0	7.7	5.6	0	2.1	0	1	0	0	0	0	5.75	0.00279782	0.00665427	UP
CLST027736 COG:COG0056,TIGR:TIGR00962,KEGG:K02111 F0F1-type ATP synthase, alpha subunit	8.5	9.4	5.1	7.2	1.8	3.6	0	0	1.8	3.7	5.5	8.9	2	3.2	4.1	0	4.5	11.6	0	0	0.9	0.755746	0.38554	NULL
CLST028489 TIGR:TIGR02279,PFAM:PF00725.15,COG:COG1250,KEGG:K00074,TIGR:TIGR02441,PFAM:PF02737.11 3-hydroxyacyl-CoA dehydrogenase	62.6	85	62.5	61.8	45	39.8	25.1	19.6	6.4	5.5	17.5	20.1	17	10.7	10.3	8.1	16.9	13.7	0	0	42.9	0.000332073	0.00166985	UP
CLST029099 COG:COG3968,PFAM:PF12437.1,KEGG:K01915 Uncharacterized protein related to glutamine synthetase	5.3	5.9	6.1	11.3	0.9	1.8	0	0	0	0	0	0	0	0	0	0	2.3	2.1	0	0	3.55	0.0102029	0.0176051	NULL
CLST029829 COG:COG1653 ABC-type sugar transport system, periplasmic component	19.1	18.9	3.1	5.1	0	0	0	0	0	0	8.8	8.9	0	0	0	0	6.8	5.3	0	0	1.55	0.513689	0.300363	NULL
CLST030711 KEGG:K00615,COG:COG0021,TIGR:TIGR00232 Transketolase	11.7	5.9	8.2	2.1	0	0	7.2	6.2	0	0	16.4	8.9	0	0	0	0	9	5.3	0	0	6.05	0.231971	0.177508	NULL
CLST031440 COG:COG0244,KEGG:K02864,PFAM:PF00466.13 Ribosomal protein L10	0	1.2	0	0	0	0	3.6	6.2	10	6.4	0	4.5	3	4.3	12.4	0	0	0	0	0	-1.5	0.375216	0.242787	NULL
CLST031594 KEGG:K03545,TIGR:TIGR00115,COG:COG0544 FKBP-type peptidyl-prolyl cis-trans isomerase (trigger factor)	9.6	5.9	3.1	4.1	0	0	0	0	0	0	8.8	13.4	0	0	0	0	4.5	2.1	0	0	1.55	0.571378	0.322316	NULL
CLST032984 PFAM:PF07719.10,TIGR:TIGR02521,NOG:NOG41185 Annotation not available	53.1	69.6	42	35	27	23.5	59.2	57	0	0	0	0	48	70.5	95.9	92.4	100.2	99.2	111.1	114.2	-33.9	0.373144	0.242503	NULL
CLST032986 COG:COG1629,NOG:NOG122779,NOG:NOG85156 Receptor	0	0	2	0	0	0	1.8	1.8	0	0	0	0	52	67.3	21.6	25.4	0	0	0	0	0	0.751235	0.384416	NULL
CLST033144 KEGG:K01818,COG:COG2407,TIGR:TIGR01089 L-fucose isomerase and related proteins	10.6	10.6	6.1	7.2	15.3	15.4	1.8	3.6	9.1	7.3	9.9	14.5	18	29.9	6.2	3	0	0	16.9	18.5	-0.6	0.671089	0.356833	NULL
CLST033650 NOG:NOG114810 Receptor	4.2	3.5	7.2	6.2	1.8	4.5	0	0	0	0	0	0	7	6.4	0	0	16.9	12.7	3.2	4.4	2.25	0.780257	0.389146	NULL
CLST033903 KEGG:K01209,COG:COG3534 Alpha-L-arabinofuranosidase	2.1	0	11.3	8.2	0	1.8	0	0	0	0	0	0	0	0	0	0	7.9	5.3	7.4	4.4	0.9	0.513689	0.300363	NULL
CLST033904 KEGG:K03522,PFAM:PF01012.14,COG:COG2025,PFAM:PF00766.12 Electron transfer flavoprotein, alpha subunit	41.4	23.6	0	0	8.1	7.2	5.4	1.8	0	0	0	0	0	0	0	0	0	0	0	12	6.3	0.00576067	0.0115213	UP
CLST035558 PFAM:PF00342.12,COG:COG0166,KEGG:K01810 Glucose-6-phosphate isomerase	17	15.3	52.3	55.6	4.5	5.4	2.7	0	0	0	17.5	26.8	12	7.5	5.2	6.1	20.3	19	3.2	3.3	3.55	0.786823	0.389146	NULL
CLST036379 KEGG:K03615,TIGR:TIGR01945,COG:COG4656 Predicted NADH:ubiquinone oxidoreductase, subunit RnfC	1.1	0	2	2.1	5.4	7.2	0	1.8	0	0	0	0	4	5.3	5.2	4.1	4.5	4.2	8.5	10.9	-2.25	0.557603	0.317599	NULL
CLST037101 COG:COG0050,KEGG:K02358,TIGR:TIGR00485 GTPases - translation elongation factors	0	0	1	2.1	2.7	1.8	9.9	6.2	6.4	4.6	11	12.3	0	0	0	0	1.1	1.1	0	0	1.4	0.604233	0.334419	NULL
CLST037159 TIGR:TIGR01049,COG:COG0051,KEGG:K02946 Ribosomal protein S10	0	2.4	5.1	0	0	0	0	0	11.9	10.1	5.5	11.2	0	0	0	0	0	0	0	3.3	0	0.297842	0.208017	NULL
CLST037194 COG:COG1152,TIGR:TIGR00316,COG:COG1614,KEGG:K11174,PFAM:PF03598.8 CO dehydrogenase/acetyl-CoA synthase beta subunit	21.2	20.1	17.4	20.6	9.9	6.3	3.6	0	0	0	11	16.7	3	9.6	0	0	0	0	0	2.2	13.65	0.0134733	0.0213631	UP
CLST037225 KEGG:K01190,PFAM:PF02837.11,COG:COG3250,PFAM:PF02836.10 Beta-galactosidase/beta-glucuronidase	6.4	3.5	3.1	6.2	0	0	1.8	1.8	0	0	0	0	3	4.3	4.1	3	7.9	5.3	18	14.1	-1.1	0.666932	0.356833	NULL
CLST037234 TIGR:TIGR01049,COG:COG0051,KEGG:K02946 Ribosomal protein S10	4.2	3.5	5.1	3.1	7.2	9.1	4.5	5.3	0	0	0	0	0	0	0	0	0	0	0	0	4.8	3.52914e-05	0.000690143	NULL
CLST037426 KEGG:K10794,NOG:NOG135588 Proline reductase	4.2	9.4	0	5.1	10.8	14.5	0	0	2.7	1.8	3.3	4.5	9	7.5	0	0	0	0	0	0	3.75	0.209934	0.168466	NULL
CLST038347 COG:COG1538,PFAM:PF02321.11,TIGR:TIGR01845,TIGR:TIGR01844 Outer membrane protein	9.6	9.4	5.1	0	0.9	0	0	0	0	0	0	0	16	18.2	1	1	0	0	0	0	0.45	0.631816	0.343297	NULL
CLST038362 NOG:NOG10616 Annotation not available	31.8	37.8	29.7	24.7	26.1	16.3	21.5	16.9	1.8	1.8	4.4	3.3	0	0	0	0	1.1	0	0	0	25.4	0.000179783	0.00127311	UP
CLST039133 COG:COG2885 Outer membrane protein and related peptidoglycan-associated (lipo)proteins	5.3	9.4	7.2	5.1	0	1.8	0	0	0	0	0	0	5	4.3	0	2	0	0	0	0	3.45	0.0553942	0.0630725	NULL
CLST039744 PFAM:PF00465.12,KEGG:K00100,TIGR:TIGR02638,KEGG:K04072,COG:COG1454 Alcohol dehydrogenase, class IV	4.2	0	6.1	6.2	3.6	5.4	1.8	1.8	4.6	5.5	2.2	1.1	2	6.4	4.1	9.1	0	0	2.1	3.3	1.15	0.846769	0.408442	NULL
CLST039879 TIGR:TIGR02176,COG:COG1014,KEGG:K03737,COG:COG0674,COG:COG1013 Pyruvate:ferredoxin oxidoreductase and related 2-oxoacid:ferredoxin oxidoreductases, beta subunit	134.8	188.8	60.5	72.1	66.6	54.3	67.2	59.6	5.5	5.5	12.1	23.4	5	8.5	19.6	15.2	21.4	16.9	0	0	56.6	0.000244969	0.00136193	UP
CLST039979 KEGG:K01849,TIGR:TIGR00640,COG:COG2185 Methylmalonyl-CoA mutase, C-terminal domain/subunit (cobalamin-binding)	10.6	10.6	0	0	0	0	0	0	0	0	0	0	0	0	24.7	25.4	0	0	0	0	0	0.868418	0.414253	NULL
CLST040032 COG:COG0686,KEGG:K00259,TIGR:TIGR00518 Alanine dehydrogenase	4.2	2.4	10.2	14.4	2.7	4.5	4.5	3.6	0	0	0	0	0	0	11.3	7.1	0	0	0	2.2	4.35	0.00524232	0.0107285	NULL
CLST041321 NOG:NOG125726 Receptor	0	0	0	0	0	0	0	0	0	0	0	0	24	27.8	0	0	0	0	7.4	13.1	0	0.0871566	0.0852198	NULL
CLST042835 TIGR:TIGR03627,COG:COG0103,KEGG:K02996,PFAM:PF00380.12 Ribosomal protein S9	9.6	11.8	8.2	5.1	18.9	20.8	4.5	8.9	0	1.8	4.4	3.3	0	0	0	0	0	0	0	0	9.25	0.000121971	0.00127311	UP
CLST043010 TIGR:TIGR00641,KEGG:K01848,COG:COG1884 Methylmalonyl-CoA mutase, N-terminal domain/subunit	18	9.4	5.1	9.3	2.7	2.7	5.4	6.2	0	0	0	0	0	0	20.6	13.2	0	0	0	0	5.8	0.00735635	0.014073	UP
CLST045167 NOG:NOG137753 Annotation not available	0	0	5.1	8.2	0	3.6	8.1	7.1	0	0	1.1	0	0	0	64.9	65	0	0	0	0	4.35	0.191482	0.15972	NULL
CLST045824 KEGG:K02112,KEGG:K02133,COG:COG0055,TIGR:TIGR01039 F0F1-type ATP synthase, beta subunit	12.7	13	10.2	13.4	18.9	17.2	13.4	8.9	1.8	0.9	1.1	1.1	0	3.2	0	0	2.3	1.1	0	0	12.2	0.000215905	0.00136193	UP
CLST048428 COG:COG3525,KEGG:K12373,PFAM:PF00728.15 N-acetyl-beta-hexosaminidase	5.3	8.3	5.1	6.2	3.6	5.4	7.2	8	0	0	0	0	19	23.5	30.9	25.4	11.3	6.3	6.3	5.4	-0.5	0.698378	0.366301	NULL
CLST048596 NOG:NOG77711 Annotation not available	0	0	5.1	5.1	1.8	2.7	0	0	0	0	0	0	0	0	2.1	3	5.6	3.2	6.3	0	0.9	0.966303	0.452424	NULL
CLST049433 COG:COG0050,KEGG:K02358,TIGR:TIGR00485 GTPases - translation elongation factors	14.9	23.6	34.8	34	56.7	39.8	39.4	40	0	0	50.4	65.8	0	0	0	0	0	1.1	0	0	37.1	0.00856802	0.0158734	UP
CLST049721 KEGG:K01803,COG:COG0149,PFAM:PF00121.11 Triosephosphate isomerase	4.2	7.1	24.6	22.7	12.6	22.6	0	0	0	0	2.2	0	19	26.7	22.7	17.3	13.5	9.5	0	0	4	0.580934	0.32666	NULL
CLST050035 KEGG:K03286,COG:COG2885,TIGR:TIGR02802 Outer membrane protein and related peptidoglycan-associated (lipo)proteins	1.1	1.2	34.8	31.9	13.5	7.2	3.6	3.6	15.5	22	0	0	13	18.2	44.3	38.6	33.8	32.7	0	2.2	-11.45	0.615364	0.337396	NULL
CLST050181 NOG:NOG118395,NOG:NOG125607 Receptor	2.1	7.1	7.2	6.2	0	0	0	0	0	0	0	0	28	43.8	4.1	6.1	0	0	0	0	1.05	0.631979	0.343297	NULL
CLST050642 TIGR:TIGR01322,KEGG:K01212,COG:COG1621,PFAM:PF00251.13 Beta-fructosidases (levanase/invertase)	0	0	0	0	0	0	0	0	0	0	0	0	0	0	0	0	7.9	5.3	20.1	21.8	0	0.0871566	0.0852198	NULL
CLST050781 NOG:NOG148246 Receptor	0	0	0	4.1	0	0	0	0	0	0	0	0	30	22.4	0	2	0	0	20.1	12	0	0.153642	0.135884	NULL
CLST050815 NOG:NOG05973 Integration host factor	0	0	0	0	0	0	0	0	10	11.9	7.7	8.9	0	0	5.2	5.1	3.4	6.3	0	0	-5.15	0.0060874	0.0117734	DOWN
CLST051192 NOG:NOG137892 Annotation not available	0	0	7.2	9.3	0	0	0	0	0	0	0	0	0	2.1	0	0	11.3	13.7	29.6	27.2	0	0.341836	0.227891	NULL
CLST051405 COG:COG1151,KEGG:K00198,PFAM:PF03063.13,TIGR:TIGR01702 6Fe-6S prismane cluster-containing protein	11.7	21.2	6.1	9.3	9	9.1	7.2	6.2	0	2.7	5.5	16.7	0	0	0	0	0	0	0	0	9.05	0.00105318	0.00353756	UP
CLST052683 NOG:NOG71724 Tonb-Dependent protein	6.4	0	3.1	0	0	0	0	0	0	0	0	0	16	12.8	7.2	8.1	3.4	3.2	12.7	14.1	-5.3	0.0355466	0.0460015	DOWN
CLST053105 NOG:NOG12793 Calcium ion binding protein	0	0	113.7	149.3	4.5	5.4	0	2.7	0	0	0	6.7	0	0	225.7	215.2	39.4	35.9	41.2	38.1	-17.7	0.690225	0.365903	NULL
CLST053106 NOG:NOG145290,NOG:NOG120581 Avirulence protein	0	0	0	0	4.5	4.5	0	0	0	0	0	0	0	0	8.2	8.1	0	3.2	543.7	574.3	0	0.341586	0.227891	NULL
CLST053648 PFAM:PF01431.14,KEGG:K07386,PFAM:PF05649.6,COG:COG3590 Predicted metalloendopeptidase	4.2	0	4.1	0	2.7	3.6	1.8	0	0	0	0	0	5	7.5	16.5	10.1	15.8	15.8	0	4.4	-2.45	0.231646	0.177508	NULL
CLST054695 NOG:NOG76270 Annotation not available	4.2	2.4	10.2	11.3	5.4	1.8	8.1	2.7	0	0	0	0	0	0	13.4	7.1	11.3	14.8	0	0	4.8	0.129748	0.118936	NULL
CLST056233 KEGG:K02014,NOG:NOG85156 Receptor	0	0	17.4	18.5	8.1	6.3	0	0	0	0	0	0	0	0	6.2	3	9	6.3	10.6	18.5	1.65	0.772759	0.389146	NULL
CLST056251 COG:COG0822 NifU homolog involved in Fe-S cluster formation	18	14.2	17.4	24.7	23.4	23.5	37.7	36.5	1.8	1.8	2.2	6.7	0	0	0	0	1.1	0	0	0	23.45	0.000179783	0.00127311	UP
CLST056529 NOG:NOG75757 Receptor	5.3	2.4	0	0	1.8	1.8	0	0	0	0	0	0	12	17.1	23.7	19.3	11.3	7.4	0	0	-2.8	0.342925	0.227891	NULL
CLST057430 COG:COG1538,PFAM:PF02321.11 Outer membrane protein	3.2	0	2	0	0	0	0	0	0	0	0	0	16	24.6	17.5	16.2	0	0	8.5	10.9	-4.25	0.127531	0.117516	NULL
CLST057790 NOG:NOG38873 Annotation not available	0	0	0	0	0	0	0	0	0	0	0	0	9	15	9.3	14.2	11.3	10.6	7.4	9.8	-9.15	0.0060874	0.0117734	DOWN
CLST057873 NOG:NOG120039 Annotation not available	0	0	0	0	0	0	0	0	0	0	0	0	7	6.4	2.1	3	0	0	8.5	17.4	-1.05	0.0253979	0.0351971	NULL
CLST058525 NOG:NOG85887,TIGR:TIGR01783 Receptor	10.6	11.8	0	0	0	0	0	0	0	0	0	0	7	16	0	0	0	0	0	0	0	0.699302	0.366301	NULL
CLST059054 NOG:NOG85887 Receptor	14.9	17.7	25.6	15.4	5.4	3.6	4.5	6.2	0	0	0	0	40	57.7	36.1	40.6	22.5	25.3	48.7	44.6	-20.15	0.295799	0.207581	NULL
CLST059362 NOG:NOG86857 Annotation not available	20.2	5.9	12.3	13.4	10.8	9.1	9	8.9	0	0	0	0	33	33.1	45.4	41.6	23.6	32.7	58.2	52.2	-22.9	0.229995	0.177508	NULL
CLST060857 NOG:NOG77793,NOG:NOG85156,NOG:NOG39872 Receptor	0	0	27.7	19.6	0	0	0	0	0	0	0	0	12	7.5	0	0	31.5	31.7	48.7	34.8	-3.75	0.23976	0.179618	NULL
CLST061817 NOG:NOG72509 Tonb-Dependent outer membrane protein	4.2	7.1	0	0	0	0	0	0	0	0	0	0	12	3.2	7.2	6.1	0	0	10.6	6.5	-1.6	0.23976	0.179618	NULL
CLST062151 COG:COG0071 Molecular chaperone (small heat shock protein)	0	0	4.1	4.1	0	0	0	0	0	0	0	6.7	12	31	7.2	5.1	2.3	0	0	0	-1.15	0.176889	0.151866	NULL
CLST062892 COG:COG1528 Ferritin-like protein	3.2	0	11.3	10.3	0	0	2.7	4.4	0	0	0	0	0	0	11.3	7.1	0	0	14.8	20.7	2.95	0.612197	0.336968	NULL
CLST065323 hypothetical protein	4.2	0	0	0	0	0	0	0	0	0	0	0	5	6.4	20.6	15.2	2.3	2.1	6.3	3.3	-2.8	0.0252226	0.0351971	NULL
CLST067449 TIGR:TIGR02336,NOG:NOG26044,PFAM:PF09508.3 Annotation not available	7.4	13	5.1	6.2	0	0	0	0	0	2.7	0	0	0	0	0	2	0	0	0	0	2.55	0.0636219	0.0678634	NULL
CLST069079 hypothetical protein	6.4	4.7	0	0	0	0	0	0	0	0	0	0	6	4.3	5.2	5.1	4.5	7.4	0	0	-2.15	0.360535	0.23677	NULL
CLST069117 COG:COG1410 Methionine synthase I, cobalamin-binding domain	25.5	23.6	13.3	16.5	14.4	12.7	8.1	7.1	6.4	5.5	6.6	4.5	15	26.7	8.2	3	0	0	0	4.4	8.85	0.0120319	0.0196366	UP
CLST070216 PFAM:PF04060.6,COG:COG1456,KEGG:K00197 CO dehydrogenase/acetyl-CoA synthase gamma subunit (corrinoid Fe-S protein)	0	8.3	6.1	0	5.4	0	0	6.2	0	0	15.4	12.3	0	4.3	0	0	0	0	0	0	2.7	0.389781	0.25037	NULL
CLST070410 TIGR:TIGR01235,COG:COG5016,PFAM:PF00364.15,KEGG:K01941,TIGR:TIGR02712,KEGG:K01960,KEGG:K01571,COG:COG0511 Biotin carboxyl carrier protein	7.4	5.9	4.1	6.2	10.8	7.2	3.6	0	1.8	0	6.6	5.6	8	10.7	0	0	0	0	2.1	3.3	4.1	0.117877	0.109493	NULL
CLST076100 TIGR:TIGR00641,PFAM:PF01642.15,TIGR:TIGR00640,KEGG:K01847,COG:COG1884 Methylmalonyl-CoA mutase, N-terminal domain/subunit	0	2.4	16.4	12.4	13.5	10	0	2.7	0	0	0	0	0	0	0	0	0	0	0	0	6.35	0.000733547	0.0027469	UP
CLST076163 KEGG:K00925,TIGR:TIGR00016,COG:COG0282 Acetate kinase	4.2	7.1	7.2	4.1	0	5.4	2.7	1.8	0	0	6.6	11.2	0	0	0	0	4.5	5.3	0	0	4.15	0.114728	0.107979	NULL
CLST077039 NOG:NOG08358,PFAM:PF12225.1,KEGG:K03615,TIGR:TIGR01945,COG:COG4656 Methylenetetrahydrofolate reductase	3.2	3.5	0	0	5.4	9.1	1.8	1.8	0	0	11	6.7	2	0	0	0	0	0	0	0	2.5	0.0994439	0.0956401	NULL
CLST077810 PFAM:PF07554.6,NOG:NOG10337 Protein involved in biological adhesion	0	0	0	0	0	0	9.9	8	10	9.2	0	0	0	0	0	0	0	3.2	0	0	0	1	0.45953	NULL
CLST077828 NOG:NOG86717 Annotation not available	0	0	0	0	0	0	0	0	0	0	0	0	0	0	16.5	7.1	20.3	17.9	0	0	0	0.0871566	0.0852198	NULL
CLST078011 COG:COG2086,KEGG:K03521 Electron transfer flavoprotein, beta subunit	24.4	23.6	5.1	6.2	12.6	13.6	12.6	27.6	0.9	2.7	0	0	0	0	0	0	0	0	0	0	13.1	8.95414e-05	0.00122073	UP
CLST078597 TIGR:TIGR02521,NOG:NOG41185 Annotation not available	0	0	0	0	0	0	7.2	5.3	0	0	0	0	0	0	19.6	22.3	0	0	21.2	19.6	0	0.475351	0.288642	NULL
CLST079087 COG:COG0244,KEGG:K02864,PFAM:PF00466.13 Ribosomal protein L10	5.3	9.4	0	0	10.8	0	9	0	0	2.7	0	5.6	6	16	6.2	0	0	0	0	5.4	1.3	0.772949	0.389146	NULL
CLST080743 hypothetical protein	2.1	5.9	0	0	0	0	7.2	5.3	0	0	0	0	0	0	0	0	0	0	6.3	5.4	1.05	0.167825	0.146224	NULL
CLST081014 COG:COG0459,KEGG:K04077,TIGR:TIGR02348 Chaperonin GroEL (HSP60 family)	4.2	5.9	42	36	7.2	4.5	34.1	27.6	0	0	16.4	22.3	0	1.1	0	0	0	5.3	0	0	17.4	0.00279782	0.00665427	UP
CLST082099 KEGG:K03286,COG:COG2885 Outer membrane protein and related peptidoglycan-associated (lipo)proteins	19.1	24.8	0	0	17.1	10	0.9	1.8	0	0	0	0	0	0	7.2	9.1	0	0	3.2	3.3	5.9	0.05272	0.061914	NULL
CLST084963 NOG:NOG85428,KEGG:K11934 Annotation not available	0	0	4.1	2.1	0	0	0	0	0	0	0	0	0	0	0	0	11.3	11.6	5.3	6.5	0	0.475603	0.288642	NULL
CLST085794 KEGG:K02992,TIGR:TIGR01029,COG:COG0049 Ribosomal protein S7	0	0	6.1	4.1	0.9	1.8	11.7	11.6	0	0	7.7	14.5	0	0	0	0	0	0	0	0	2.95	0.0407178	0.0510553	NULL
CLST086074 TIGR:TIGR03850 bind_CPR_0540: carbohydrate ABC transporter substrate-binding protein, CPR_0540 family	30.8	50.8	14.3	12.4	1.8	8.2	0	0	0	0	0	0	0	0	0	0	0	0	0	0	10.3	0.000733547	0.0027469	UP
CLST086114 KEGG:K02990,PFAM:PF01250.10,COG:COG0360 Ribosomal protein S6	0	0	0	0	0	0	0	0	9.1	13.7	8.8	5.6	0	0	5.2	6.1	2.3	0	3.2	0	-4.2	0.0060874	0.0117734	NULL
CLST086838 TIGR:TIGR00484,KEGG:K02355,COG:COG0480 Translation elongation factors (GTPases)	0	0	22.5	14.4	9	12.7	5.4	2.7	0	0	14.3	14.5	0	0	0	0	3.4	2.1	0	0	7.2	0.0763384	0.0795003	NULL
CLST088249 NOG:NOG124709,NOG:NOG85156 Receptor	12.7	7.1	35.9	43.2	0	0	0	3.6	0	0	0	0	0	0	4.1	4.1	0	0	0	0	5.35	0.0264811	0.0359572	UP
CLST092497 hypothetical protein	2.1	3.5	32.8	20.6	0	0	1.8	4.4	0	0	0	0	0	0	8.2	8.1	0	0	0	0	2.8	0.0263813	0.0359572	NULL
CLST092959 TIGR:TIGR00651,KEGG:K00625,COG:COG0280 Phosphotransacetylase	9.6	9.4	7.2	3.1	10.8	7.2	0	0	0	0	6.6	14.5	9	3.2	0	1	4.5	2.1	2.1	0	5.1	0.225191	0.176149	NULL
CLST093715 NOG:NOG12793,NOG:NOG114620 Receptor	7.4	10.6	0	3.1	0	0	0	0	0	0	0	0	6	6.4	0	0	0	0	0	0	0	0.287025	0.202877	NULL
CLST098622 PFAM:PF00465.12,KEGG:K00100,TIGR:TIGR02638,KEGG:K04072,COG:COG1454 Alcohol dehydrogenase, class IV	3.2	0	27.7	30.9	10.8	10.9	4.5	0	0	0	35.1	15.6	0	0	0	0	0	0	0	0	7.65	0.0407178	0.0510553	NULL
CLST100313 COG:COG0098,KEGG:K02988,TIGR:TIGR01021 Ribosomal protein S5	0	0	2	0	11.7	8.2	8.1	5.3	0	0	4.4	2.2	0	0	0	0	0	0	0	0	3.65	0.0265593	0.0359572	NULL
CLST104114 hypothetical protein	0	0	0	0	3.6	6.3	4.5	3.6	0	0	0	0	38	39.5	20.6	24.4	0	0	0	0	1.8	1	0.45953	NULL
CLST105138 PFAM:PF03764.11,PFAM:PF00679.17,TIGR:TIGR00484,KEGG:K02355,COG:COG0480,TIGR:TIGR00490 Translation elongation factors (GTPases)	5.3	3.5	3.1	0	3.6	4.5	1.8	0.9	0.9	0.9	6.6	8.9	9	7.5	0	2	5.6	3.2	0	0	0.7	0.816008	0.401535	NULL
CLST105181 NOG:NOG84426 Annotation not available	0	0	0	0	0	0	0	0	0	0	0	0	7	12.8	3.1	0	0	0	6.3	6.5	0	0.048014	0.058279	NULL
CLST106295 COG:COG0088,KEGG:K02926,PFAM:PF00573.15 Ribosomal protein L4	8.5	11.8	0	0	11.7	10.9	8.1	8	2.7	3.7	0	0	0	0	0	0	0	0	0	0	8.3	0.00353193	0.00777024	UP
CLST110447 COG:COG0088,KEGG:K02926,PFAM:PF00573.15 Ribosomal protein L4	5.3	10.6	13.3	13.4	7.2	4.5	0	0	0	0	4.4	6.7	0	0	3.1	4.1	0	0	0	0	6.25	0.0150234	0.022891	UP
CLST111982 COG:COG0459,KEGG:K04077,TIGR:TIGR02348 Chaperonin GroEL (HSP60 family)	59.4	68.5	3.1	2.1	7.2	10	5.4	5.3	5.5	6.4	0	0	0	0	0	0	0	0	0	0	6.3	0.00112931	0.00367482	UP
CLST112828 COG:COG0050,KEGG:K02358,TIGR:TIGR00485 GTPases - translation elongation factors	40.3	40.1	5.1	5.1	17.1	15.4	13.4	11.6	8.2	8.2	0	0	0	0	0	0	0	0	0	0	14.4	0.000331979	0.00166985	UP
CLST113150 TIGR:TIGR00484,KEGG:K02355,COG:COG0480 Translation elongation factors (GTPases)	22.3	31.9	12.3	11.3	11.7	13.6	32.3	34.7	0	0	0	0	0	0	0	0	0	0	0	0	17.95	3.52914e-05	0.000690143	UP
CLST114283 TIGR:TIGR01842,KEGG:K10112,TIGR:TIGR01187,TIGR:TIGR02315,TIGR:TIGR00958,TIGR:TIGR03265,TIGR:TIGR02203,COG:COG3839,TIGR:TIGR02204 ABC-type sugar transport systems, ATPase components	48.8	53.1	6.1	10.3	18.9	20.8	26	21.4	0	0	0	0	0	0	0	0	0	0	0	0	21.1	3.52914e-05	0.000690143	UP
CLST115339 KEGG:K01006,TIGR:TIGR01828,COG:COG0574 Phosphoenolpyruvate synthase/pyruvate phosphate dikinase	70.1	99.1	10.2	4.1	48.6	54.3	44.8	38.3	15.5	22	5.5	6.7	0	0	0	0	0	0	0	0	46.7	0.000939782	0.00330803	UP
CLST116150 hypothetical protein	7.4	9.4	9.2	14.4	0	0	0	0	0	0	0	0	0	0	0	0	0	0	22.2	31.5	3.7	0.274013	0.197297	NULL
CLST118352 TIGR:TIGR01859,COG:COG0191,KEGG:K01624 Fructose/tagatose bisphosphate aldolase	25.5	37.8	10.2	13.4	6.3	10	1.8	0	4.6	5.5	0	0	0	0	0	1	0	1.1	0	0	10.1	0.00241926	0.00617088	UP
CLST118599 PFAM:PF00441.17,COG:COG1960,KEGG:K00257,PFAM:PF02771.9,PFAM:PF02770.12,KEGG:K00248 Acyl-CoA dehydrogenases	78.5	99.1	32.8	33	27.9	30.8	16.1	18.7	7.3	8.2	0	0	0	0	0	0	0	0	0	0	31.8	9.01678e-05	0.00122073	UP
CLST119502 PFAM:PF00162.12,COG:COG0126,KEGG:K00927 3-phosphoglycerate kinase	13.8	16.5	2	3.1	0	0.9	9	7.1	0	0	0	0	0	0	0	0	0	0	0	0	5.1	0.000172025	0.00127311	UP
CLST120459 KEGG:K04078,PFAM:PF00166.14,COG:COG0234 Co-chaperonin GroES (HSP10)	3.2	0	4.1	4.1	0	0	2.7	1.8	13.7	11.9	3.3	4.5	0	0	9.3	6.1	6.8	3.2	0	0	-1.65	0.179873	0.153678	NULL
CLST120578 TIGR:TIGR00855,KEGG:K02935,COG:COG0222 Ribosomal protein L7/L12	0	0	0	1	0	0	0	0	15.5	16.5	9.9	5.6	0	0	0	4.1	2.3	3.2	0	0	-2.75	0.0294796	0.0387195	NULL
CLST127627 KEGG:K04043,COG:COG0443,TIGR:TIGR02350 Molecular chaperone	42.5	37.8	7.2	4.1	14.4	18.1	30.5	19.6	1.8	2.7	0	0	0	0	0	0	0	0	0	0	18.85	9.01678e-05	0.00122073	UP
CLST128315 PFAM:PF01799.13,TIGR:TIGR03194,TIGR:TIGR02963,COG:COG1529,COG:COG2080,TIGR:TIGR03311,TIGR:TIGR03193,TIGR:TIGR03196,TIGR:TIGR02969,KEGG:K07469,TIGR:TIGR03313,TIGR:TIGR02965 Aerobic-type carbon monoxide dehydrogenase, large subunit CoxL/CutL homologs	2.1	5.9	3.1	2.1	10.8	11.8	2.7	5.3	0	0	6.6	7.8	0	0	0	0	0	2.1	0	0	4.2	0.00518638	0.0107285	NULL
CLST129603 COG:COG1185,KEGG:K00962,TIGR:TIGR03591 Polyribonucleotide nucleotidyltransferase (polynucleotide phosphorylase)	18	13	4.1	7.2	1.8	2.7	0	1.8	0	0	0	0	0	0	5.2	0	0	0	0	0	3.4	0.00126624	0.0039098	NULL
CLST129617 TIGR:TIGR02027,COG:COG0202,KEGG:K03040 DNA-directed RNA polymerase, alpha subunit/40 kD subunit	11.7	13	0	0	0	0.9	6.3	5.3	0	0	0	0	0	0	0	0	0	0	0	0	3.1	0.00277869	0.00665427	NULL
CLST131299 COG:COG1592 Rubrerythrin	19.1	29.5	11.3	5.1	1.8	1.8	0.9	1.8	0	0	3.3	0	0	0	0	0	0	0	0	0	3.45	0.000232962	0.00136193	NULL
CLST131789 TIGR:TIGR01930,COG:COG0183,KEGG:K00626 Acetyl-CoA acetyltransferase	74.3	114.5	18.4	19.6	30.6	40.8	18.8	17.8	5.5	12.8	0	0	0	0	0	0	0	0	0	0	25.1	9.01678e-05	0.00122073	UP
CLST133396 PFAM:PF00378.13,TIGR:TIGR03210,KEGG:K01715,COG:COG1024,TIGR:TIGR02437 Enoyl-CoA hydratase/carnithine racemase	23.4	11.8	13.3	11.3	12.6	14.5	0	0	0	0	0	0	4	3.2	0	0	23.6	16.9	0	0	12.2	0.0910463	0.0885312	NULL
CLST136019 COG:COG0088,KEGG:K02926,PFAM:PF00573.15 Ribosomal protein L4	4.2	0	6.1	0	10.8	10	5.4	0	1.8	1.8	7.7	14.5	5	4.3	1	2	2.3	0	0	0	2.9	0.638852	0.345963	NULL
CLST137050 KEGG:K00925,TIGR:TIGR00016,COG:COG0282 Acetate kinase	11.7	20.1	4.1	8.2	9.9	7.2	7.2	8	0	0	0	0	0	0	0	0	0	0	0	0	8.1	3.49879e-05	0.000690143	UP
CLST137454 PFAM:PF00378.13,KEGG:K01715,COG:COG1024 Enoyl-CoA hydratase/carnithine racemase	17	23.6	0	0	8.1	8.2	9	8.9	0.9	0	0	0	0	0	0	0	0	0	0	0	8.55	0.00178888	0.00484373	UP
CLST143564 KEGG:K02056,COG:COG1129,TIGR:TIGR01288,KEGG:K10542,PFAM:PF00005.20,TIGR:TIGR02633 ABC-type sugar transport system, ATPase component	13.8	23.6	2	6.2	5.4	4.5	2.7	2.7	0	0	0	0	0	0	0	0	0	0	0	0	4.95	3.49879e-05	0.000690143	NULL
CLST146089 KEGG:K10439 hypothetical protein	3.2	3.5	3.1	0	11.7	9.1	0	0	9.1	9.2	6.6	7.8	3	2.1	0	0	0	0	5.3	5.4	-1	0.937144	0.442191	NULL
CLST149019 TIGR:TIGR00060,COG:COG0256,KEGG:K02881 Ribosomal protein L18	11.7	8.3	4.1	5.1	7.2	8.2	0	0	4.6	3.7	8.8	5.6	11	8.5	0	2	0	0	11.6	12	1.05	0.907171	0.430356	NULL
CLST149784 KEGG:K10188,COG:COG1653 ABC-type sugar transport system, periplasmic component	13.8	17.7	15.4	11.3	10.8	5.4	0	0	1.8	0	15.4	12.3	3	4.3	0	0	0	4.2	6.3	2.2	8.45	0.137244	0.123871	NULL
CLST153584 COG:COG1629,NOG:NOG148246 Receptor	23.4	14.2	0	0	9.9	7.2	0	0	0	0	0	0	0	0	7.2	9.1	0	0	0	0	3.6	0.0866903	0.0852198	NULL
CLST154687 KEGG:K07567,TIGR:TIGR00004,COG:COG0251 Putative translation initiation inhibitor, yjgF family	0	0	2	2.1	0	3.6	0	0	0	2.7	7.7	8.9	11	10.7	0	2	2.3	2.1	2.1	0	-2.2	0.0605247	0.0664614	NULL
CLST157922 KEGG:K10108,COG:COG2182 Maltose-binding periplasmic proteins/domains	19.1	13	0	0	0	0	0	0	0	0	19.7	26.8	0	0	0	0	0	0	0	0	0	0.868518	0.414253	NULL
CLST160885 COG:COG3937 Uncharacterized conserved protein	3.2	3.5	3.1	4.1	0	0	0	0	19.2	13.7	14.3	11.2	0	0	0	0	81.1	63.3	0	0	-4.05	0.343132	0.227891	NULL
CLST163312 NOG:NOG85156 Receptor	5.3	3.5	0	0	6.3	10	3.6	5.3	0	0	0	0	0	0	0	0	0	0	22.2	17.4	4.45	0.0610507	0.0664614	NULL
CLST165028 NOG:NOG125711 Annotation not available	12.7	11.8	0	0	25.2	18.1	0	0	0	0	0	0	0	0	2.1	5.1	0	0	0	0	5.9	0.0636219	0.0678634	NULL
CLST167607 NOG:NOG86818 Annotation not available	7.4	9.4	4.1	4.1	0	0	2.7	3.6	0	0	0	0	0	0	0	0	0	0	37	30.5	3.85	0.0610507	0.0664614	NULL
CLST169990 NOG:NOG69778 Annotation not available	4.2	2.4	0	0	5.4	6.3	12.6	10.7	0	0	0	0	0	0	0	0	0	0	20.1	15.2	4.8	0.0611747	0.0664614	NULL
CLST175974 COG:COG0235,KEGG:K01628 Ribulose-5-phosphate 4-epimerase and related epimerases and aldolases	13.8	13	4.1	3.1	7.2	6.3	0	0	4.6	4.6	6.6	6.7	0	0	4.1	2	0	2.1	0	2.2	3.05	0.210583	0.168466	NULL
CLST184474 COG:COG4822,KEGG:K02190,PFAM:PF06180.4 Cobalamin biosynthesis protein CbiK, Co2+ chelatase	5.3	7.1	2	2.1	8.1	6.3	2.7	0.9	7.3	1.8	0	4.5	4	5.3	0	0	0	0	0	2.2	3.1	0.0604879	0.0664614	NULL
CLST185154 PFAM:PF03764.11,PFAM:PF00679.17,TIGR:TIGR00484,KEGG:K02355,COG:COG0480,TIGR:TIGR00490 Translation elongation factors (GTPases)	10.6	7.1	8.2	7.2	10.8	5.4	0	0	0	0	0	0	2	4.3	1	0	4.5	4.2	0	0	7.15	0.0136231	0.0214077	UP
CLST190131 hypothetical protein	0	0	2	6.2	5.4	8.2	0	0	0	0	0	0	0	0	0	0	6.8	11.6	0	0	1	0.234445	0.178625	NULL
CLST192851 TIGR:TIGR00651 pta: phosphate acetyltransferase	9.6	15.3	6.1	2.1	5.4	3.6	0	0	0	0	0	0	0	0	0	0	0	0	0	0	4.5	0.000733547	0.0027469	NULL
CLST201880 COG:COG0800,KEGG:K01625,TIGR:TIGR01182 2-keto-3-deoxy-6-phosphogluconate aldolase	11.7	16.5	18.4	18.5	4.5	3.6	2.7	0.9	0	0	0	0	0	0	0	0	0	0	0	0	8.1	3.52914e-05	0.000690143	UP
CLST204864 PFAM:PF02614.7,KEGG:K01812,COG:COG1904 Glucuronate isomerase	11.7	15.3	7.2	5.1	0	0	0	0	0	0	0	0	0	0	0	0	0	0	0	0	2.55	0.0095011	0.0167219	NULL
CLST213493 PFAM:PF03764.11,PFAM:PF00679.17,KEGG:K02355,COG:COG0480,TIGR:TIGR00490 Translation elongation factors (GTPases)	19.1	21.2	0	0	2.7	4.5	11.7	7.1	0	0	0	0	0	0	0	0	0	0	0	0	5.8	0.000733547	0.0027469	UP
CLST213949 NOG:NOG114220 Receptor	0	3.5	0	0	0	0	0	0	0	0	0	0	0	0	6.2	5.1	19.1	12.7	31.7	39.2	-2.55	0.0634788	0.0678634	NULL
CLST214154 COG:COG1592,PFAM:PF02915.10 Rubrerythrin	0	0	17.4	14.4	0	1.8	0.9	0	0.9	0.9	7.7	7.8	1	1.1	3.1	3	9	16.9	0	0	-1.6	0.36783	0.240662	NULL
CLST221215 TIGR:TIGR01176,PFAM:PF00890.17,KEGG:K00239,TIGR:TIGR01812,TIGR:TIGR01813,KEGG:K00278,COG:COG1053 Succinate dehydrogenase/fumarate reductase, flavoprotein subunit	2.1	0	12.3	13.4	14.4	11.8	5.4	3.6	0	2.7	6.6	4.5	1	1.1	0	0	5.6	3.2	3.2	3.3	5.65	0.0527676	0.061914	NULL
CLST221489 TIGR:TIGR00760,KEGG:K01786,COG:COG0235 Ribulose-5-phosphate 4-epimerase and related epimerases and aldolases	5.3	4.7	7.2	5.1	0	0	0	0	0	0	0	0	4	5.3	0	0	0	2.1	0	0	2.35	0.174266	0.151088	NULL
CLST224618 KEGG:K03522,COG:COG2025,PFAM:PF00766.12 Electron transfer flavoprotein, alpha subunit	8.5	18.9	13.3	10.3	7.2	10.9	13.4	5.3	0	0	0	0	0	0	0	0	0	0	0	0	10.6	3.52914e-05	0.000690143	UP
CLST225457 KEGG:K01041,TIGR:TIGR03458,COG:COG0427 Acetyl-CoA hydrolase	6.4	8.3	8.2	10.3	0	0	0	0	0	0	0	0	0	0	0	3	11.3	6.3	0	0	3.2	0.22166	0.174161	NULL
CLST283524 COG:COG3444,TIGR:TIGR00854,KEGG:K02745 Phosphotransferase system, mannose/fructose/N-acetylgalactosamine-specific component IIB	0	0	0	3.1	0	0	0	0	7.3	7.3	5.5	5.6	0	0	0	0	0	0	0	0	0	0.243281	0.180664	NULL
CLST297407 TIGR:TIGR02176,COG:COG1014,KEGG:K03737,COG:COG0674,COG:COG1013 Pyruvate:ferredoxin oxidoreductase and related 2-oxoacid:ferredoxin oxidoreductases, alpha subunit	0	0	20.5	14.4	9.9	5.4	8.1	8	0	0	5.5	3.3	0	0	0	0	0	0	0	0	8.05	0.00465311	0.00974937	UP
CLST302684 KEGG:K10108,COG:COG2182 Maltose-binding periplasmic proteins/domains	0	0	11.3	9.3	9	6.3	0	1.8	0	0	4.4	0	5	8.5	5.2	4.1	0	0	0	0	4.05	0.187186	0.158388	NULL
CLST310151 KEGG:K03522,COG:COG2025,PFAM:PF00766.12 Electron transfer flavoprotein, alpha subunit	0	0	28.7	33	4.5	10	0	0	0	0	0	0	0	0	8.2	7.1	7.9	6.3	0	0	2.25	0.316621	0.217677	NULL
CLST316189 hypothetical protein	7.4	13	0	0	3.6	1.8	0	0	0	0	0	0	0	0	6.2	5.1	0	0	0	0	0.9	0.140389	0.126064	NULL
CLST322553 TIGR:TIGR01117,COG:COG4799,KEGG:K01966 Acetyl-CoA carboxylase, carboxyltransferase component (subunits alpha and beta)	8.5	5.9	5.1	4.1	0	0	11.7	13.3	0	0	0	0	0	0	5.2	5.1	0	0	0	0	5.5	0.00895763	0.0164223	UP
CLST337171 hypothetical protein	0	0	36.9	35	0	0	0	0	0	0	0	0	17	10.7	0	0	9	9.5	0	0	0	1	0.45953	NULL
CLST345709 TIGR:TIGR01409,COG:COG1653,KEGG:K02027 ABC-type sugar transport system, periplasmic component	11.7	20.1	8.2	7.2	2.7	2.7	0	0	0	0	0	0	0	0	0	0	0	0	0	0	4.95	0.000728414	0.0027469	NULL
CLST382873 NOG:NOG82582 Annotation not available	7.4	7.1	2	0	0	0	0	0	0	0	0	0	13	8.5	0	0	0	0	0	0	0	0.509843	0.300363	NULL
CLST416952 hypothetical protein	0	0	26.6	23.7	0	0	0	0	0	0	0	0	0	0	7.2	7.1	86.7	73.9	0	0	0	0.739197	0.381521	NULL
CLST445198 TIGR:TIGR01771,COG:COG0039,TIGR:TIGR01763,KEGG:K00026 Malate/lactate dehydrogenases	0	0	9.2	8.2	0	0	0	0	0	0	0	0	0	0	5.2	6.1	0	0	0	0	0	0.543862	0.310809	NULL
CLST446169 hypothetical protein	0	0	8.2	13.4	0	0	7.2	8	0	0	0	0	0	0	0	0	0	0	0	0	3.6	0.0095011	0.0167219	NULL
CLST468303 COG:COG1653 ABC-type sugar transport system, periplasmic component	0	0	0	0	5.4	5.4	0	0	0	0	0	0	6	6.4	0	0	0	0	0	0	0	0.868418	0.414253	NULL
CLST472286 TIGR:TIGR03850 bind_CPR_0540: carbohydrate ABC transporter substrate-binding protein, CPR_0540 family	0	0	0	0	0	0	0	0	0	0	0	0	6	7.5	0	0	0	0	9.5	7.6	0	0.0871566	0.0852198	NULL
CLST474556 KEGG:K02058,COG:COG1879 ABC-type sugar transport system, periplasmic component	9.6	4.7	7.2	13.4	1.8	1.8	0	0	6.4	2.7	3.3	15.6	19	23.5	0	0	0	0	12.7	5.4	-1.1	0.724854	0.376325	NULL
CLST474725 KEGG:K04043,COG:COG0443,TIGR:TIGR02350 Molecular chaperone	0	1.2	9.2	7.2	8.1	8.2	0.9	0.9	0	0	7.7	6.7	0	0	0	0	0	0	0	0	4.2	0.00464876	0.00974937	NULL
CLST489843 KEGG:K00262,PFAM:PF02812.11,COG:COG0334,PFAM:PF00208.14 Glutamate dehydrogenase/leucine dehydrogenase	4.2	5.9	0	0	6.3	9.1	0	0	0	0	0	0	0	0	7.2	4.1	0	0	0	0	2.1	0.11654	0.109101	NULL
CLST518100 hypothetical protein	0	0	11.3	8.2	0	0	0	0	0	0	0	0	0	0	0	0	7.9	7.4	0	0	0	0.543862	0.310809	NULL
CLST524229 KEGG:K00088,TIGR:TIGR01302,COG:COG0516 IMP dehydrogenase/GMP reductase	0	0	10.2	8.2	0.9	1.8	5.4	7.1	0	0	12.1	13.4	0	0	0	0	0	0	0	0	3.6	0.0611747	0.0664614	NULL
CLST524470 KEGG:K03046,TIGR:TIGR02388,TIGR:TIGR02390,COG:COG0086,TIGR:TIGR02387,TIGR:TIGR02386 DNA-directed RNA polymerase, beta subunit/160 kD subunit	0	0	6.1	13.4	0	0	1.8	0	0	0	7.7	8.9	0	0	0	0	0	0	0	0	0	0.388756	0.25037	NULL
CLST537862 KEGG:K00262,COG:COG0334,PFAM:PF00208.14 Glutamate dehydrogenase/leucine dehydrogenase	19.1	9.4	26.6	23.7	0.9	2.7	0	0	0	0	0	1.1	0	0	1	1	0	0	0	0	6.05	0.0126863	0.0202981	UP
CLST550349 hypothetical protein	0	0	0	0	0	0	12.6	16	0	0	0	0	41	45.9	0	0	0	0	0	0	0	0.868518	0.414253	NULL
CLST562913 KEGG:K01269,COG:COG1362 Aspartyl aminopeptidase	0	0	11.3	10.3	0	0	0	0	0	0	7.7	3.3	0	5.3	0	0	3.4	3.2	0	0	0	0.820953	0.402473	NULL
CLST571673 hypothetical protein	40.3	47.2	38.9	37.1	8.1	8.2	0.9	0	6.4	10.1	3.3	1.1	0	0	14.4	10.1	0	0	45.5	34.8	17.8	0.199431	0.164594	NULL
CLST599658 hypothetical protein	0	0	0	0	0	0	0	0	0	0	0	0	7	5.3	2.1	0	0	2.1	5.3	5.4	-1.05	0.0252305	0.0351971	NULL
CLST609168 NOG:NOG114702,TIGR:TIGR03544 Cell division protein	11.7	11.8	3.1	0	0	0	0	0	0	0	7.7	6.7	0	0	0	0	0	0	0	0	0	0.287025	0.202877	NULL
CLST613121 hypothetical protein	22.3	23.6	8.2	6.2	0	0	0	0	0	0	0	0	0	0	0	0	0	0	0	0	3.1	0.0095011	0.0167219	NULL
CLST614471 COG:COG0459,KEGG:K04077,TIGR:TIGR02348 Chaperonin GroEL (HSP60 family)	14.9	11.8	3.1	3.1	0	0	9	8.9	0	0	0	0	0	0	0	0	0	0	0	0	6	0.000728414	0.0027469	UP
CLST645054 NOG:NOG75757 Receptor	12.7	10.6	2	1	0	0	0	0	0	0	0	0	10	12.8	0	0	0	0	0	0	0.5	0.199105	0.164594	NULL
CLST685173 hypothetical protein	0	0	0	0	41.4	35.3	15.2	16.9	0	0	0	0	0	0	0	0	0	0	0	0	7.6	0.0095011	0.0167219	UP

## Sheet: Healthy_vs_ICD_HumanOnly
Protein	6a_2	6a_3	6b_1	6b_2	16b_2	16b_3	18b_1	18b_2	10a_1	10a_3	10b_1	10b_2	15a_1	15a_2	15b_1	15b_2	16a_1	16a_2	18a_1	18a_2	Difference	Pvalue	Qvalue	Change
HR:gi_10280622_ref_NP_066188.1	166.7	148.7	56.4	57.7	9	7.2	32.3	35.6	81.2	100.8	4.4	5.6	62	71.6	178.3	172.5	23.6	21.1	94.1	90.3	-30.4	0.562834	0.53132	NULL
HR:gi_10334859_ref_NP_066270.1	0	2.4	10.2	10.3	5.4	4.5	1.8	1.8	10	9.2	0	0	11	11.7	14.4	15.2	11.3	14.8	29.6	27.2	-8.05	0.027597	0.106781	NULL
HR:gi_10337585_ref_NP_066290.1	2.1	0	2	2.1	0	0	0	1.8	11	11.9	6.6	4.5	2	6.4	11.3	23.3	4.5	4.2	7.4	8.7	-6.1	0.000484979	0.0219912	DOWN
HR:gi_106507261_ref_NP_005387.2	0	0	0	0	0	0	0	0	0	0	0	0	2	0	0	0	12.4	14.8	7.4	9.8	0	0.048014	0.135866	NULL
HR:gi_10835000_ref_NP_000927.1	14.9	16.5	26.6	44.3	8.1	4.5	12.6	9.8	20.1	18.3	23	37.9	22	29.9	16.5	16.2	125	155.2	114.2	142.5	-12.7	0.0135195	0.104626	NULL
HR:gi_10835220_ref_NP_004311.1	20.2	18.9	17.4	16.5	12.6	15.4	7.2	6.2	5.5	3.7	23	30.1	12	6.4	21.6	14.2	23.6	24.3	14.8	12	1.45	0.846997	0.634107	NULL
HR:gi_10835248_ref_NP_006498.1	0	0	0	0	0	0	0	0	2.7	4.6	0	0	9	8.5	0	0	0	0	9.5	6.5	-1.35	0.0253979	0.106781	NULL
HR:gi_11024714_ref_NP_061828.1	10.6	7.1	9.2	0	0	0	5.4	10.7	8.2	5.5	0	6.7	0	0	9.3	9.1	13.5	12.7	0	0	0.15	1	0.67	NULL
HR:gi_110349713_ref_NP_597676.2	2.1	2.4	28.7	28.8	1.8	6.3	3.6	3.6	19.2	17.4	0	0	16	12.8	12.4	17.3	10.1	7.4	13.7	10.9	-9	0.374588	0.418751	NULL
HR:gi_110349715_ref_NP_003310.3	2.1	2.4	28.7	28.8	1.8	6.3	3.6	3.6	19.2	17.4	0	0	16	12.8	12.4	17.3	10.1	7.4	13.7	10.9	-9	0.374588	0.418751	NULL
HR:gi_110349717_ref_NP_597681.2	2.1	2.4	28.7	28.8	1.8	6.3	3.6	3.6	19.2	17.4	0	0	16	12.8	12.4	17.3	10.1	7.4	13.7	10.9	-9	0.374588	0.418751	NULL
HR:gi_110349719_ref_NP_596869.3	2.1	3.5	28.7	30.9	3.6	6.3	6.3	6.2	19.2	17.4	0	0	17	15	14.4	20.3	12.4	7.4	18	12	-8.45	0.374588	0.418751	NULL
HR:gi_110349772_ref_NP_000079.2	0	10.6	7.2	9.3	9.9	11.8	7.2	8	2.7	8.2	3.3	0	0	0	0	0	2.3	3.2	2.1	4.4	6.45	0.00618868	0.0691069	NULL
HR:gi_110611231_ref_NP_001276.2	20.2	21.2	8.2	4.1	0	2.7	14.3	16.9	26.5	31.2	9.9	7.8	34	38.4	37.1	31.5	9	10.6	78.3	89.2	-20.1	0.0186163	0.104626	NULL
HR:gi_110611903_ref_NP_060003.2	3.2	5.9	23.6	27.8	8.1	14.5	18.8	24.9	31	29.3	12.1	6.7	17	17.1	64.9	63.9	15.8	14.8	13.7	18.5	-0.4	0.374947	0.418751	NULL
HR:gi_110624781_ref_NP_003793.2	7.4	11.8	19.5	24.7	10.8	15.4	13.4	18.7	17.3	16.5	8.8	8.9	8	12.8	41.2	35.5	16.9	11.6	8.5	9.8	2.2	0.616029	0.53132	NULL
HR:gi_113416274_ref_XP_001128558.1	0	0	0	0	0	0	6.3	5.3	3.7	3.7	0	0	0	0	5.2	7.1	0	2.1	0	0	0	0.683577	0.561959	NULL
HR:gi_113419293_ref_XP_941326.2	11.7	7.1	0	3.1	9.9	11.8	0	0	3.7	5.5	0	0	0	0	3.1	4.1	0	0	0	4.4	5.1	0.148958	0.241975	NULL
HR:gi_113422046_ref_XP_001125770.1	9.6	8.3	9.2	8.2	22.5	22.6	15.2	15.1	9.1	9.2	12.1	19	10	13.9	12.4	16.2	6.8	12.7	20.1	18.5	-0.2	1	0.67	NULL
HR:gi_113423966_ref_XP_001132949.1	19.1	7.1	9.2	0	0	0	5.4	10.7	8.2	5.5	0	6.7	0	0	9.3	9.1	13.5	12.7	0	0	0.15	0.873338	0.638921	NULL
HR:gi_113428622_ref_XP_001131379.1	58.4	69.6	35.9	36	0	0	54.7	47.2	5.5	2.7	54.8	27.9	17	39.5	88.6	95.4	19.1	21.1	60.3	76.1	7.9	0.728356	0.577591	NULL
HR:gi_113430875_ref_XP_945848.2	5.3	0	14.3	22.7	18	15.4	13.4	7.1	25.6	22	35.1	30.1	13	11.7	0	5.1	5.6	0	18	45.7	-1.65	0.588453	0.53132	NULL
HR:gi_113431113_ref_XP_001127749.1	104	62.6	22.5	22.7	3.6	0	10.8	8.9	17.3	23.8	2.2	4.5	17	24.6	82.5	100.5	3.4	3.2	36	33.7	-3.9	0.847054	0.634107	NULL
HR:gi_113431326_ref_XP_947220.2	7.4	10.6	7.2	6.2	0	0	6.3	5.3	0	0	5.5	6.7	2	3.2	10.3	5.1	0	5.3	6.3	5.4	1.05	0.293594	0.378428	NULL
HR:gi_11415030_ref_NP_068803.1	3.2	7.1	16.4	11.3	9.9	8.2	8.1	11.6	15.5	13.7	4.4	10	16	12.8	19.6	21.3	20.3	13.7	11.6	3.3	-4.65	0.0638775	0.135866	NULL
HR:gi_114155140_ref_NP_689476.2	0	0	6.1	5.1	0	0	0	0	6.4	5.5	0	0	3	2.1	6.2	10.1	15.8	9.5	0	0	-4.25	0.0636287	0.135866	NULL
HR:gi_114155144_ref_NP_001036816.1	0	0	6.1	5.1	0	0	0	0	4.6	4.6	0	0	0	2.1	6.2	9.1	13.5	8.4	0	0	-3.35	0.163292	0.251507	NULL
HR:gi_114155146_ref_NP_001036817.1	0	0	6.1	5.1	0	0	0	0	4.6	2.7	0	0	0	2.1	5.2	9.1	13.5	8.4	0	0	-2.4	0.190533	0.27161	NULL
HR:gi_114155148_ref_NP_001036818.1	0	0	6.1	5.1	0	0	0	0	4.6	4.6	0	0	0	2.1	6.2	9.1	13.5	8.4	0	0	-3.35	0.163292	0.251507	NULL
HR:gi_115496169_ref_NP_000248.2	8.5	14.2	36.9	43.2	9	12.7	28.7	36.5	36.5	29.3	6.6	11.2	17	22.4	40.2	51.8	19.1	16.9	6.3	10.9	3.4	0.877325	0.638921	NULL
HR:gi_115527082_ref_NP_005954.3	8.5	11.8	44.1	41.2	10.8	17.2	32.3	36.5	52.9	53.2	20.8	16.7	24	34.2	97.9	82.2	18	14.8	19	19.6	2.35	0.263268	0.349287	NULL
HR:gi_116256327_ref_NP_009218.2	0	0	4.1	0	13.5	7.2	9.9	16	7.3	11	0	0	3	7.5	3.1	7.1	0	2.1	0	2.2	3.05	0.453932	0.470619	NULL
HR:gi_116256329_ref_NP_000893.2	0	0	4.1	0	13.5	7.2	9.9	16	7.3	11	0	0	3	7.5	3.1	7.1	0	2.1	0	2.2	3.05	0.453932	0.470619	NULL
HR:gi_116256331_ref_NP_009219.2	0	0	4.1	0	13.5	7.2	9.9	16	7.3	11	0	0	3	7.5	3.1	7.1	0	2.1	0	2.2	3.05	0.453932	0.470619	NULL
HR:gi_116256333_ref_NP_009220.2	0	0	4.1	0	13.5	7.2	9.9	16	7.3	11	0	0	3	7.5	3.1	7.1	0	2.1	0	2.2	3.05	0.453932	0.470619	NULL
HR:gi_116284392_ref_NP_002448.2	3.2	0	0	2.1	2.7	2.7	0	1.8	5.5	7.3	0	0	5	8.5	4.1	8.1	9	10.6	8.5	14.1	-5.75	0.00727419	0.0749801	NULL
HR:gi_116284412_ref_NP_009111.2	5.3	8.3	3.1	3.1	0	0	0	0	4.6	7.3	4.4	10	0	0	0	4.1	0	0	0	0	1.55	0.966303	0.67	NULL
HR:gi_118442845_ref_NP_001072984.1	3.2	0	0	0	7.2	4.5	4.5	3.6	2.7	0	5.5	11.2	3	3.2	5.2	4.1	0	0	0	2.2	0.55	0.874629	0.638921	NULL
HR:gi_118498341_ref_NP_001897.4	40.3	47.2	12.3	17.5	0	0	28.7	24.9	46.6	47.7	21.9	26.8	156.9	214.7	32	30.4	12.4	10.6	133.3	122.9	-18.1	0.0586341	0.135866	NULL
HR:gi_118498350_ref_NP_001020371.3	48.8	48.4	17.4	23.7	1.8	0	35	32.9	59.3	65.1	27.4	26.8	255.8	338.5	48.4	50.7	14.6	14.8	294	312.2	-26.7	0.0447818	0.135866	NULL
HR:gi_119220569_ref_NP_001007241.2	0	0	0	0	19.8	23.5	6.3	3.6	5.5	4.6	0	0	3	0	3.1	3	0	0	12.7	23.9	-1.2	0.90339	0.646999	NULL
HR:gi_119220571_ref_NP_001493.2	0	0	0	0	19.8	23.5	6.3	3.6	5.5	4.6	0	0	3	0	3.1	3	0	0	13.7	23.9	-1.2	0.90339	0.646999	NULL
HR:gi_119220572_ref_NP_001007242.2	0	0	0	0	19.8	23.5	6.3	3.6	2.7	3.7	0	0	3	0	3.1	3	0	0	7.4	16.3	-1.05	0.715752	0.57715	NULL
HR:gi_119220573_ref_NP_001007243.2	0	0	0	0	19.8	23.5	6.3	3.6	2.7	3.7	0	0	3	0	3.1	3	0	0	7.4	16.3	-1.05	0.715752	0.57715	NULL
HR:gi_119395750_ref_NP_006112.3	35	33	21.5	14.4	5.4	2.7	6.3	8.9	27.4	22.9	25.2	17.9	15	33.1	21.6	22.3	90.1	73.9	33.8	33.7	-14.65	0.0278905	0.106781	NULL
HR:gi_124248516_ref_NP_001035965.1	11.7	35.4	15.4	12.4	15.3	8.2	13.4	8.9	39.3	33.9	13.2	13.4	24	26.7	9.3	16.2	0	7.4	24.3	25	-7.2	0.354358	0.416527	NULL
HR:gi_13489087_ref_NP_109591.1	3.2	2.4	3.1	2.1	4.5	0	0	0	1.8	4.6	2.2	6.7	14	15	4.1	9.1	4.5	6.3	0	0	-2.3	0.0619807	0.135866	NULL
HR:gi_14110399_ref_NP_112603.1	0	2.4	0	0	0	3.6	2.7	1.8	12.8	10.1	0	0	8	7.5	4.1	5.1	2.3	2.1	8.5	20.7	-5.4	0.0210813	0.104626	NULL
HR:gi_148536848_ref_NP_001798.2	6.4	8.3	3.1	0	0	0	9.9	13.3	27.4	31.2	24.1	16.7	15	22.4	5.2	5.1	3.4	3.2	33.8	25	-14.8	0.0149354	0.104626	NULL
HR:gi_148539840_ref_NP_004397.2	20.2	28.3	85	109.2	41.4	36.2	30.5	16.9	54.8	52.2	84.4	113.8	56	60.9	13.4	12.2	21.4	26.4	50.8	94.6	-20.15	0.616029	0.53132	NULL
HR:gi_148539842_ref_NP_015568.2	20.2	28.3	85	109.2	113.4	112.3	67.2	43.6	146.1	151.2	219.3	325.8	156.9	60.9	13.4	31.5	21.4	26.4	50.8	215.4	-27.4	0.463594	0.470619	NULL
HR:gi_148539844_ref_NP_060049.2	20.2	28.3	85	109.2	113.4	112.3	67.2	43.6	146.1	151.2	219.3	325.8	156.9	60.9	13.4	31.5	21.4	26.4	50.8	215.4	-27.4	0.463594	0.470619	NULL
HR:gi_15559207_ref_NP_254275.1	59.4	44.8	176.2	204.9	8.1	5.4	15.2	14.2	16.4	15.6	5.5	4.5	59	65.1	30.9	57.9	69.8	53.8	214.7	349.2	-25.85	0.562834	0.53132	NULL
HR:gi_16554592_ref_NP_443739.1	0	0	17.4	17.5	5.4	18.1	2.7	2.7	2.7	4.6	0	0	13	13.9	17.5	20.3	12.4	16.9	0	6.5	-5.4	0.937918	0.661479	NULL
HR:gi_16933559_ref_NP_060145.2	28.7	30.7	28.7	22.7	3.6	3.6	0	1.8	0	0	0	0	0	0	0	0	0	0	0	0	13.15	0.000169368	0.0219912	UP
HR:gi_17986273_ref_NP_524144.1	3.2	0	5.1	4.1	0	0	4.5	3.6	3.7	7.3	3.3	0	7	7.5	5.2	11.2	4.5	3.2	0	2.2	-0.7	0.19926	0.281061	NULL
HR:gi_18254480_ref_NP_543154.1	13.8	17.7	13.3	12.4	11.7	13.6	26	21.4	7.3	11	15.4	19	30	24.6	11.3	10.1	14.6	14.8	50.8	47.9	-1.4	0.787137	0.60969	NULL
HR:gi_19923195_ref_NP_001703.2	11.7	8.3	4.1	6.2	8.1	9.1	5.4	4.4	9.1	11.9	5.5	5.6	12	15	3.1	5.1	10.1	13.7	5.3	6.5	-0.65	0.395888	0.431293	NULL
HR:gi_21361122_ref_NP_001440.2	0	0	9.2	7.2	0	0	10.8	13.3	0	1.8	0	0	10	16	4.1	0	0	0	0	0	3.6	0.408087	0.440997	NULL
HR:gi_21361370_ref_NP_002853.2	0	2.4	2	2.1	6.3	5.4	0	0	0	0	0	2.2	0	0	4.1	3	7.9	8.4	0	0	2.05	0.741598	0.581136	NULL
HR:gi_21489959_ref_NP_653247.1	6.4	18.9	4.1	6.2	2.7	3.6	11.7	14.2	21.9	22	3.3	0	14	10.7	17.5	22.3	9	9.5	12.7	20.7	-7.05	0.153492	0.241975	NULL
HR:gi_21536288_ref_NP_001815.2	4.2	8.3	13.3	11.3	10.8	10	5.4	5.3	3.7	5.5	4.4	0	2	6.4	8.2	4.1	15.8	10.6	0	2.2	4.9	0.0586341	0.135866	NULL
HR:gi_21536452_ref_NP_002762.2	10.6	8.3	3.1	4.1	0	0	3.6	2.7	4.6	6.4	11	17.9	10	7.5	12.4	10.1	10.1	6.3	6.3	9.8	-6.55	0.00966749	0.0925317	NULL
HR:gi_21614544_ref_NP_002955.2	3.2	10.6	13.3	14.4	5.4	3.6	2.7	3.6	45.6	66	11	16.7	44	95	9.3	12.2	5.6	3.2	49.7	64.2	-25.85	0.0166884	0.104626	NULL
HR:gi_22748737_ref_NP_689551.1	19.1	26	25.6	22.7	47.7	48	14.3	17.8	21	21.1	32.9	40.2	44	47	33	27.4	47.3	46.4	43.4	39.2	-15.55	0.176966	0.260588	NULL
HR:gi_24119203_ref_NP_705935.1	0	0	6.1	5.1	0	0	0	0	4.6	2.7	0	0	0	2.1	5.2	9.1	13.5	8.4	0	0	-2.4	0.190533	0.27161	NULL
HR:gi_24638454_ref_NP_733765.1	20.2	18.9	16.4	15.4	10.8	14.5	7.2	7.1	0	2.7	21.9	27.9	11	7.5	22.7	13.2	23.6	23.2	14.8	12	0.95	0.616029	0.53132	NULL
HR:gi_27597085_ref_NP_000357.3	13.8	7.1	14.3	5.1	11.7	20.8	3.6	4.4	8.2	5.5	0	2.2	0	6.4	5.2	11.2	16.9	11.6	2.1	3.3	4.05	0.132318	0.227566	NULL
HR:gi_27764861_ref_NP_002462.1	7.4	11.8	29.7	36	9	11.8	27.8	31.1	33.8	29.3	5.5	10	14	20.3	44.3	46.7	19.1	14.8	5.3	10.9	2.85	1	0.67	NULL
HR:gi_27764863_ref_NP_001627.1	5.3	2.4	9.2	10.3	7.2	18.1	2.7	2.7	1.8	2.7	13.2	4.5	5	7.5	6.2	11.2	46.2	50.7	5.3	7.6	-0.6	0.588453	0.53132	NULL
HR:gi_27886529_ref_NP_775293.1	20.2	18.9	17.4	16.5	12.6	15.4	7.2	6.2	5.5	3.7	23	30.1	12	6.4	21.6	14.2	23.6	24.3	14.8	12	1.45	0.846997	0.634107	NULL
HR:gi_28173560_ref_NP_778224.1	3.2	7.1	16.4	11.3	9.9	8.2	8.1	11.6	15.5	13.7	4.4	10	16	12.8	19.6	21.3	20.3	13.7	11.6	3.3	-4.65	0.0638775	0.135866	NULL
HR:gi_28372499_ref_NP_037424.2	5.3	0	4.1	0	6.3	0	1.8	1.8	0	0	0	3.3	2	0	0	0	13.5	15.8	0	0	1.8	0.422174	0.452571	NULL
HR:gi_29725633_ref_NP_002900.2	0	0	0	0	0	0	2.7	0	6.4	6.4	0	0	50	23.5	6.2	7.1	0	0	26.4	48.9	-6.4	0.0126863	0.104626	NULL
HR:gi_30520377_ref_NP_071317.2	14.9	26	4.1	5.1	1.8	0	10.8	12.5	11	10.1	0	0	20	17.1	10.3	12.2	2.3	4.2	7.4	7.6	-0.9	0.90773	0.646999	NULL
HR:gi_31377806_ref_NP_002635.2	41.4	55.5	23.6	23.7	8.1	8.2	30.5	31.1	58.4	76.1	7.7	4.5	81.9	99.3	59.8	58.9	82.2	58.1	149.1	198	-40.85	0.0150873	0.104626	NULL
HR:gi_31542986_ref_NP_060095.2	19.1	22.4	17.4	12.4	22.5	17.2	9.9	8	14.6	13.7	14.3	11.2	31	28.8	15.5	15.2	22.5	19	45.5	46.8	0.05	0.315692	0.395353	NULL
HR:gi_32189394_ref_NP_001677.2	0	0	16.4	17.5	4.5	7.2	14.3	7.1	0	0	6.6	8.9	6	0	10.3	7.1	21.4	17.9	0	0	0.85	0.580934	0.53132	NULL
HR:gi_34147630_ref_NP_003312.3	0	0	4.1	0	12.6	13.6	9	0	0	0	6.6	5.6	0	0	4.1	0	0	0	0	0	2.05	0.174266	0.260588	NULL
HR:gi_38455402_ref_NP_005555.2	10.6	8.3	11.3	7.2	0	0	0	0	2.7	6.4	5.5	5.6	8	8.5	9.3	9.1	0	0	5.3	6.5	-2.4	0.845026	0.634107	NULL
HR:gi_38504669_ref_NP_942130.1	0	0	3.1	0	0	0	0	0	0	1.8	2.2	3.3	10	10.7	3.1	7.1	4.5	6.3	0	2.2	-3.2	0.00460577	0.0691069	NULL
HR:gi_38504673_ref_NP_002631.3	0	0	3.1	0	0	0	0	0	0	1.8	2.2	3.3	10	10.7	3.1	7.1	4.5	6.3	0	2.2	-3.2	0.00460577	0.0691069	NULL
HR:gi_40254482_ref_NP_004029.2	161.3	144	59.4	56.6	9	8.2	36.8	36.5	73	90.7	5.5	6.7	59	65.1	164.9	164.4	21.4	19	92	84.8	-22.35	0.616029	0.53132	NULL
HR:gi_40255013_ref_NP_002474.3	6.4	4.7	3.1	4.1	0	0	0	0	1.8	2.7	4.4	8.9	8	3.2	3.1	4.1	5.6	3.2	3.2	4.4	-2.1	0.129984	0.227566	NULL
HR:gi_40354192_ref_NP_000412.2	12.7	18.9	18.4	13.4	9.9	9.1	17	20.5	16.4	7.3	17.5	13.4	21	13.9	15.5	10.1	107	101.3	20.1	25	-1.75	0.315692	0.395353	NULL
HR:gi_41152086_ref_NP_004559.4	9.6	2.4	7.2	6.2	0	0	0	0	0	0	8.8	0	6	7.5	4.1	7.1	0	0	7.4	12	-3.85	0.599051	0.53132	NULL
HR:gi_42476190_ref_NP_060004.2	15.9	16.5	34.8	38.1	11.7	15.4	31.4	38.3	48.4	49.5	18.6	16.7	25	33.1	94.8	87.3	13.5	14.8	19	15.2	1.95	0.562834	0.53132	NULL
HR:gi_42476296_ref_NP_003280.2	0	0	12.3	13.4	0	0	2.7	1.8	11	11.9	3.3	2.2	6	3.2	4.1	4.1	6.8	4.2	3.2	4.4	-3.25	0.0811944	0.155225	NULL
HR:gi_4501881_ref_NP_001091.1	7.4	7.1	5.1	7.2	11.7	10	15.2	14.2	6.4	8.2	6.6	4.5	7	8.5	18.6	8.1	6.8	10.6	4.2	2.2	1.8	0.153492	0.241975	NULL
HR:gi_4501883_ref_NP_001604.1	7.4	7.1	5.1	7.2	11.7	10	15.2	14.2	6.4	8.2	6.6	4.5	7	8.5	18.6	8.1	7.9	11.6	4.2	2.2	1.25	0.231755	0.313688	NULL
HR:gi_4501885_ref_NP_001092.1	3.2	4.7	4.1	4.1	6.3	6.3	9	7.1	2.7	4.6	3.3	4.5	2	6.4	11.3	4.1	5.6	7.4	0	0	1.2	0.296529	0.378428	NULL
HR:gi_4501887_ref_NP_001605.1	3.2	4.7	4.1	4.1	6.3	6.3	9	7.1	2.7	4.6	3.3	4.5	2	6.4	11.3	4.1	5.6	7.4	0	0	1.2	0.296529	0.378428	NULL
HR:gi_4501889_ref_NP_001606.1	7.4	7.1	5.1	7.2	11.7	10	15.2	14.2	6.4	8.2	6.6	4.5	7	8.5	18.6	8.1	7.9	11.6	4.2	2.2	1.25	0.231755	0.313688	NULL
HR:gi_4501893_ref_NP_001094.1	0	0	11.3	5.1	0	0	0	0	0	0	0	0	11	0	13.4	17.3	9	0	0	0	0	0.600867	0.53132	NULL
HR:gi_4502061_ref_NP_001622.1	13.8	16.5	12.3	11.3	12.6	19	13.4	9.8	52.9	61.4	9.9	19	73	84.4	60.8	37.6	14.6	16.9	58.2	60.9	-42.55	0.0042944	0.0691069	NULL
HR:gi_4502085_ref_NP_000690.1	165.6	158.2	53.3	49.4	10.8	10.9	42.1	44.5	56.6	75.2	2.2	5.6	83.9	80.1	193.8	181.7	19.1	17.9	108.9	108.8	-30.7	0.562834	0.53132	NULL
HR:gi_4502095_ref_NP_001141.1	0	0	0	0	1.8	0	0	3.6	9.1	11	0	0	4	4.3	25.8	24.4	7.9	3.2	0	0	-4.15	0.0289248	0.107664	NULL
HR:gi_4502099_ref_NP_001143.1	5.3	0	9.2	10.3	7.2	18.1	2.7	2.7	1.8	2.7	11	2.2	0	7.5	5.2	11.2	47.3	50.7	5.3	6.5	0.35	0.907661	0.646999	NULL
HR:gi_4502133_ref_NP_001630.1	0	0	0	0	0	0	0	0	2.7	0	3.3	0	12	13.9	0	0	0	0	7.4	10.9	-1.35	0.0253979	0.106781	NULL
HR:gi_4502163_ref_NP_001638.1	0	0	0	0	1.8	0	0	2.7	2.7	2.7	0	0	18	8.5	5.2	2	0	0	7.4	5.4	-2.7	0.0352309	0.118024	NULL
HR:gi_4502261_ref_NP_000479.1	3.2	3.5	3.1	2.1	0	0	0	0	0	0	6.6	8.9	17	28.8	15.5	13.2	0	6.3	7.4	7.6	-6.45	0.0200475	0.104626	NULL
HR:gi_4502285_ref_NP_001672.1	20.2	18.9	17.4	15.4	10.8	14.5	7.2	7.1	0	2.7	21.9	27.9	11	7.5	22.7	13.2	23.6	23.2	14.8	12	0.95	0.616029	0.53132	NULL
HR:gi_4502855_ref_NP_001816.1	0	0	12.3	21.6	5.4	7.2	1.8	1.8	4.6	3.7	0	0	3	3.2	14.4	15.2	11.3	12.7	5.3	6.5	-1.35	0.670035	0.558643	NULL
HR:gi_4502895_ref_NP_001823.1	0	0	0	0	0	2.7	0	3.6	4.6	1.8	0	0	0	12.8	0	0	16.9	21.1	15.9	26.1	-3.2	0.0834045	0.155225	NULL
HR:gi_4502997_ref_NP_001859.1	20.2	31.9	17.4	19.6	0	0	9	10.7	6.4	8.2	23	12.3	65	90.8	34	28.4	82.2	66.5	62.4	81.6	-34.15	0.0227963	0.105571	NULL
HR:gi_4502999_ref_NP_001860.1	10.6	13	8.2	9.3	0	0	1.8	2.7	1.8	0	15.4	8.9	7	16	3.1	6.1	15.8	15.8	8.5	13.1	-3.25	0.188662	0.27161	NULL
HR:gi_4503149_ref_NP_001902.1	3.2	0	0	4.1	0	0	0	0	24.6	24.7	0	0	18	12.8	0	7.1	0	3.2	6.3	4.4	-5.35	0.0320158	0.115949	NULL
HR:gi_4503471_ref_NP_001393.1	0	2.4	0	0	2.7	2.7	7.2	6.2	2.7	1.8	3.3	0	0	0	6.2	6.1	4.5	2.1	0	0	0.6	0.719284	0.57715	NULL
HR:gi_4503475_ref_NP_001949.1	0	2.4	0	0	2.7	2.7	5.4	5.3	0	0	3.3	0	0	0	6.2	7.1	0	2.1	0	0	2.55	0.375001	0.418751	NULL
HR:gi_4503549_ref_NP_001963.1	0	0	0	4.1	2.7	3.6	3.6	6.2	19.2	21.1	2.2	0	14	17.1	2.1	2	0	0	5.3	12	-0.6	0.347931	0.416527	NULL
HR:gi_4503571_ref_NP_001419.1	0	0	15.4	15.4	7.2	12.7	1.8	1.8	0	2.7	0	0	13	13.9	19.6	21.3	14.6	19	0	5.4	-4.7	0.666932	0.558643	NULL
HR:gi_4503573_ref_NP_001967.1	0	0	17.4	17.5	5.4	18.1	2.7	2.7	2.7	4.6	0	0	13	13.9	17.5	20.3	12.4	16.9	0	6.5	-5.4	0.937918	0.661479	NULL
HR:gi_4503595_ref_NP_000493.1	15.9	17.7	17.4	23.7	22.5	22.6	24.2	24	34.7	40.3	27.4	30.1	27	47	13.4	14.2	0	0	48.7	35.9	-6.2	0.231579	0.313688	NULL
HR:gi_4503681_ref_NP_003881.1	135.9	160.5	35.9	36	0	0	139.9	113.9	16.4	2.7	133.8	27.9	17	39.5	168	200	19.1	21.1	60.3	76.1	41.25	0.846997	0.634107	NULL
HR:gi_4504279_ref_NP_002098.1	0	0	0	0	0	0	6.3	5.3	3.7	5.5	0	0	0	0	5.2	7.1	0	2.1	0	0	0	0.618552	0.53132	NULL
HR:gi_4504301_ref_NP_003529.1	3.2	7.1	16.4	11.3	9.9	8.2	8.1	11.6	15.5	13.7	4.4	10	16	12.8	19.6	21.3	20.3	13.7	11.6	3.3	-4.65	0.0638775	0.135866	NULL
HR:gi_4504303_ref_NP_003530.1	3.2	7.1	16.4	11.3	9.9	8.2	8.1	11.6	15.5	13.7	4.4	10	16	12.8	19.6	21.3	20.3	13.7	11.6	3.3	-4.65	0.0638775	0.135866	NULL
HR:gi_4504305_ref_NP_003531.1	3.2	7.1	16.4	11.3	9.9	8.2	8.1	11.6	15.5	13.7	4.4	10	16	12.8	19.6	21.3	20.3	13.7	11.6	3.3	-4.65	0.0638775	0.135866	NULL
HR:gi_4504307_ref_NP_003532.1	3.2	7.1	16.4	11.3	9.9	8.2	8.1	11.6	15.5	13.7	4.4	10	16	12.8	19.6	21.3	20.3	13.7	11.6	3.3	-4.65	0.0638775	0.135866	NULL
HR:gi_4504309_ref_NP_003533.1	3.2	7.1	16.4	11.3	9.9	8.2	8.1	11.6	15.5	13.7	4.4	10	16	12.8	19.6	21.3	20.3	13.7	11.6	3.3	-4.65	0.0638775	0.135866	NULL
HR:gi_4504311_ref_NP_003534.1	3.2	7.1	16.4	11.3	9.9	8.2	8.1	11.6	15.5	13.7	4.4	10	16	12.8	19.6	21.3	20.3	13.7	11.6	3.3	-4.65	0.0638775	0.135866	NULL
HR:gi_4504313_ref_NP_003535.1	3.2	7.1	16.4	11.3	9.9	8.2	8.1	11.6	15.5	13.7	4.4	10	16	12.8	19.6	21.3	20.3	13.7	11.6	3.3	-4.65	0.0638775	0.135866	NULL
HR:gi_4504315_ref_NP_003536.1	3.2	7.1	16.4	11.3	9.9	8.2	8.1	11.6	15.5	13.7	4.4	10	16	12.8	19.6	21.3	20.3	13.7	11.6	3.3	-4.65	0.0638775	0.135866	NULL
HR:gi_4504317_ref_NP_003537.1	3.2	7.1	16.4	11.3	9.9	8.2	8.1	11.6	15.5	13.7	4.4	10	16	12.8	19.6	21.3	20.3	13.7	11.6	3.3	-4.65	0.0638775	0.135866	NULL
HR:gi_4504321_ref_NP_003486.1	3.2	7.1	16.4	11.3	9.9	8.2	8.1	11.6	15.5	13.7	4.4	10	16	12.8	19.6	21.3	20.3	13.7	11.6	3.3	-4.65	0.0638775	0.135866	NULL
HR:gi_4504323_ref_NP_003539.1	3.2	7.1	16.4	11.3	9.9	8.2	8.1	11.6	15.5	13.7	4.4	10	16	12.8	19.6	21.3	20.3	13.7	11.6	3.3	-4.65	0.0638775	0.135866	NULL
HR:gi_4505301_ref_NP_002463.1	4.2	9.4	29.7	37.1	10.8	16.3	25.1	26.7	32.9	35.7	13.2	16.7	19	24.6	83.5	66	16.9	15.8	12.7	14.1	2.75	0.463594	0.470619	NULL
HR:gi_4505847_ref_NP_000919.1	0	9.4	3.1	15.4	0	0	9	8	7.3	3.7	2.2	0	9	9.6	10.3	21.3	0	13.7	0	10.9	-2.6	0.506147	0.504275	NULL
HR:gi_4506145_ref_NP_002760.1	20.2	34.2	12.3	9.3	6.3	4.5	9	8.9	21	20.2	92.1	145	44	27.8	64.9	35.5	6.8	4.2	40.2	34.8	-26	0.0205899	0.104626	NULL
HR:gi_4506147_ref_NP_002761.1	17	31.9	18.4	9.3	6.3	4.5	11.7	9.8	19.2	18.3	63.6	111.6	39	16	44.3	30.4	13.5	8.4	25.4	25	-14.45	0.0228475	0.105571	NULL
HR:gi_4506713_ref_NP_002945.1	10.6	7.1	9.2	0	0	0	5.4	10.7	8.2	5.5	0	6.7	0	0	9.3	9.1	13.5	12.7	0	0	0.15	1	0.67	NULL
HR:gi_4506773_ref_NP_002956.1	25.5	35.4	36.9	35	10.8	19.9	7.2	8.9	126.9	140.2	37.3	22.3	173.9	307.6	34	29.4	22.5	27.4	175.6	180.6	-59.4	0.0186163	0.104626	NULL
HR:gi_4507645_ref_NP_000356.1	0	0	5.1	5.1	4.5	2.7	0	0	0	0	0	0	2	3.2	7.2	9.1	12.4	14.8	0	0	0.35	0.710553	0.57715	NULL
HR:gi_4507651_ref_NP_003281.1	0	0	12.3	12.4	0	0	2.7	1.8	9.1	9.2	3.3	0	6	3.2	4.1	5.1	7.9	3.2	2.1	3.3	-2.8	0.150077	0.241975	NULL
HR:gi_4507761_ref_NP_003324.1	10.6	7.1	9.2	0	0	0	5.4	10.7	8.2	5.5	0	6.7	0	0	9.3	4.1	13.5	12.7	0	0	1.45	0.873338	0.638921	NULL
HR:gi_45243507_ref_NP_002926.2	7.4	8.3	9.2	7.2	2.7	0	2.7	1.8	9.1	8.2	3.3	8.9	12	6.4	0	0	0	0	15.9	16.3	-2.35	0.668852	0.558643	NULL
HR:gi_45545421_ref_NP_848638.2	14.9	22.4	6.1	10.3	17.1	18.1	8.1	8	1.8	0	5.5	12.3	12	12.8	17.5	11.2	2.3	0	14.8	14.1	1	0.176804	0.260588	NULL
HR:gi_4557759_ref_NP_000241.1	4.2	3.5	24.6	10.3	4.5	3.6	9.9	8	58.4	61.4	3.3	4.5	77.9	82.2	12.4	19.3	6.8	5.3	70.9	68.5	-32.6	0.0536667	0.135866	NULL
HR:gi_4557894_ref_NP_000230.1	10.6	20.1	9.2	12.4	1.8	3.6	13.4	12.5	12.8	21.1	7.7	5.6	8	4.3	28.9	35.5	0	2.1	3.2	9.8	3.65	0.728454	0.577591	NULL
HR:gi_46276889_ref_NP_002719.3	0	7.1	0	0	6.3	8.2	11.7	14.2	0	2.7	4.4	0	0	0	0	0	0	0	3.2	2.2	6.7	0.0471867	0.135866	NULL
HR:gi_47132620_ref_NP_000414.2	8.5	5.9	2	0	2.7	1.8	1.8	3.6	3.7	6.4	9.9	4.5	4	5.3	5.2	8.1	29.3	33.8	5.3	7.6	-3.5	0.0120965	0.104626	NULL
HR:gi_47519616_ref_NP_998839.1	0	0	12.3	11.3	0	0	2.7	1.8	9.1	10.1	3.3	0	6	3.2	4.1	4.1	6.8	4.2	3.2	4.4	-3.25	0.129252	0.227566	NULL
HR:gi_4757756_ref_NP_004030.1	6.4	9.4	0	2.1	0	0	10.8	6.2	8.2	3.7	8.8	8.9	13	12.8	2.1	2	10.1	5.3	19	33.7	-4.7	0.0754312	0.150862	NULL
HR:gi_4758146_ref_NP_004075.1	11.7	35.4	15.4	12.4	15.3	8.2	13.4	8.9	39.3	33.9	13.2	13.4	24	26.7	9.3	16.2	0	7.4	24.3	25	-7.2	0.354358	0.416527	NULL
HR:gi_4758190_ref_NP_004404.1	7.4	20.1	11.3	9.3	16.2	17.2	6.3	5.3	17.3	22	9.9	2.2	8	9.6	12.4	14.2	0	0	9.5	12	0.55	0.846997	0.634107	NULL
HR:gi_4758712_ref_NP_004659.1	13.8	3.5	0	3.1	9.9	10	1.8	0	3.7	5.5	0	0	0	0	3.1	4.1	0	0	0	4.4	3.3	0.168931	0.257236	NULL
HR:gi_4758906_ref_NP_004146.1	0	0	0	0	0	0	0	0	0	1.8	2.2	3.3	10	10.7	4.1	7.1	4.5	6.3	0	0	-3.7	0.00271718	0.0691069	NULL
HR:gi_48762934_ref_NP_000080.2	3.2	4.7	10.2	7.2	0	5.4	7.2	5.3	0	3.7	0	0	0	0	0	0	0	0	0	0	5.35	0.00049234	0.0219912	UP
HR:gi_4885049_ref_NP_005150.1	7.4	7.1	5.1	7.2	11.7	10	15.2	14.2	6.4	8.2	6.6	4.5	7	8.5	18.6	8.1	7.9	11.6	4.2	2.2	1.25	0.231755	0.313688	NULL
HR:gi_4885179_ref_NP_005208.1	11.7	35.4	15.4	12.4	15.3	8.2	13.4	8.9	39.3	33.9	13.2	13.4	24	26.7	9.3	16.2	0	7.4	24.3	25	-7.2	0.354358	0.416527	NULL
HR:gi_4885385_ref_NP_005315.1	0	0	0	0	0	0	6.3	5.3	3.7	5.5	0	0	0	0	5.2	7.1	0	2.1	0	0	0	0.618552	0.53132	NULL
HR:gi_4885629_ref_NP_005414.1	0	0	0	7.2	6.3	9.1	0	0	1.8	0	0	0	4	3.2	3.1	5.1	0	0	3.2	4.4	-2.45	1	0.67	NULL
HR:gi_5031857_ref_NP_005557.1	0	0	3.1	2.1	3.6	6.3	0	0	0	0	0	0	0	0	6.2	7.1	11.3	12.7	0	0	1.05	0.965271	0.67	NULL
HR:gi_5032009_ref_NP_005600.1	0	2.4	7.2	7.2	8.1	9.1	1.8	1.8	1.8	3.7	0	2.2	0	0	7.2	7.1	16.9	13.7	0	0	2.8	0.388286	0.430003	NULL
HR:gi_50363217_ref_NP_000286.3	21.2	18.9	18.4	15.4	19.8	19	14.3	8.9	19.2	12.8	27.4	27.9	23	29.9	36.1	24.4	5.6	5.3	28.6	27.2	-7.15	0.0825793	0.155225	NULL
HR:gi_50363219_ref_NP_001002236.1	21.2	18.9	18.4	15.4	19.8	19	14.3	8.9	19.2	12.8	27.4	27.9	23	29.9	36.1	24.4	5.6	5.3	28.6	27.2	-7.15	0.0825793	0.155225	NULL
HR:gi_50363221_ref_NP_001002235.1	21.2	18.9	18.4	15.4	19.8	19	14.3	8.9	19.2	12.8	27.4	27.9	23	29.9	36.1	24.4	5.6	5.3	28.6	27.2	-7.15	0.0825793	0.155225	NULL
HR:gi_50845386_ref_NP_001002857.1	6.4	9.4	0	2.1	0	0	10.8	6.2	8.2	3.7	8.8	8.9	13	12.8	2.1	2	10.1	5.3	19	33.7	-4.7	0.0754312	0.150862	NULL
HR:gi_50845388_ref_NP_001002858.1	6.4	9.4	0	2.1	0	0	10.8	6.2	8.2	3.7	8.8	8.9	13	12.8	2.1	2	10.1	5.3	19	33.7	-4.7	0.0754312	0.150862	NULL
HR:gi_5453712_ref_NP_006140.1	6.4	10.6	4.1	5.1	4.5	1.8	4.5	3.6	7.3	7.3	5.5	3.3	7	13.9	7.2	7.1	7.9	6.3	25.4	18.5	-2.75	0.0185278	0.104626	NULL
HR:gi_5453886_ref_NP_006208.1	0	0	0	0	0	0	0	0	0	1.8	0	4.5	10	10.7	3.1	7.1	4.5	9.5	0	0	-3.8	0.00606308	0.0691069	NULL
HR:gi_54607080_ref_NP_001862.2	78.5	98	29.7	30.9	7.2	6.3	18.8	16	20.1	19.2	12.1	15.6	80.9	102.5	188.6	150.2	52.9	67.6	69.8	65.3	-42.2	0.153492	0.241975	NULL
HR:gi_54607120_ref_NP_002334.2	0	0	7.2	5.1	0	0	0	0	11	9.2	0	0	0	2.1	2.1	3	6.8	4.2	10.6	6.5	-3.6	0.0686511	0.143738	NULL
HR:gi_55749577_ref_NP_001142.2	5.3	0	10.2	11.3	7.2	18.1	3.6	2.7	3.7	4.6	12.1	3.3	5	7.5	6.2	11.2	46.2	52.8	5.3	7.6	-0.6	0.48729	0.490953	NULL
HR:gi_55956899_ref_NP_000217.2	19.1	14.2	9.2	10.3	0	1.8	6.3	8.9	19.2	14.7	11	8.9	26	21.4	10.3	16.2	73.2	75	19	19.6	-10.05	0.00612626	0.0691069	NULL
HR:gi_56549660_ref_NP_001008222.1	161.3	144	59.4	56.6	9	8.2	36.8	36.5	73	90.7	5.5	6.7	59	65.1	164.9	164.4	21.4	19	92	84.8	-22.35	0.616029	0.53132	NULL
HR:gi_56549662_ref_NP_001008219.1	161.3	144	59.4	56.6	9	8.2	36.8	36.5	73	90.7	5.5	6.7	59	65.1	164.9	164.4	21.4	19	92	84.8	-22.35	0.616029	0.53132	NULL
HR:gi_56549664_ref_NP_001008220.1	161.3	144	59.4	56.6	9	8.2	36.8	36.5	73	90.7	5.5	6.7	59	65.1	164.9	164.4	21.4	19	92	84.8	-22.35	0.616029	0.53132	NULL
HR:gi_5729962_ref_NP_006676.1	207	0	241.8	221.4	22.5	42.6	172.1	90.8	0	0	80	19	48	83.3	150.5	95.4	29.3	20.1	96.2	84.8	67.45	0.152873	0.241975	NULL
HR:gi_5803011_ref_NP_001966.1	0	0	15.4	15.4	0	8.2	0	0	0	0	0	0	13	12.8	15.5	18.3	5.6	9.5	0	0	-2.8	0.64215	0.548077	NULL
HR:gi_58331211_ref_NP_056933.2	7.4	13	8.2	22.7	2.7	1.8	8.1	8.9	5.5	8.2	2.2	0	20	7.5	7.2	7.1	3.4	9.5	13.7	17.4	0.8	0.757532	0.590171	NULL
HR:gi_58331214_ref_NP_005738.3	563.6	710.5	657.8	992.7	900.7	1068.7	1034.7	940.7	396.2	390.4	811.5	615.8	544.6	629	625.7	644.5	455	500.4	570.1	735.3	327.75	0.00486202	0.0691069	NULL
HR:gi_60097902_ref_NP_002007.1	0	0	0	2.1	0	0	0	0	0	4.6	0	4.5	23	18.2	0	0	0	0	5.3	7.6	-2.25	0.0634788	0.135866	NULL
HR:gi_62526043_ref_NP_009203.2	139.1	200.6	69.7	95.8	33.3	36.2	86.1	88.1	41.1	49.5	24.1	53.6	76.9	71.6	62.9	65	38.3	36.9	74	95.7	28.85	0.132464	0.227566	NULL
HR:gi_63252896_ref_NP_001018004.1	13.8	10.6	14.3	5.1	16.2	21.7	16.1	7.1	6.4	8.2	4.4	8.9	7	8.5	11.3	11.2	19.1	16.9	2.1	4.4	5.7	0.132318	0.227566	NULL
HR:gi_63252898_ref_NP_001018005.1	13.8	7.1	14.3	5.1	11.7	20.8	3.6	4.4	9.1	7.3	0	2.2	0	6.4	6.2	11.2	16.9	11.6	2.1	3.3	3.1	0.153337	0.241975	NULL
HR:gi_63252900_ref_NP_001018006.1	13.8	10.6	14.3	5.1	16.2	21.7	16.1	7.1	6.4	6.4	4.4	8.9	7	8.5	10.3	11.2	19.1	16.9	2.1	4.4	6.3	0.0969125	0.177894	NULL
HR:gi_63252902_ref_NP_001018007.1	0	5.9	14.3	5.1	0	1.8	14.3	6.2	6.4	8.2	4.4	8.9	7	5.3	11.3	7.1	12.4	13.7	2.1	4.4	-1.55	0.334302	0.40724	NULL
HR:gi_63252904_ref_NP_001018008.1	0	0	13.3	5.1	0	0	0	2.7	6.4	6.4	0	0	0	2.1	6.2	6.1	9	7.4	0	2.2	-4.15	0.274646	0.36081	NULL
HR:gi_63252906_ref_NP_001018020.1	0	5.9	14.3	5.1	0	1.8	14.3	6.2	6.4	6.4	4.4	8.9	7	5.3	10.3	7.1	12.4	13.7	2.1	4.4	-1.2	0.33412	0.40724	NULL
HR:gi_66346730_ref_NP_001015001.1	0	2.4	10.2	10.3	5.4	4.5	1.8	1.8	10	9.2	0	0	11	11.7	14.4	15.2	11.3	14.8	29.6	27.2	-8.05	0.027597	0.106781	NULL
HR:gi_6679625_ref_NP_031378.1	212.3	199.5	309.4	526.2	224.1	257.2	312.9	302.6	120.5	132.9	200.7	185.2	224.9	212.5	218.5	204	177.9	170	244.3	333.9	77.55	0.0278905	0.106781	NULL
HR:gi_67191208_ref_NP_066289.2	10.6	7.1	9.2	0	0	0	5.4	10.7	8.2	5.5	0	6.7	0	0	9.3	9.1	13.5	12.7	0	0	0.15	1	0.67	NULL
HR:gi_68161541_ref_NP_001020083.1	11.7	8.3	4.1	6.2	8.1	9.1	5.4	4.4	9.1	11.9	5.5	5.6	12	15	3.1	5.1	10.1	13.7	5.3	6.5	-0.65	0.395888	0.431293	NULL
HR:gi_71037379_ref_NP_002854.3	0	0	0	0	5.4	5.4	0	0	0	0	0	0	0	0	2.1	3	11.3	8.4	0	0	0	0.739054	0.581136	NULL
HR:gi_73623033_ref_NP_001027018.1	0	0	3.1	0	0	0	0	0	0	1.8	2.2	3.3	10	10.7	3.1	7.1	4.5	6.3	0	2.2	-3.2	0.00460577	0.0691069	NULL
HR:gi_7669492_ref_NP_002037.2	8.5	5.9	11.3	15.4	7.2	10.9	5.4	5.3	9.1	11.9	3.3	12.3	13	6.4	11.3	9.1	12.4	17.9	2.1	5.4	-2.35	0.511483	0.504275	NULL
HR:gi_77539055_ref_NP_001029102.1	10.6	7.1	9.2	0	0	0	5.4	10.7	8.2	5.5	0	6.7	0	0	9.3	4.1	13.5	12.7	0	0	1.45	0.873338	0.638921	NULL
HR:gi_77539758_ref_NP_001029249.1	3.2	7.1	16.4	11.3	9.9	8.2	8.1	11.6	15.5	13.7	4.4	10	16	12.8	19.6	21.3	20.3	13.7	11.6	3.3	-4.65	0.0638775	0.135866	NULL
HR:gi_88952247_ref_XP_942927.1	57.3	83.8	28.7	24.7	6.3	7.2	29.6	33.8	34.7	46.7	0	0	40	36.3	99	72.1	14.6	13.7	56.1	59.8	-9	0.562687	0.53132	NULL
HR:gi_88976633_ref_XP_935204.1	0	0	0	0	0	0	6.3	5.3	2.7	2.7	0	0	0	0	5.2	7.1	0	2.1	0	0	0	0.683577	0.561959	NULL
HR:gi_89031073_ref_XP_932179.1	8.5	8.3	9.2	6.2	23.4	21.7	16.1	16.9	8.2	9.2	14.3	23.4	13	13.9	14.4	15.2	7.9	10.6	16.9	16.3	-1.45	1	0.67	NULL
HR:gi_89040258_ref_XP_935155.1	17	22.4	19.5	19.6	36	38.9	12.6	15.1	14.6	17.4	27.4	27.9	33	34.2	24.7	20.3	36	33.8	31.7	30.5	-9.65	0.246982	0.330956	NULL
HR:gi_89041044_ref_XP_942122.1	9.6	16.5	0	6.2	0	0	9	8	12.8	14.7	4.4	0	31	9.6	6.2	8.1	3.4	0	14.8	20.7	-1.75	0.330816	0.40724	NULL
HR:gi_89065345_ref_XP_947720.1	70.1	81.4	34.8	31.9	6.3	7.2	28.7	28.5	43.8	56.8	4.4	4.5	37	43.8	89.7	68	9	8.4	52.9	43.5	-13.35	0.671206	0.558643	NULL
HR:gi_93141226_ref_NP_003390.4	15.9	7.1	2	2.1	1.8	5.4	10.8	9.8	21	22.9	2.2	0	59	69.4	32	20.3	7.9	6.3	60.3	65.3	-15.7	0.0338654	0.116358	NULL
HR:gi_94721246_ref_NP_001623.3	0	2.4	0	0	0	3.6	2.7	1.8	13.7	11.9	0	0	8	10.7	5.2	6.1	2.3	2.1	9.5	21.8	-6.15	0.0210813	0.104626	NULL
HR:gi_9845267_ref_NP_063946.1	10.6	8.3	8.2	8.2	20.7	18.1	9.9	11.6	9.1	9.2	13.2	22.3	10	15	12.4	16.2	4.5	9.5	16.9	15.2	-2.55	0.511801	0.504275	NULL
HR:gi_98986445_ref_NP_004354.2	11.7	10.6	5.1	12.4	11.7	10.9	6.3	5.3	20.1	23.8	8.8	6.7	25	31	8.2	9.1	24.8	22.2	24.3	28.3	-12.25	0.0337984	0.116358	NULL
HR:gi_98986453_ref_NP_002461.2	2.1	4.7	16.4	15.4	6.3	12.7	11.7	12.5	11.9	13.7	5.5	5.6	9	8.5	39.2	37.6	12.4	13.7	5.3	4.4	1.65	0.969217	0.67	NULL

## Sheet: Healthy_vs_CCD_MicrobialOnly
Protein	6a_2	6a_3	6b_1	6b_2	16b_2	16b_3	18b_1	18b_2	9a_1	9a_2	9b_1	09b_2	Difference	Pvalue	Qvalue	Change
CLST000005 TIGR:TIGR00485,COG:COG0050,KEGG:K02358 GTPases - translation elongation factors	0	3.5	1	1	6.3	9.1	0.9	1.8	0	0	8.1	6.9	-2.05	0.931726	0.313203	NULL
CLST000006 TIGR:TIGR01067,KEGG:K02874,COG:COG0093 Ribosomal protein L14	13.8	18.9	5.1	1	10.8	8.2	5.4	8	4.5	5.4	6	8.9	2.4	0.496152	0.19395	NULL
CLST000011 COG:COG0100,TIGR:TIGR03631,KEGG:K02948,TIGR:TIGR03632 Ribosomal protein S11	13.8	15.3	10.2	8.2	32.4	29	26.9	26.7	9	6.3	10.1	4	13.35	0.021856	0.0229222	UP
CLST000029 PFAM:PF00004.22,COG:COG3451,PFAM:PF02861.13,KEGG:K03695,TIGR:TIGR03346,COG:COG0542 ATPases with chaperone activity, ATP-binding subunit	13.8	18.9	13.3	12.4	9.9	10	3.6	4.4	5.4	8.2	11.1	7.9	3.15	0.350238	0.144117	NULL
CLST000052 TIGR:TIGR00483,TIGR:TIGR00485,COG:COG0050,KEGG:K02358,TIGR:TIGR00475 GTPases - translation elongation factors	5.3	8.3	0	0	0	0	12.6	9.8	9.9	10	12.1	16.8	-8.4	0.0306847	0.028218	DOWN
CLST000208 NOG:NOG10616 Annotation not available	35	44.8	53.3	57.7	46.8	48.9	47.5	45.4	23.3	25.4	24.2	2	23.4	0.0084748	0.0127865	UP
CLST000238 TIGR:TIGR01829,TIGR:TIGR01963,TIGR:TIGR01830,KEGG:K00046,TIGR:TIGR01832,TIGR:TIGR02415,COG:COG1028 Dehydrogenases with different specificities (related to short-chain alcohol dehydrogenases)	22.3	17.7	5.1	3.1	8.1	10.9	9.9	12.5	0	0	6	3	8.9	0.0216256	0.0229222	UP
CLST000254 TIGR:TIGR00224,COG:COG1866,KEGG:K01610 Phosphoenolpyruvate carboxykinase (ATP)	74.3	115.7	129.1	132.8	110.7	115	60.1	65.9	36.7	31.7	27.2	32.7	80.65	0.0084748	0.0127865	UP
CLST000335 COG:COG0822 NifU homolog involved in Fe-S cluster formation	21.2	21.2	30.7	41.2	74.7	83.3	56.5	54.3	44.8	41.7	9.1	5.9	22.35	0.20194	0.0898701	NULL
CLST000357 TIGR:TIGR01534,COG:COG0057,KEGG:K00134 Glyceraldehyde-3-phosphate dehydrogenase/erythrose-4-phosphate dehydrogenase	5.3	4.7	9.2	13.4	0	0	11.7	8	0	0	4	3	5.15	0.100494	0.0572348	NULL
CLST000603 COG:COG0057,PFAM:PF00044.17,TIGR:TIGR01534,KEGG:K00134 Glyceraldehyde-3-phosphate dehydrogenase/erythrose-4-phosphate dehydrogenase	165.6	199.5	126	134.9	252.9	317.9	201.7	200.2	52	45.3	115.9	97	125.35	0.0084748	0.0127865	UP
CLST000797 TIGR:TIGR00485,COG:COG0050,KEGG:K02358,TIGR:TIGR03680,TIGR:TIGR00475 GTPases - translation elongation factors	49.9	36.6	56.4	52.5	78.3	81.5	20.6	24	44.8	23.6	17.1	9.9	30.85	0.0507985	0.034399	UP
CLST000998 KEGG:K02867,COG:COG0080,TIGR:TIGR01632,PFAM:PF03946.7 Ribosomal protein L11	15.9	24.8	19.5	18.5	22.5	24.5	26	22.2	9.9	11.8	8.1	11.9	11.5	0.0084748	0.0127865	UP
CLST001044 TIGR:TIGR00485,COG:COG0050,KEGG:K02358 GTPases - translation elongation factors	21.2	29.5	11.3	5.1	57.6	45.3	40.3	31.1	0	0	0	0	30.3	0.00736638	0.0127865	UP
CLST001471 TIGR:TIGR00981,KEGG:K02950,COG:COG0048 Ribosomal protein S12	4.2	7.1	4.1	3.1	5.4	9.1	3.6	6.2	7.2	0	0	0	4.8	0.145986	0.0703294	NULL
CLST001935 TIGR:TIGR01938,COG:COG1592,KEGG:K00348,PFAM:PF02915.10 Rubrerythrin	63.7	74.4	44.1	37.1	99	115	44.8	48.9	58.2	62.6	62.5	50.5	-4.05	1	0.326996	NULL
CLST002489 KEGG:K02867,COG:COG0080,TIGR:TIGR01632 Ribosomal protein L11	9.6	11.8	11.3	7.2	10.8	13.6	14.3	11.6	0	0	0	0	11.45	0.00736638	0.0127865	UP
CLST002546 KEGG:K03046,COG:COG0086,TIGR:TIGR02388,TIGR:TIGR02386 DNA-directed RNA polymerase, beta subunit/160 kD subunit	22.3	24.8	3.1	1	15.3	15.4	10.8	9.8	0	0	0	0	13.05	0.00736638	0.0127865	UP
CLST002554 TIGR:TIGR00855,COG:COG0222,KEGG:K02935 Ribosomal protein L7/L12	8.5	10.6	3.1	2.1	36	22.6	17.9	28.5	0	0	0	0	14.25	0.00736638	0.0127865	UP
CLST002684 TIGR:TIGR01418,COG:COG3605,TIGR:TIGR01828,KEGG:K01006,COG:COG0574 Phosphoenolpyruvate synthase/pyruvate phosphate dikinase	3.2	2.4	0	1	12.6	15.4	8.1	11.6	0	0	0	0	5.65	0.0174306	0.0208199	UP
CLST002816 COG:COG0479,KEGG:K00240 Succinate dehydrogenase/fumarate reductase, Fe-S protein subunit	14.9	14.2	15.4	16.5	11.7	13.6	9.9	4.4	0	0	0	0	13.9	0.00736638	0.0127865	UP
CLST003058 KEGG:K04043,COG:COG0443,TIGR:TIGR02350 Molecular chaperone	19.1	15.3	4.1	2.1	18.9	12.7	14.3	15.1	0	0	0	0	14.7	0.00736638	0.0127865	UP
CLST003095 KEGG:K02982,COG:COG0092,TIGR:TIGR01009 Ribosomal protein S3	10.6	0	0	0	8.1	8.2	5.4	4.4	0	0	0	0	4.9	0.0719823	0.0442049	NULL
CLST003109 COG:COG0459,TIGR:TIGR02348,KEGG:K04077 Chaperonin GroEL (HSP60 family)	35	24.8	11.3	10.3	24.3	22.6	49.3	40	0	0	0	0	24.55	0.00736638	0.0127865	UP
CLST003218 TIGR:TIGR01169,COG:COG0081,KEGG:K02863,NOG:NOG131359 Protein involved in regulation of translation	0	2.4	2	3.1	6.3	12.7	7.2	6.2	0	0	0	0	4.65	0.0174306	0.0208199	NULL
CLST003280 TIGR:TIGR01811,COG:COG1053,KEGG:K00239 Succinate dehydrogenase/fumarate reductase, flavoprotein subunit	45.6	61.4	34.8	25.7	38.7	39.8	16.1	14.2	0	0	0	0	36.75	0.00736638	0.0127865	UP
CLST003282 COG:COG0148,KEGG:K01689,TIGR:TIGR01060 Enolase	36.1	35.4	5.1	4.1	6.3	6.3	8.1	11.6	0	0	0	0	7.2	0.00725995	0.0127865	UP
CLST003298 TIGR:TIGR02013,COG:COG0085,KEGG:K03043,PFAM:PF00562.21 DNA-directed RNA polymerase, beta subunit/140 kD subunit	21.2	24.8	4.1	5.1	18.9	25.4	17.9	10.7	0	0	0	0	18.4	0.00736638	0.0127865	UP
CLST003335 TIGR:TIGR01394,COG:COG0480,TIGR:TIGR00484,KEGG:K02355 Translation elongation factors (GTPases)	4.2	9.4	1	0	16.2	14.5	9	4.4	8.1	10	0	0	2.65	0.441485	0.175431	NULL
CLST003337 COG:COG0052,TIGR:TIGR01011,KEGG:K02967 Ribosomal protein S2	0	3.5	2	5.1	19.8	23.5	6.3	5.3	0	0	0	0	5.2	0.0174306	0.0208199	UP
CLST003352 TIGR:TIGR00717,PFAM:PF00575.16,COG:COG0539,KEGG:K02945 Ribosomal protein S1	7.4	3.5	2	0	13.5	4.5	8.1	6.2	0	0	0	0	5.35	0.0174306	0.0208199	UP
CLST003365 NOG:NOG125984,TIGR:TIGR03496,COG:COG0055,KEGG:K02112,TIGR:TIGR01039 ATP synthase	10.6	7.1	10.2	4.1	6.3	10	15.2	12.5	0	0	0	0	10.1	0.00736638	0.0127865	UP
CLST003527 TIGR:TIGR00485,COG:COG0050,KEGG:K02358 GTPases - translation elongation factors	2.1	0	6.1	13.4	0	0	5.4	11.6	0.9	0	0	0	3.75	0.146954	0.0703294	NULL
CLST003596 TIGR:TIGR01859,COG:COG0191,KEGG:K01624 Fructose/tagatose bisphosphate aldolase	9.6	10.6	2	2.1	16.2	17.2	15.2	9.8	0	0	0	0	10.2	0.00736638	0.0127865	UP
CLST003653 KEGG:K03040,TIGR:TIGR02027,COG:COG0202 DNA-directed RNA polymerase, alpha subunit/40 kD subunit	3.2	7.1	3.1	0	9.9	10	10.8	8.9	0	0	0	0	8	0.0174306	0.0208199	UP
CLST003692 COG:COG0517,KEGG:K00088,COG:COG0516,TIGR:TIGR01302 IMP dehydrogenase/GMP reductase	14.9	9.4	9.2	7.2	5.4	6.3	10.8	8	0	0	0	0	8.6	0.00736638	0.0127865	UP
CLST005286 KEGG:K00262,PFAM:PF02812.11,COG:COG0334,PFAM:PF00208.14 Glutamate dehydrogenase/leucine dehydrogenase	8.5	5.9	8.2	3.1	18	17.2	3.6	2.7	0	0	0	0	7.05	0.00736638	0.0127865	UP
CLST005426 KEGG:K01687,TIGR:TIGR00110,COG:COG0129,TIGR:TIGR01196 Dihydroxyacid dehydratase/phosphogluconate dehydratase	5.3	5.9	5.1	8.2	0	1.8	0.9	1.8	0	0	4	0	3.45	0.0832645	0.0490406	NULL
CLST005448 KEGG:K02886,TIGR:TIGR01171,COG:COG0090 Ribosomal protein L2	11.7	10.6	7.2	5.1	14.4	8.2	5.4	6.2	4.5	0	0	0	7.7	0.00802185	0.0127865	UP
CLST005531 TIGR:TIGR01859,COG:COG0191,KEGG:K01624 Fructose/tagatose bisphosphate aldolase	35	37.8	35.9	45.3	68.4	71.5	34.1	26.7	34	39.9	22.2	14.8	8.75	0.106637	0.0576779	NULL
CLST005542 COG:COG0057,TIGR:TIGR01534,KEGG:K00134 Glyceraldehyde-3-phosphate dehydrogenase/erythrose-4-phosphate dehydrogenase	51	60.2	45.1	35	77.4	70.6	51.1	47.2	0	0	0	0	51.05	0.00736638	0.0127865	UP
CLST005618 TIGR:TIGR00465,COG:COG0059,PFAM:PF01450.12,PFAM:PF07991.5,KEGG:K00053 Ketol-acid reductoisomerase	29.7	43.7	63.5	56.6	44.1	41.7	25.1	23.1	28.7	25.4	28.2	25.7	15.75	0.20273	0.0898701	NULL
CLST005644 COG:COG4864,PFAM:PF12127.1 Uncharacterized protein conserved in bacteria	4.2	7.1	0	0	6.3	4.5	6.3	5.3	0	0	0	0	4.9	0.0367006	0.028218	NULL
CLST005666 COG:COG0459,TIGR:TIGR02348,KEGG:K04077 Chaperonin GroEL (HSP60 family)	141.2	162.9	108.6	84.4	93.6	90.6	46.6	35.6	42.1	39.9	61.5	32.7	51.1	0.0507985	0.034399	UP
CLST005695 COG:COG1932,TIGR:TIGR01364,KEGG:K00831 Phosphoserine aminotransferase	4.2	3.5	16.4	19.6	18	20.8	6.3	7.1	7.2	5.4	2	0	8.05	0.106637	0.0576779	NULL
CLST005732 KEGG:K00615,TIGR:TIGR00232,COG:COG0021 Transketolase	9.6	5.9	2	3.1	10.8	13.6	1.8	2.7	0	0	0	0	4.5	0.00736638	0.0127865	NULL
CLST005780 TIGR:TIGR03631,PFAM:PF00416.15,COG:COG0099,KEGG:K02952 Ribosomal protein S13	6.4	3.5	3.1	1	11.7	9.1	9.9	8.9	9.9	11.8	0	0	2.7	0.864665	0.297526	NULL
CLST005782 KEGG:K01603,TIGR:TIGR01117,KEGG:K01966,COG:COG4799 Acetyl-CoA carboxylase, carboxyltransferase component (subunits alpha and beta)	18	20.1	8.2	9.3	12.6	18.1	7.2	4.4	0	0	0	0	10.95	0.00736638	0.0127865	UP
CLST005801 KEGG:K00262,PFAM:PF02812.11,COG:COG0334,PFAM:PF00208.14 Glutamate dehydrogenase/leucine dehydrogenase	32.9	40.1	23.6	23.7	18.9	18.1	21.5	19.6	0	0	0	0	22.55	0.00736638	0.0127865	UP
CLST005804 COG:COG0094,PFAM:PF00673.14,PFAM:PF00281.12,KEGG:K02931 Ribosomal protein L5	29.7	20.1	26.6	17.5	50.4	43.5	12.6	16	19.7	18.1	14.1	0	7.25	0.148837	0.0703294	NULL
CLST005825 TIGR:TIGR00855,COG:COG0222,KEGG:K02935 Ribosomal protein L7/L12	40.3	30.7	34.8	31.9	54	48.9	25.1	25.8	12.5	18.1	18.1	10.9	18.05	0.00836037	0.0127865	UP
CLST005840 PFAM:PF02787.12,KEGG:K01955,COG:COG0458,PFAM:PF02786.10,PFAM:PF00289.15,TIGR:TIGR01369 Carbamoylphosphate synthase large subunit (split gene in MJ)	1.1	7.1	7.2	0	3.6	5.4	6.3	7.1	0	0	0	0	5.85	0.0172199	0.0208199	UP
CLST005841 TIGR:TIGR01044,KEGG:K02890,COG:COG0091 Ribosomal protein L22	0	15.3	10.2	8.2	9.9	10	9.9	8.9	7.2	6.3	3	0	5.25	0.040829	0.0307986	UP
CLST005842 PFAM:PF04560.13,TIGR:TIGR02013,COG:COG0085,PFAM:PF10385.2,PFAM:PF04565.9,KEGG:K03043,PFAM:PF00562.21,PFAM:PF04561.7,TIGR:TIGR03670 DNA-directed RNA polymerase, beta subunit/140 kD subunit	9.6	13	33.8	22.7	18.9	28.1	7.2	8	7.2	12.7	7.1	4	8.8	0.0411842	0.0307986	UP
CLST005865 TIGR:TIGR01029,COG:COG0049,KEGG:K02992 Ribosomal protein S7	17	26	18.4	14.4	35.1	34.4	19.7	14.2	16.1	9.1	6	2	11.5	0.021856	0.0229222	UP
CLST005872 COG:COG0052,TIGR:TIGR01011,KEGG:K02967 Ribosomal protein S2	11.7	15.3	7.2	8.2	17.1	13.6	17.9	4.4	9.9	11.8	6	0	4.7	0.20273	0.0898701	NULL
CLST005915 KEGG:K04043,COG:COG0443,TIGR:TIGR02350 Molecular chaperone	47.8	59	37.9	31.9	43.2	29.9	14.3	10.7	15.2	14.5	26.2	12.9	20.05	0.148837	0.0703294	NULL
CLST005929 COG:COG0185,TIGR:TIGR01050,KEGG:K02965 Ribosomal protein S19	14.9	8.3	5.1	6.2	15.3	8.2	7.2	0.9	7.2	6.3	2	4.9	2.1	0.233663	0.10098	NULL
CLST005988 KEGG:K02887,TIGR:TIGR01032,COG:COG0292 Ribosomal protein L20	0	3.5	7.2	5.1	2.7	5.4	4.5	5.3	3.6	0	2	0	3.8	0.0725041	0.0442049	NULL
CLST005996 KEGG:K02994,COG:COG0096,PFAM:PF00410.12 Ribosomal protein S8	23.4	31.9	23.6	17.5	26.1	30.8	9	7.1	17	13.6	14.1	10.9	9.65	0.20273	0.0898701	NULL
CLST006000 PFAM:PF00709.14,KEGG:K01939,TIGR:TIGR00184,COG:COG0104 Adenylosuccinate synthase	8.5	10.6	2	2.1	7.2	5.4	2.7	1.8	5.4	9.1	0	3	-0.15	1	0.326996	NULL
CLST006170 TIGR:TIGR03627,COG:COG0103,KEGG:K02996,PFAM:PF00380.12 Ribosomal protein S9	19.1	17.7	18.4	13.4	20.7	21.7	9	7.1	12.5	7.3	4	0	12.4	0.0337522	0.028218	UP
CLST006191 TIGR:TIGR01393,TIGR:TIGR00484,KEGG:K02355,COG:COG0480 Translation elongation factors (GTPases)	41.4	47.2	49.2	42.2	53.1	52.5	28.7	24.9	24.2	20.9	13.1	13.9	27.3	0.0084748	0.0127865	UP
CLST006216 TIGR:TIGR02176,COG:COG1014,KEGG:K03737,COG:COG0674,COG:COG1013 Pyruvate:ferredoxin oxidoreductase and related 2-oxoacid:ferredoxin oxidoreductases, beta subunit	40.3	33	20.5	20.6	46.8	50.7	21.5	17.8	0	0	0	0	27.25	0.00736638	0.0127865	UP
CLST006298 TIGR:TIGR01169,COG:COG0081,KEGG:K02863 Ribosomal protein L1	20.2	29.5	16.4	11.3	62.1	73.4	18.8	17.8	52	43.5	4	2	-4.25	0.552214	0.207382	NULL
CLST006300 KEGG:K01006,TIGR:TIGR01417,TIGR:TIGR01828,COG:COG0574 Phosphoenolpyruvate synthase/pyruvate phosphate dikinase	97.7	122.7	138.3	139	229.5	235.5	137.2	141.5	69	67.1	41.3	34.6	84.45	0.0084748	0.0127865	UP
CLST006373 KEGG:K10112,TIGR:TIGR01187,TIGR:TIGR01186,PFAM:PF03459.10,TIGR:TIGR02142,TIGR:TIGR03258,TIGR:TIGR02315,TIGR:TIGR03265,TIGR:TIGR00968,COG:COG3839,TIGR:TIGR03269 ABC-type sugar transport systems, ATPase components	15.9	20.1	42	41.2	57.6	43.5	18.8	19.6	2.7	7.3	11.1	1	25.65	0.0084748	0.0127865	UP
CLST006421 PFAM:PF03764.11,PFAM:PF00679.17,TIGR:TIGR00484,KEGG:K02355,COG:COG0480,TIGR:TIGR00490 Translation elongation factors (GTPases)	8.5	2.4	0	3.1	11.7	8.2	8.1	7.1	0	0	0	0	7.6	0.0174306	0.0208199	UP
CLST006584 KEGG:K00088,TIGR:TIGR01302,COG:COG0517,COG:COG0516 IMP dehydrogenase/GMP reductase	9.6	16.5	37.9	29.9	7.2	11.8	2.7	0.9	8.1	12.7	3	0	5.15	0.350238	0.144117	NULL
CLST006673 TIGR:TIGR01049,COG:COG0051,TIGR:TIGR01046,KEGG:K02946 Ribosomal protein S10	13.8	17.7	13.3	10.3	25.2	35.3	4.5	8	10.8	17.2	9.1	5.9	3.6	0.444696	0.175431	NULL
CLST006805 TIGR:TIGR00012,PFAM:PF00831.16,KEGG:K02904,COG:COG0255 Ribosomal protein L29	4.2	0	3.1	0	6.3	1.8	1.8	5.3	4.5	3.6	7.1	5.9	-2.75	0.105412	0.0576779	NULL
CLST006834 PFAM:PF00162.12,COG:COG0126,KEGG:K00927 3-phosphoglycerate kinase	35	23.6	65.6	75.2	61.2	60.7	13.4	15.1	16.1	16.3	16.1	8.9	31.75	0.106024	0.0576779	NULL
CLST006844 COG:COG0102,KEGG:K02871,TIGR:TIGR01066 Ribosomal protein L13	21.2	16.5	12.3	13.4	26.1	18.1	2.7	3.6	6.3	7.3	4	0	9.8	0.106637	0.0576779	NULL
CLST006878 KEGG:K03530,PFAM:PF00216.14,COG:COG0776 Bacterial nucleoid DNA-binding protein	10.6	17.7	14.3	13.4	13.5	14.5	0	0	9.9	3.6	7.1	6.9	6.45	0.20194	0.0898701	NULL
CLST006883 TIGR:TIGR03496,KEGG:K02114,KEGG:K02112,PFAM:PF00401.13,TIGR:TIGR03498,COG:COG0055,TIGR:TIGR03305,TIGR:TIGR01039 F0F1-type ATP synthase, beta subunit	4.2	4.7	7.2	7.2	8.1	10	3.6	2.7	1.8	2.7	4	2	3.6	0.026712	0.027348	NULL
CLST006904 KEGG:K02892,PFAM:PF00276.13,COG:COG0089,TIGR:TIGR03636 Ribosomal protein L23	8.5	7.1	9.2	7.2	11.7	11.8	0	1.8	9.9	8.2	11.1	3	-1.2	0.798907	0.278162	NULL
CLST006921 NOG:NOG118713 Protein involved in phosphoenolpyruvate-dependent sugar phosphotransferase system	7.4	4.7	4.1	8.2	9.9	10.9	4.5	3.6	6.3	6.3	4	3	0.9	0.268768	0.113657	NULL
CLST007033 KEGG:K00656,TIGR:TIGR01255,COG:COG1882 Pyruvate-formate lyase	19.1	20.1	59.4	48.4	81.9	72.5	14.3	17.8	14.3	10.9	30.2	23.7	15.25	0.233663	0.10098	NULL
CLST007119 KEGG:K03046,TIGR:TIGR02389,PFAM:PF04997.5,TIGR:TIGR02388,COG:COG0086,TIGR:TIGR02387,TIGR:TIGR02386 DNA-directed RNA polymerase, beta subunit/160 kD subunit	20.2	20.1	20.5	21.6	24.3	23.5	6.3	10.7	12.5	13.6	3	4.9	11.65	0.0507985	0.034399	UP
CLST007120 KEGG:K00616,TIGR:TIGR00875,COG:COG0176 Transaldolase	30.8	27.1	34.8	22.7	30.6	34.4	9	7.1	8.1	9.1	11.1	2	20.25	0.0745316	0.0442049	UP
CLST007181 COG:COG0148,KEGG:K01689,TIGR:TIGR01060 Enolase	3.2	2.4	0	0	18	17.2	6.3	8	3.6	1.8	0	0	3.85	0.19474	0.0898701	NULL
CLST007182 TIGR:TIGR00978,COG:COG0136,KEGG:K00133,TIGR:TIGR01296 Aspartate-semialdehyde dehydrogenase	2.1	4.7	9.2	7.2	14.4	15.4	0.9	1.8	0.9	0.9	0	0	5.5	0.0129728	0.0192355	UP
CLST007213 COG:COG0261,KEGG:K02888,TIGR:TIGR00061 Ribosomal protein L21	9.6	11.8	3.1	3.1	2.7	1.8	0	0	5.4	6.3	0	3	-1.3	0.931726	0.313203	NULL
CLST007226 KEGG:K02986,COG:COG0522,TIGR:TIGR01017 Ribosomal protein S4 and related proteins	14.9	18.9	20.5	11.3	22.5	26.3	2.7	5.3	10.8	14.5	5	4	9	0.148837	0.0703294	NULL
CLST007253 KEGG:K01756,TIGR:TIGR00928,COG:COG0015 Adenylosuccinate lyase	5.3	8.3	7.2	5.1	9.9	11.8	5.4	2.7	4.5	4.5	0	0	4.05	0.0213961	0.0229222	NULL
CLST007258 TIGR:TIGR01771,COG:COG0039,TIGR:TIGR01763,KEGG:K00026 Malate/lactate dehydrogenases	9.6	4.7	5.1	8.2	13.5	13.6	4.5	6.2	0	0	0	0	7.2	0.00736638	0.0127865	UP
CLST007262 KEGG:K02982,TIGR:TIGR01009,COG:COG0092 Ribosomal protein S3	21.2	11.8	15.4	25.7	27.9	29.9	19.7	18.7	16.1	19	4	3	10.4	0.0745316	0.0442049	UP
CLST007269 COG:COG0098,KEGG:K02988,TIGR:TIGR01021 Ribosomal protein S5	21.2	37.8	24.6	21.6	38.7	46.2	18.8	15.1	13.4	15.4	7.1	3	12.85	0.0137894	0.0194408	UP
CLST007338 TIGR:TIGR01235,COG:COG5016,TIGR:TIGR01108,KEGG:K01571 Pyruvate/oxaloacetate carboxyltransferase	13.8	17.7	25.6	20.6	17.1	13.6	6.3	4.4	5.4	8.2	2	1	11.75	0.0337522	0.028218	UP
CLST007355 TIGR:TIGR01024,COG:COG0335,KEGG:K02884 Ribosomal protein L19	4.2	9.4	10.2	11.3	10.8	15.4	4.5	3.6	8.1	8.2	0	0	5.75	0.106024	0.0576779	NULL
CLST007389 KEGG:K02933,COG:COG0097,TIGR:TIGR03654 Ribosomal protein L6P/L9E	18	13	7.2	7.2	15.3	13.6	1.8	2.7	5.4	6.3	6	0	4.4	0.106024	0.0576779	NULL
CLST007424 COG:COG0244,KEGG:K02864,NOG:NOG79906 Annotation not available	11.7	14.2	14.3	14.4	36	34.4	16.1	14.2	0	0	0	0	14.35	0.00725995	0.0127865	UP
CLST007461 KEGG:K04078,PFAM:PF00166.14,COG:COG0234 Co-chaperonin GroES (HSP10)	30.8	30.7	19.5	13.4	10.8	14.5	2.7	1.8	13.4	13.6	14.1	4.9	0.45	0.733647	0.26399	NULL
CLST007506 KEGG:K03561,COG:COG0811,PFAM:PF01618.9 Biopolymer transport proteins	13.8	10.6	18.4	18.5	20.7	28.1	8.1	13.3	0	0	0	0	16.1	0.00736638	0.0127865	UP
CLST007573 COG:COG1185,KEGG:K00962,TIGR:TIGR03591 Polyribonucleotide nucleotidyltransferase (polynucleotide phosphorylase)	17	7.1	19.5	14.4	1.8	5.4	0	0	1.8	0.9	2	1	4.85	0.306482	0.128573	NULL
CLST007632 COG:COG0088,KEGG:K02926,PFAM:PF00573.15,NOG:NOG125323 Annotation not available	3.2	0	9.2	11.3	8.1	9.1	6.3	5.3	0	0	0	0	7.2	0.0174306	0.0208199	UP
CLST007639 PFAM:PF02810.8,KEGG:K03070,PFAM:PF07516.6,TIGR:TIGR00963,COG:COG0653,TIGR:TIGR03714 Preprotein translocase subunit SecA (ATPase, RNA helicase)	7.4	7.1	0	0	9	8.2	0.9	0	0	0	0	0	4	0.0719823	0.0442049	NULL
CLST007642 COG:COG0203,TIGR:TIGR00059,PFAM:PF01196.12,KEGG:K02879 Ribosomal protein L17	19.1	17.7	12.3	10.3	23.4	17.2	2.7	7.1	4.5	10.9	2	0	11.5	0.0507985	0.034399	UP
CLST007668 COG:COG0330 Membrane protease subunits, stomatin/prohibitin homologs	7.4	7.1	9.2	9.3	1.8	8.2	3.6	4.4	0	0	0	0	7.25	0.00736638	0.0127865	UP
CLST007711 KEGG:K00688,PFAM:PF11897.1,TIGR:TIGR02094,COG:COG0058 Glucan phosphorylase	9.6	5.9	6.1	6.2	5.4	5.4	3.6	1.8	0	0	0	0	5.65	0.00725995	0.0127865	UP
CLST007783 TIGR:TIGR01936,COG:COG1726,PFAM:PF11973.1,KEGG:K00346,PFAM:PF05896.4 Na+-transporting NADH:ubiquinone oxidoreductase, subunit NqrA	7.4	11.8	8.2	5.1	2.7	5.4	4.5	4.4	0	0	0	0	5.25	0.00736638	0.0127865	UP
CLST007784 COG:COG0197,TIGR:TIGR01164,KEGG:K02878 Ribosomal protein L16/L10E	2.1	0	2	3.1	9	12.7	11.7	10.7	0	0	3	2	5.05	0.0866281	0.0503379	NULL
CLST007787 KEGG:K02876,COG:COG0200,TIGR:TIGR01071 Ribosomal protein L15	2.1	2.4	9.2	7.2	9.9	6.3	5.4	1.8	4.5	0	0	0	5.85	0.0325149	0.028218	UP
CLST007797 KEGG:K02956,TIGR:TIGR00952,COG:COG0184 Ribosomal protein S15P/S13E	7.4	9.4	7.2	5.1	9.9	7.2	7.2	5.3	2.7	4.5	0	4	3.85	0.00802185	0.0127865	NULL
CLST008038 TIGR:TIGR02027,COG:COG0202,KEGG:K03040 DNA-directed RNA polymerase, alpha subunit/40 kD subunit	13.8	10.6	6.1	12.4	11.7	6.3	0.9	1.8	3.6	2.7	0	0	7.1	0.0503943	0.034399	UP
[truncated: 158 more rows]

## Sheet: Healthy_vs_CCD_HumanOnly
Protein	6a_2	6a_3	6b_1	6b_2	16b_2	16b_3	18b_1	18b_2	9a_1	9a_2	9b_1	9b_2	Difference	Pvalue	Qvalue	Change
[truncated: 151 more rows]

[truncated: 2 more sheets: ICD_vs_CCD_MicrobialOnly, ICD_vs_CCD_HumanOnly]
