# Supplementary material for: Integrated Metagenomics/Metaproteomics Reveals Human Host-Microbiota Signatures of Crohn's Disease
Source: PLoS One. 2012 Nov 28;7(11):e49138. doi: 10.1371/journal.pone.0049138 (PMC3509130; doi:10.1371/journal.pone.0049138)
Supplement: Table S12 — False discovery rates of read-based peptides from MM metaproteomic database searches for three MS experiments: 6b, run 1 (worksheet 1), 9a, run 2 (worksheet 2), and 18a, run 2 (worksheet 3) at a 1-peptide level with and without high mass accuracy. FDRs estimated post-database mapping of all read-based peptides to assembled contigs at a 2-peptide level are provide in the final worksheet. (XLS) [file pone.0049138.s009.xls]

## Sheet: 6b_Run1
6b, run 1 (healthy) read-based peptide FDRs
Redundant				Non-redundant
Total Peptides	39085	1		Total Peptides	13456	1
-10 < PPM < 10	27446	0.7022		-10 < PPM < 10	7139	0.5305
PPM ≤ -10 or PPM ≥ 10	11639	0.2978		PPM ≤ -10 or PPM ≥ 10	6317	0.4695
PPM ≤-10	4118	0.1054		PPM ≤-10	3024	0.2247
PPM ≥ 10	7521	0.1924		PPM ≥ 10	3293	0.2447
Total "forward" peptides	35940	1		Total "forward" peptides	10720	1
-10 < PPM < 10	27218	0.7573		-10 < PPM < 10	6952	0.6485
PPM ≤ -10 or PPM ≥ 10	8722	0.2427		PPM ≤ -10 or PPM ≥ 10	3768	0.3515
PPM ≤-10	2526	0.0703		PPM ≤-10	1668	0.1556
PPM ≥ 10	6196	0.1724		PPM ≥ 10	2100	0.1959
Total "reverse" peptides	3145	1		Total "reverse" peptides	2736	1
-10 < PPM < 10	228	0.0725		-10 < PPM < 10	187	0.0683
PPM ≤ -10 or PPM ≥ 10	2917	0.9275		PPM ≤ -10 or PPM ≥ 10	2549	0.9317
PPM ≤-10	1592	0.5062		PPM ≤-10	1356	0.4956
PPM ≥ 10	1325	0.4213		PPM ≥ 10	1193	0.436
FDR:	Total: 16.09%	PPMrange: 1.17%		FDR:	Total: 40.67%	PPMrange: 2.78%

## Sheet: 9a_Run2
9a, run 2 (CCD) read-based peptide FDRs
Redundant				Non-redundant
Total Peptides	24154	1		Total Peptides	9222	1
-10 < PPM < 10	14967	0.6196		-10 < PPM < 10	3396	0.3682
PPM ≤ -10 or PPM ≥ 10	9187	0.3804		PPM ≤ -10 or PPM ≥ 10	5826	0.6318
PPM ≤-10	4806	0.199		PPM ≤-10	3436	0.3726
PPM ≥ 10	4381	0.1814		PPM ≥ 10	2390	0.2592
Total "forward" peptides	20415	1		Total "forward" peptides	6301	1
-10 < PPM < 10	14682	0.7192		-10 < PPM < 10	3181	0.5048
PPM ≤ -10 or PPM ≥ 10	5733	0.2808		PPM ≤ -10 or PPM ≥ 10	3120	0.4952
PPM ≤-10	2654	0.13		PPM ≤-10	1798	0.2854
PPM ≥ 10	3079	0.1508		PPM ≥ 10	1322	0.2098
Total "reverse" peptides	3739	1		Total "reverse" peptides	2921	1
-10 < PPM < 10	285	0.0762		-10 < PPM < 10	215	0.0736
PPM ≤ -10 or PPM ≥ 10	3454	0.9238		PPM ≤ -10 or PPM ≥ 10	2706	0.9264
PPM ≤-10	2152	0.5756		PPM ≤-10	1638	0.5608
PPM ≥ 10	1302	0.3482		PPM ≥ 10	1068	0.3656
FDR:	Total: 30.96%	PPMrange: 2.36%		FDR:	Total: 63.35%	PPMrange: 4.66%

## Sheet: 18a_Run2
18a, run 2 (ICD) read-based peptide FDRs
Redundant				Non-redundant
Total Peptides	23909	1		Total Peptides	8921	1
-10 < PPM < 10	15224	0.6367		-10 < PPM < 10	3725	0.4176
PPM ≤ -10 or PPM ≥ 10	8685	0.3633		PPM ≤ -10 or PPM ≥ 10	5196	0.5824
PPM ≤-10	3896	0.163		PPM ≤-10	2932	0.3287
PPM ≥ 10	4789	0.2003		PPM ≥ 10	2264	0.2538
Total "forward" peptides	20887	1		Total "forward" peptides	6429	1
-10 < PPM < 10	15033	0.7197		-10 < PPM < 10	3564	0.5544
PPM ≤ -10 or PPM ≥ 10	5854	0.2803		PPM ≤ -10 or PPM ≥ 10	2865	0.4456
PPM ≤-10	2166	0.1037		PPM ≤-10	1535	0.2388
PPM ≥ 10	3688	0.1766		PPM ≥ 10	1330	0.2069
Total "reverse" peptides	3022	1		Total "reverse" peptides	2492	1
-10 < PPM < 10	191	0.0632		-10 < PPM < 10	161	0.0646
PPM ≤ -10 or PPM ≥ 10	2831	0.9368		PPM ≤ -10 or PPM ≥ 10	2331	0.9354
PPM ≤-10	1730	0.5725		PPM ≤-10	1397	0.5606
PPM ≥ 10	1101	0.3643		PPM ≥ 10	934	0.3748
FDR:	Total: 25.28%	PPMrange: 1.60%		FDR:	Total: 55.87%	PPMrange: 3.61%

## Sheet: MM protein-based peptide FDR
Protein-based peptide FDRs (post-database mapping of ≥1 peptide/read sequences to proteins using only high ppm peptides with ≥2 peptides/protein)
Sample	Total Peptides	Total Identified Forward	Total Identified Reverse	Total F+R (shared) Peptides	False Discovery Rate
6b, run 1	5362	5316	9	37	1.70402
9a, run 2	2293	2261	0	32	2.75269
18a, run 2	2209	2199	0	10	0.901307
Sample	Total Peptides	Total Identified Forward	Total Identified Reverse	False Discovery Rate
6b, run 1	5325	5316	9	0.338028
9a, run 2	2261	2261	0	0
18a, run 2	2199	2199	0	0
